# Supplementary material
Source: PubMed Central journal article supplement (PMC3314534)

# **Synthesis and evaluation of indole-based chalcones as inducers of methuosis, a novel type of non-apoptotic cell death**

Michael W. Robinson<sup>†</sup>, Jean H. Overmeyer<sup>†</sup>, Ashley M. Young<sup>†</sup>, Paul W. Erhardt<sup>†\*</sup>,  
William A. Maltese<sup>†\*</sup>

<sup>†</sup>Department of Biochemistry and Cancer Biology, University of Toledo College of Medicine, 3000 Arlington Ave., Toledo, OH 43614

<sup>‡</sup>Center for Drug Design and Development, Department of Medicinal and Biological Chemistry, University of Toledo College of Pharmacy, 2801 W. Bancroft Ave., Toledo, OH 43606

## AUTHOR INFORMATION

\*Corresponding Authors: For William A. Maltese: Phone, 419-383-4161; Fax, 419-383-6228; e-mail, [william.maltese@utoledo.edu](mailto:william.maltese@utoledo.edu). For Paul W. Erhardt: Phone, 419-530-2167; Fax, 419-530-1994; e-mail, [paul.erhardt@utoledo.edu](mailto:paul.erhardt@utoledo.edu).

SUPPORTING INFORMATION CONTENTS  
S2 – S113: NMR and IR spectra for all compounds

S2

STANDARD PROTON PARAMETERS

Pulse Sequence: s2pu1

Solvent: DMSO  
Ambient temperature  
File: 100204b  
INOVA-600 "inova-wkst"

Relax. delay 1.000 sec  
Pulse 31.8 degrees  
Acq. time 3.000 sec  
Width 8999.9 Hz  
16 repetitions  
OBSERVE H1, 599.8751442 MHz  
DATA PROCESSING  
Line broadening 0.4 Hz  
FT size 131072  
Total time 1 min, 4 sec

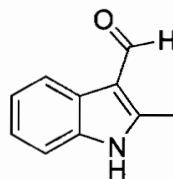

2a

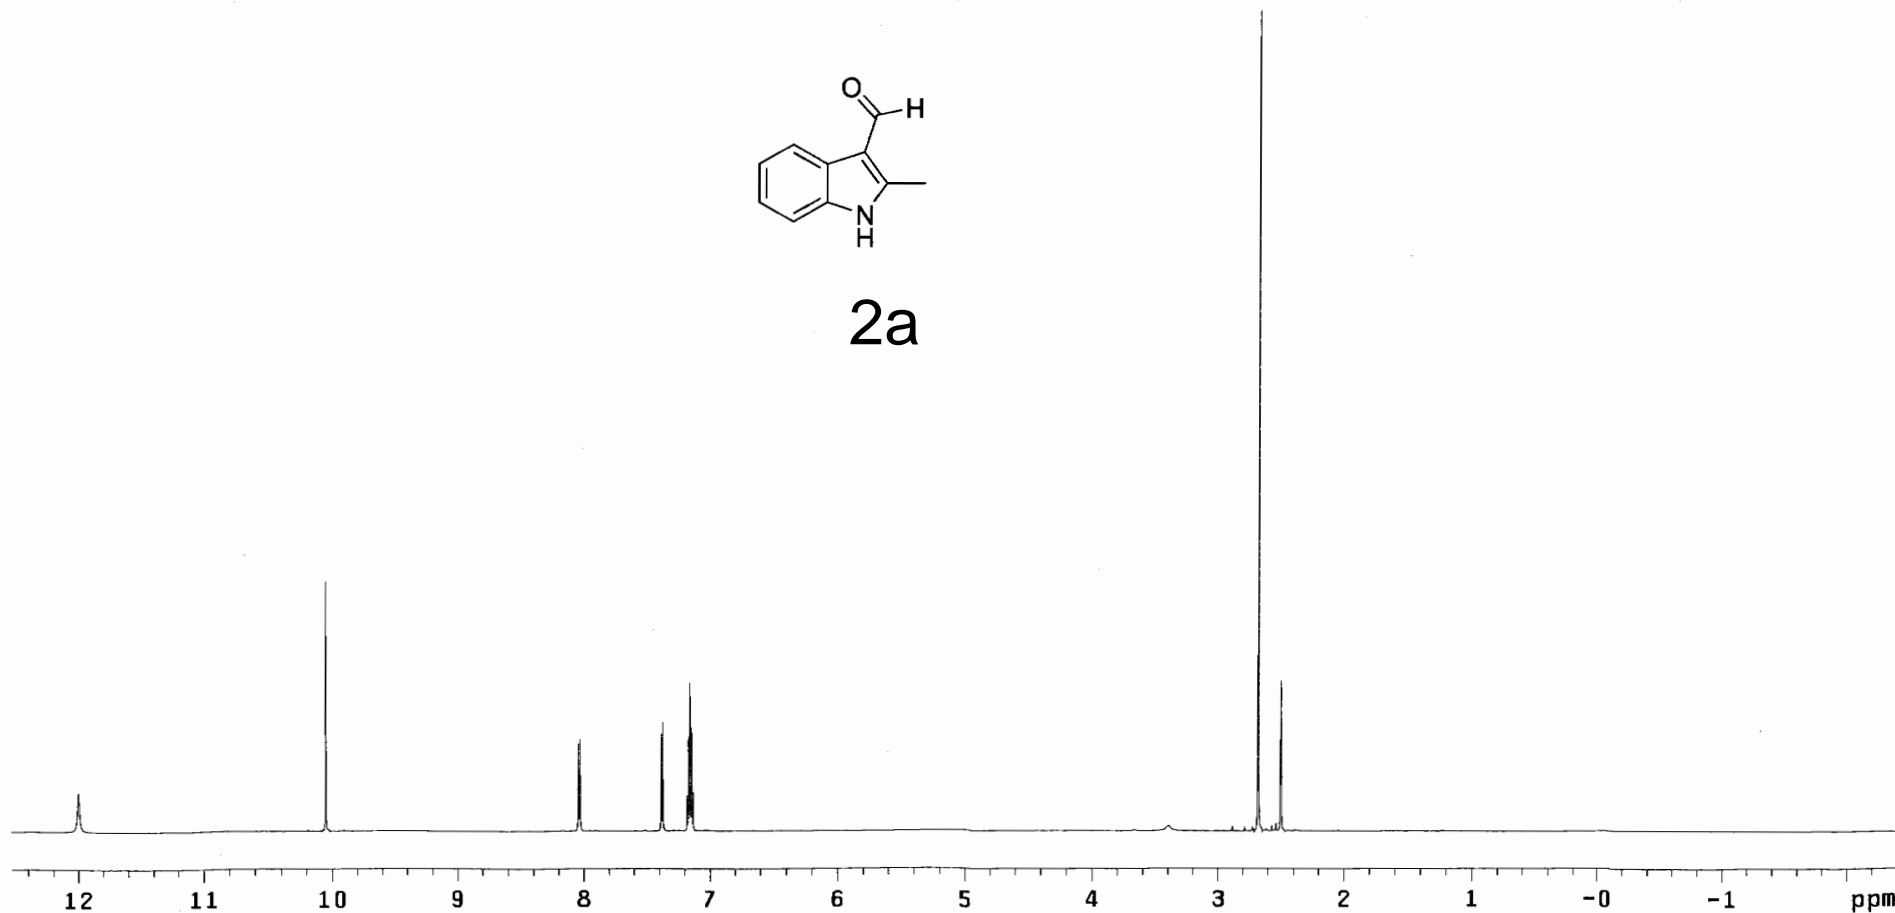

S3

<sup>13</sup>C OBSERVE

Jun 10 2011

Pulse Sequence: s2pu1

Solvent: DMSO  
Ambient temperature  
GEMINI-200BB "gem2000"

Relax. delay 0.800 sec  
Pulse 48.2 degrees  
Acq. time 0.600 sec  
Width 12500.0 Hz  
4832 repetitions  
OBSERVE C13, 50.2840312 MHz  
DECOUPLE H1, 199.9767234 MHz  
Power 34 dB  
continuously on  
WALTZ-16 modulated  
DATA PROCESSING  
Gauss window 0.400 sec  
center at 0.050 sec  
FT size 131072  
Total time 41 hr, 44 min, 49 sec

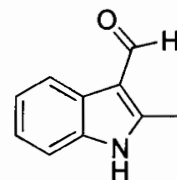

2a

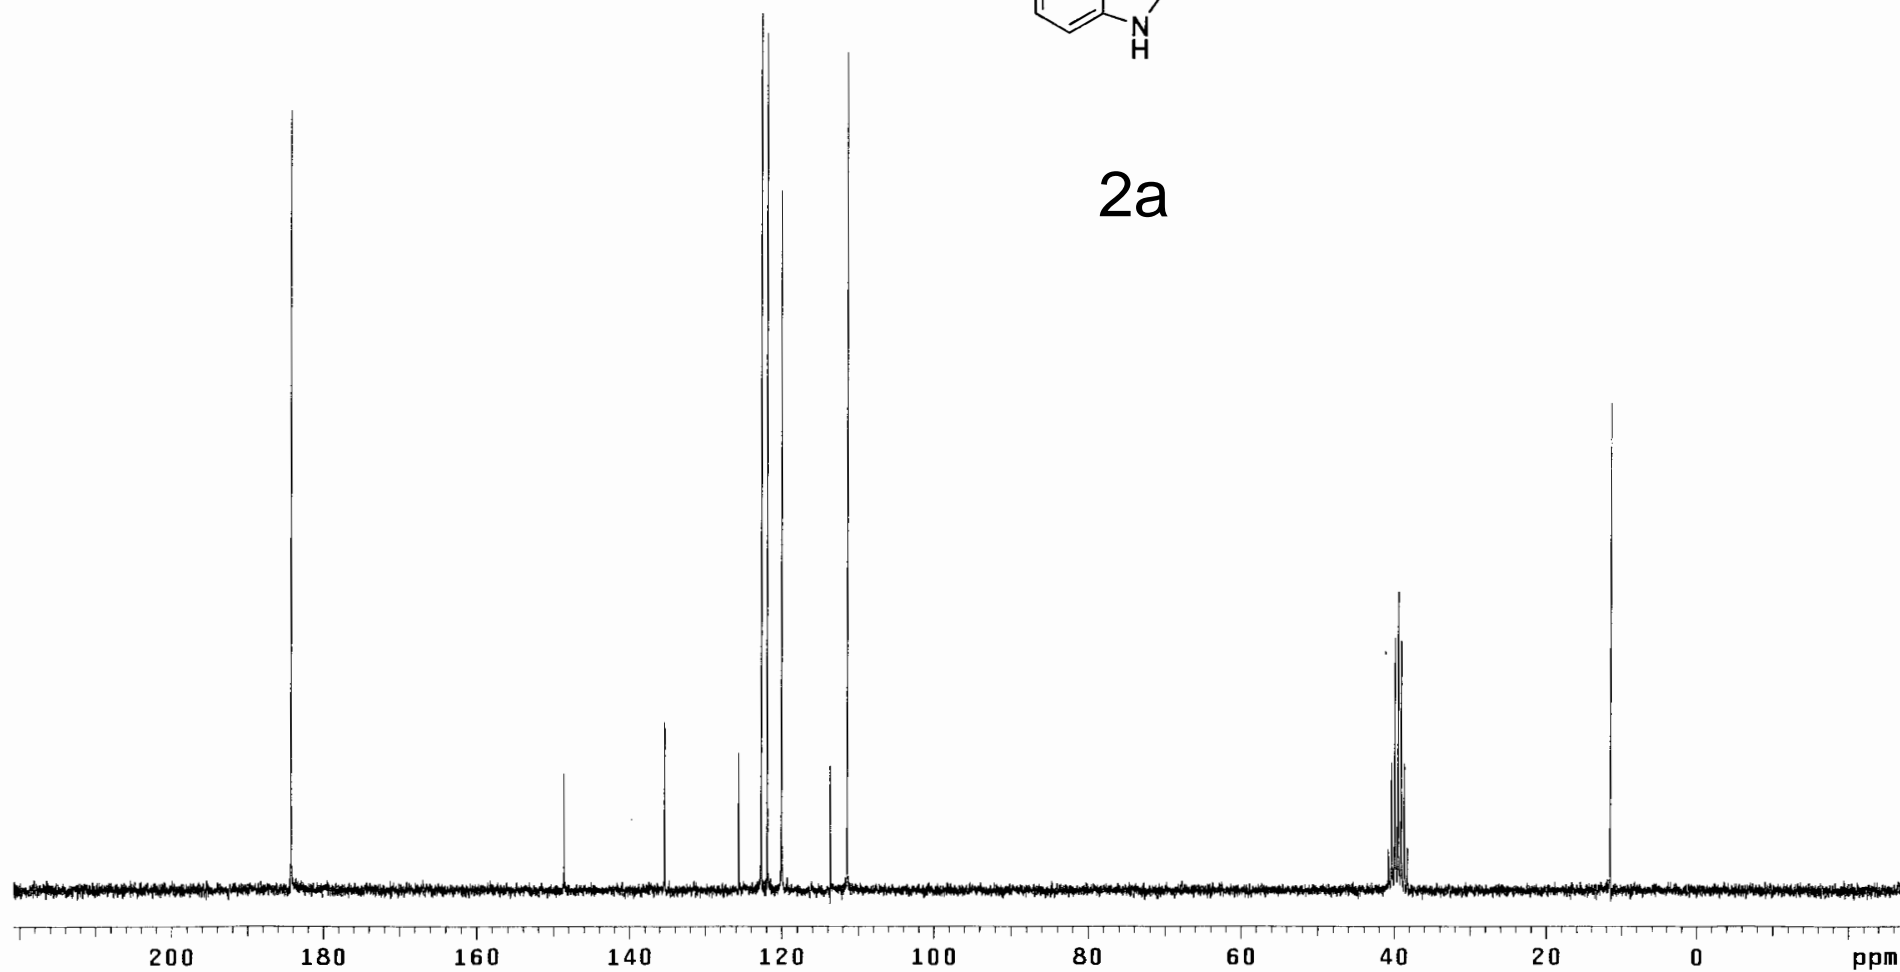

S4

STANDARD 1H OBSERVE

Pulse Sequence: relayh

Solvent: DMSO  
Ambient temperature  
GEMINI-200BB "gem2000"

Relax. delay 1.000 sec  
COSY 90-90  
Acq. time 0.196 sec  
Width 327.2 Hz  
2D Width 327.2 Hz  
4 repetitions  
64 increments

OBSERVE H1, 199.9760204 MHz  
DATA PROCESSING  
Sine bell 0.098 sec  
F1 DATA PROCESSING  
Sine bell 0.098 sec  
FT size 128 x 128  
Total time 5 min, 59 sec

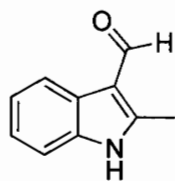

2a

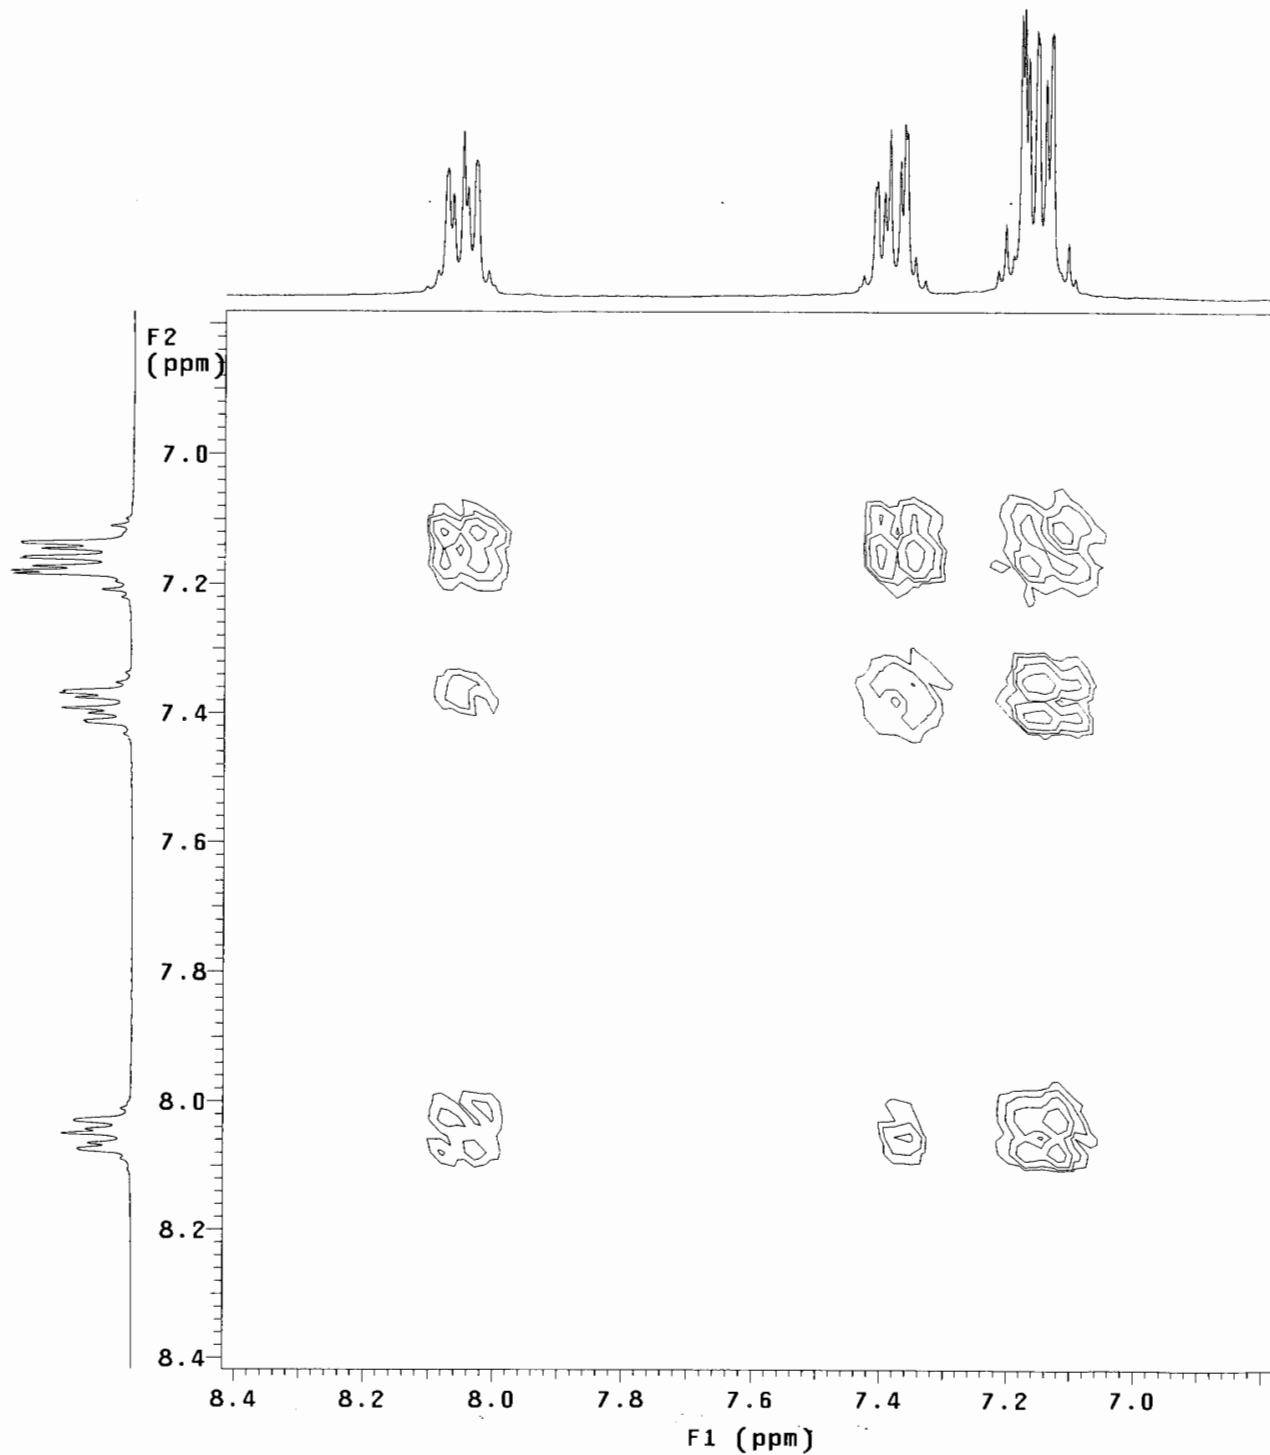

S5

STANDARD PROTON PARAMETERS

Pulse Sequence: gcosy

Solvent: DMSO

Ambient temperature

File: 100218c

INOVA-600 "inova-wkst"

Relax. delay 1.000 sec

Acq. time 0.140 sec

Width 3654.3 Hz

2D Width 3654.3 Hz

Single scan

256 increments

OBSERVE H1, 599.8751457 MHz

DATA PROCESSING

Sine bell 0.070 sec

F1 DATA PROCESSING

Sine bell 0.035 sec

FT size 1024 x 1024

Total time 5 min, 6 sec

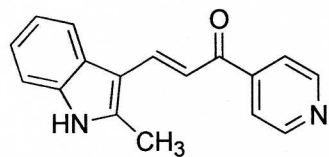

2

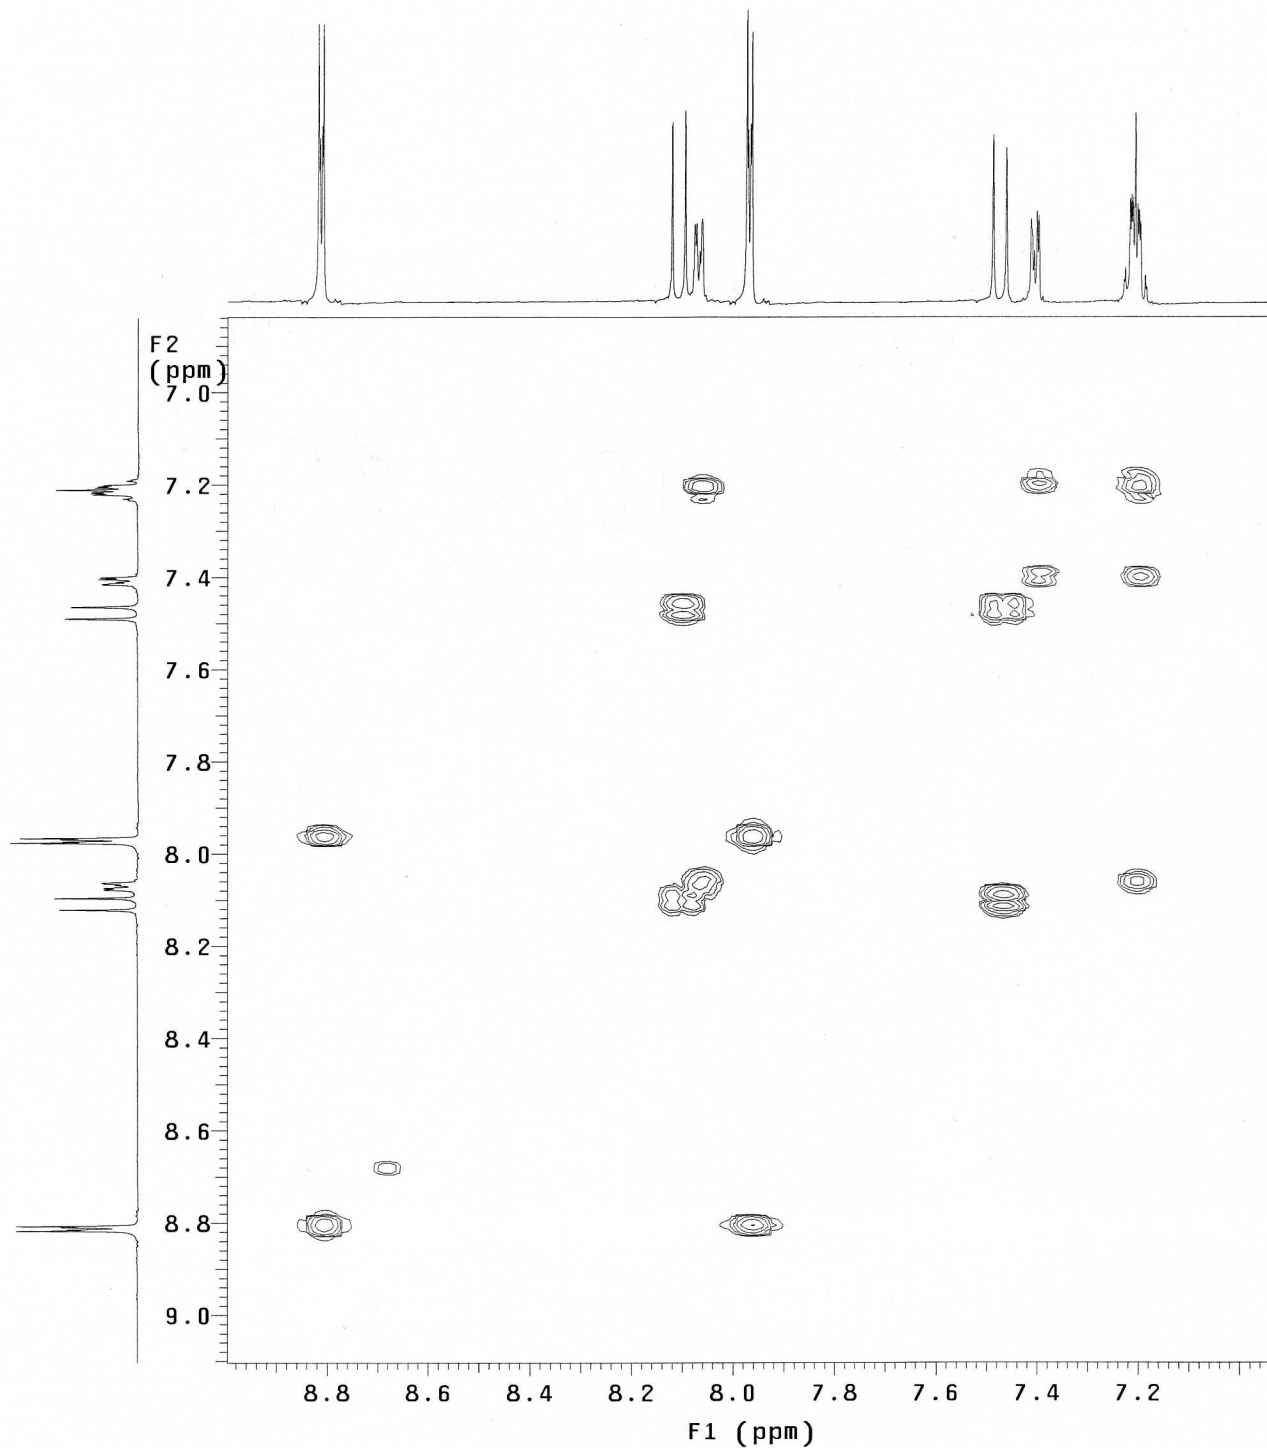

S6

STANDARD PROTON PARAMETERS

Pulse Sequence: s2pu1

Solvent: DMSO

Ambient temperature

File: 100218b

INOVA-600 "inova-wkst"

Relax. delay 1.000 sec

Pulse 31.8 degrees

Acq. time 3.000 sec

Width 8999.9 Hz

16 repetitions

OBSERVE H1, 599.8751457 MHz

DATA PROCESSING

Line broadening 0.4 Hz

FT size 131072

Total time 1 min, 4 sec

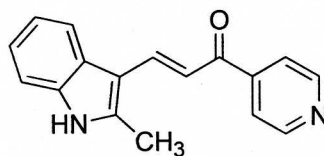

2

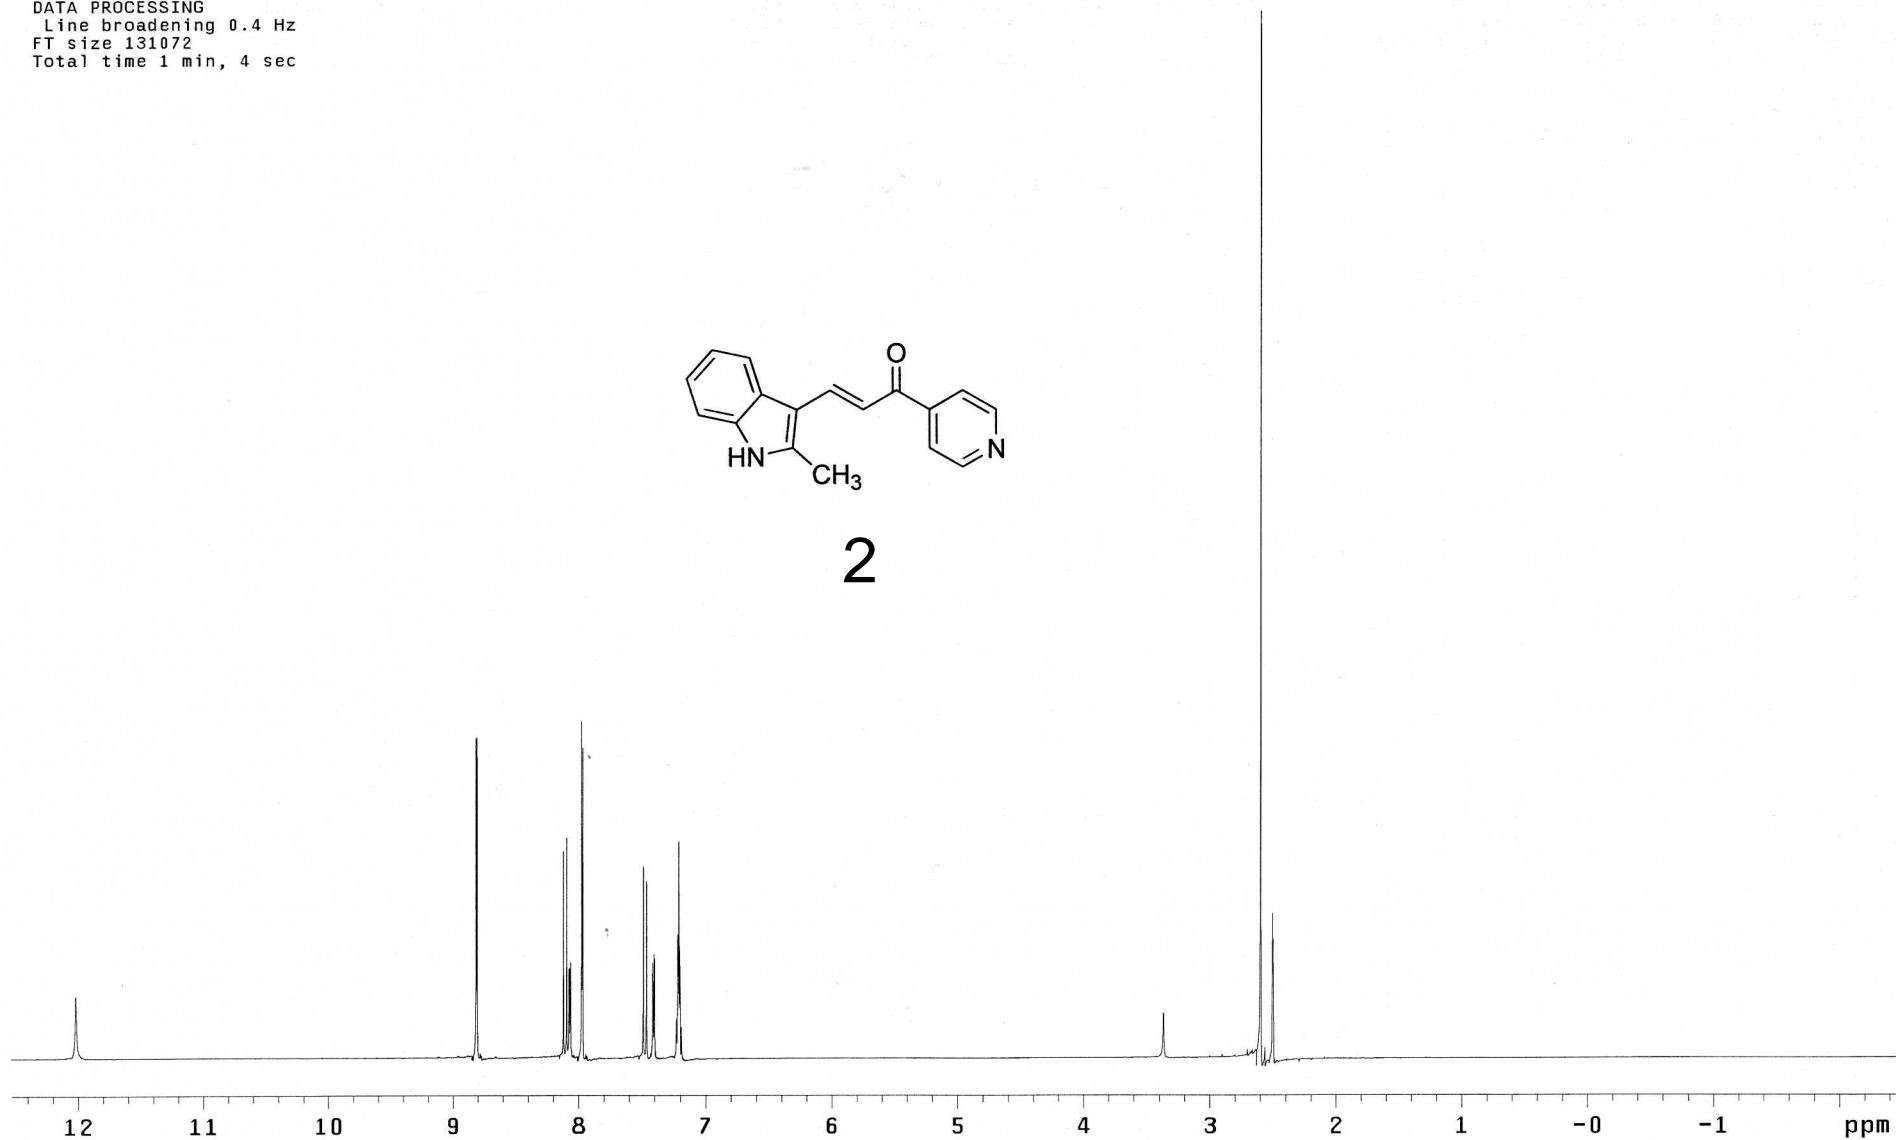

S7

STANDARD CARBON PARAMETERS

Pulse Sequence: s2pul

Solvent: DMSO  
Ambient temperature  
User: 1-14-87  
File: 100218a  
INOVA-600 "inova-wkst"

Pulse 51.7 degrees  
Acq. time 1.000 sec  
Width 37735.8 Hz  
6208 repetitions  
OBSERVE C13, 150.8387920 MHz  
DECOUPLE H1, 599.8781638 MHz  
Power 32 dB  
continuously on  
WALTZ-16 modulated  
DATA PROCESSING  
Gauss window 0.600 sec  
center at 0.100 sec  
FT size 524288  
Total time 2 hr, 48 min, 9 sec

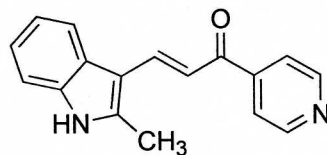

2

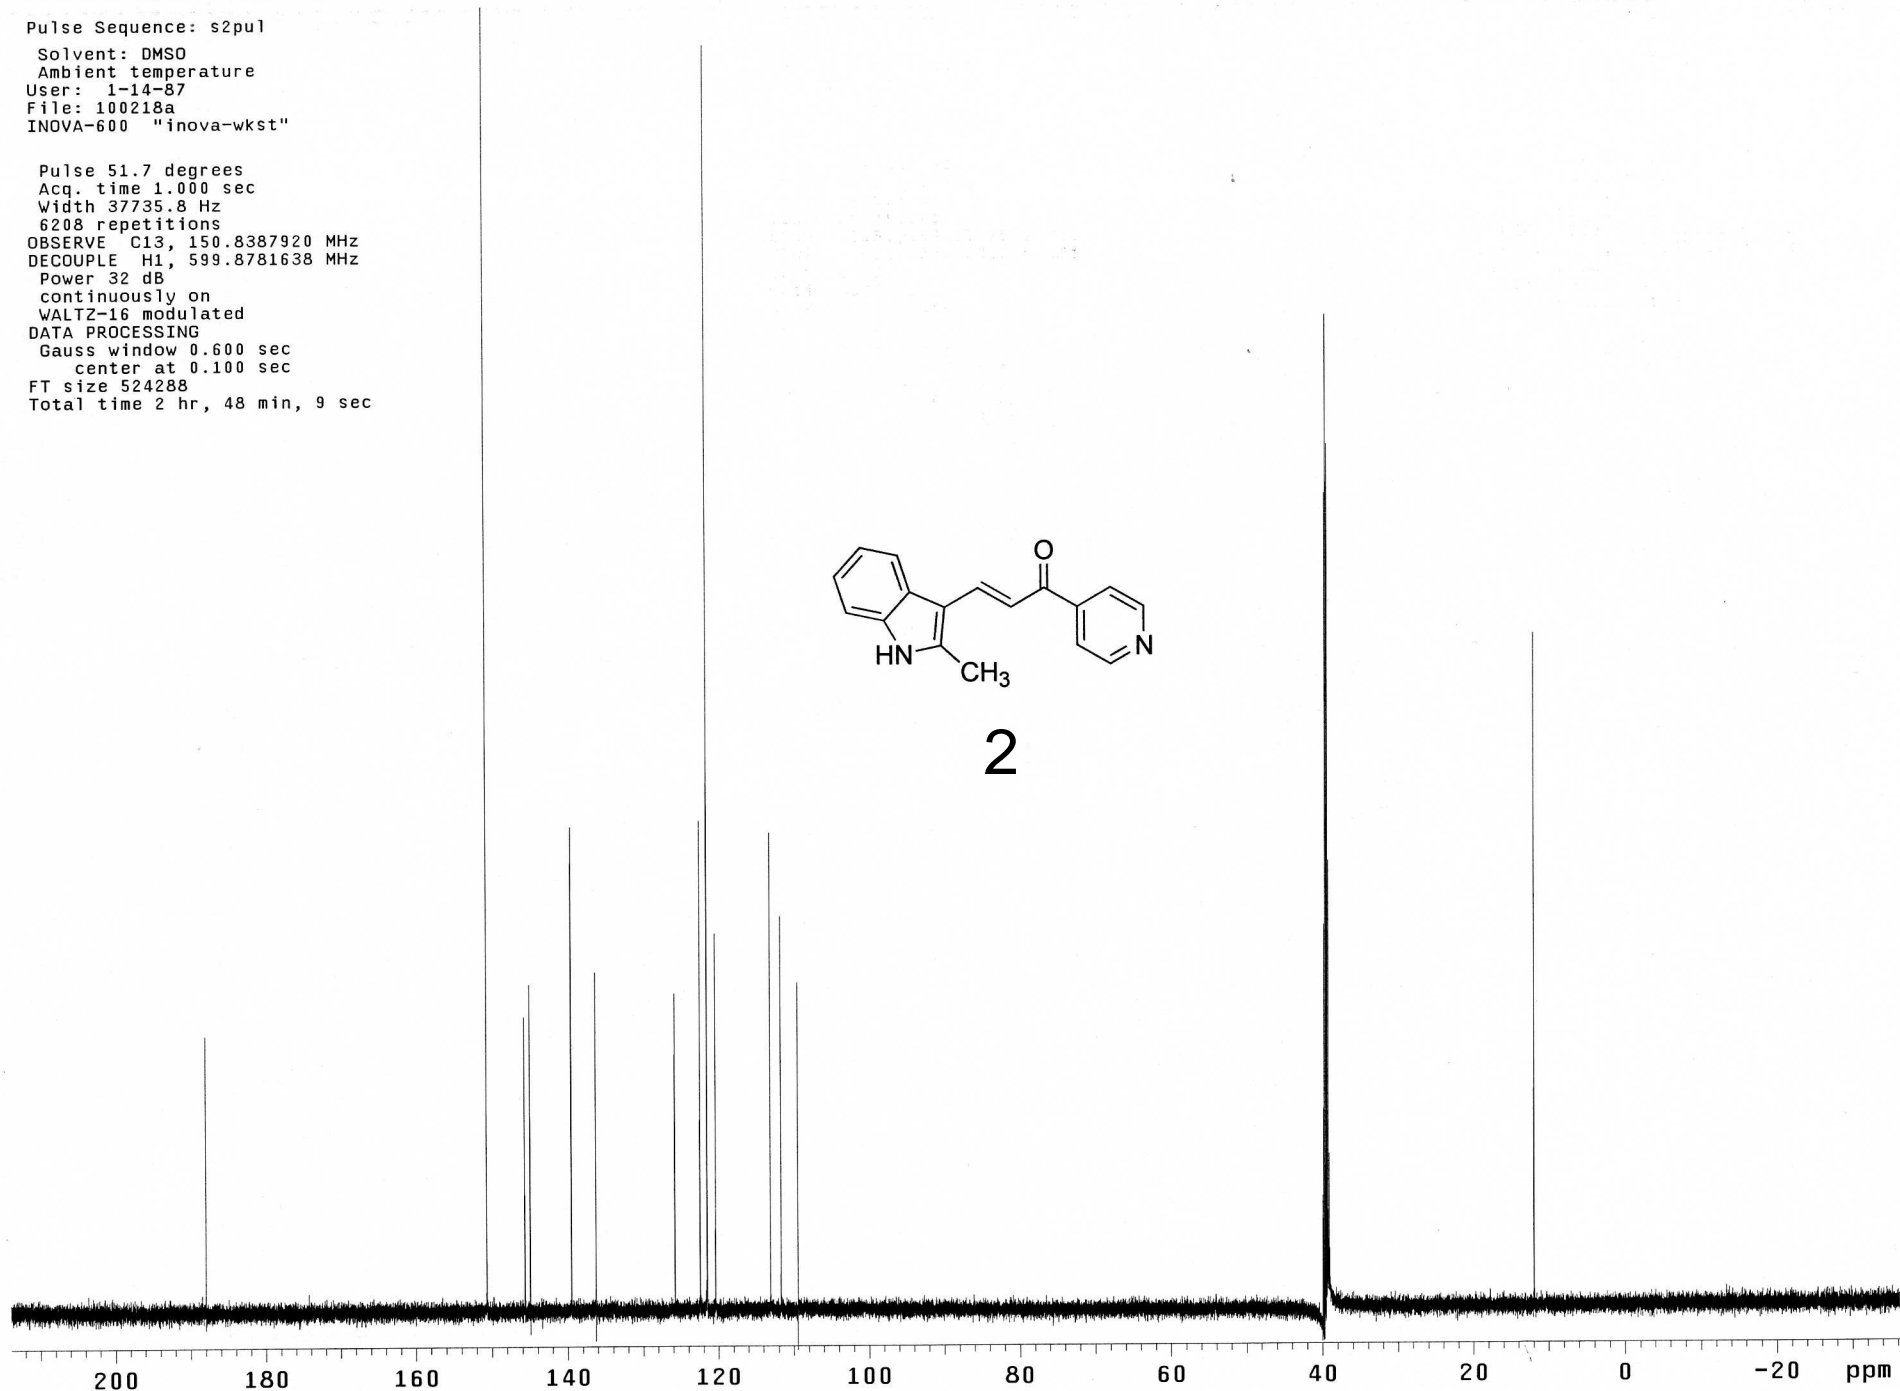

S8

STANDARD PROTON PARAMETERS

Pulse Sequence: s2pu1

Solvent: DMSO

Ambient temperature

File: 091006b

GEMINI-200BB "gem2000"

Relax. delay 1.000 sec

Pulse 30.9 degrees

Acq. time 3.000 sec

Width 8000.0 Hz

16 repetitions

OBSERVE H1, 599.8751449 MHz

DATA PROCESSING

Line broadening 0.4 Hz

FT size 131072

Total time 1 min, 10 sec

Oct 6 2009

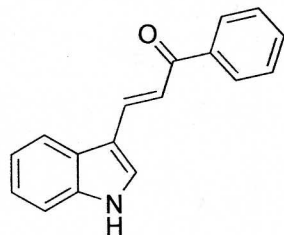

9

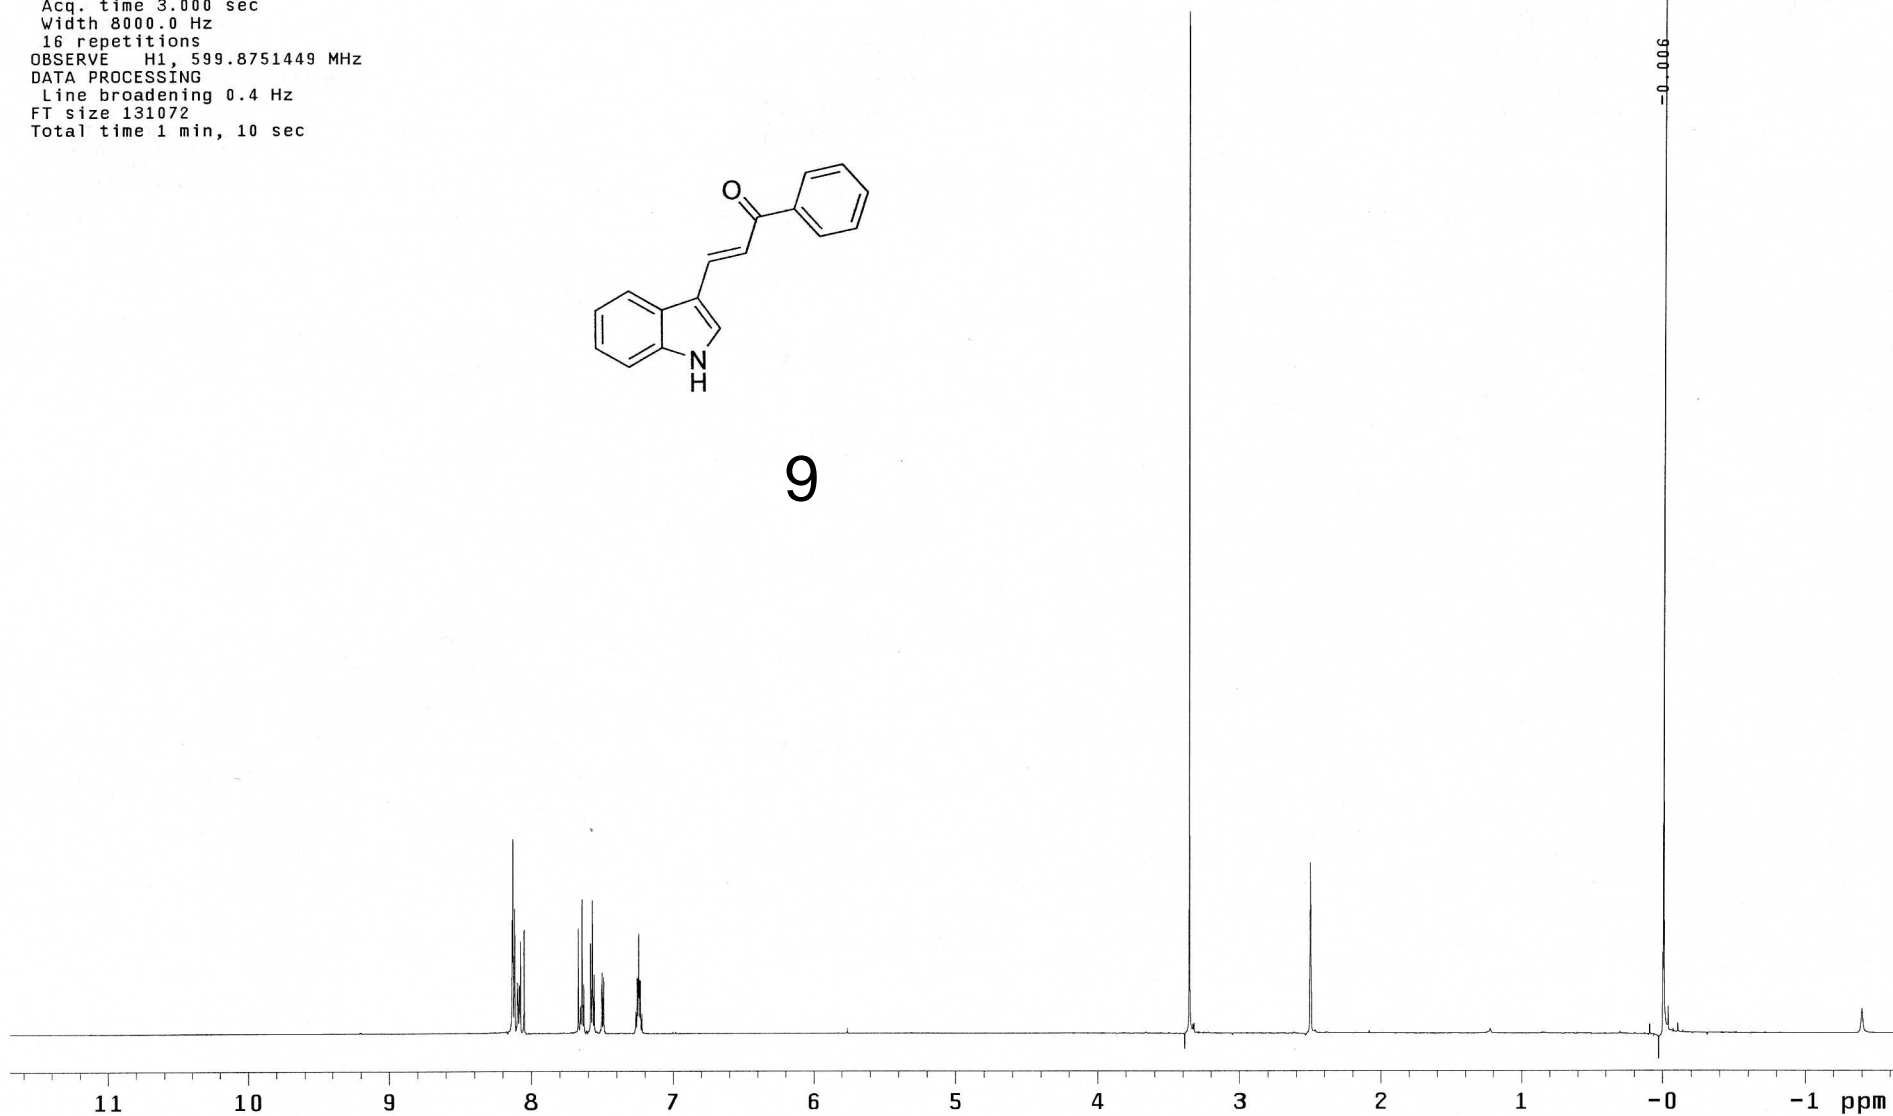



## STANDARD CARBON PARAMETERS

Pulse Sequence: s2pul

Solvent: DMSO  
Ambient temperature  
User: 1-14-87  
File: 091007a  
GEMINI-200BB "gem2000"

Pulse 54.9 degrees  
Acq. time 1.000 sec  
Width 37735.8 Hz  
46384 repetitions  
OBSERVE C13, 150.8387929 MHz  
DECOUPLE H1, 599.8781638 MHz  
Power 32 dB  
continuously on  
WALTZ-16 modulated  
DATA PROCESSING  
Gauss window 0.600 sec  
center at 0.100 sec  
FT size 524288  
Total time 36 hr, 47 min, 1 sec

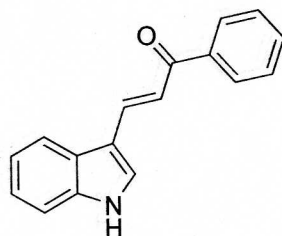

9

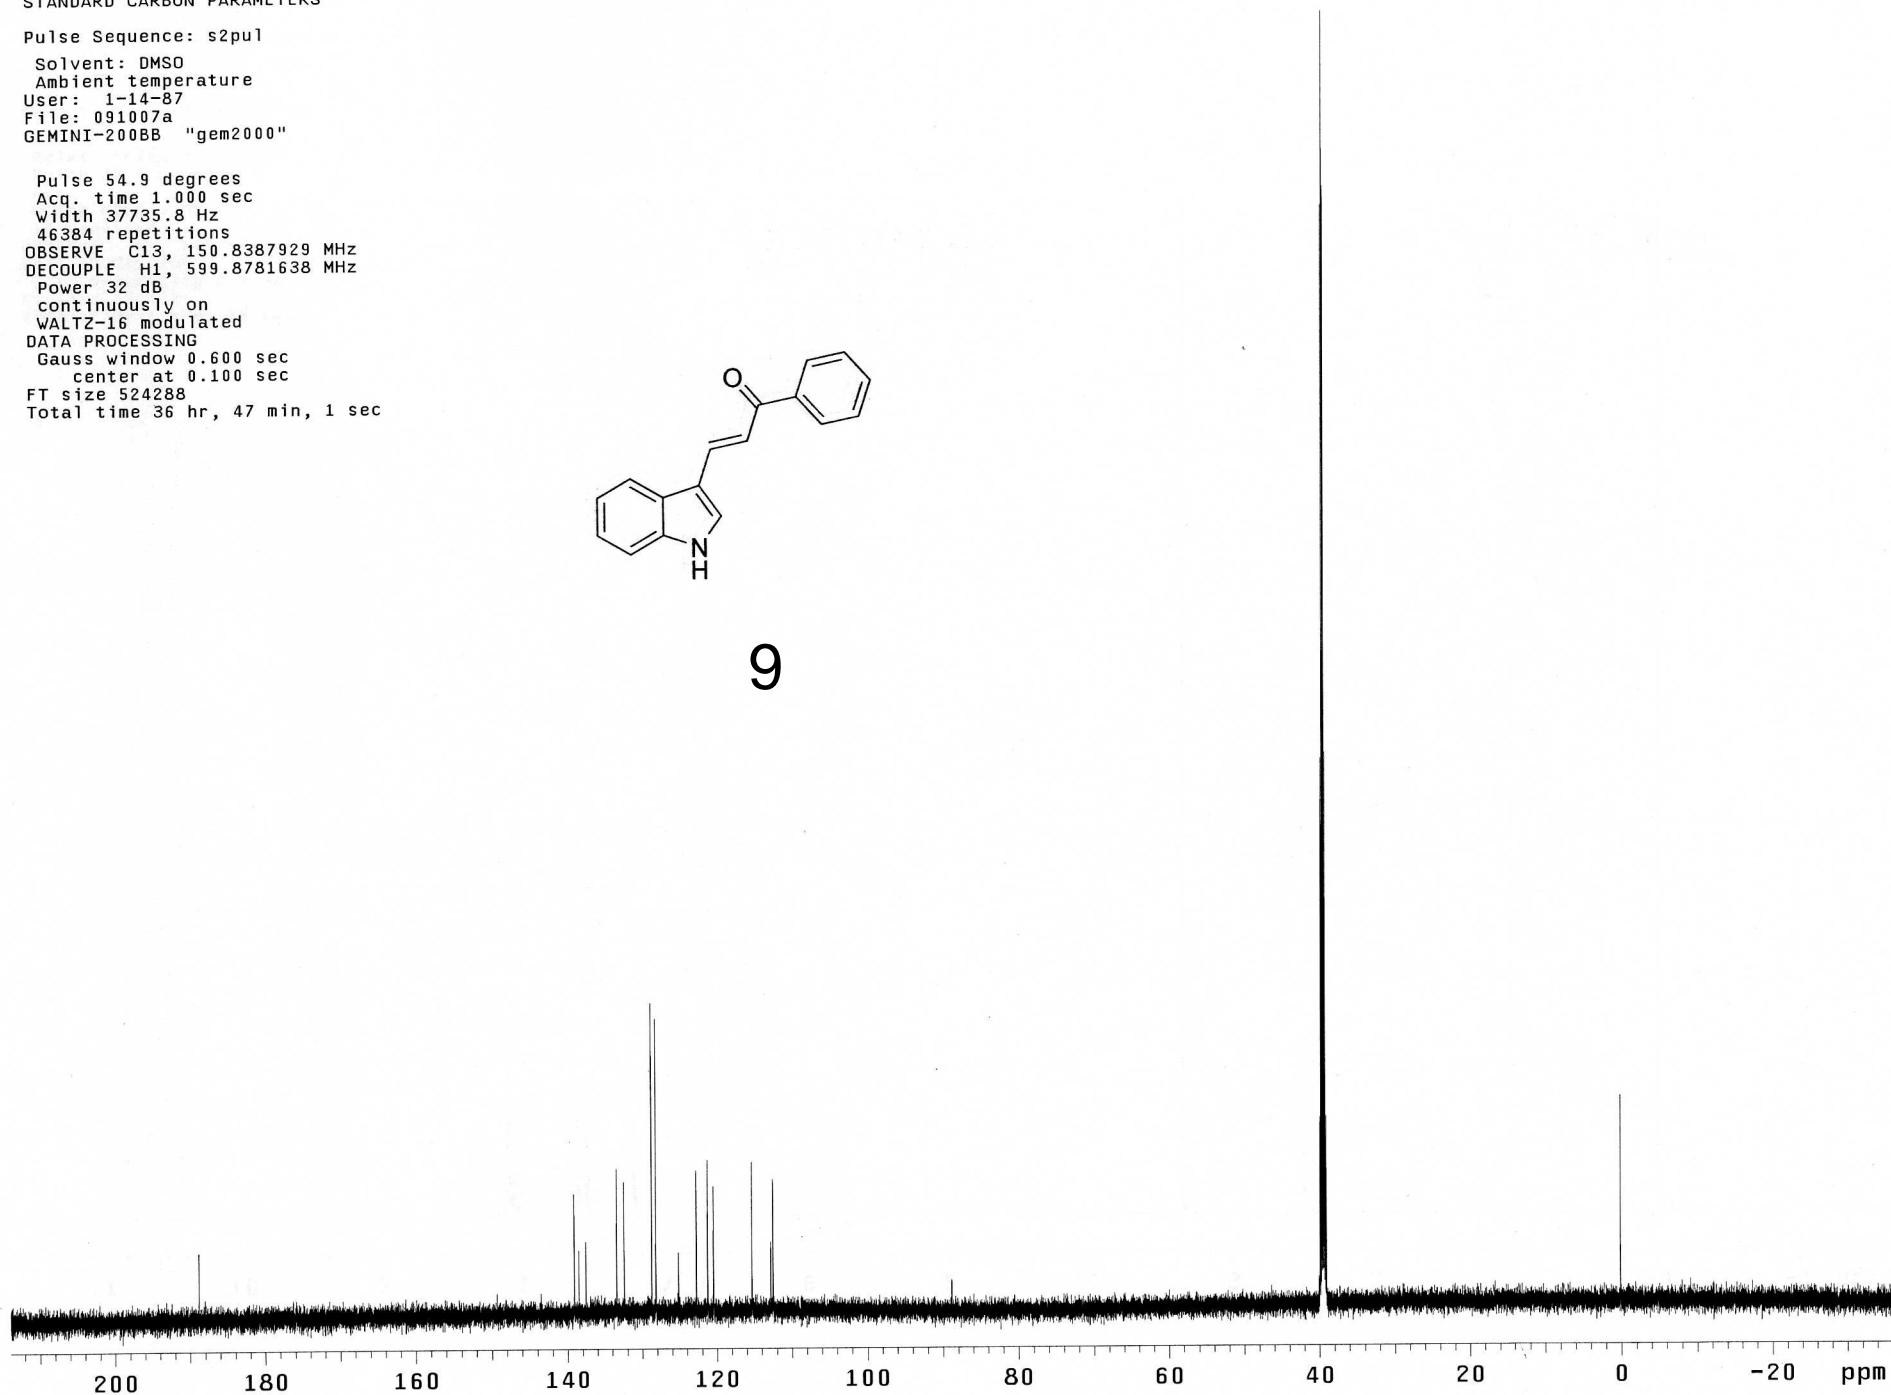

S10

STANDARD PROTON PARAMETERS

Pulse Sequence: gcosy

Solvent: DMSO

Ambient temperature

File: 091006c

GEMINI-200BB "gem2000"

Relax. delay 1.000 sec

Acq. time 0.151 sec

Width 1700.2 Hz

2D Width 1700.2 Hz

Single scan

128 increments

OBSERVE H1, 599.8751449 MHz

DATA PROCESSING

Sine bell 0.075 sec

F1 DATA PROCESSING

Sine bell 0.038 sec

FT size 512 x 512

Total time 3 min, 14 sec

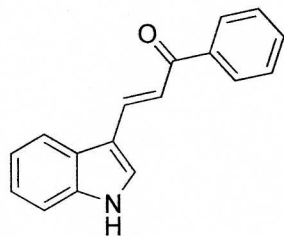

9

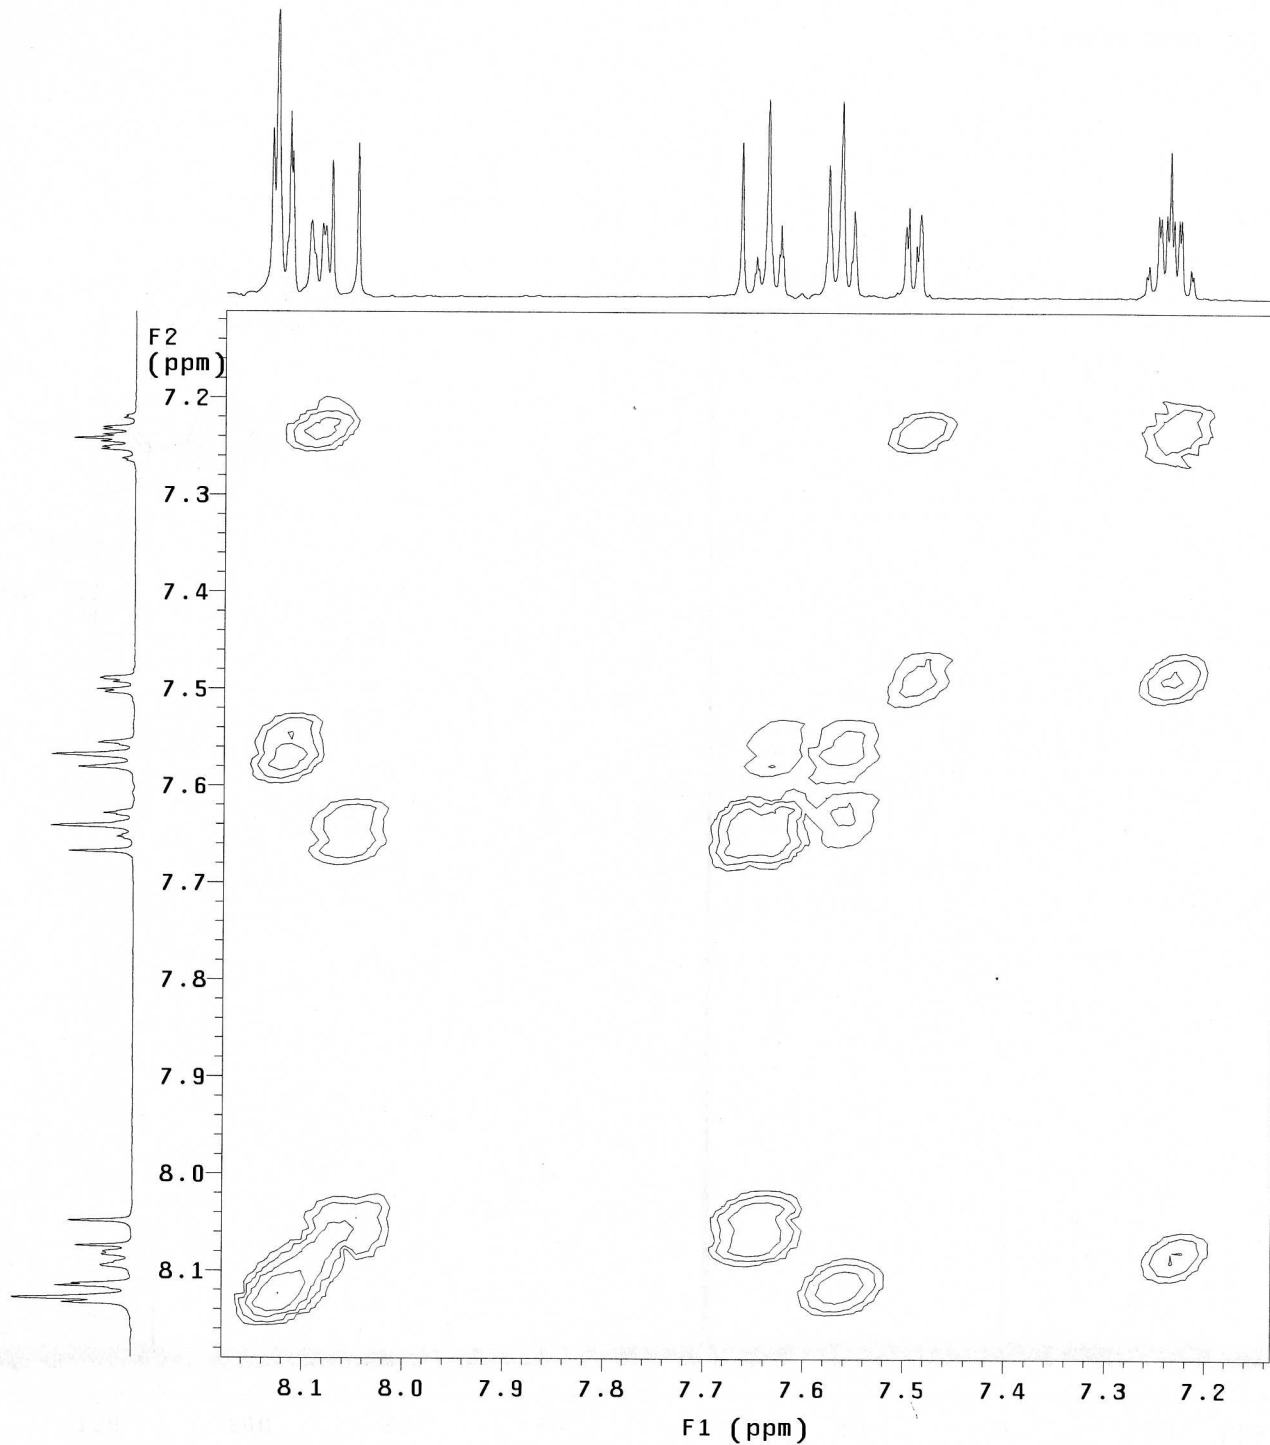

S11

STANDARD PROTON PARAMETERS

Pulse Sequence: s2pul  
Solvent: DMSO  
Ambient temperature  
File: 100729d  
INOVA-600 "inova600"

Relax. delay 1.000 sec  
Pulse 31.8 degrees  
Acq. time 3.000 sec  
Width 8999.9 Hz  
16 repetitions  
OBSERVE H1, 599.8751449 MHz  
DATA PROCESSING  
Line broadening 0.4 Hz  
FT size 131072  
Total time 1 min, 4 sec

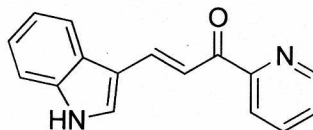

10

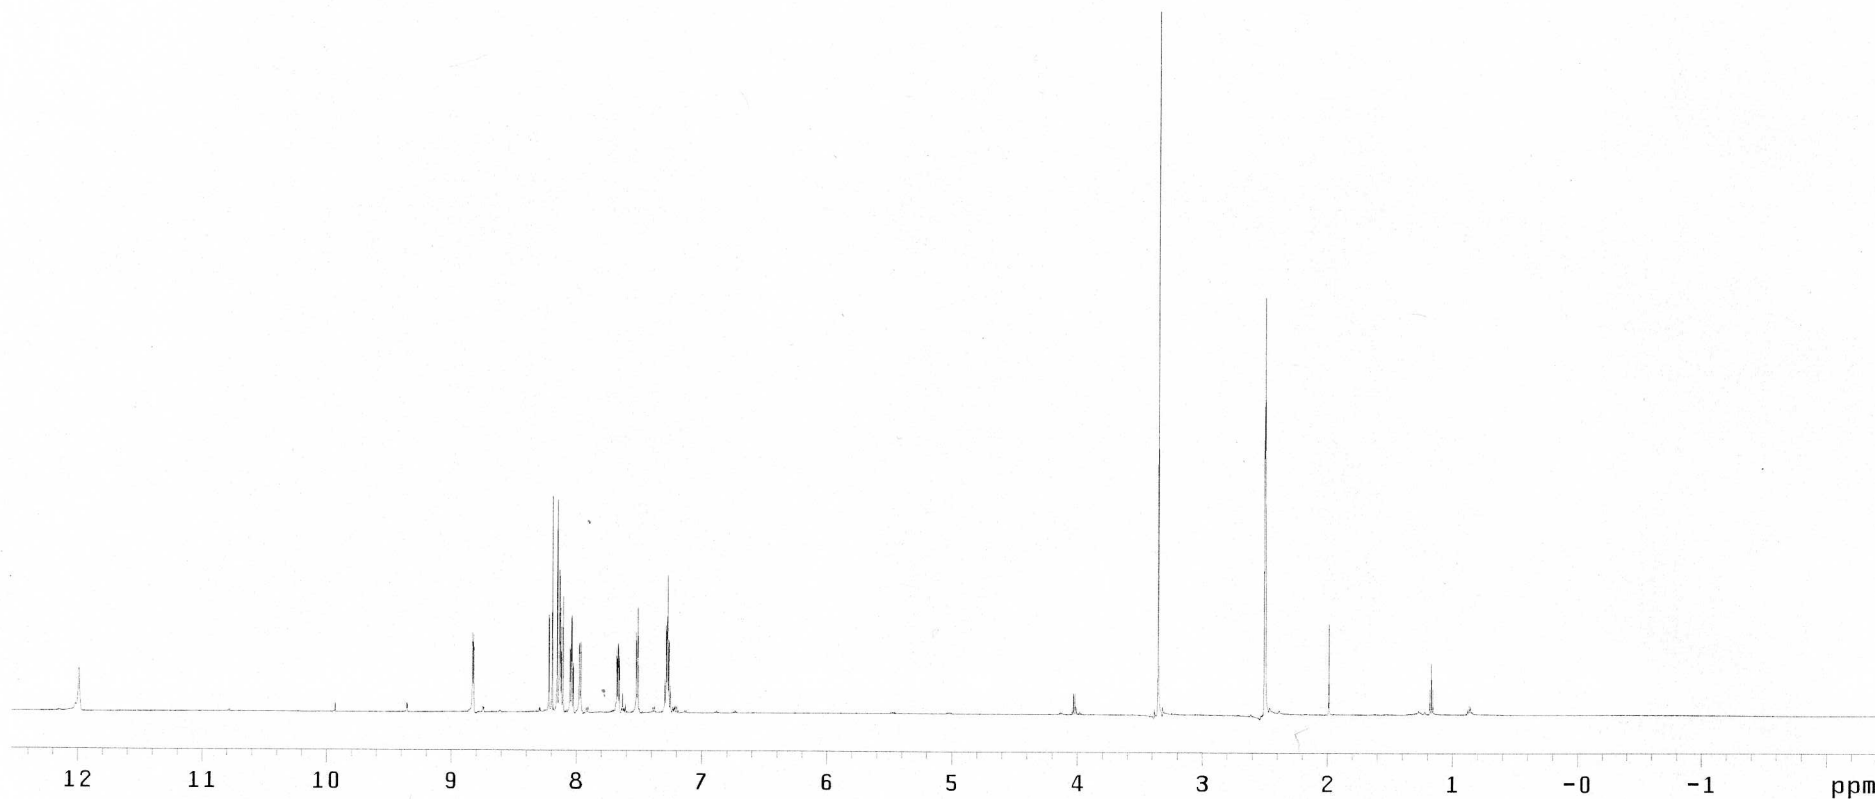

S12

STANDARD CARBON PARAMETERS

Pulse Sequence: s2pu1

Solvent: DMSO

Ambient temperature

User: 1-14-87

File: 100729f

INOVA-600 "inova600"

Pulse 46.4 degrees

Acq. time 1.000 sec

Width 37735.8 Hz

37600 repetitions

OBSERVE C13, 150.8387929 MHz

DECOUPLE H1, 599.8781638 MHz

Power 32 dB

continuously on

WALTZ-16 modulated

DATA PROCESSING

Gauss window 0.600 sec

center at 0.100 sec

FT size 524288

Total time 28 hr, 1 min, 31 sec

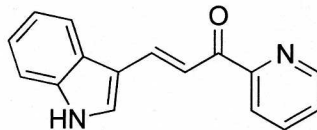

10

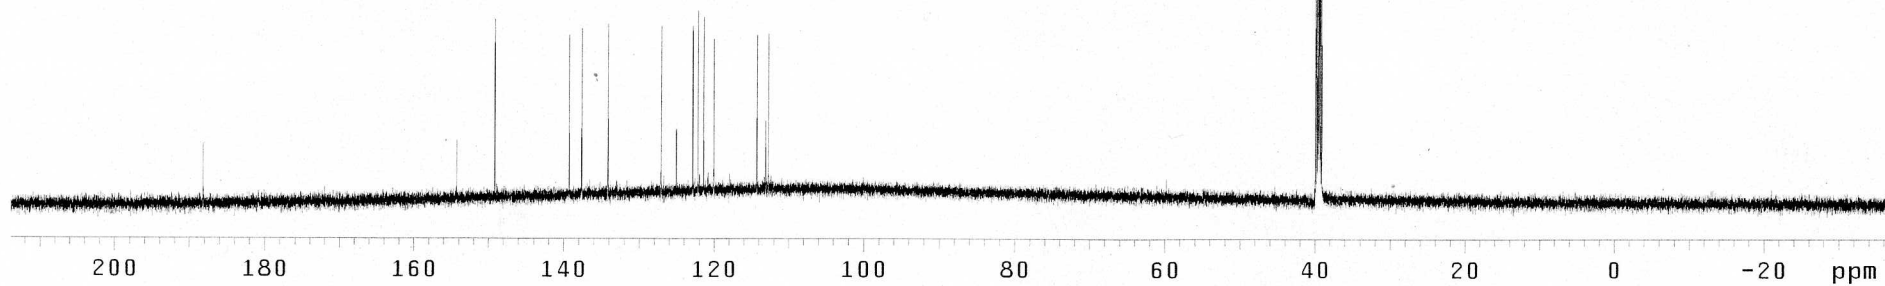

S13

STANDARD PROTON PARAMETERS

Pulse Sequence: gcosy

Solvent: DMSO

Ambient temperature

File: 100729e

INOVA-600 "inova600"

Relax. delay 1.000 sec

Acq. time 0.135 sec

Width 1892.2 Hz

2D Width 1892.2 Hz

Single scan

128 increments

OBSERVE H1, 599.8751449 MHz

DATA PROCESSING

Sine bell 0.068 sec

F1 DATA PROCESSING

Sine bell 0.034 sec

FT size 512 x 512

Total time 2 min, 33 sec

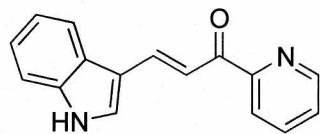

10

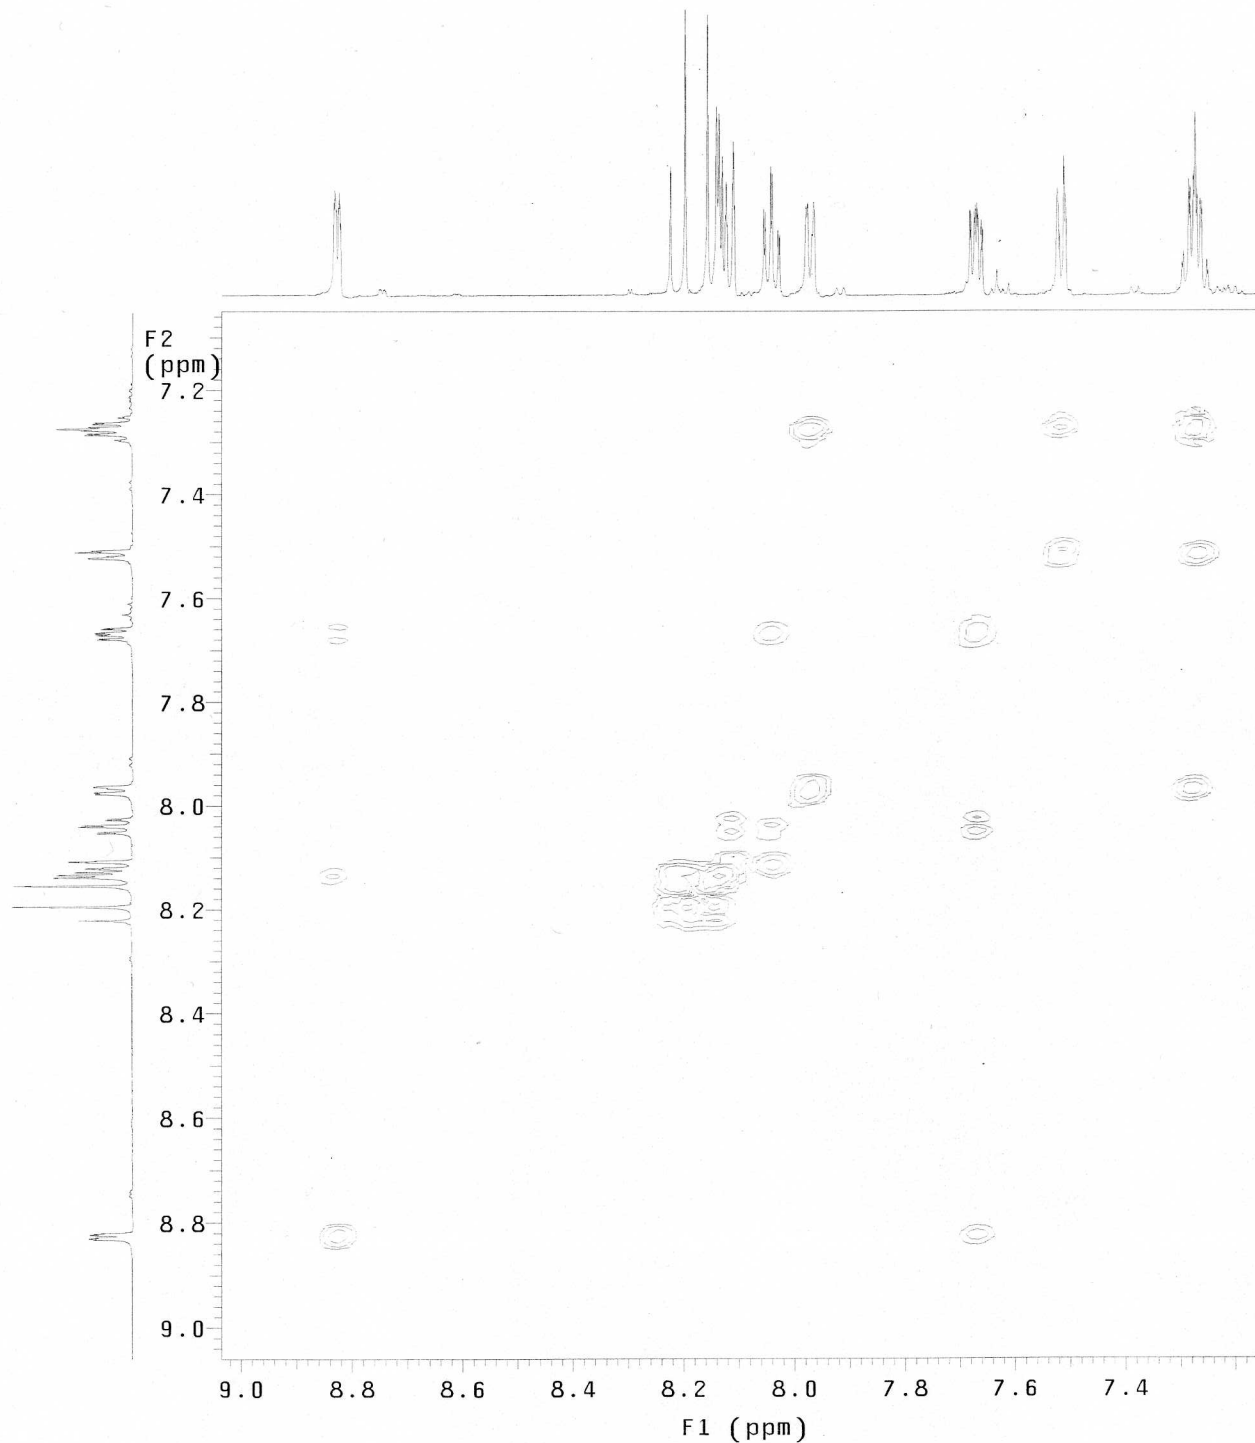

S14  
STANDARD PROTON PARAMETERS

Pulse Sequence: s2pu1  
Solvent: DMSO  
Ambient temperature  
File: 101028a  
INOVA-600 "inova-wkst"

Relax. delay 1.000 sec  
Pulse 31.8 degrees  
Acq. time 3.000 sec  
Width 8999.9 Hz  
16 repetitions  
OBSERVE H1, 599.8751455 MHz  
DATA PROCESSING  
Line broadening 0.4 Hz  
FT size 131072  
Total time 1 min, 4 sec

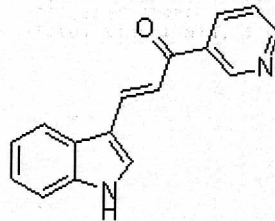

11

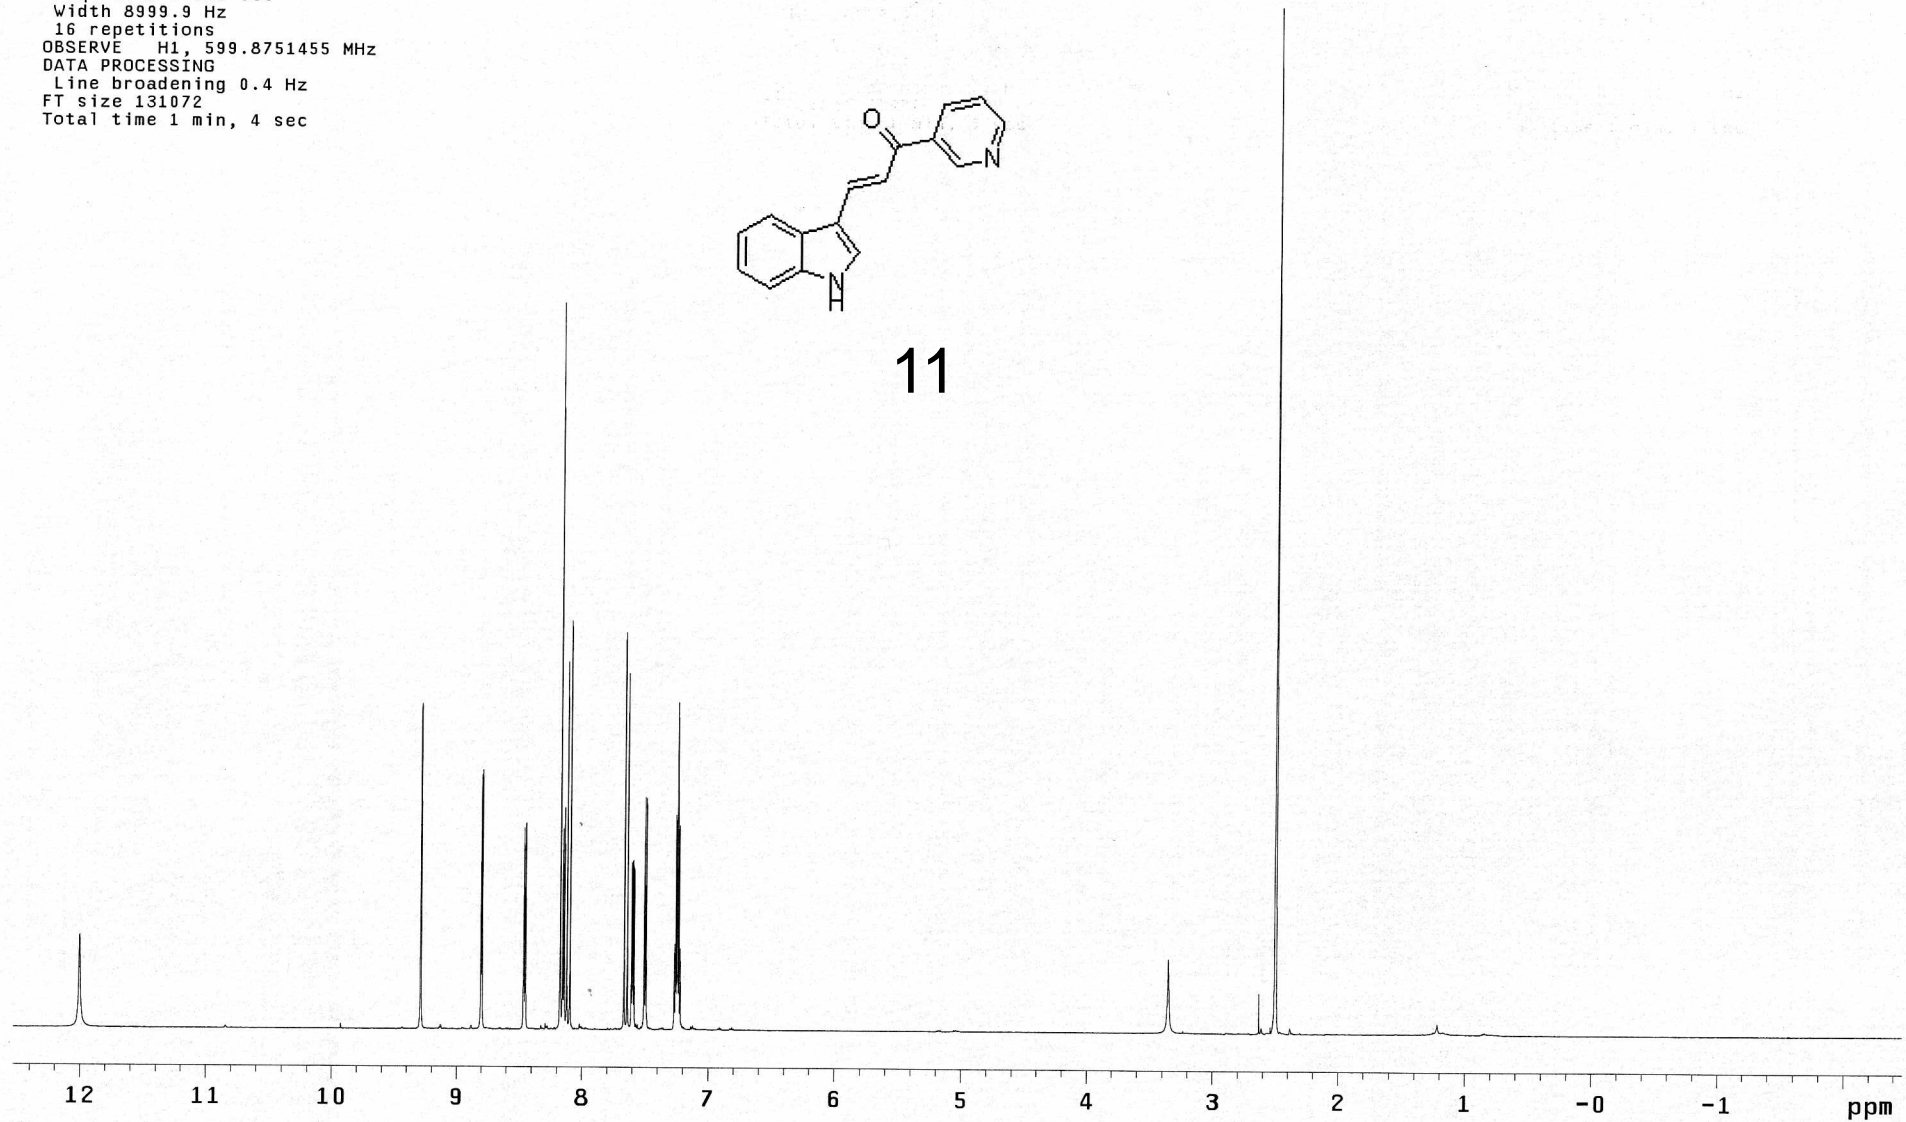

S15

STANDARD CARBON PARAMETERS

Pulse Sequence: s2pul

Solvent: DMSO

Ambient temperature

User: 1-14-87

File: 101028c

INOVA-600 "inova-wkst"

Pulse 46.4 degrees

Acq. time 1.000 sec

Width 37735.8 Hz

7632 repetitions

OBSERVE C13, 150.8387919 MHz

DECOUPLE H1, 599.8781638 MHz

Power 32 dB

continuously on

WALTZ-16 modulated

DATA PROCESSING

Gauss window 0.600 sec

center at 0.100 sec

FT size 524288

Total time 28 hr, 1 min, 31 sec

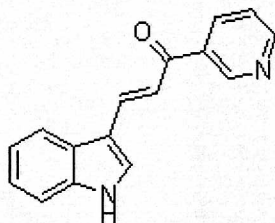

11

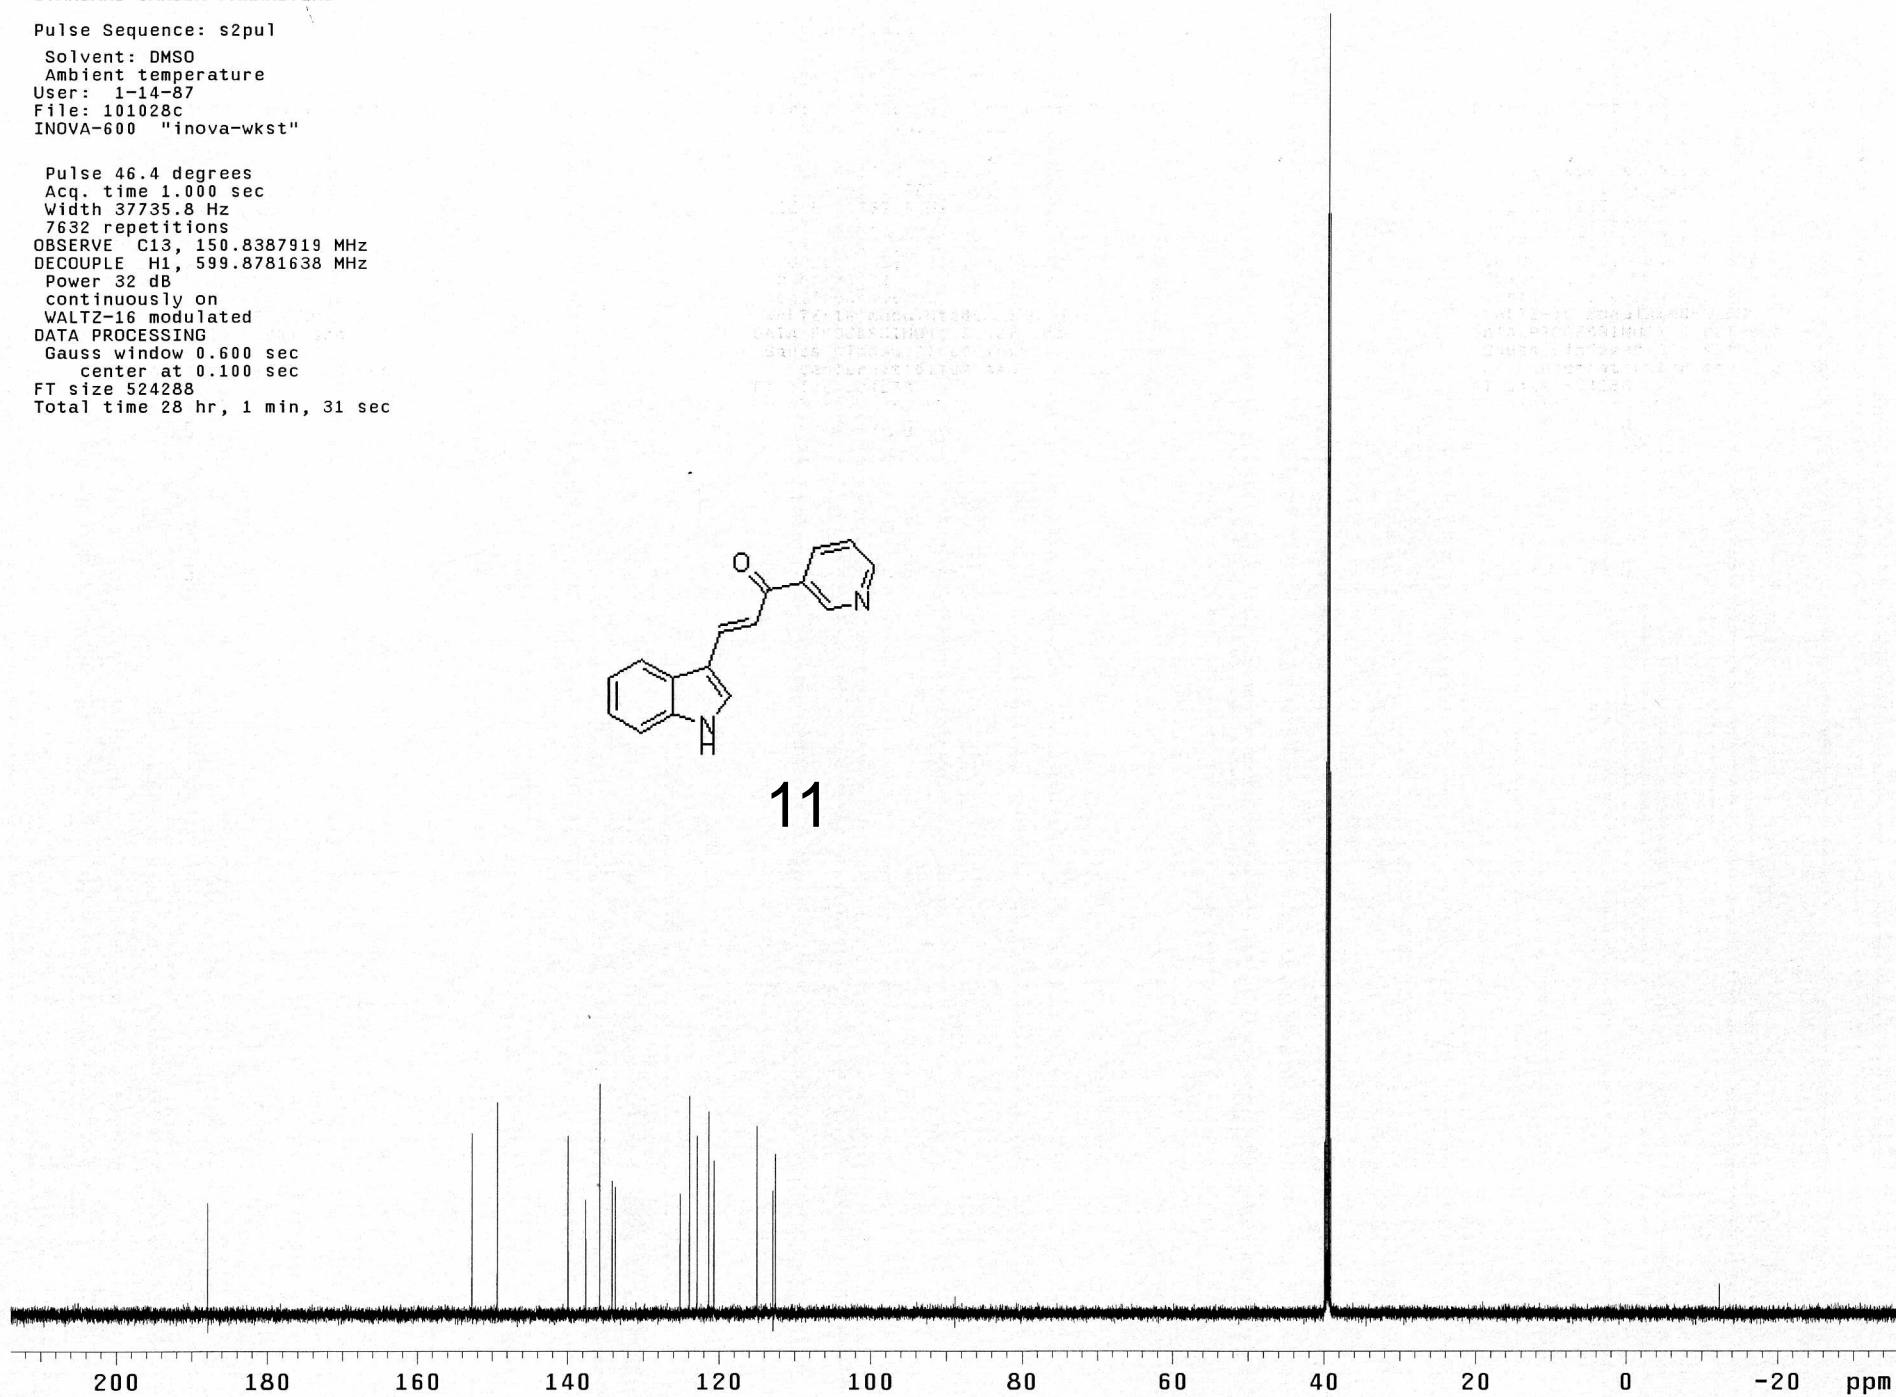

S16

STANDARD PROTON PARAMETERS

Pulse Sequence: gcosy

Solvent: DMSO

Ambient temperature

File: 101028b

INOVA-600 "inova-wkst"

Relax. delay 1.000 sec

Acq. time 0.232 sec

Width 2211.5 Hz

2D Width 2211.5 Hz

Single scan

92 increments

OBSERVE H1, 599.8751455 MHz

DATA PROCESSING

Sine bell 0.116 sec

F1 DATA PROCESSING

Sine bell 0.021 sec

FT size 1024 x 1024

Total time 1 min, 58 sec

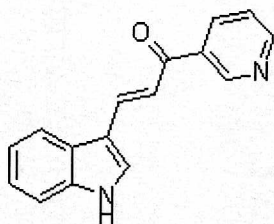

11

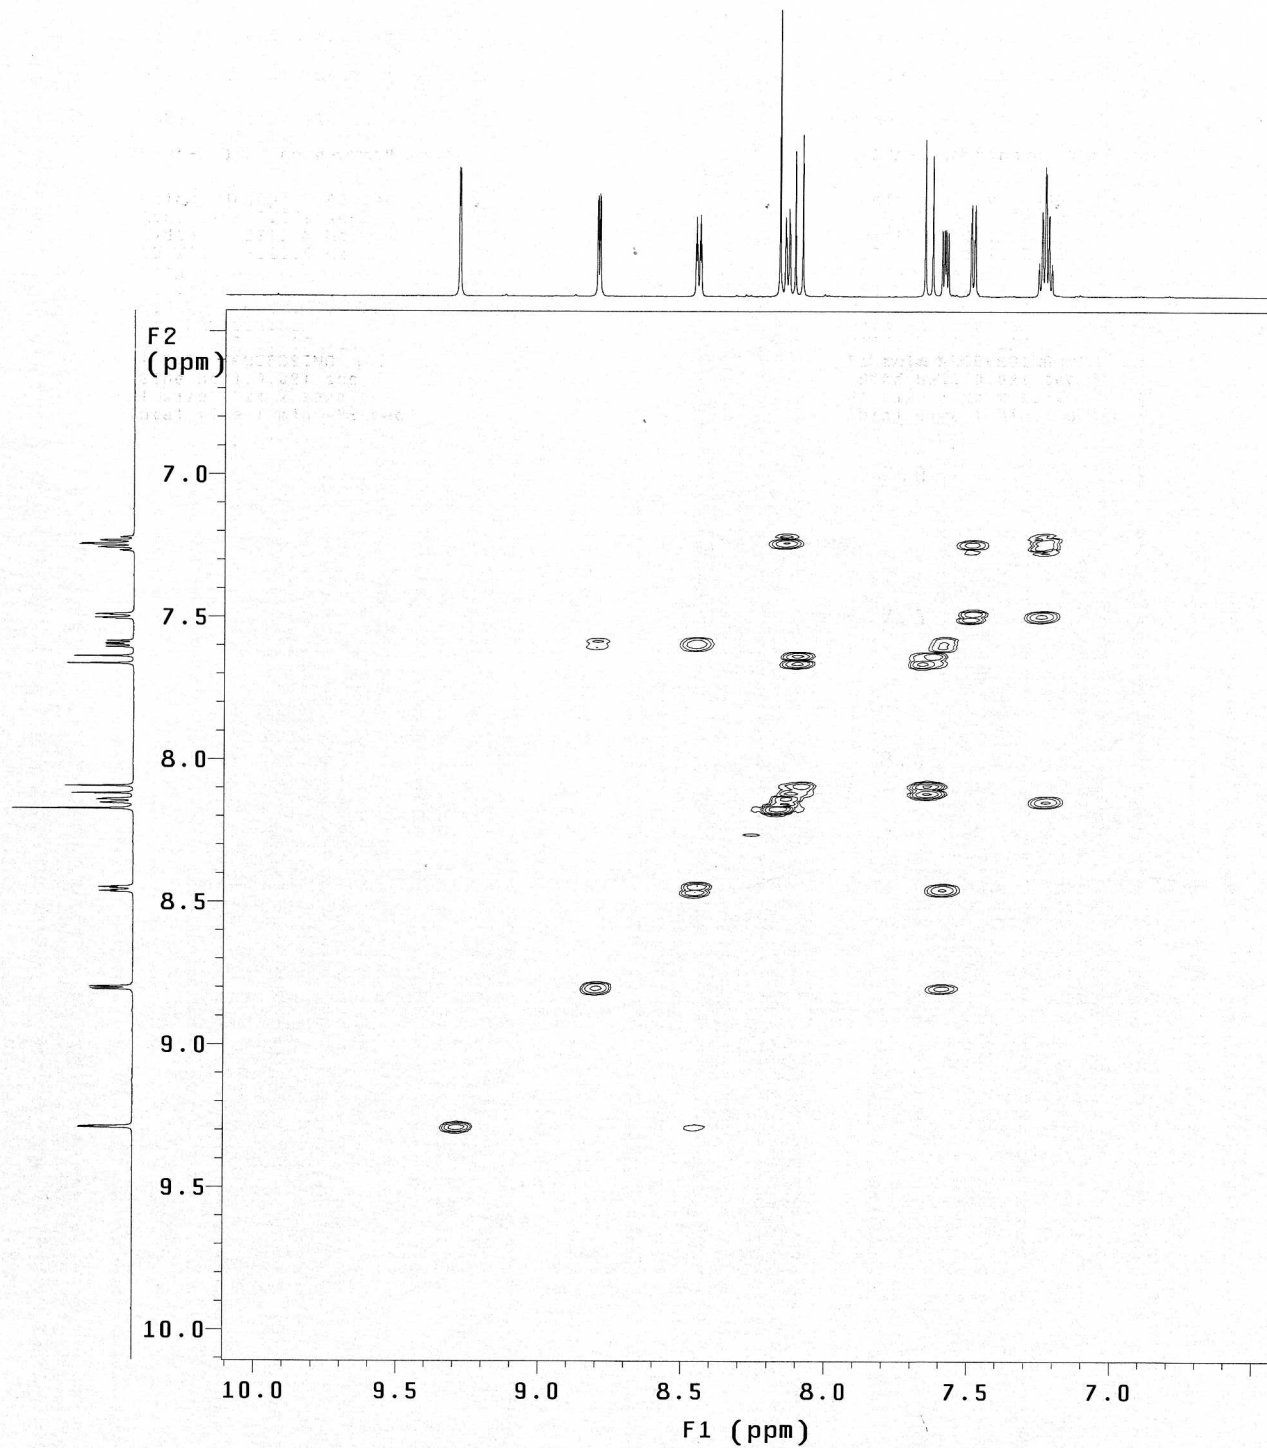



S17

STANDARD PROTON PARAMETERS

Pulse Sequence: s2pu1

Solvent: DMSO  
Ambient temperature  
File: 090930d  
GEMINI-200BB "gem2000"

Relax. delay 1.000 sec  
Pulse 30.9 degrees  
Acq. time 3.000 sec  
Width 8000.0 Hz  
16 repetitions  
OBSERVE H1, 599.8751452 MHz  
DATA PROCESSING  
Line broadening 0.4 Hz  
FT size 131072  
Total time 1 min, 10 sec

Sep 30 2009

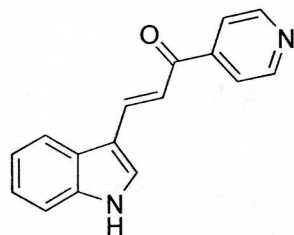

12

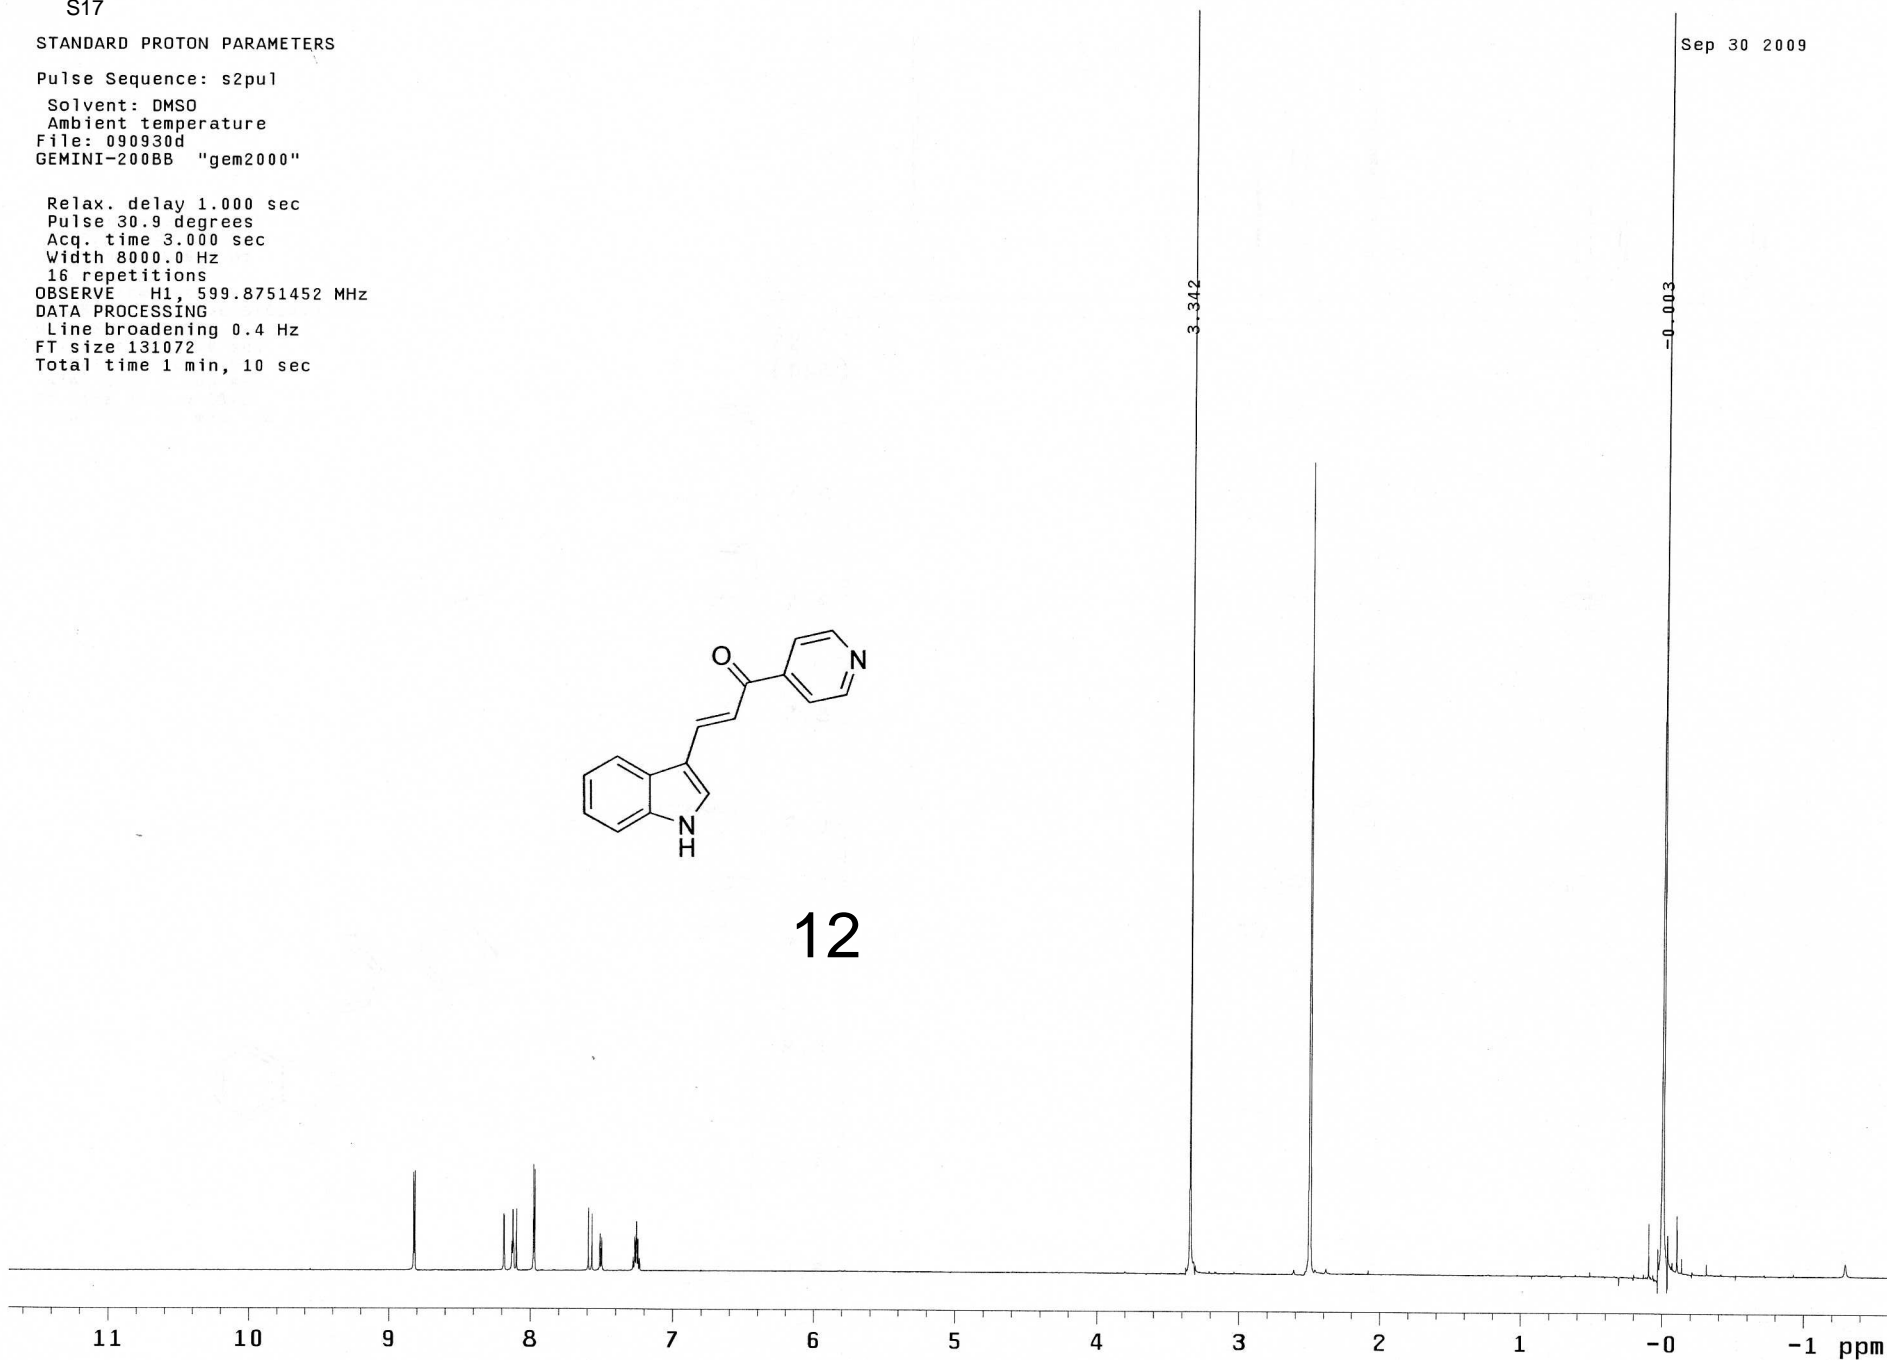

## STANDARD CARBON PARAMETERS

Pulse Sequence: s2pu1

Solvent: DMSO

Ambient temperature

User: 1-14-87

File: 091003a

GEMINI-200BB "gem2000"

Oct 3 2009

Pulse 54.9 degrees  
Acq. time 1.000 sec  
Width 37735.8 Hz  
7264 repetitions  
OBSERVE C13, 150.8387920 MHz  
DECOUPLE H1, 599.8781638 MHz  
Power 32 dB  
continuously on  
WALTZ-16 modulated  
DATA PROCESSING  
Gauss window 0.600 sec  
center at 0.100 sec  
FT size 524288  
Total time 36 hr, 47 min, 1 sec

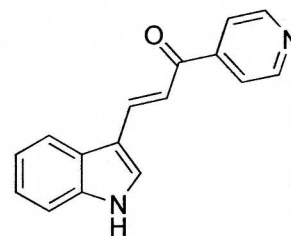

12

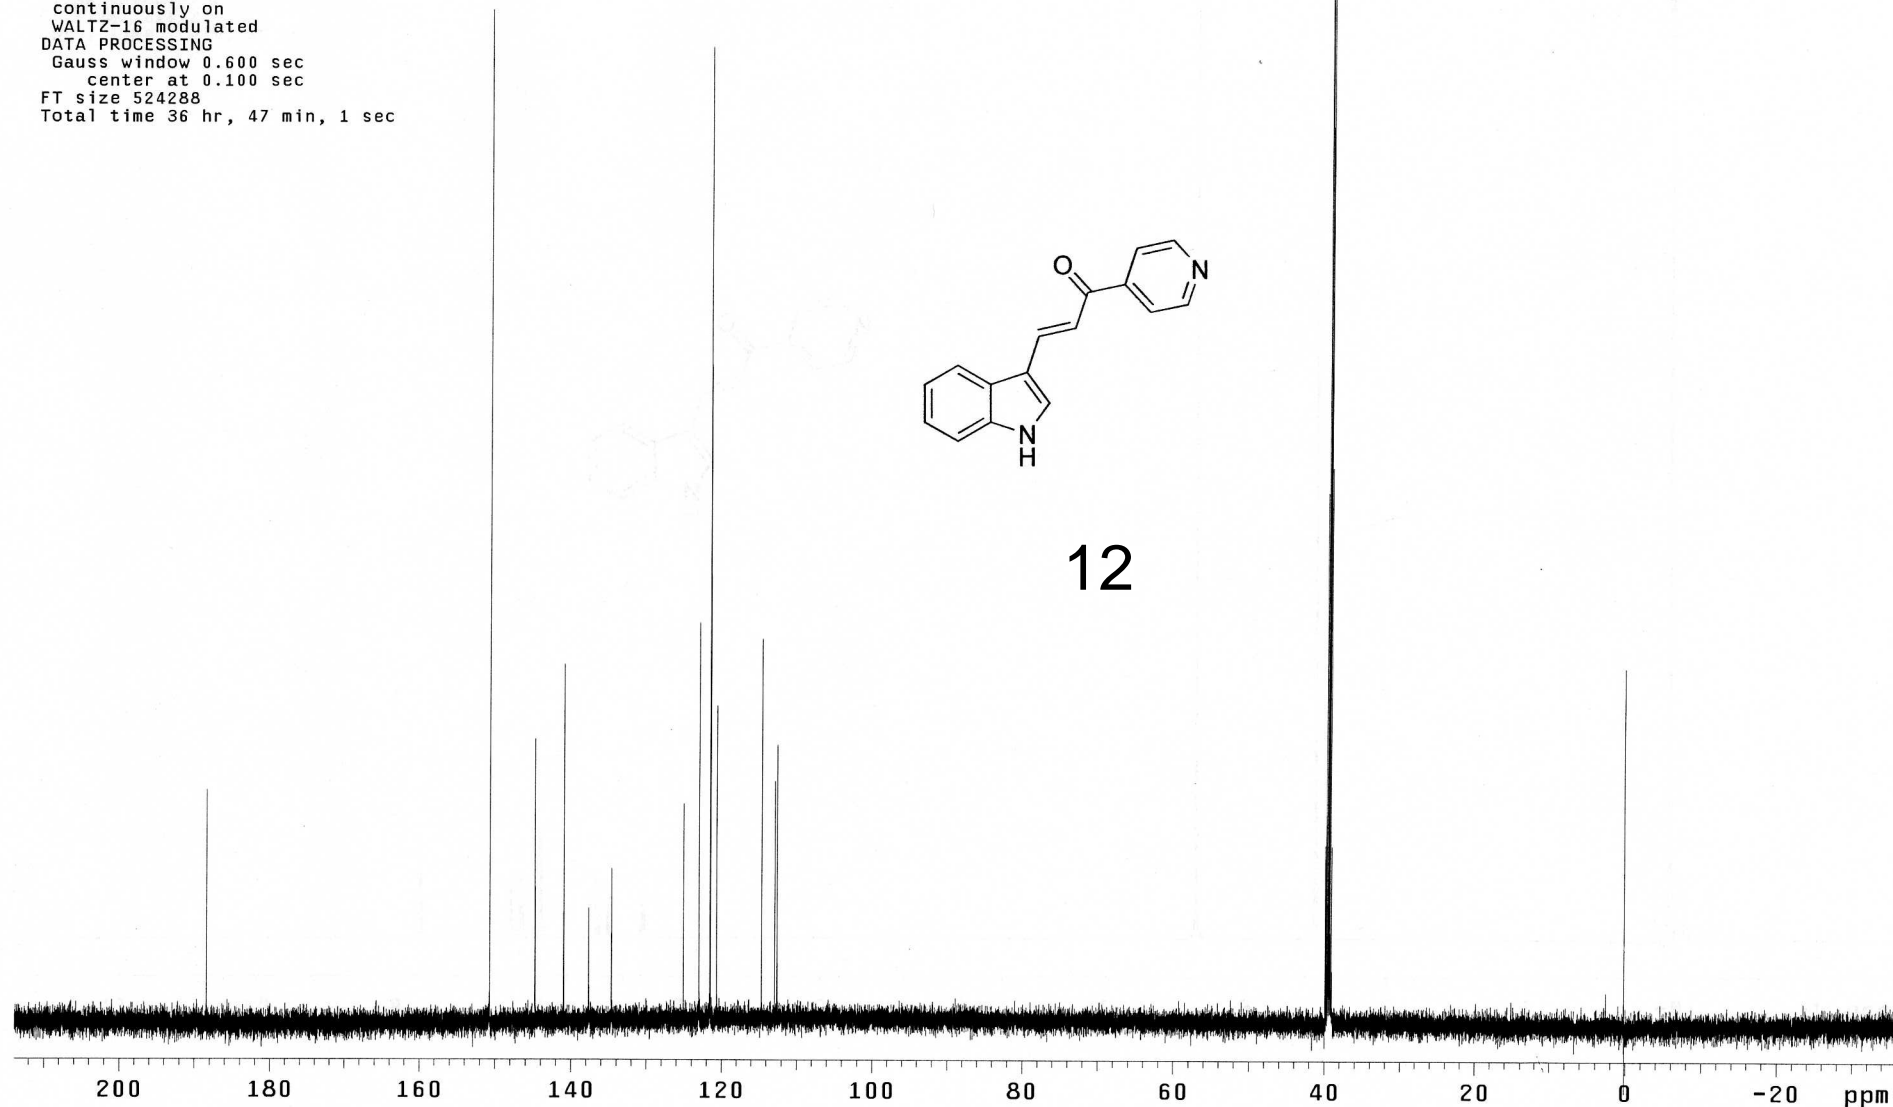

S19

STANDARD PROTON PARAMETERS

Pulse Sequence: gcosy

Solvent: DMSO

Ambient temperature

File: 090930c

GEMINI-200BB "gem2000"

Relax. delay 1.000 sec

Acq. time 0.180 sec

Width 5676.6 Hz

2D Width 5676.6 Hz

Single scan

512 increments

OBSERVE H1, 599.8751453 MHz

DATA PROCESSING

Sine bell 0.090 sec

F1 DATA PROCESSING

Sine bell 0.045 sec

FT size 2048 x 2048

Total time 13 min, 54 sec

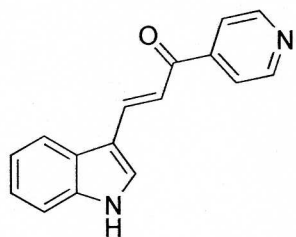

12

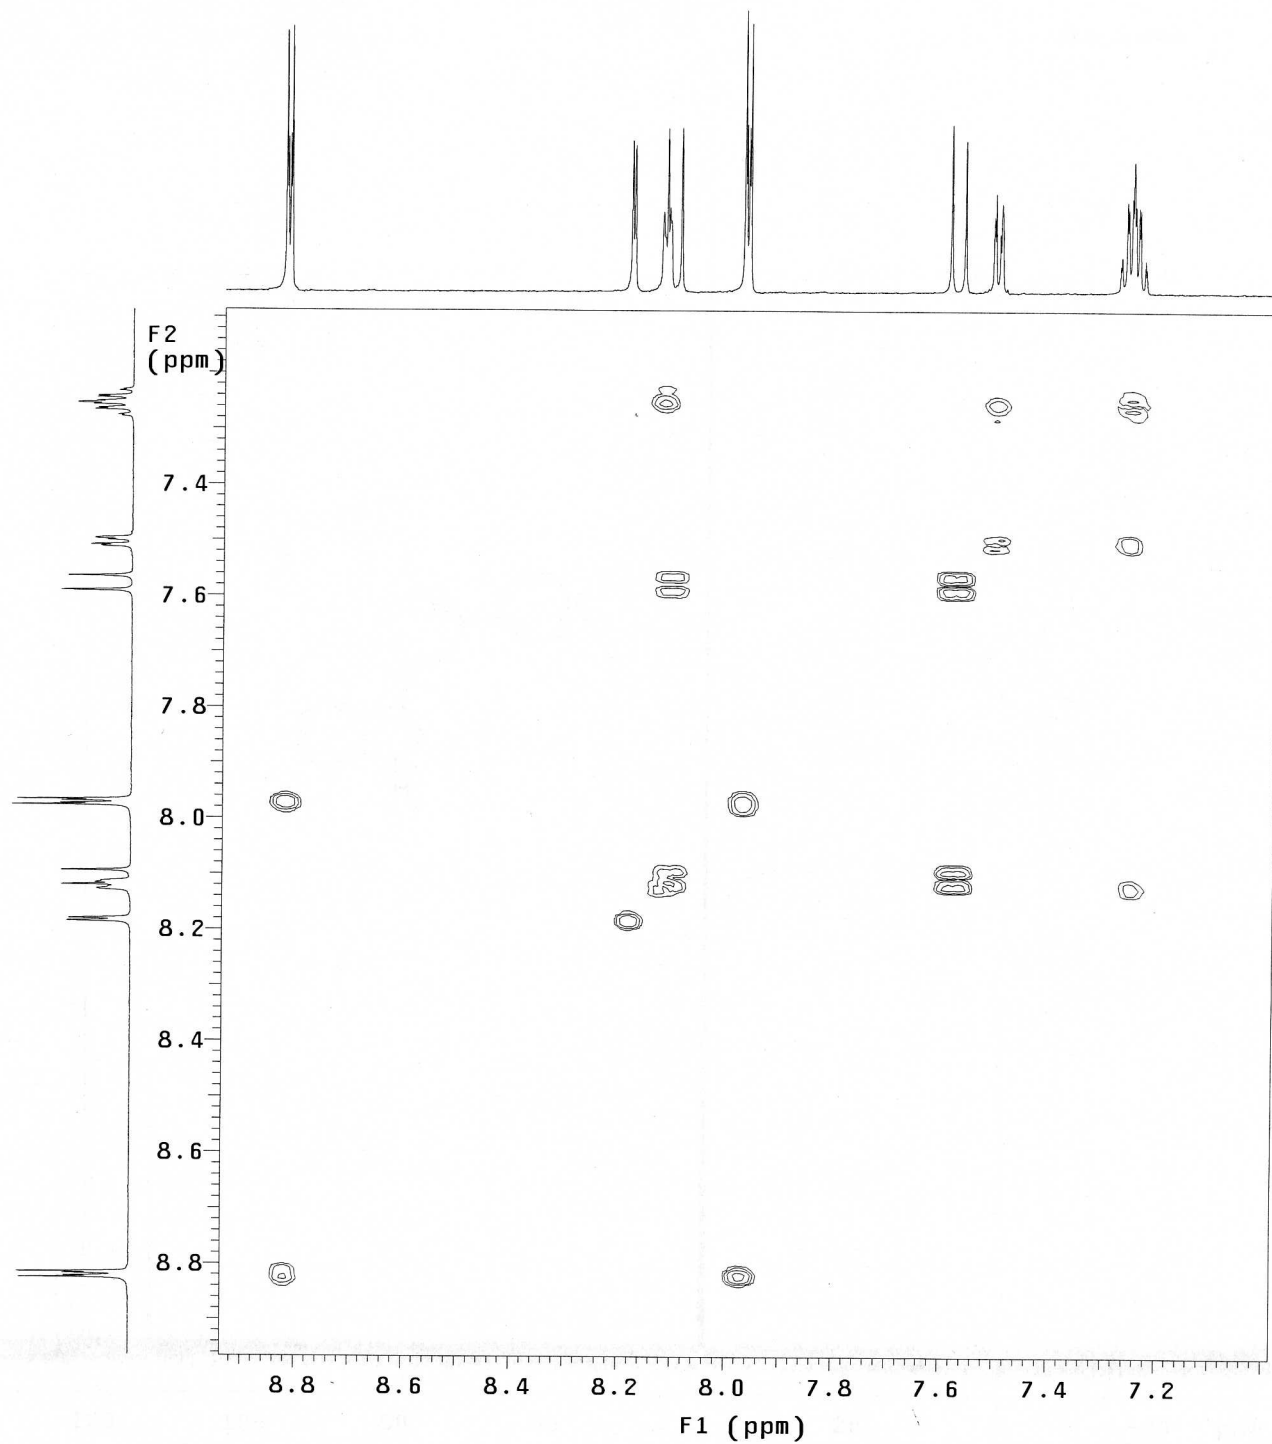

S20

STANDARD PROTON PARAMETERS

Pulse Sequence: s2pu1

Solvent: DMSO  
Ambient temperature  
File: 091004a  
GEMINI-200BB "gem2000"

Relax. delay 1.000 sec  
Pulse 30.9 degrees  
Acq. time 3.000 sec  
Width 8000.0 Hz  
16 repetitions  
OBSERVE H1, 599.8751449 MHz  
DATA PROCESSING  
Line broadening 0.4 Hz  
FT size 131072  
Total time 1 min, 10 sec

Oct 4 2009

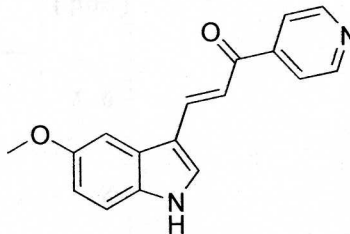

13

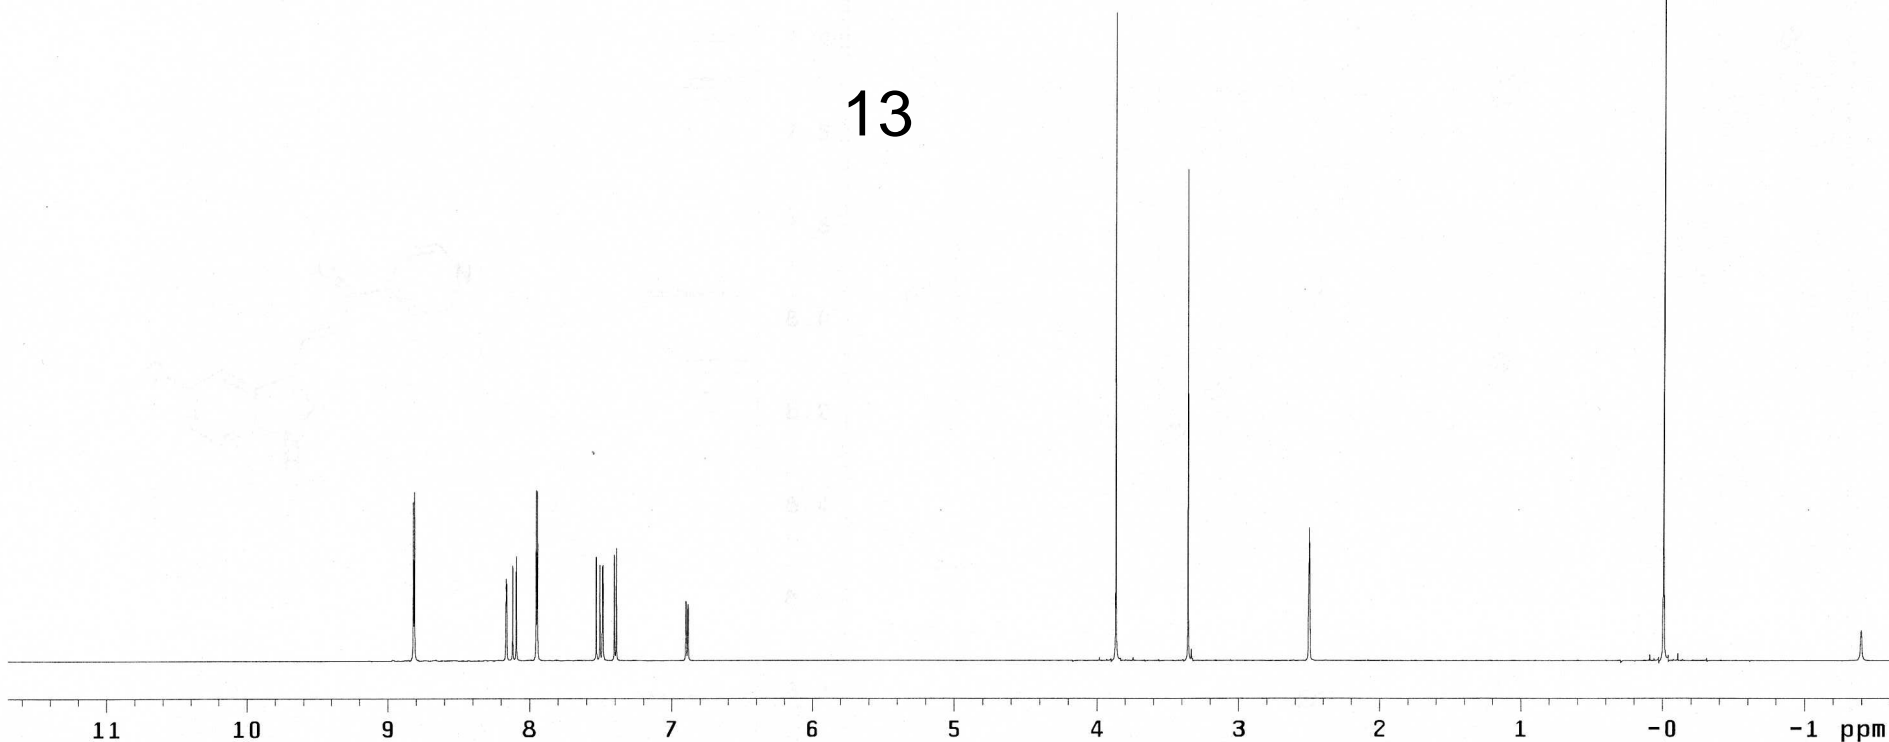

Oct 4 2009

STANDARD CARBON PARAMETERS  
S21

Pulse Sequence: s2pu1

Solvent: DMSO  
Ambient temperature

User: 1-14-87

File: 091004c

GEMINI-200BB "gem2000"

Pulse 54.9 degrees

Acq. time 1.000 sec

Width 37735.8 Hz

6064 repetitions

OBSERVE C13, 150.8387908 MHz

DECOUPLE H1, 599.8781638 MHz

Power 32 dB

continuously on

WALTZ-16 modulated

DATA PROCESSING

Gauss window 0.600 sec

center at 0.100 sec

FT size 524288

Total time 36 hr, 47 min, 1 sec

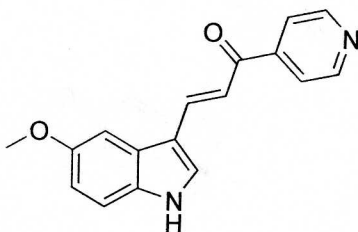

13

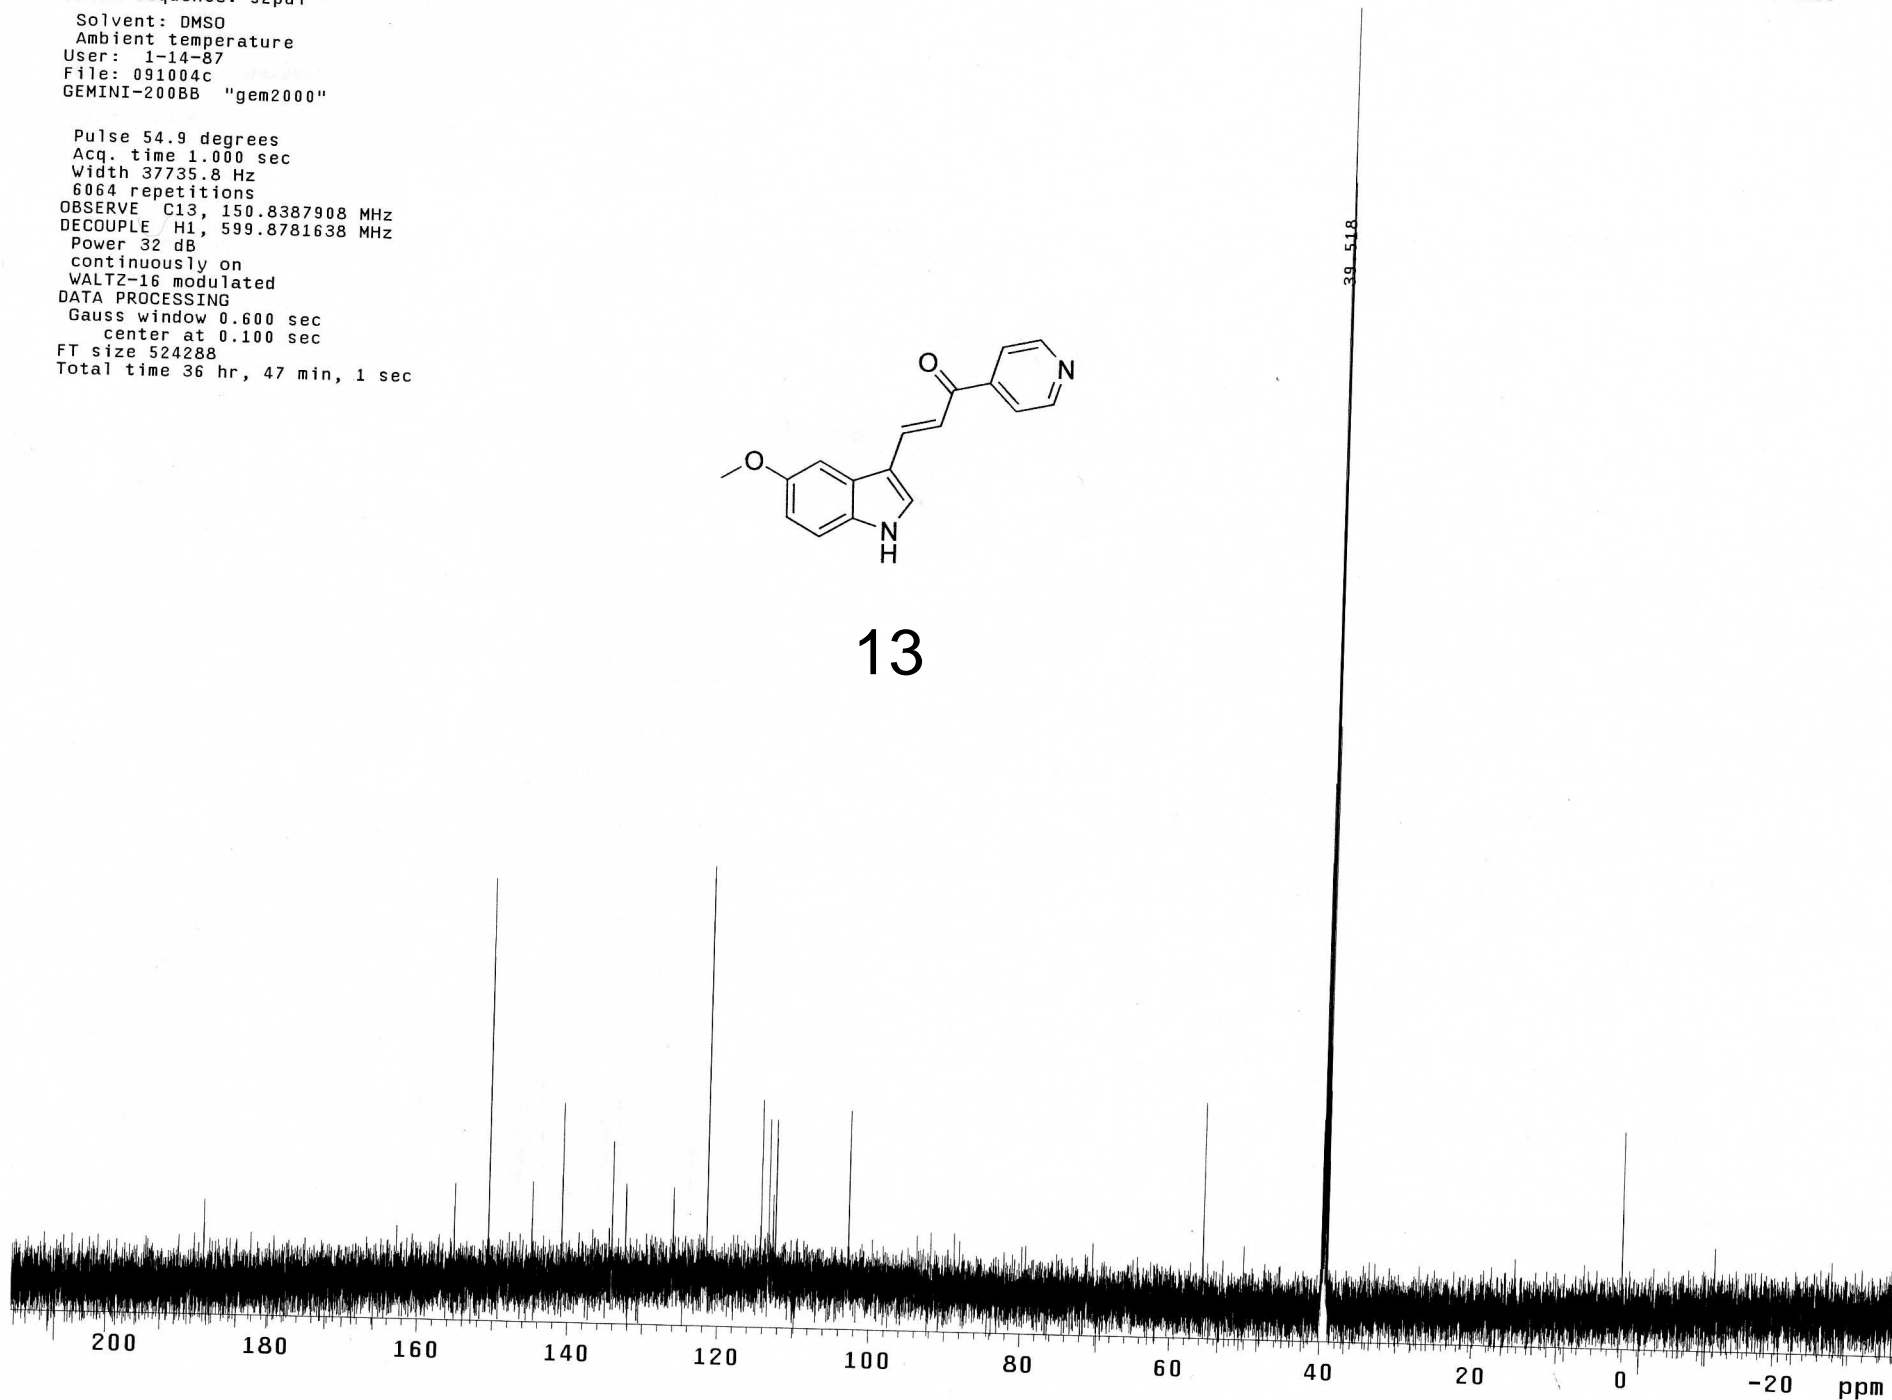

## STANDARD PROTON PARAMETERS

Pulse Sequence: gcosy

Solvent: DMSO  
Ambient temperature  
File: 091004b  
GEMINI-200BB "gem2000"

Relax. delay 1.000 sec  
Acq. time 0.207 sec  
Width 4953.9 Hz  
2D Width 4953.9 Hz  
Single scan  
512 increments  
OBSERVE H1, 599.8751449 MHz  
DATA PROCESSING  
Sine bell 0.103 sec  
F1 DATA PROCESSING  
Sine bell 0.052 sec  
FT size 2048 x 2048  
Total time 14 min, 11 sec

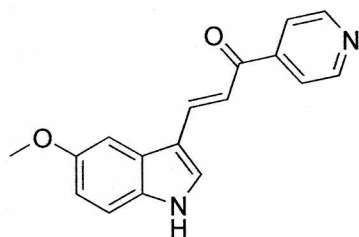

13

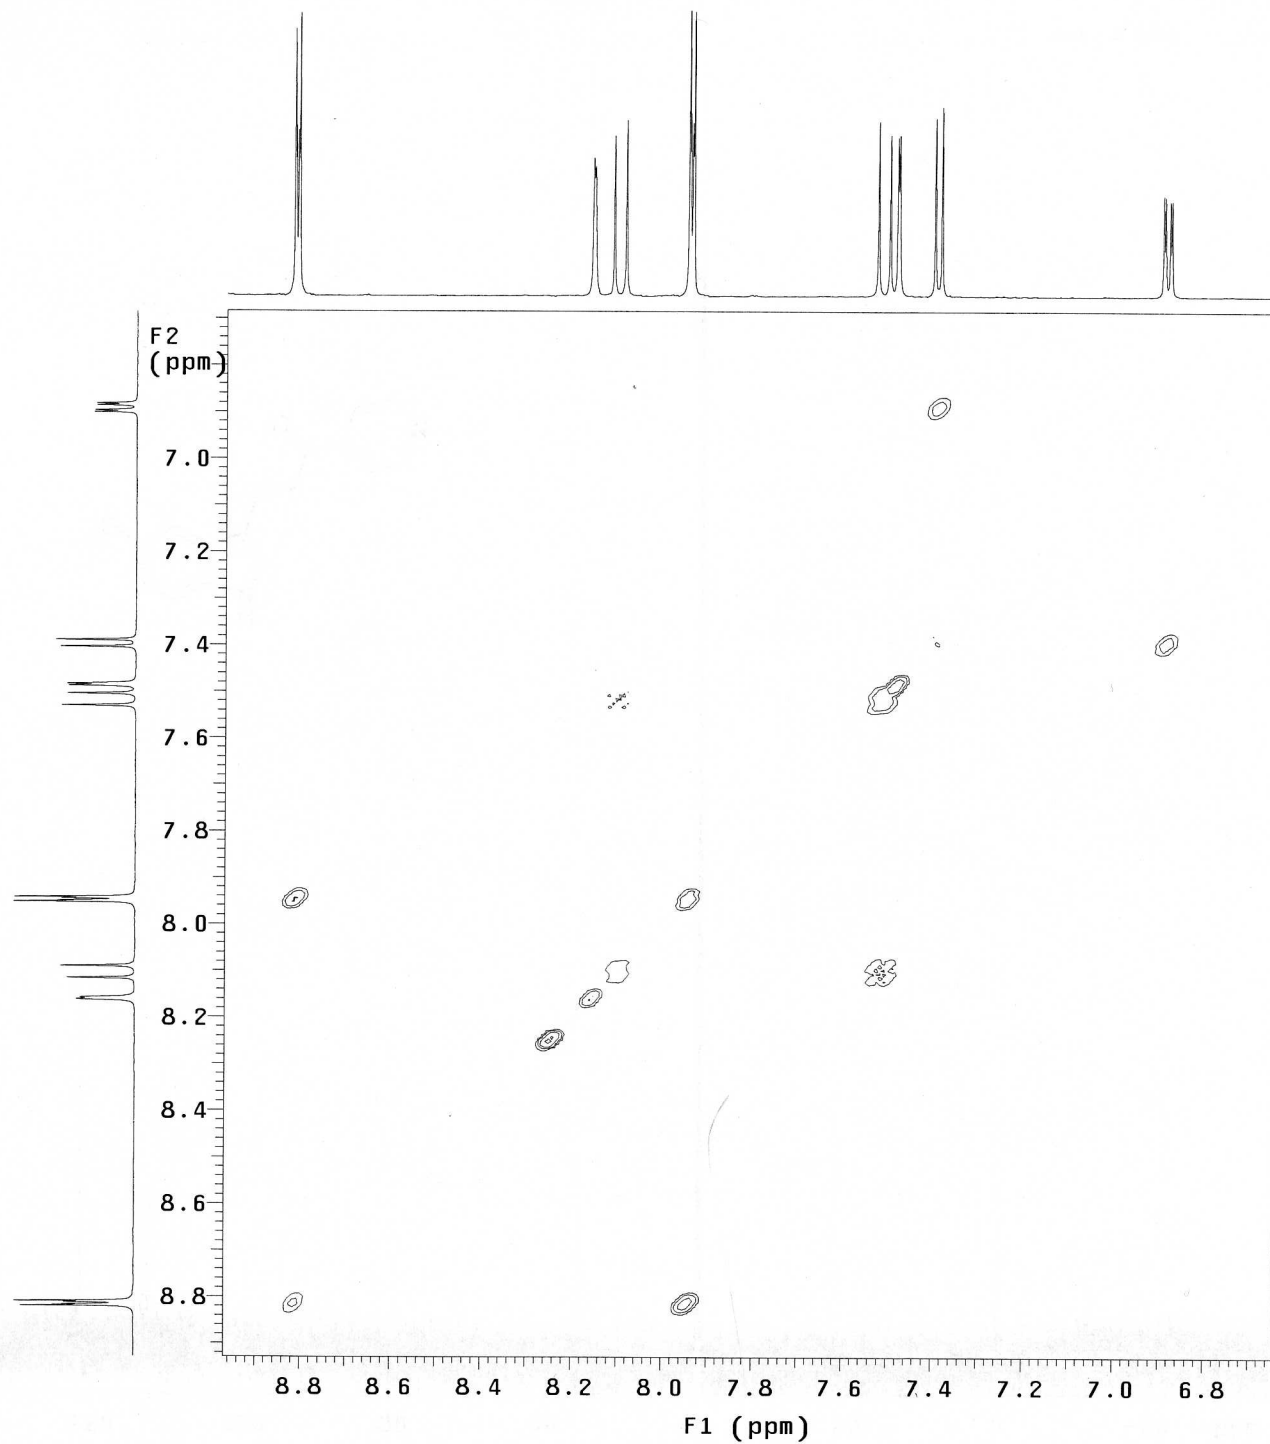

S23  
STANDARD PROTON PARAMETERS

Pulse Sequence: s2pu1  
Solvent: DMSO  
Ambient temperature  
File: 091005a  
GEMINI-200BB "gem2000"

Relax. delay 1.000 sec  
Pulse 30.9 degrees  
Acq. time 3.000 sec  
Width 8000.0 Hz  
16 repetitions  
OBSERVE H1, 599.8751449 MHz  
DATA PROCESSING  
Line broadening 0.4 Hz  
FT size 131072  
Total time 1 min, 10 sec

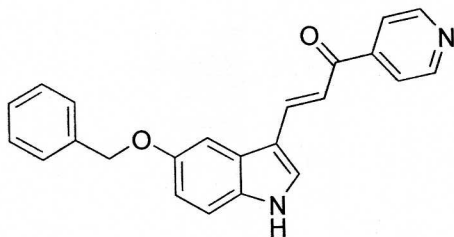

14

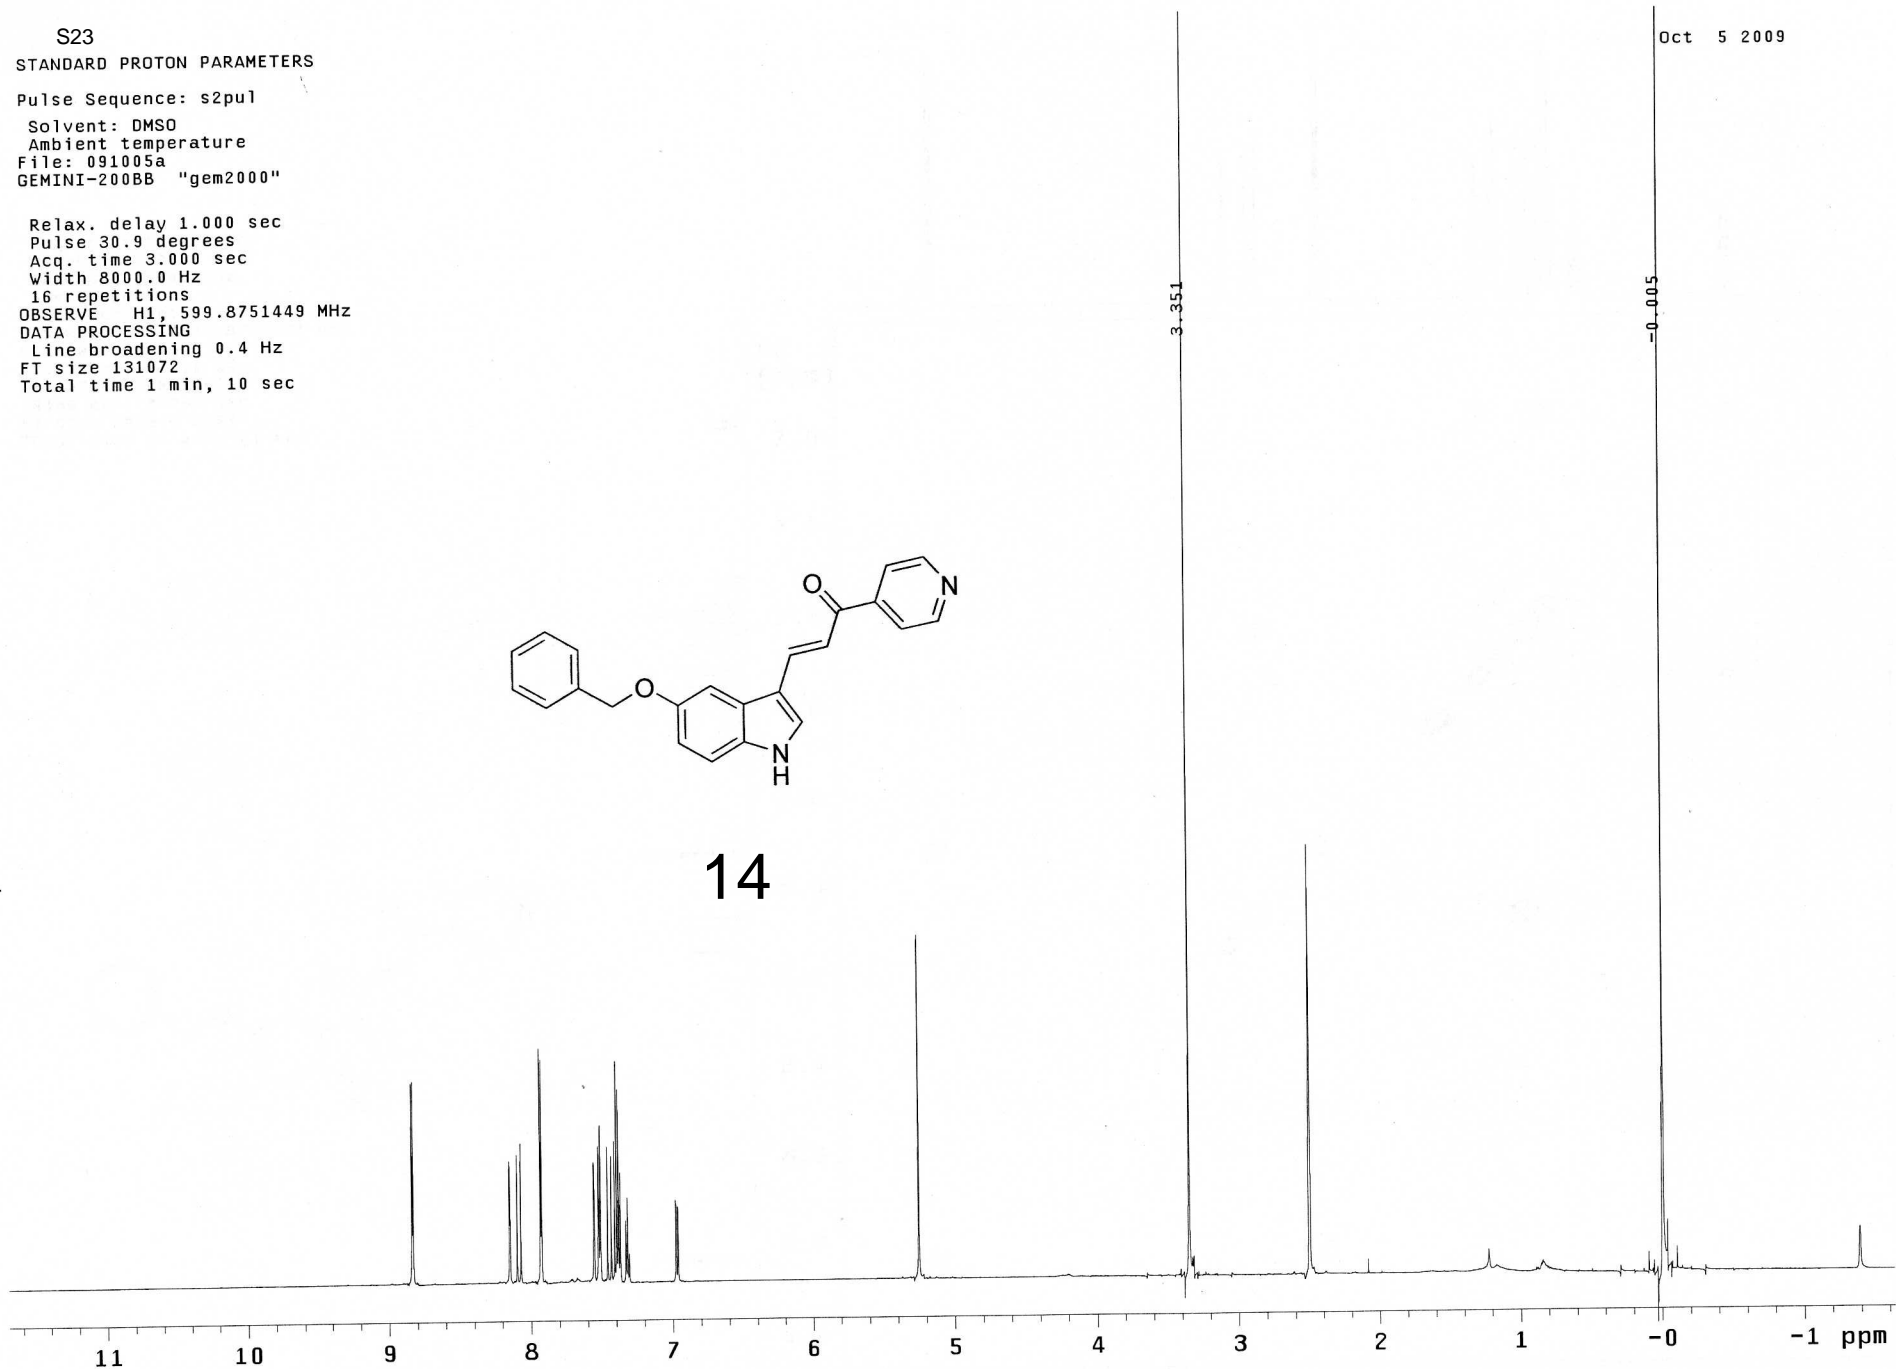

091006a

S24

13C NMR

mwr-1-4b

Oct 5 2009

STANDARD CARBON PARAMETERS

Pulse Sequence: s2pul

Solvent: DMSO

Ambient temperature

User: 1-14-87

INOVA-600 "inova600"

Pulse 54.9 degrees

Acq. time 1.000 sec

Width 37735.8 Hz

40912 repetitions

OBSERVE C13, 150.8387914 MHz

DECOUPLE H1, 599.8781638 MHz

Power 32 dB

continuously on

WALTZ-16 modulated

DATA PROCESSING

Gauss window 0.600 sec

center at 0.100 sec

FT size 524288

Total time 28 hr, 1 min, 31 sec

23 C  
19 unique C

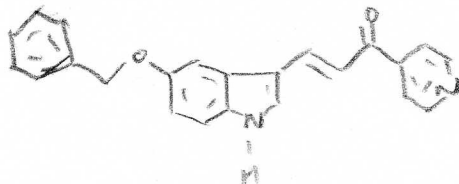

14

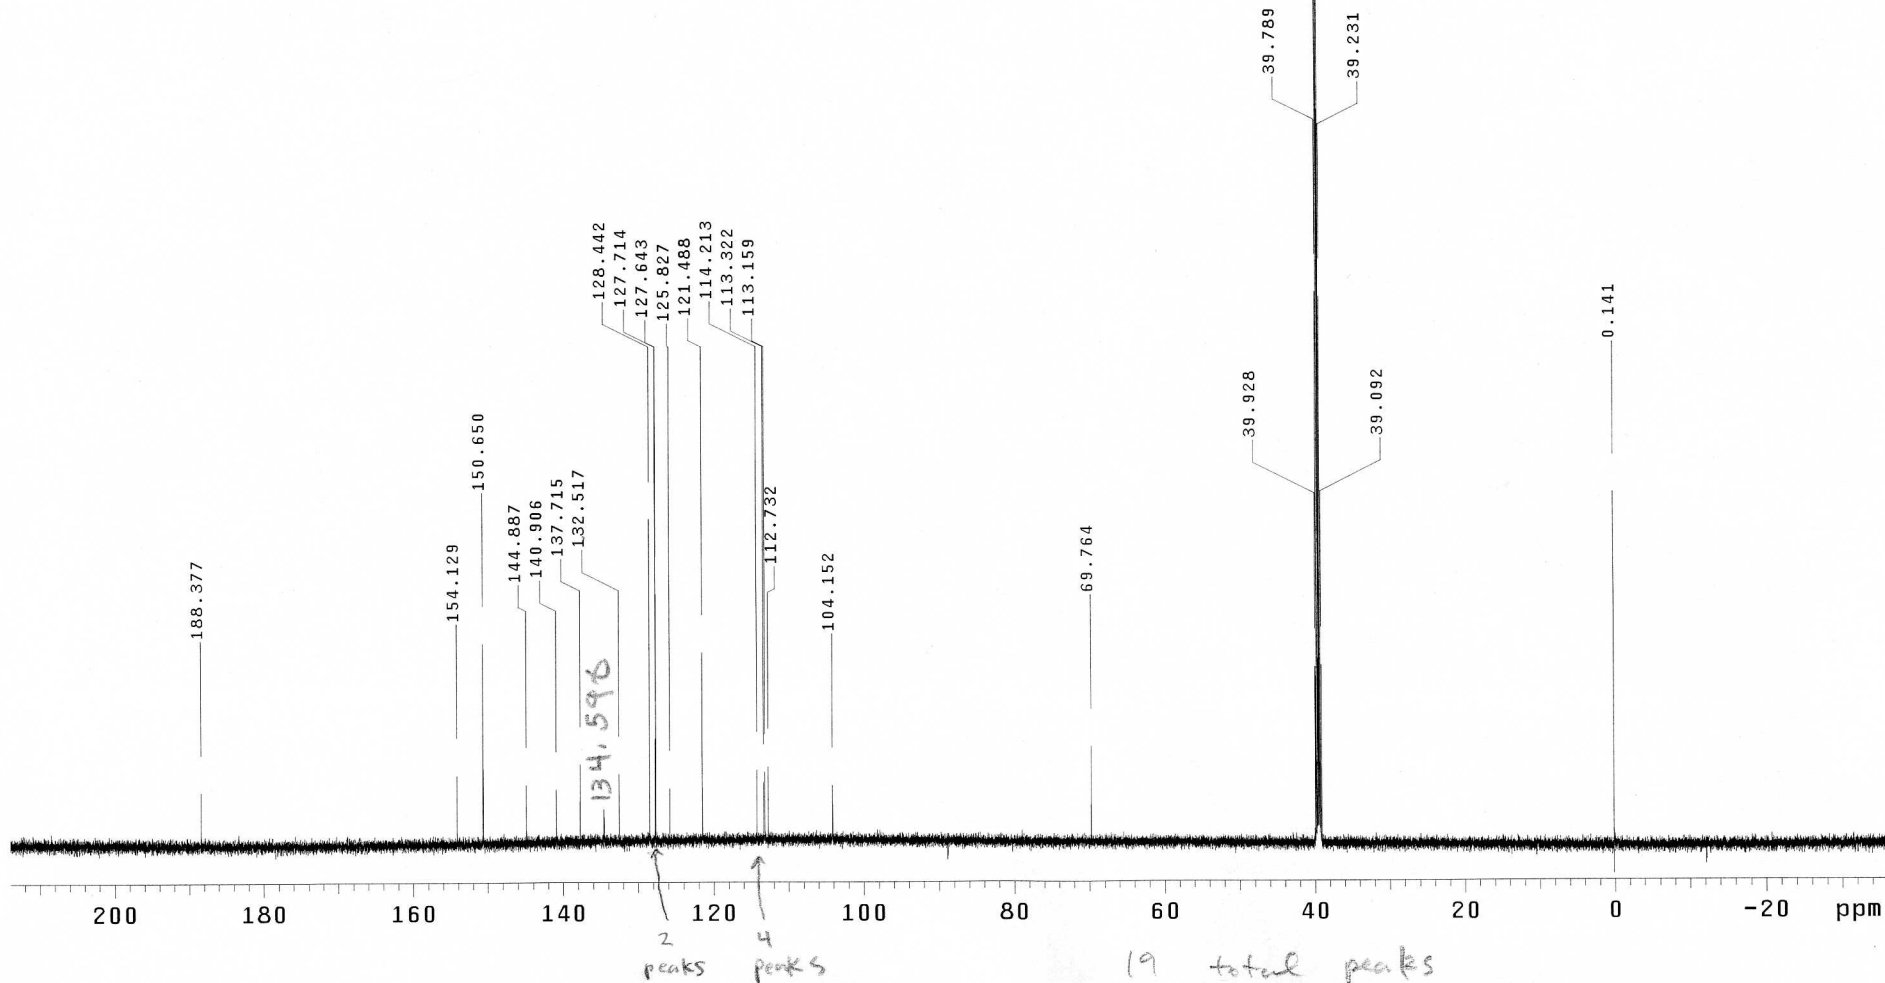



S25

STANDARD PROTON PARAMETERS

Pulse Sequence: gcosy

Solvent: DMSO

Ambient temperature

File: 091005b

GEMINI-200BB "gem2000"

Relax. delay 1.000 sec

Acq. time 0.223 sec

Width 4594.0 Hz

2D Width 4594.0 Hz

Single scan

512 increments

OBSERVE H1, 599.8751449 MHz

DATA PROCESSING

Sine bell 0.111 sec

F1 DATA PROCESSING

Sine bell 0.056 sec

FT size 2048 x 2048

Total time 14 min, 21 sec

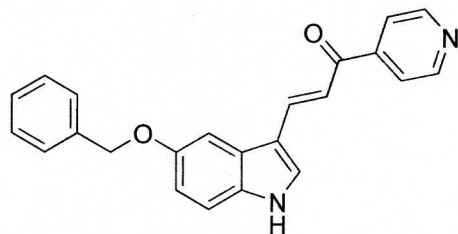

14

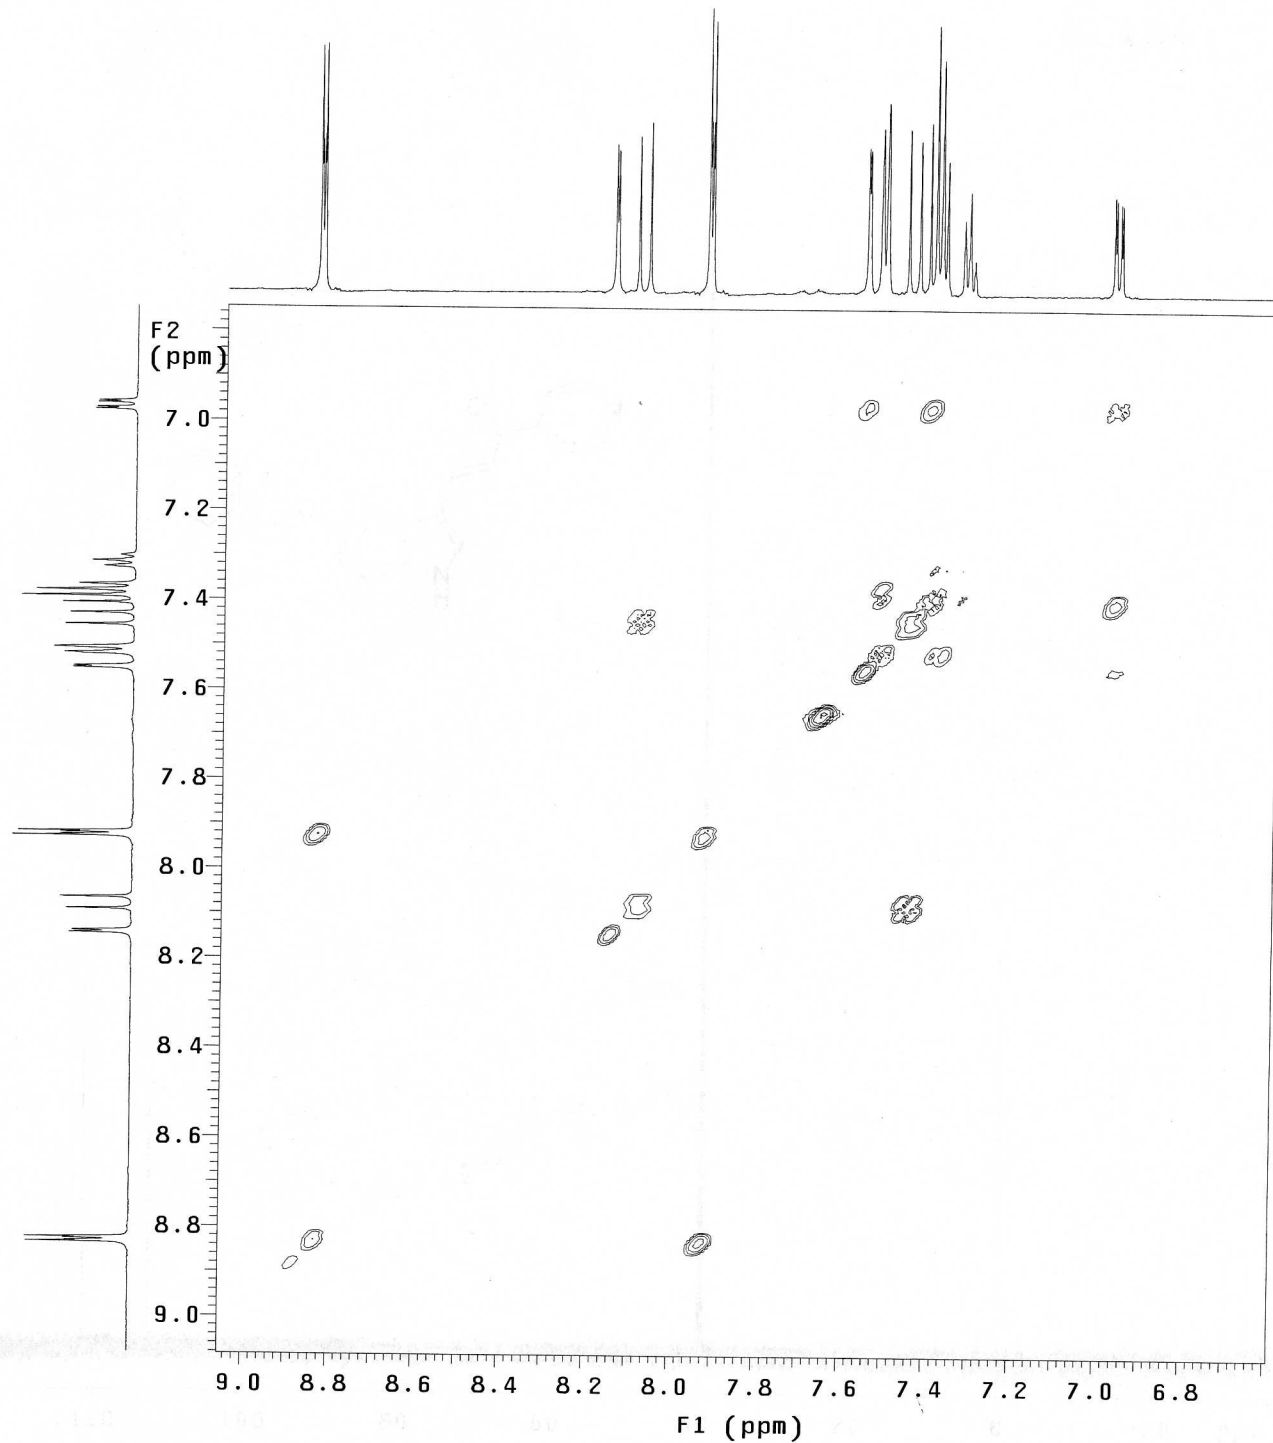

S26  
STANDARD PROTON PARAMETERS

Pulse Sequence: s2pu1

Solvent: DMSO  
Ambient temperature  
File: 091222d  
INOVA-600 "inova-wkst"

Relax. delay 1.000 sec  
Pulse 31.8 degrees  
Acq. time 3.000 sec  
Width 8999.9 Hz  
16 repetitions  
OBSERVE H1, 599.8751465 MHz  
DATA PROCESSING  
Line broadening 0.4 Hz  
FT size 131072  
Total time 1 min, 4 sec

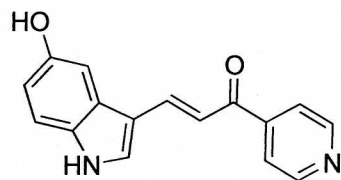

15

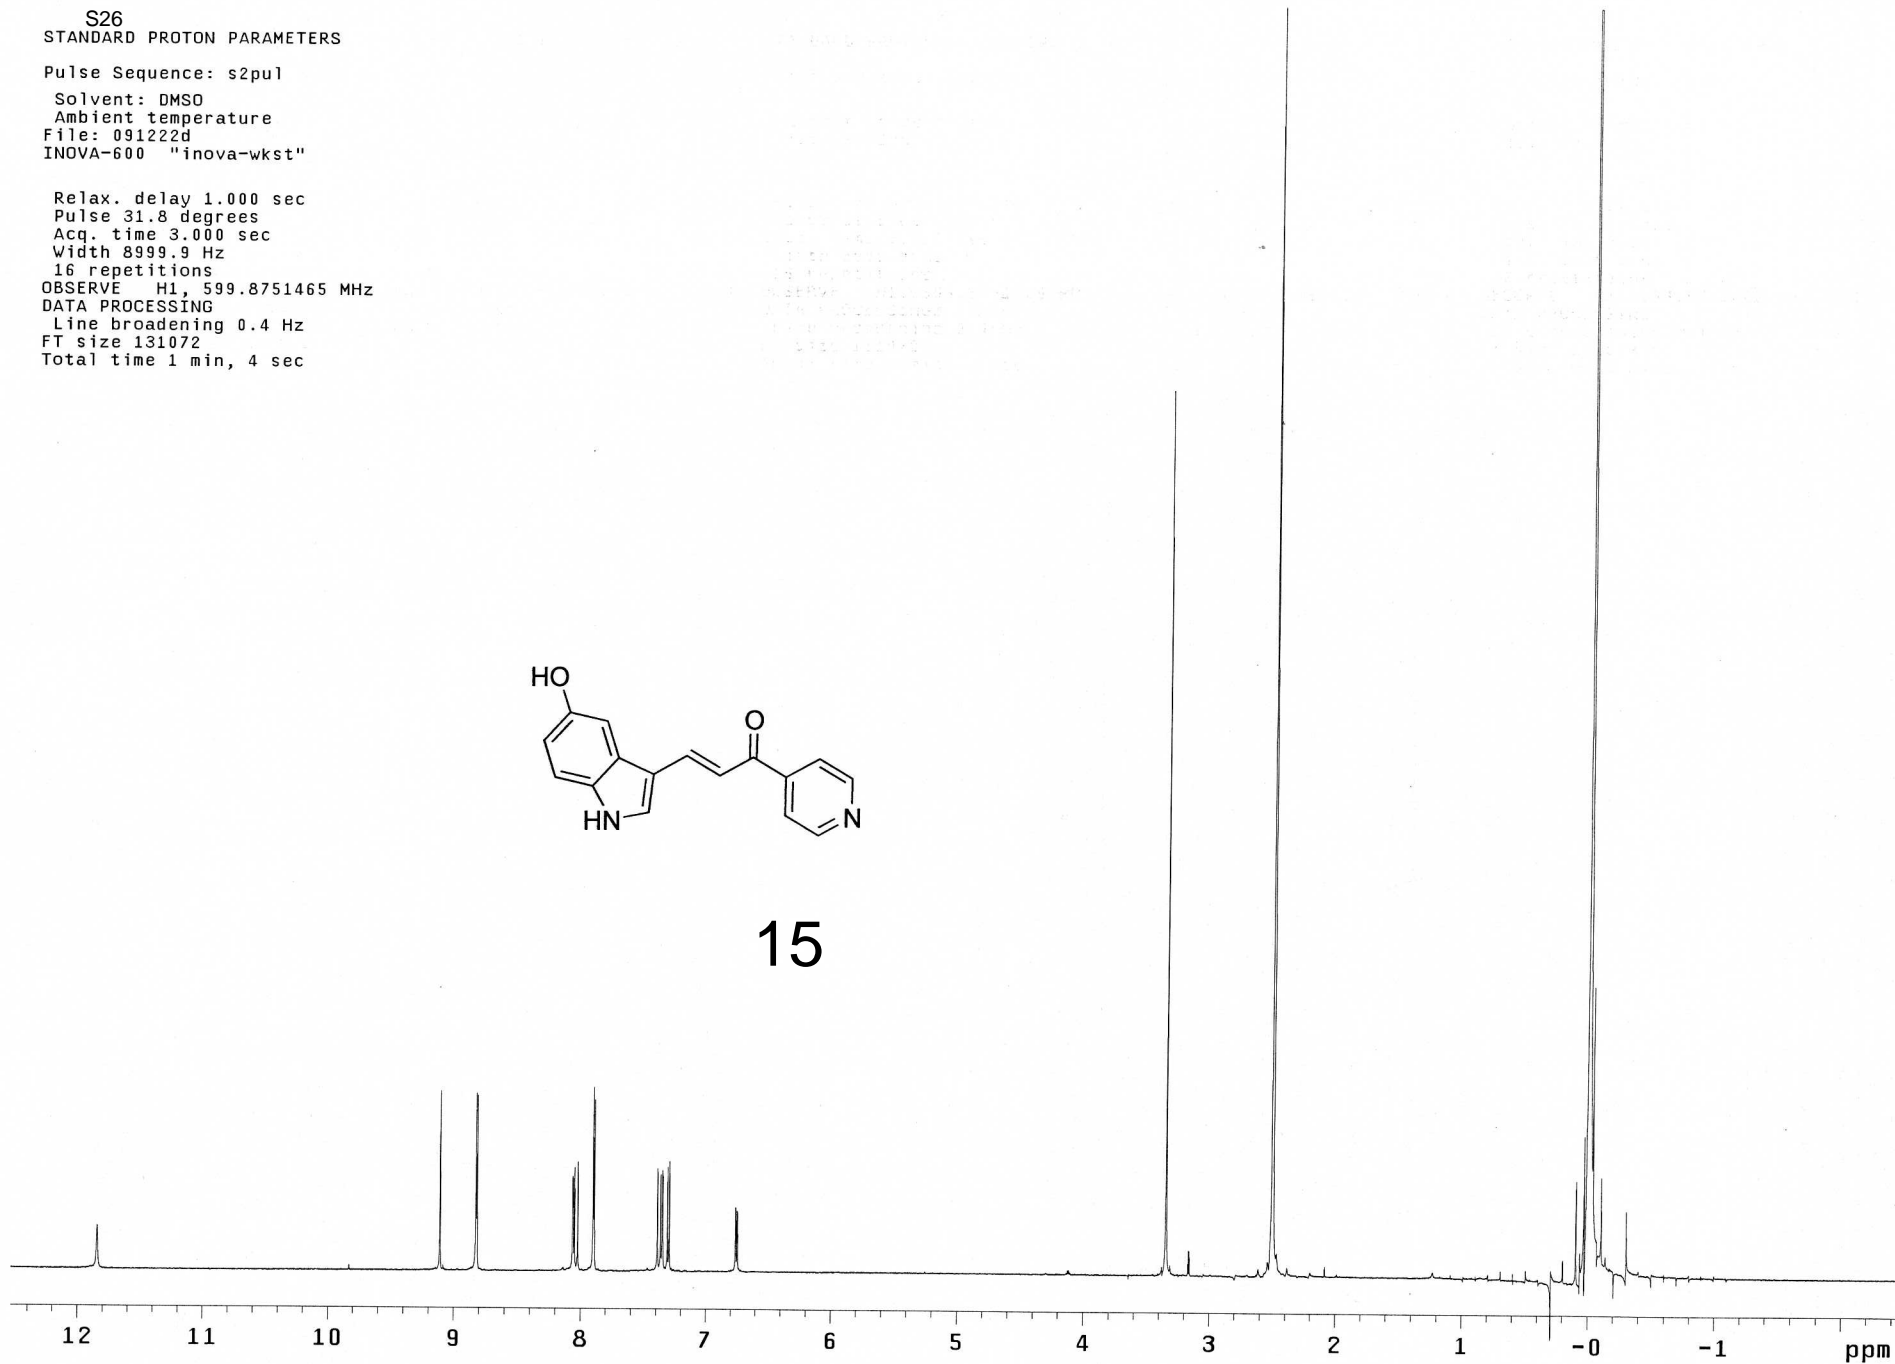

13C OBSERVE  
S27

Feb 4 2010

Pulse Sequence: s2pu1

Solvent: DMSO  
Ambient temperature  
UNITY-400 "vxrs400"

Relax. delay 0.100 sec  
Pulse 60.6 degrees  
Acq. time 1.205 sec  
Width 27192.4 Hz  
4544 repetitions  
OBSERVE C13, 100.5676993 MHz  
DECOUPLE H1, 399.9530039 MHz  
Low power 3 dB atten.  
continuously on  
WALTZ-16 modulated  
DATA PROCESSING  
Line broadening 0.5 Hz  
Gauss window 0.500 sec  
center at 0.100 sec  
FT size 131072  
Total time 3 hr, 39 min, 18 sec

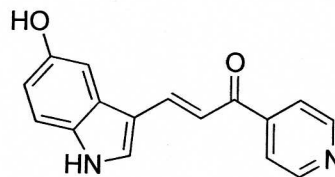

15

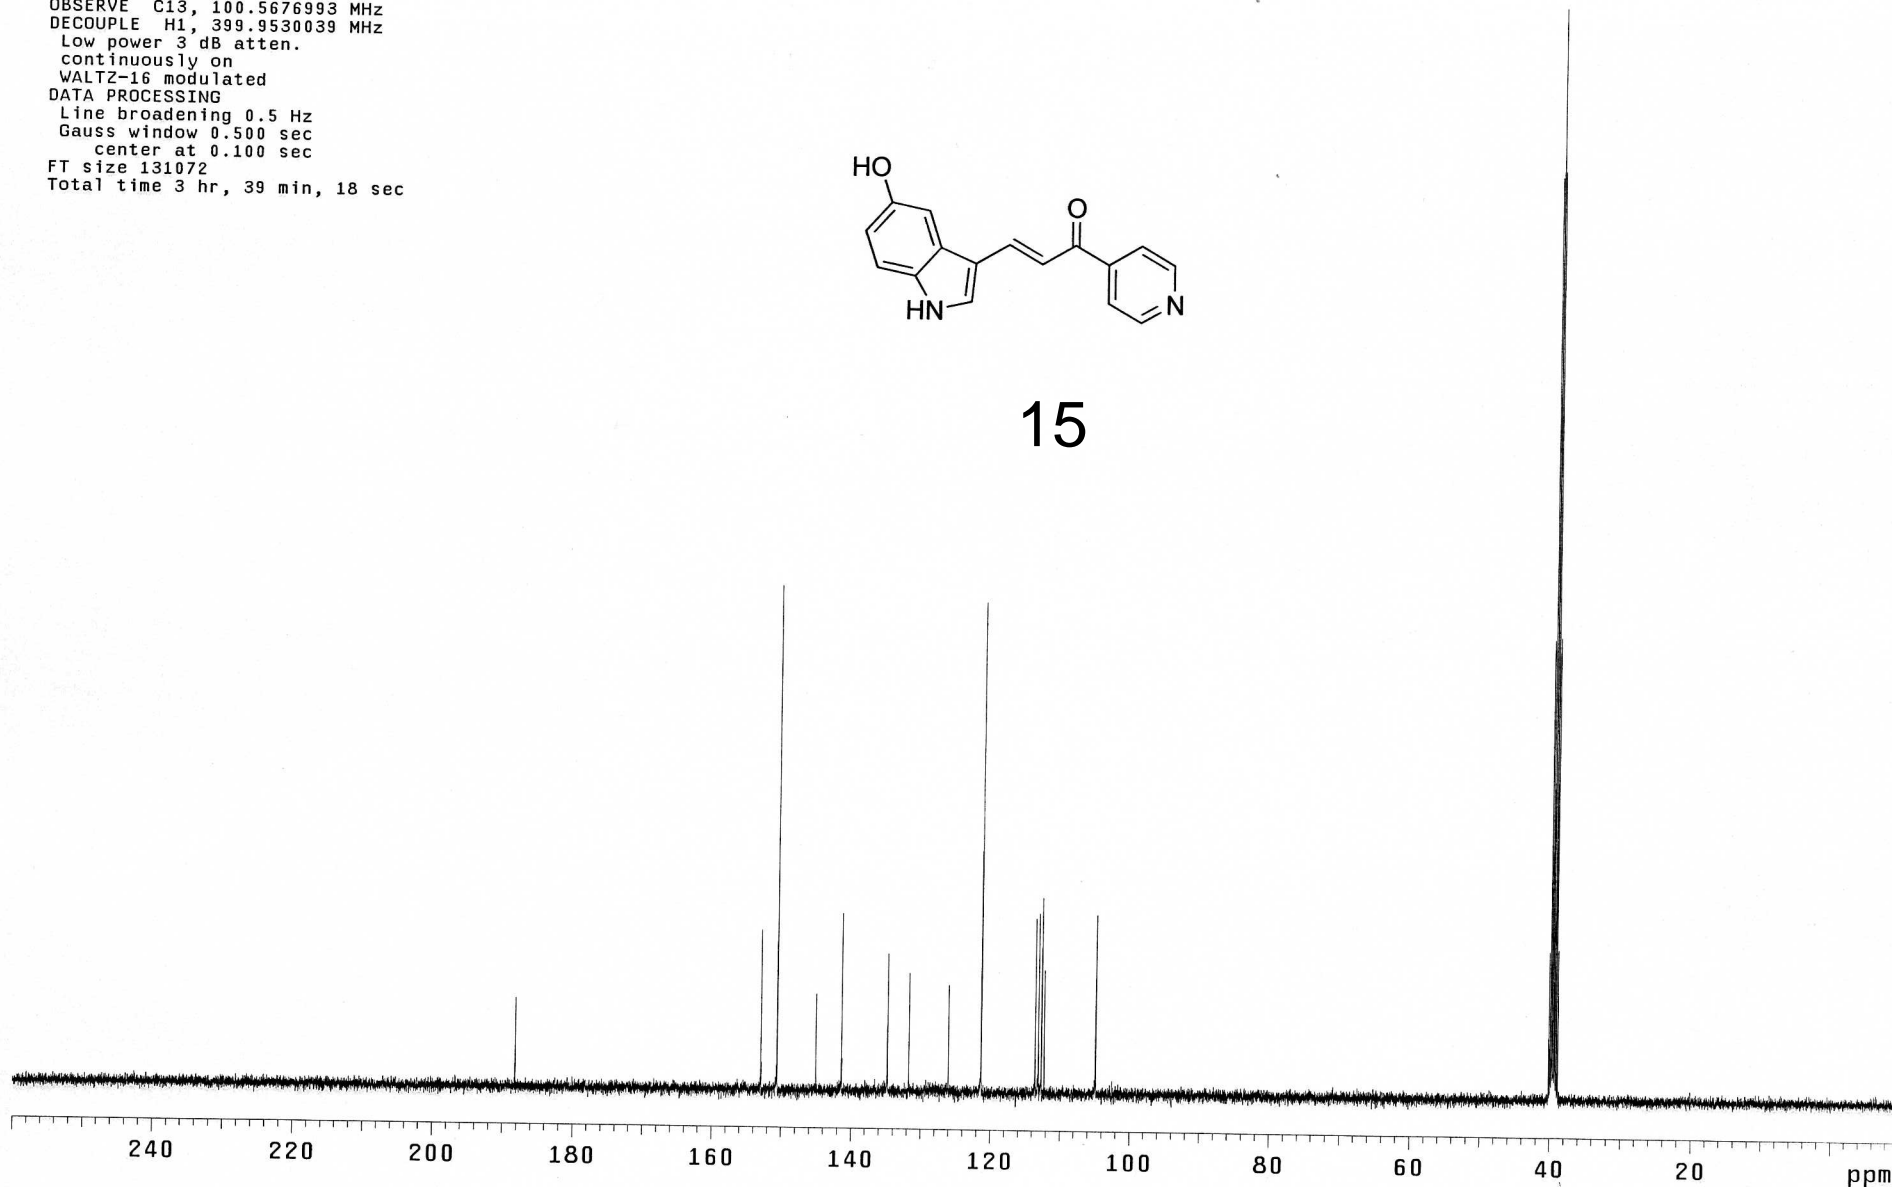

S28

STANDARD PROTON PARAMETERS

Pulse Sequence: gcosy

Solvent: DMSO  
Ambient temperature  
File: 091028b  
INOVA-600 "inova-wkst"

Relax. delay 1.000 sec  
Acq. time 0.150 sec  
Width 6832.9 Hz  
2D Width 6832.9 Hz  
Single scan  
512 increments  
OBSERVE H1, 599.8751449 MHz  
DATA PROCESSING  
Sine bell 0.075 sec  
F1 DATA PROCESSING  
Sine bell 0.037 sec  
FT size 2048 x 2048  
Total time 10 min, 17 sec

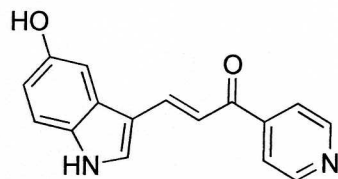

15

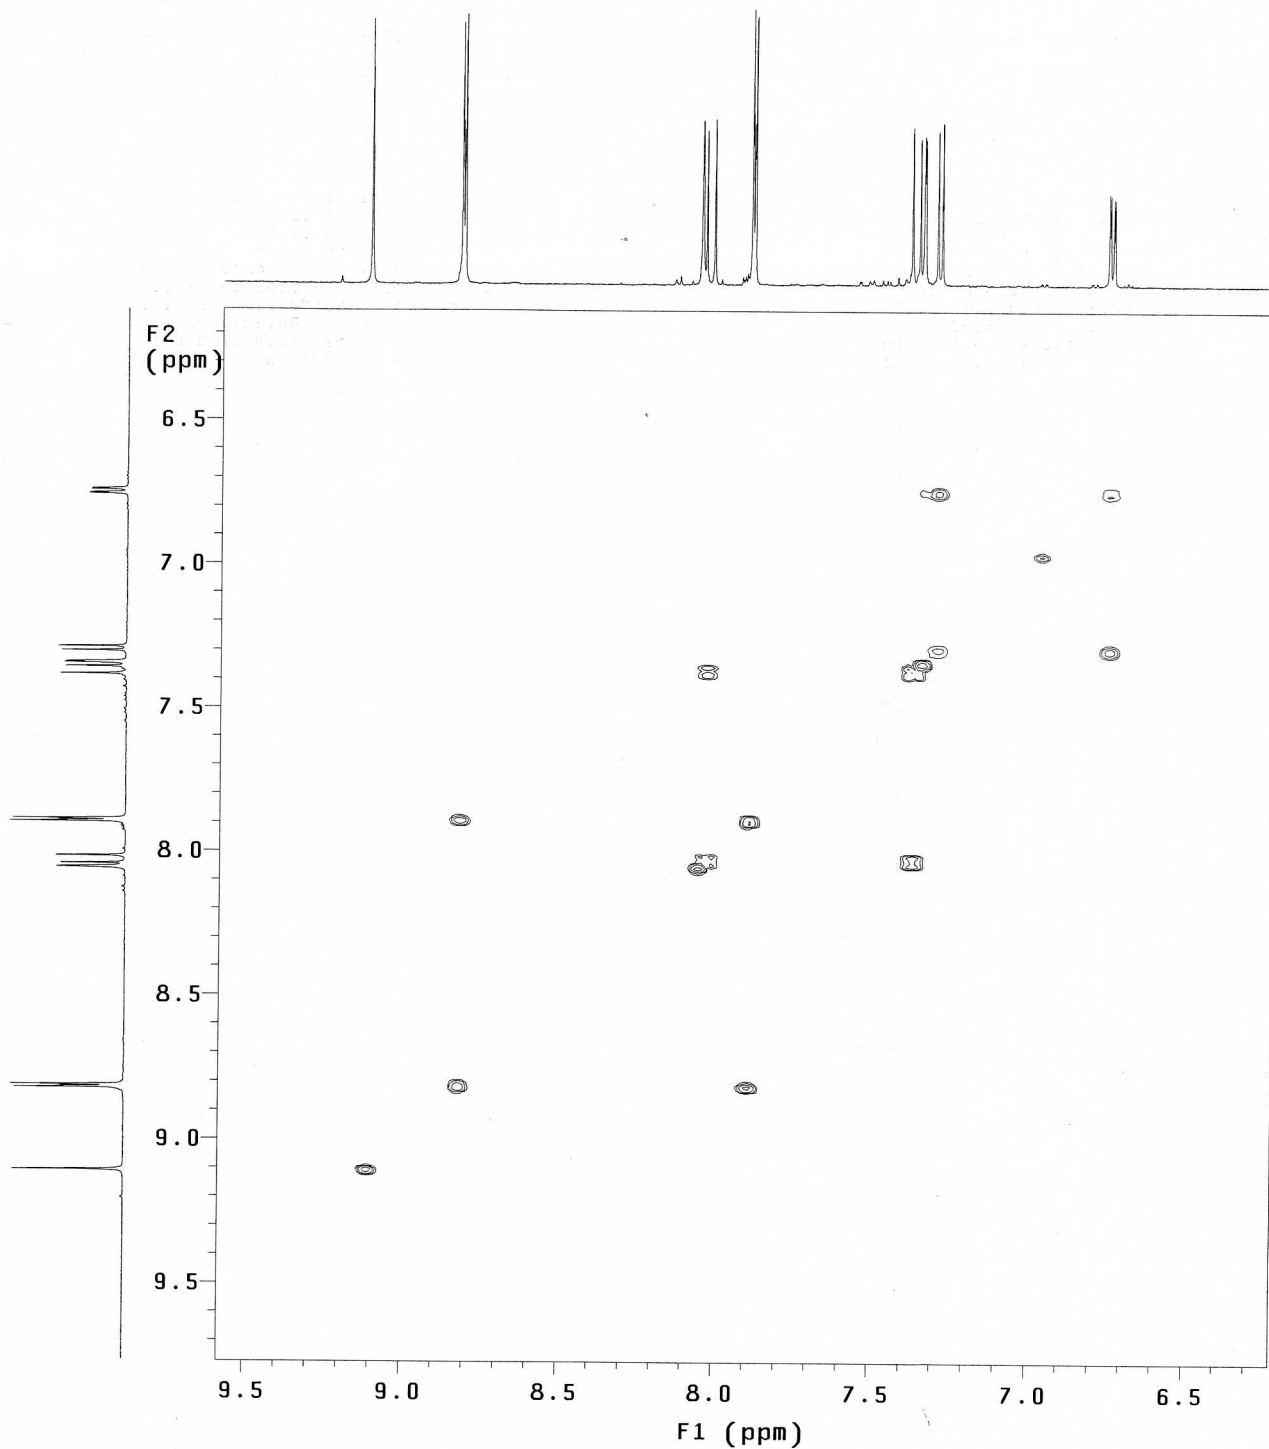

S29

STANDARD PROTON PARAMETERS

Pulse Sequence: s2pu1

Solvent: DMSO  
Ambient temperature  
INOVA-600 "inova600"

Relax. delay 1.000 sec  
Pulse 31.8 degrees  
Acq. time 3.000 sec  
Width 8999.9 Hz  
16 repetitions  
OBSERVE H1, 599.8751457 MHz  
DATA PROCESSING  
Line broadening 0.4 Hz  
FT size 131072  
Total time 1 min, 4 sec

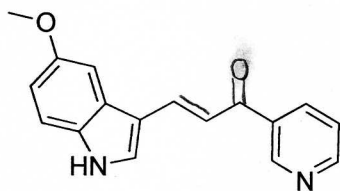

16

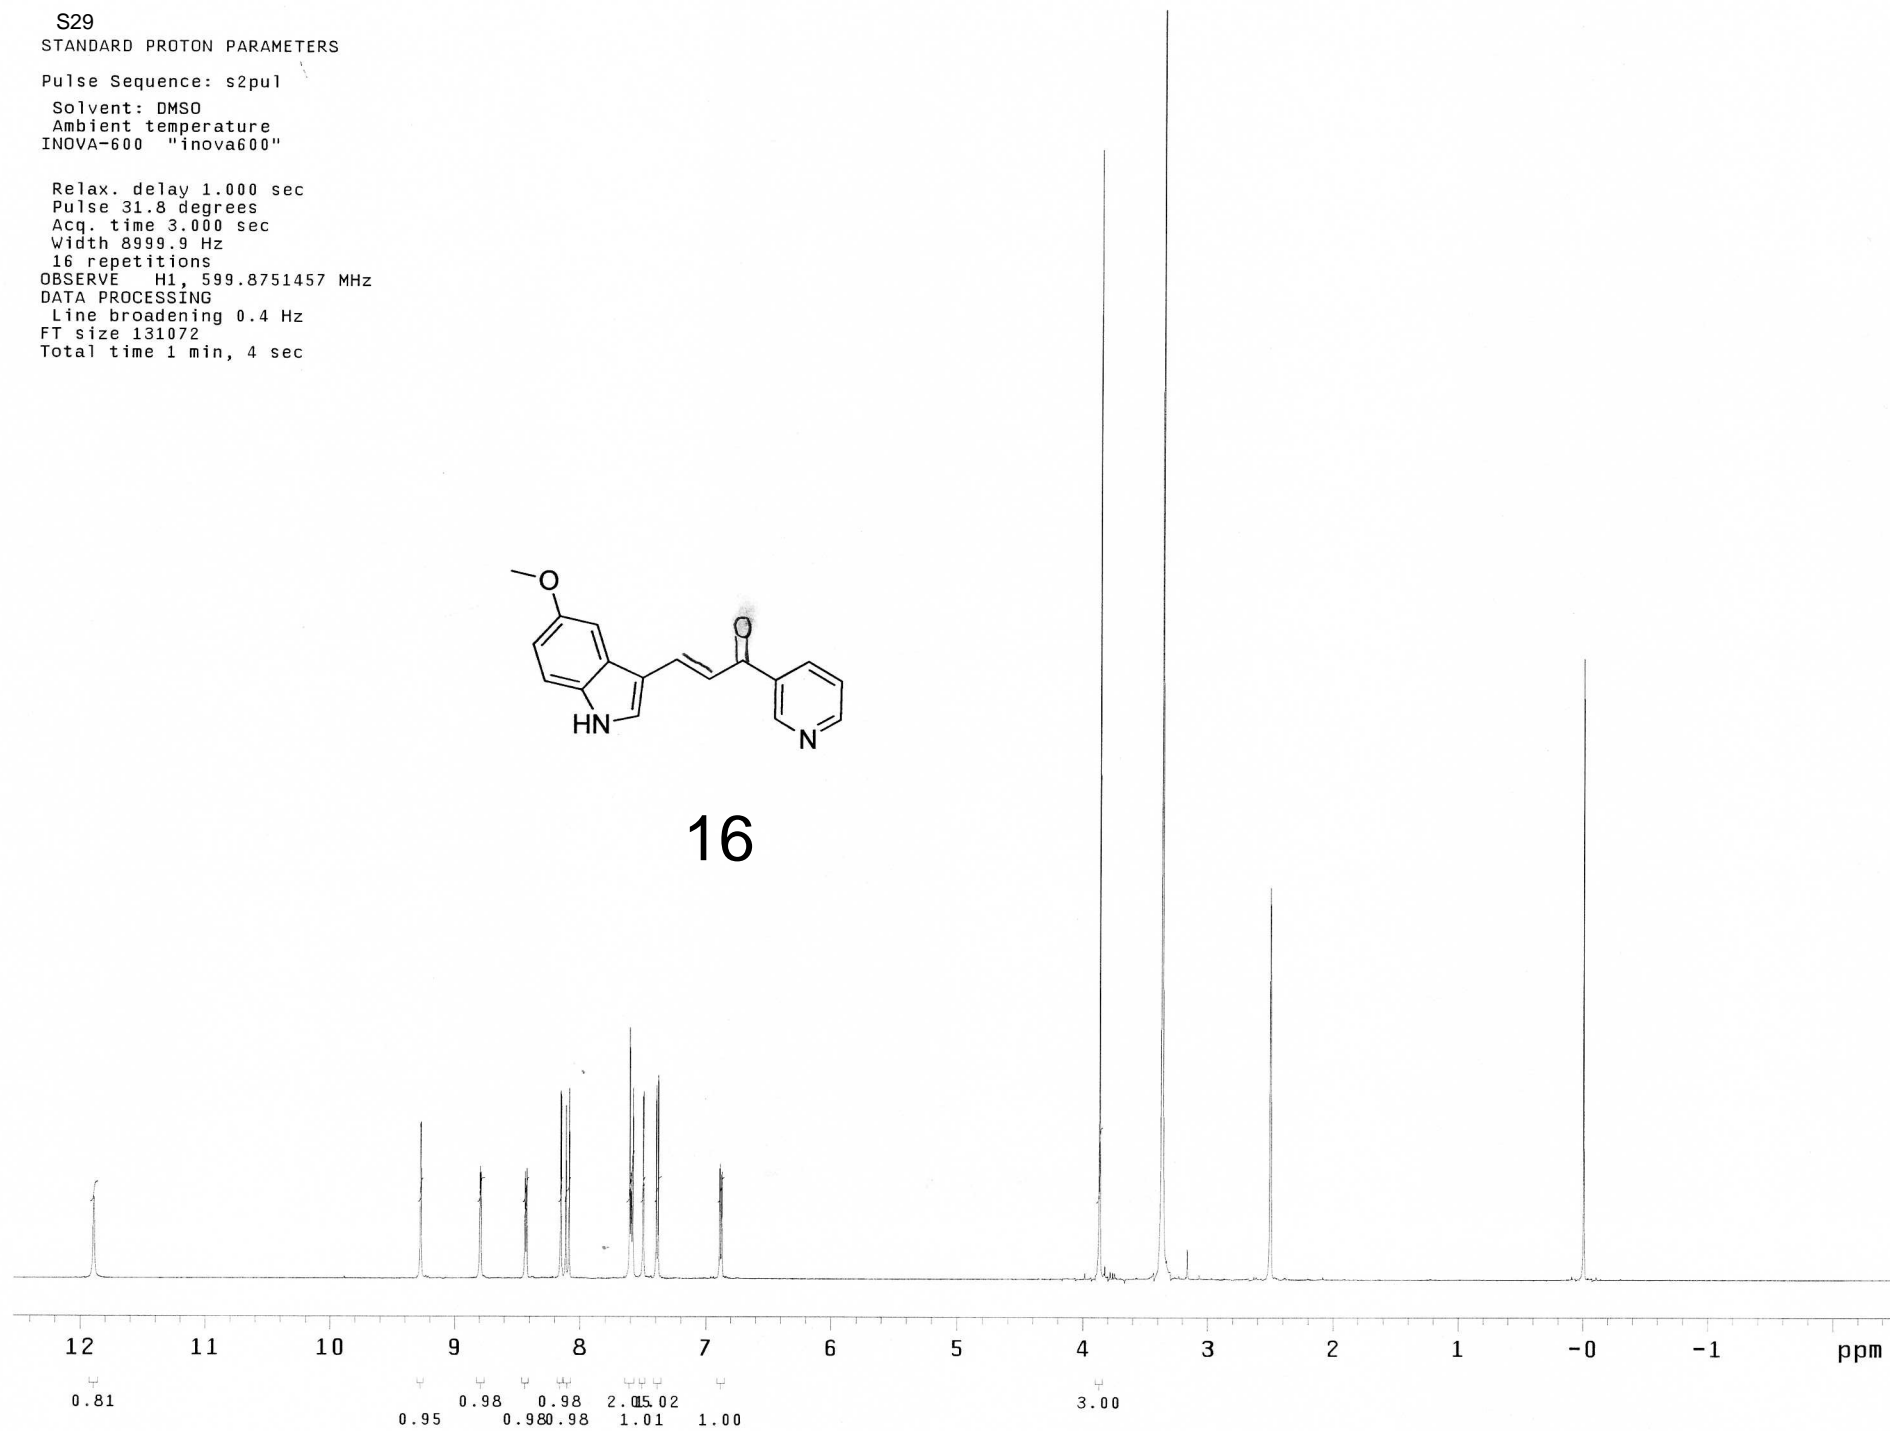

S30  
STANDARD CARBON PARAMETERS

Pulse Sequence: s2pu1

Solvent: DMSO

Ambient temperature

User: 1-14-87

INOVA-600 "inova600"

Pulse 51.7 degrees

Acq. time 1.000 sec

Width 37735.8 Hz

41104 repetitions

OBSERVE C13, 150.8387879 MHz

DECOUPLE H1, 599.8781638 MHz

Power 32 dB

continuously on

WALTZ-16 modulated

DATA PROCESSING

Gauss window 0.600 sec

center at 0.100 sec

FT size 524288

Total time 28 hr, 1 min, 31 sec

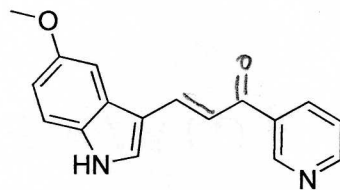

16

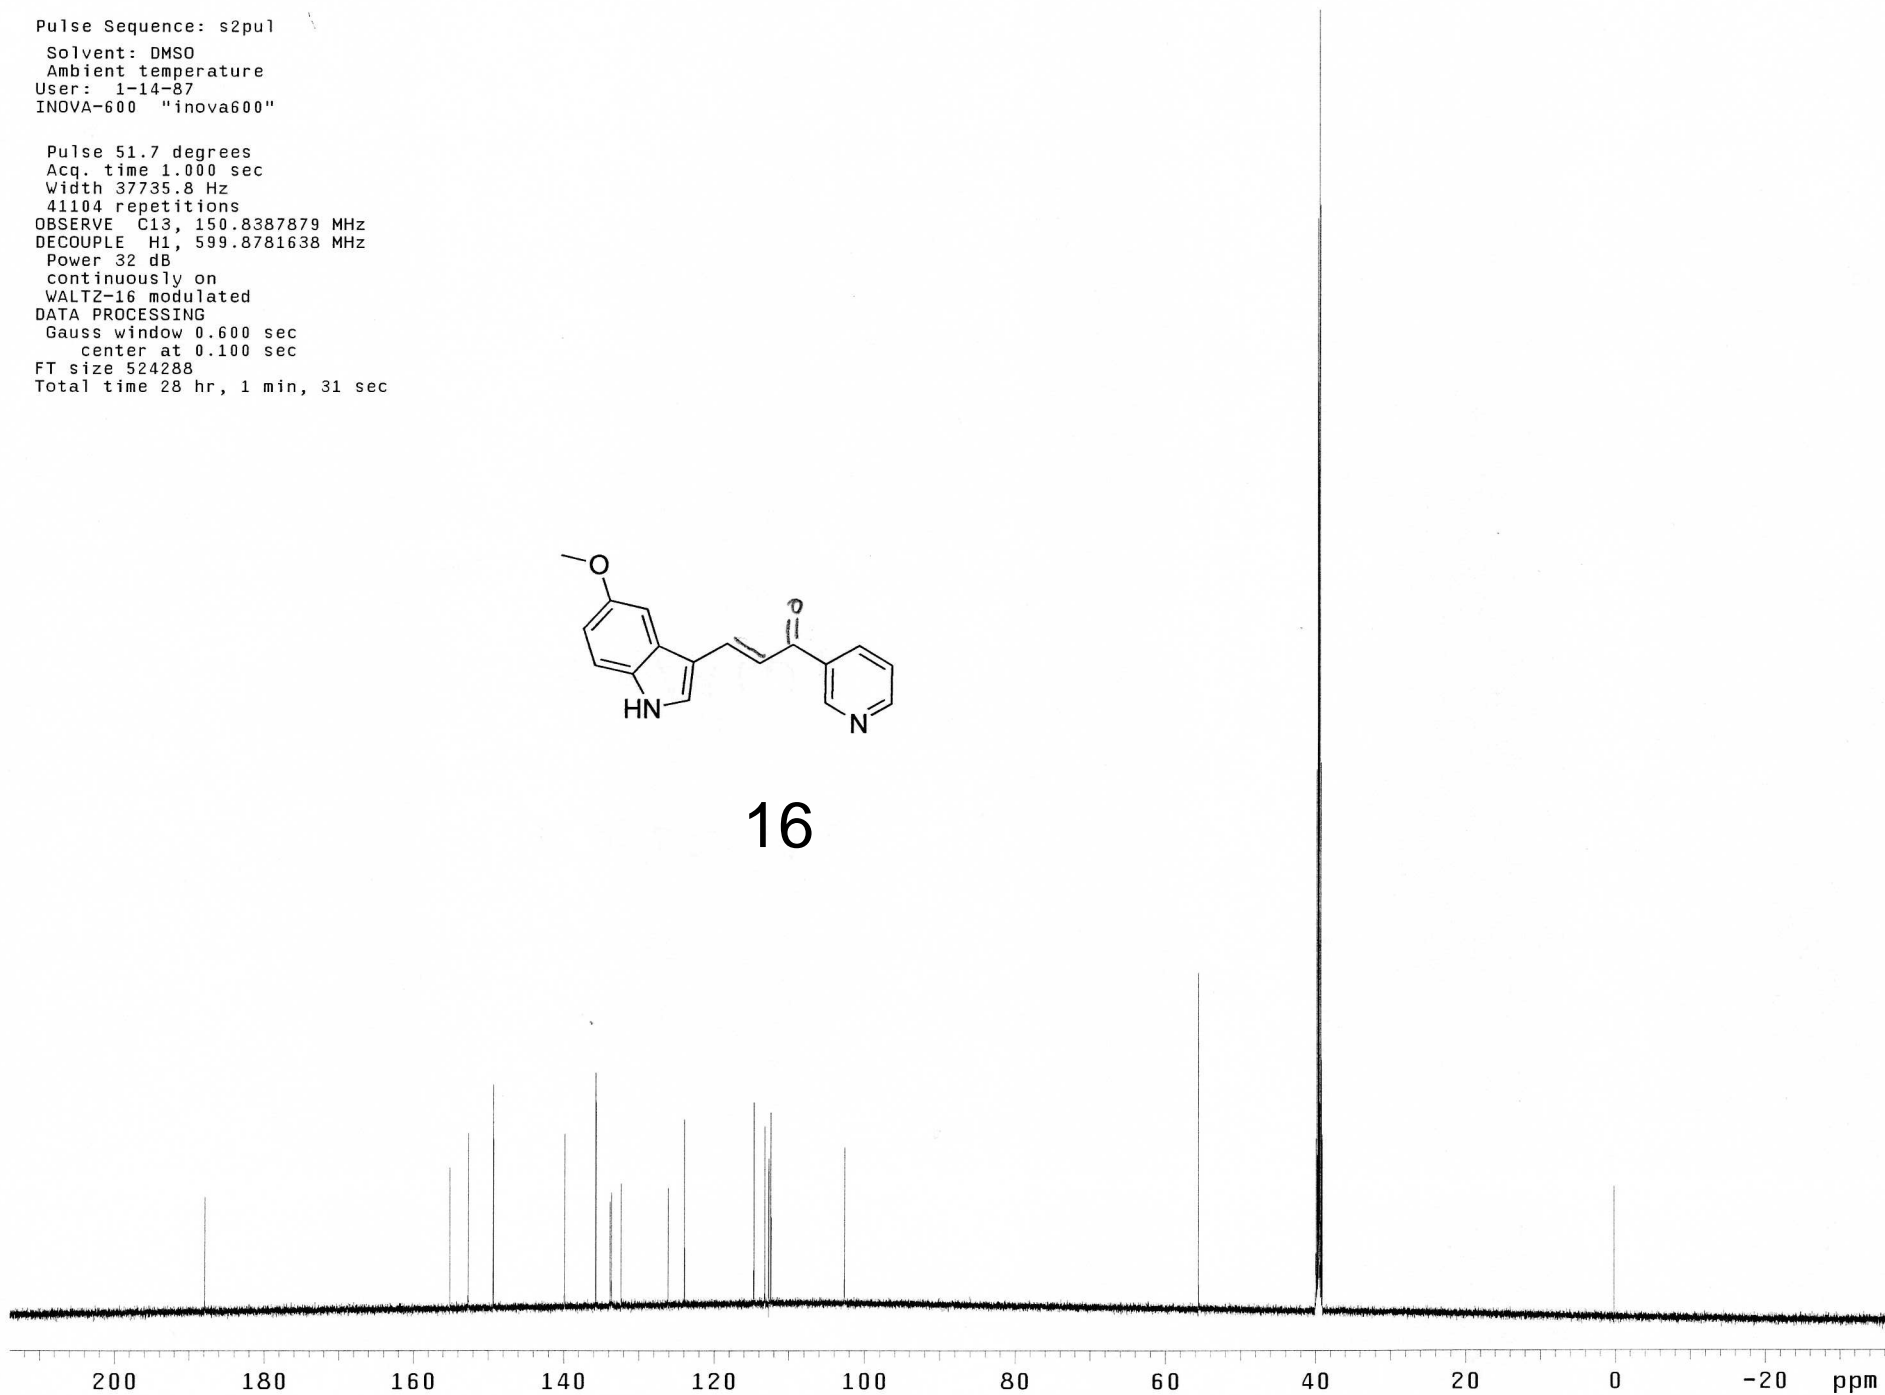

S31  
STANDARD PROTON PARAMETERS

Pulse Sequence: gcosy  
Solvent: DMSO  
Ambient temperature  
File: 100121d  
INOVA-600 "inova600"

Relax. delay 1.000 sec  
Acq. time 0.138 sec  
Width 3713.5 Hz  
2D Width 3713.5 Hz  
Single scan  
256 increments  
OBSERVE H1, 599.8751457 MHz  
DATA PROCESSING  
Sine bell 0.069 sec  
F1 DATA PROCESSING  
Sine bell 0.034 sec  
FT size 1024 x 1024  
Total time 5 min, 5 sec

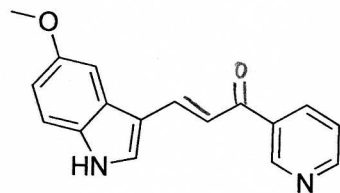

16

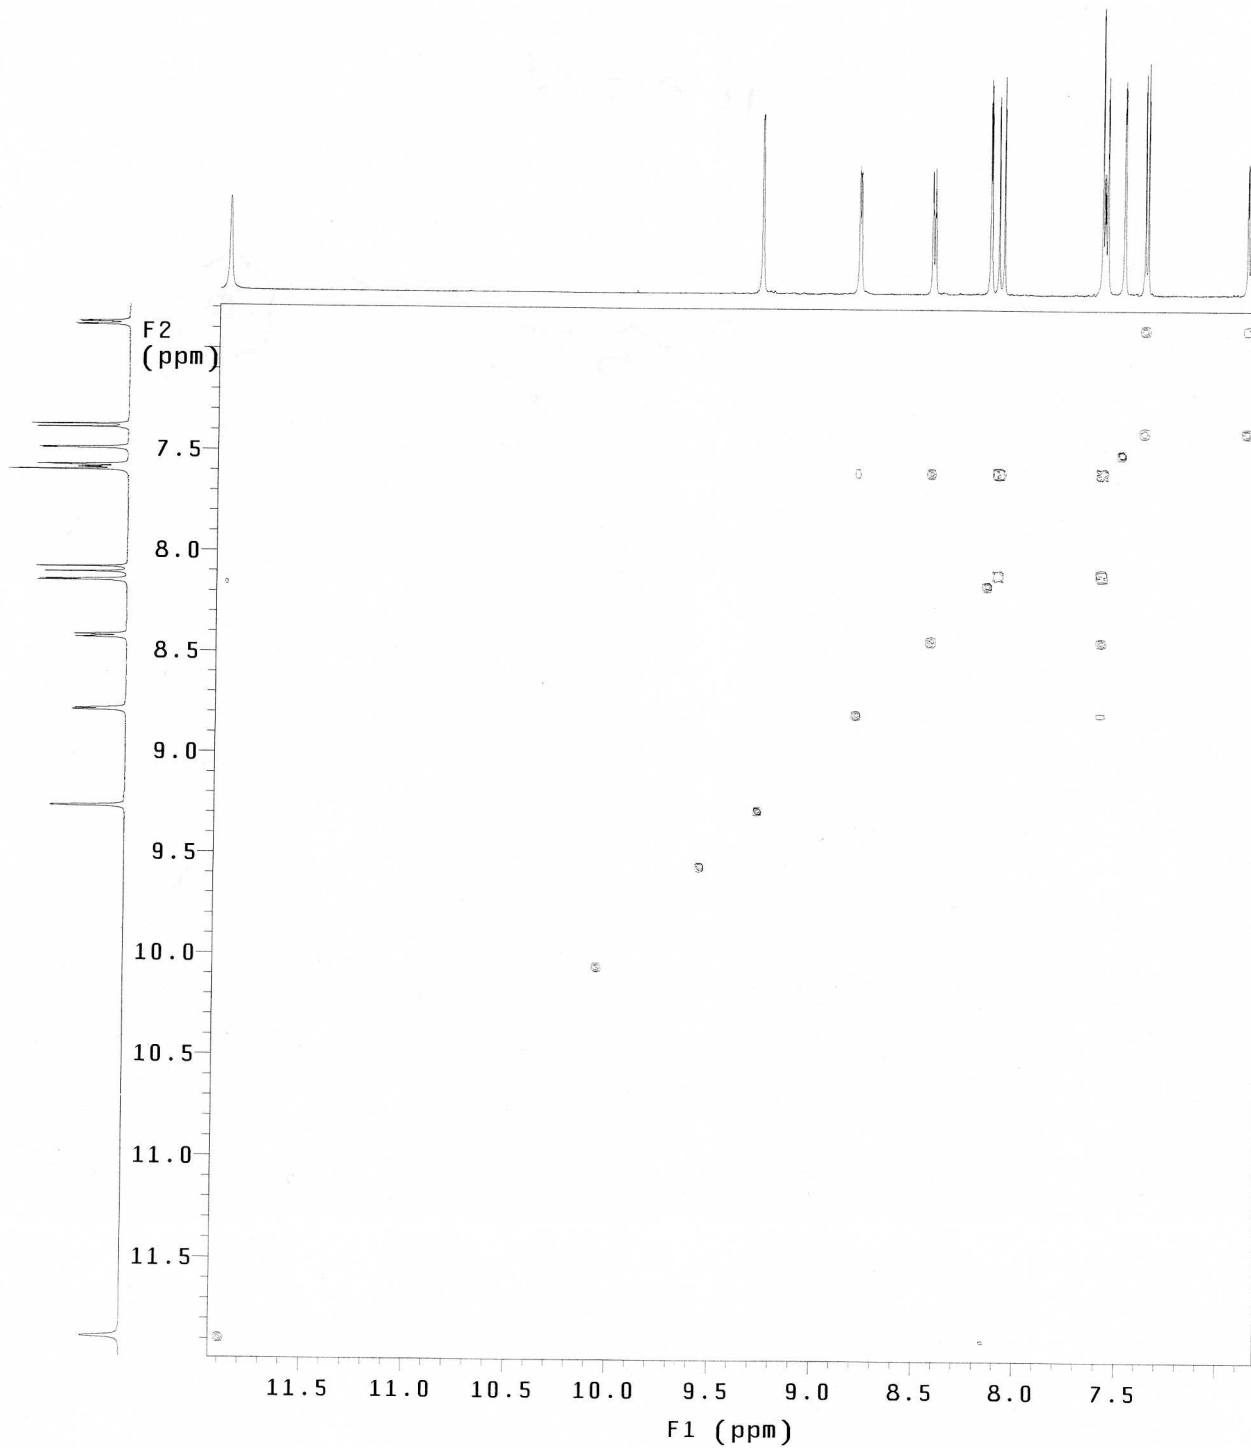

S32

STANDARD PROTON PARAMETERS

Pulse Sequence: s2pul

Solvent: DMSO  
Ambient temperature  
File: 100125e  
INOVA-600 "inova600"

Relax. delay 1.000 sec  
Pulse 31.8 degrees  
Acq. time 3.000 sec  
Width 8999.9 Hz  
16 repetitions  
OBSERVE H1, 599.8751461 MHz  
DATA PROCESSING  
Line broadening 0.4 Hz  
FT size 131072  
Total time 1 min, 4 sec

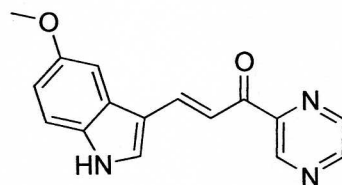

17

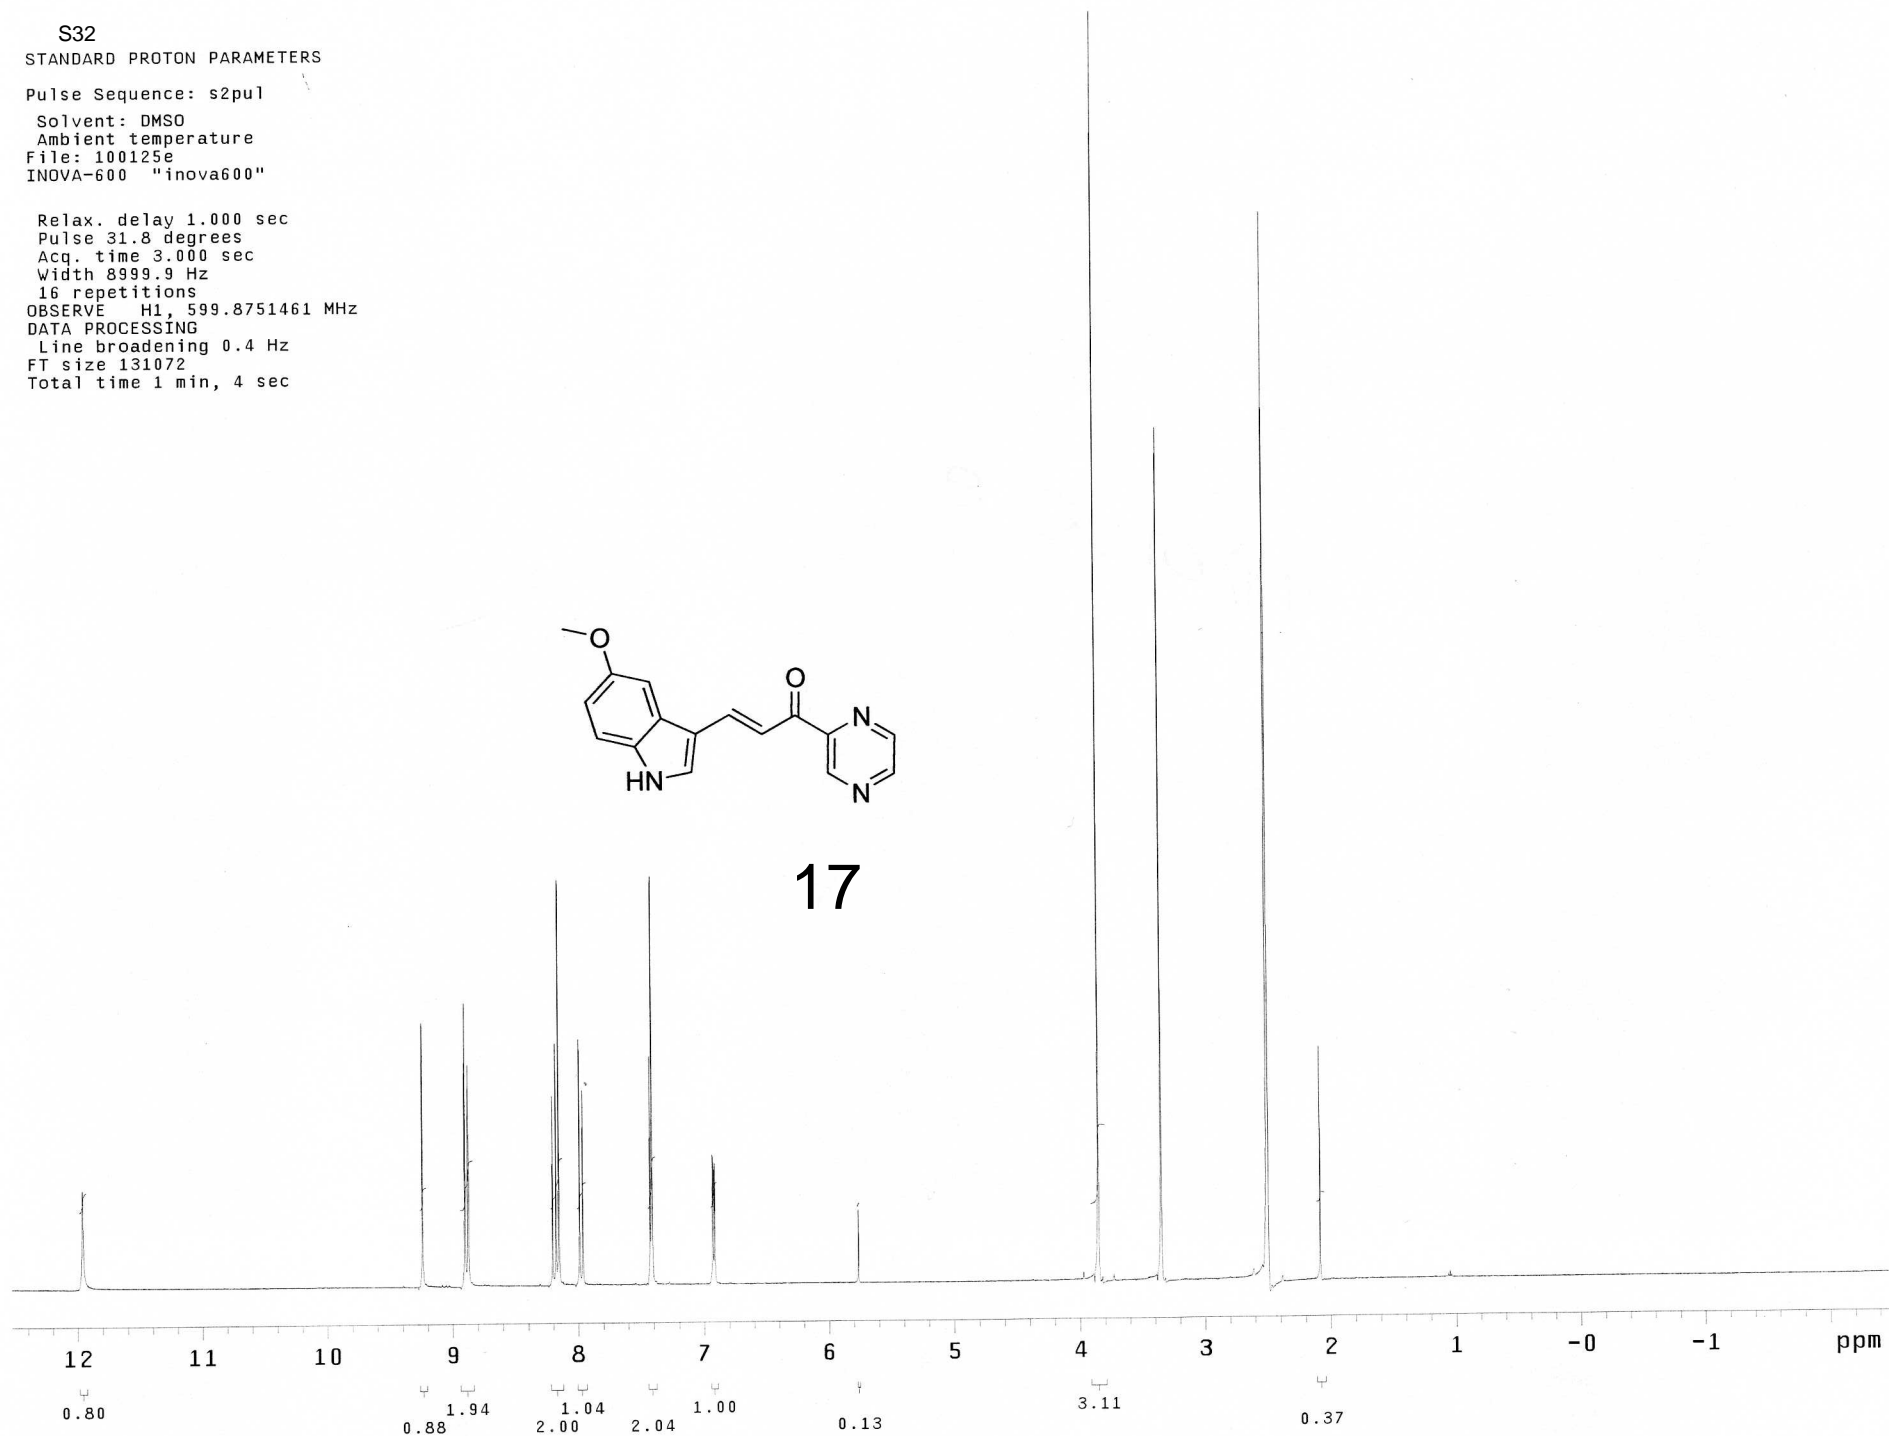



S33  
13C OBSERVE

Pulse Sequence: s2pu1

Solvent: DMSO  
Ambient temperature  
File: 100202a  
UNITY-400 "vxrs400"

Relax. delay 0.100 sec  
Pulse 60.6 degrees  
Acq. time 1.205 sec  
Width 27192.4 Hz  
5408 repetitions  
OBSERVE C13, 100.5676972 MHz  
DECOUPLE H1, 399.9530039 MHz  
Low power 3 dB atten.  
continuously on  
WALTZ-16 modulated  
DATA PROCESSING  
Line broadening 0.5 Hz  
Gauss window 0.500 sec  
center at 0.100 sec  
FT size 131072  
Total time 36 hr, 33 min, 9 sec

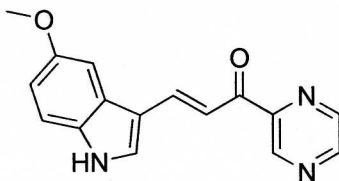

17

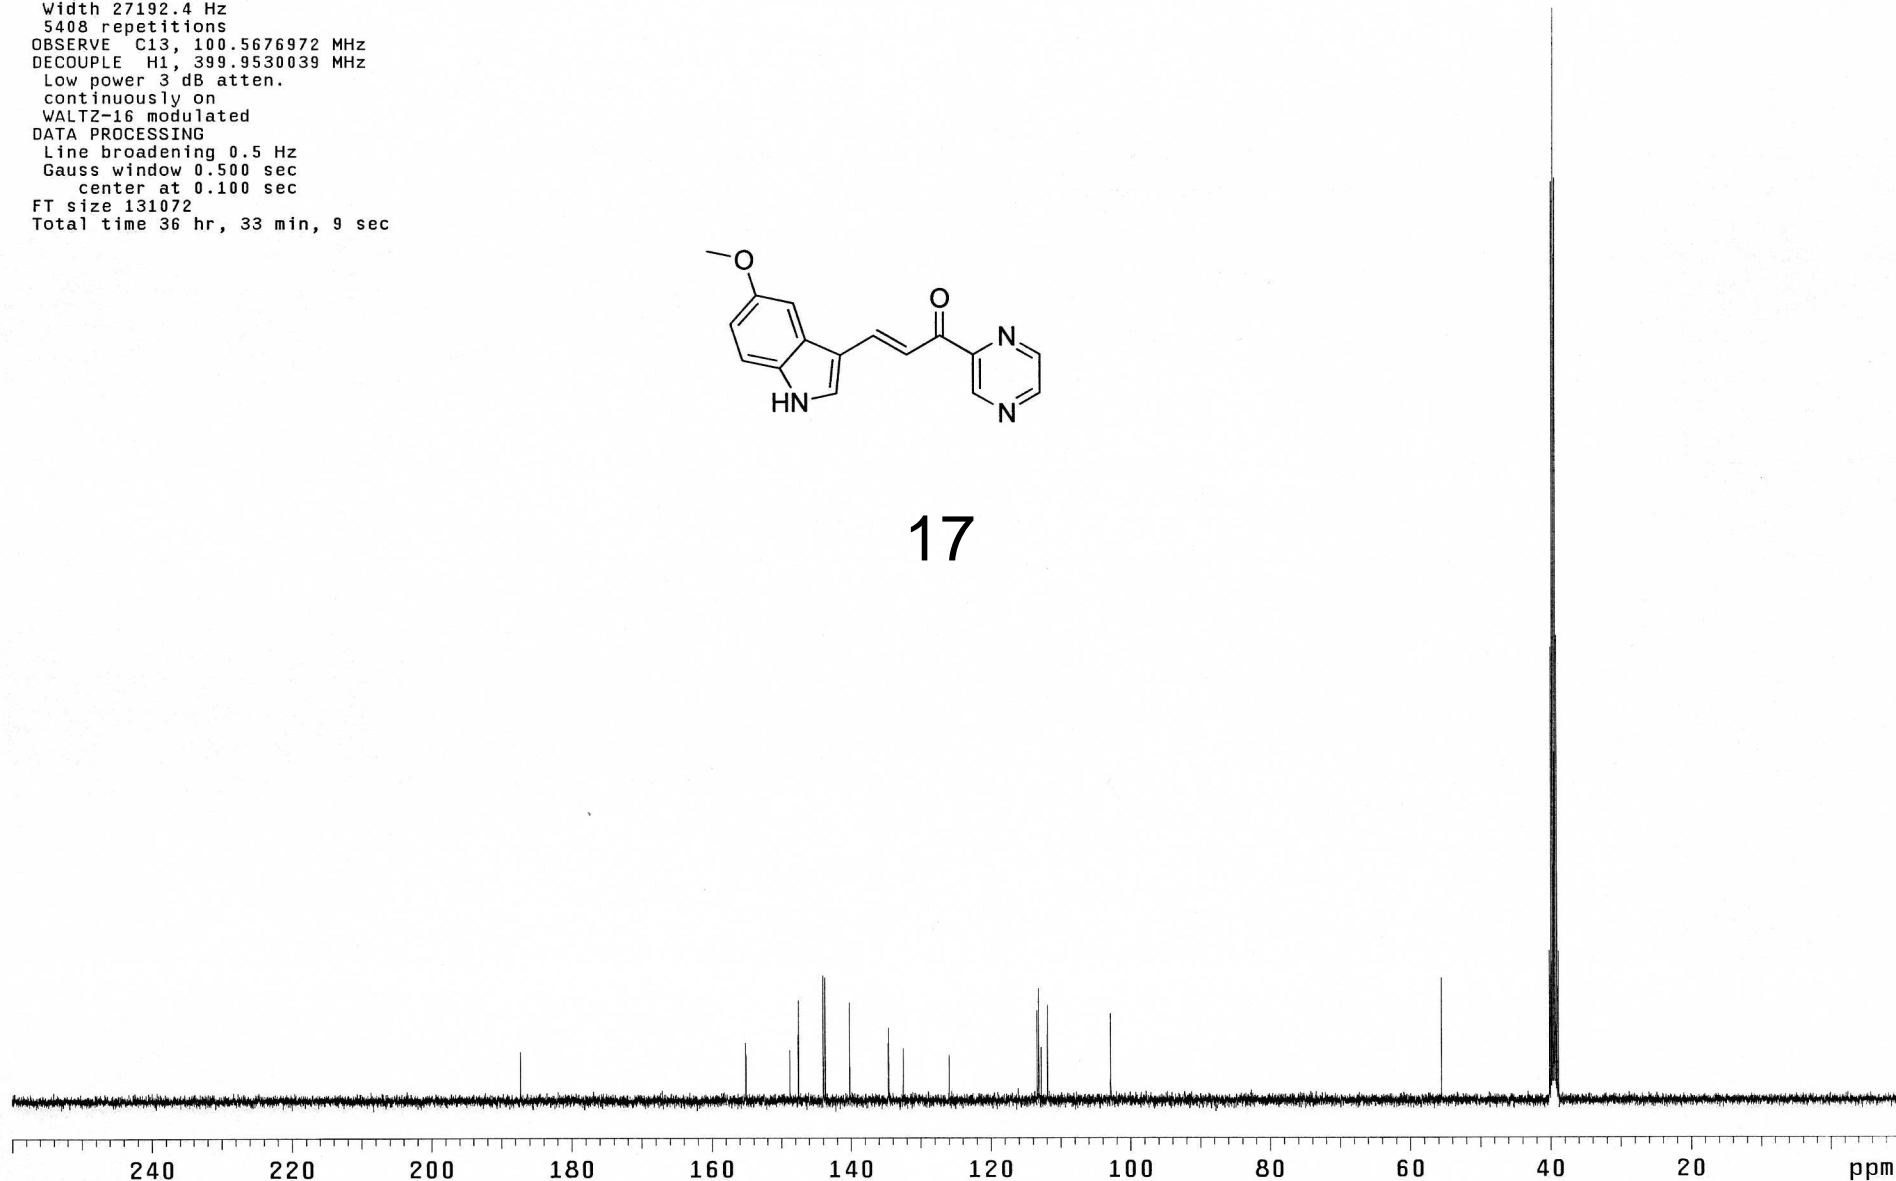

S34

STANDARD PROTON PARAMETERS

Pulse Sequence: gcosy

Solvent: DMSO

Ambient temperature

INOVA-600 "inova600"

Relax. delay 1.000 sec

Acq. time 0.134 sec

Width 3819.9 Hz

2D Width 3819.9 Hz

Single scan

256 increments

OBSERVE H1, 599.8751461 MHz

DATA PROCESSING

Sine bell 0.067 sec

F1 DATA PROCESSING

Sine bell 0.034 sec

FT size 1024 x 1024

Total time 5 min, 4 sec

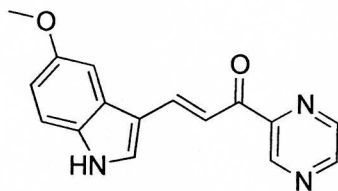

17

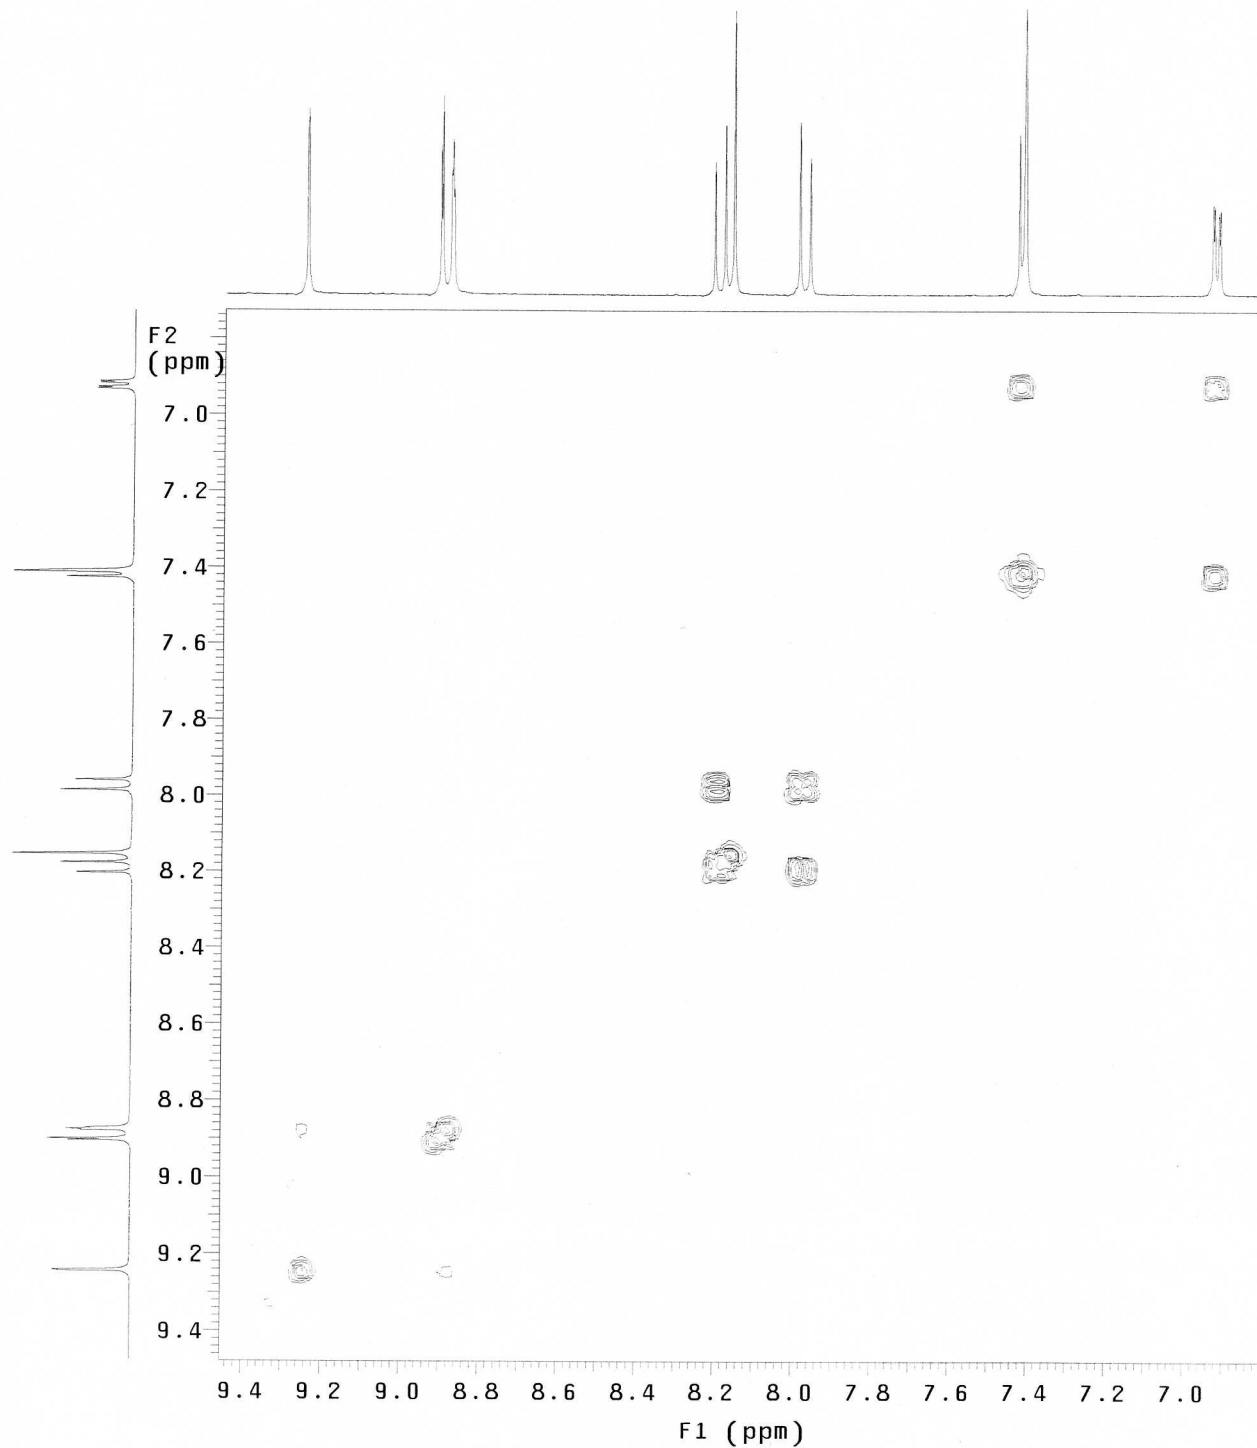

S35

STANDARD PROTON PARAMETERS

Pulse Sequence: s2pu1

Solvent: CDC13

Ambient temperature

File: 091222b

INOVA-600 "inova-wkst"

Relax. delay 1.000 sec

Pulse 31.8 degrees

Acq. time 3.000 sec

Width 8000.0 Hz

16 repetitions

OBSERVE H1, 599.8723067 MHz

DATA PROCESSING

Line broadening 0.4 Hz

FT size 131072

Total time 1 min, 4 sec

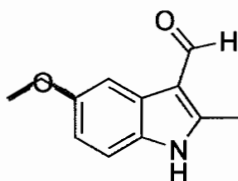

18

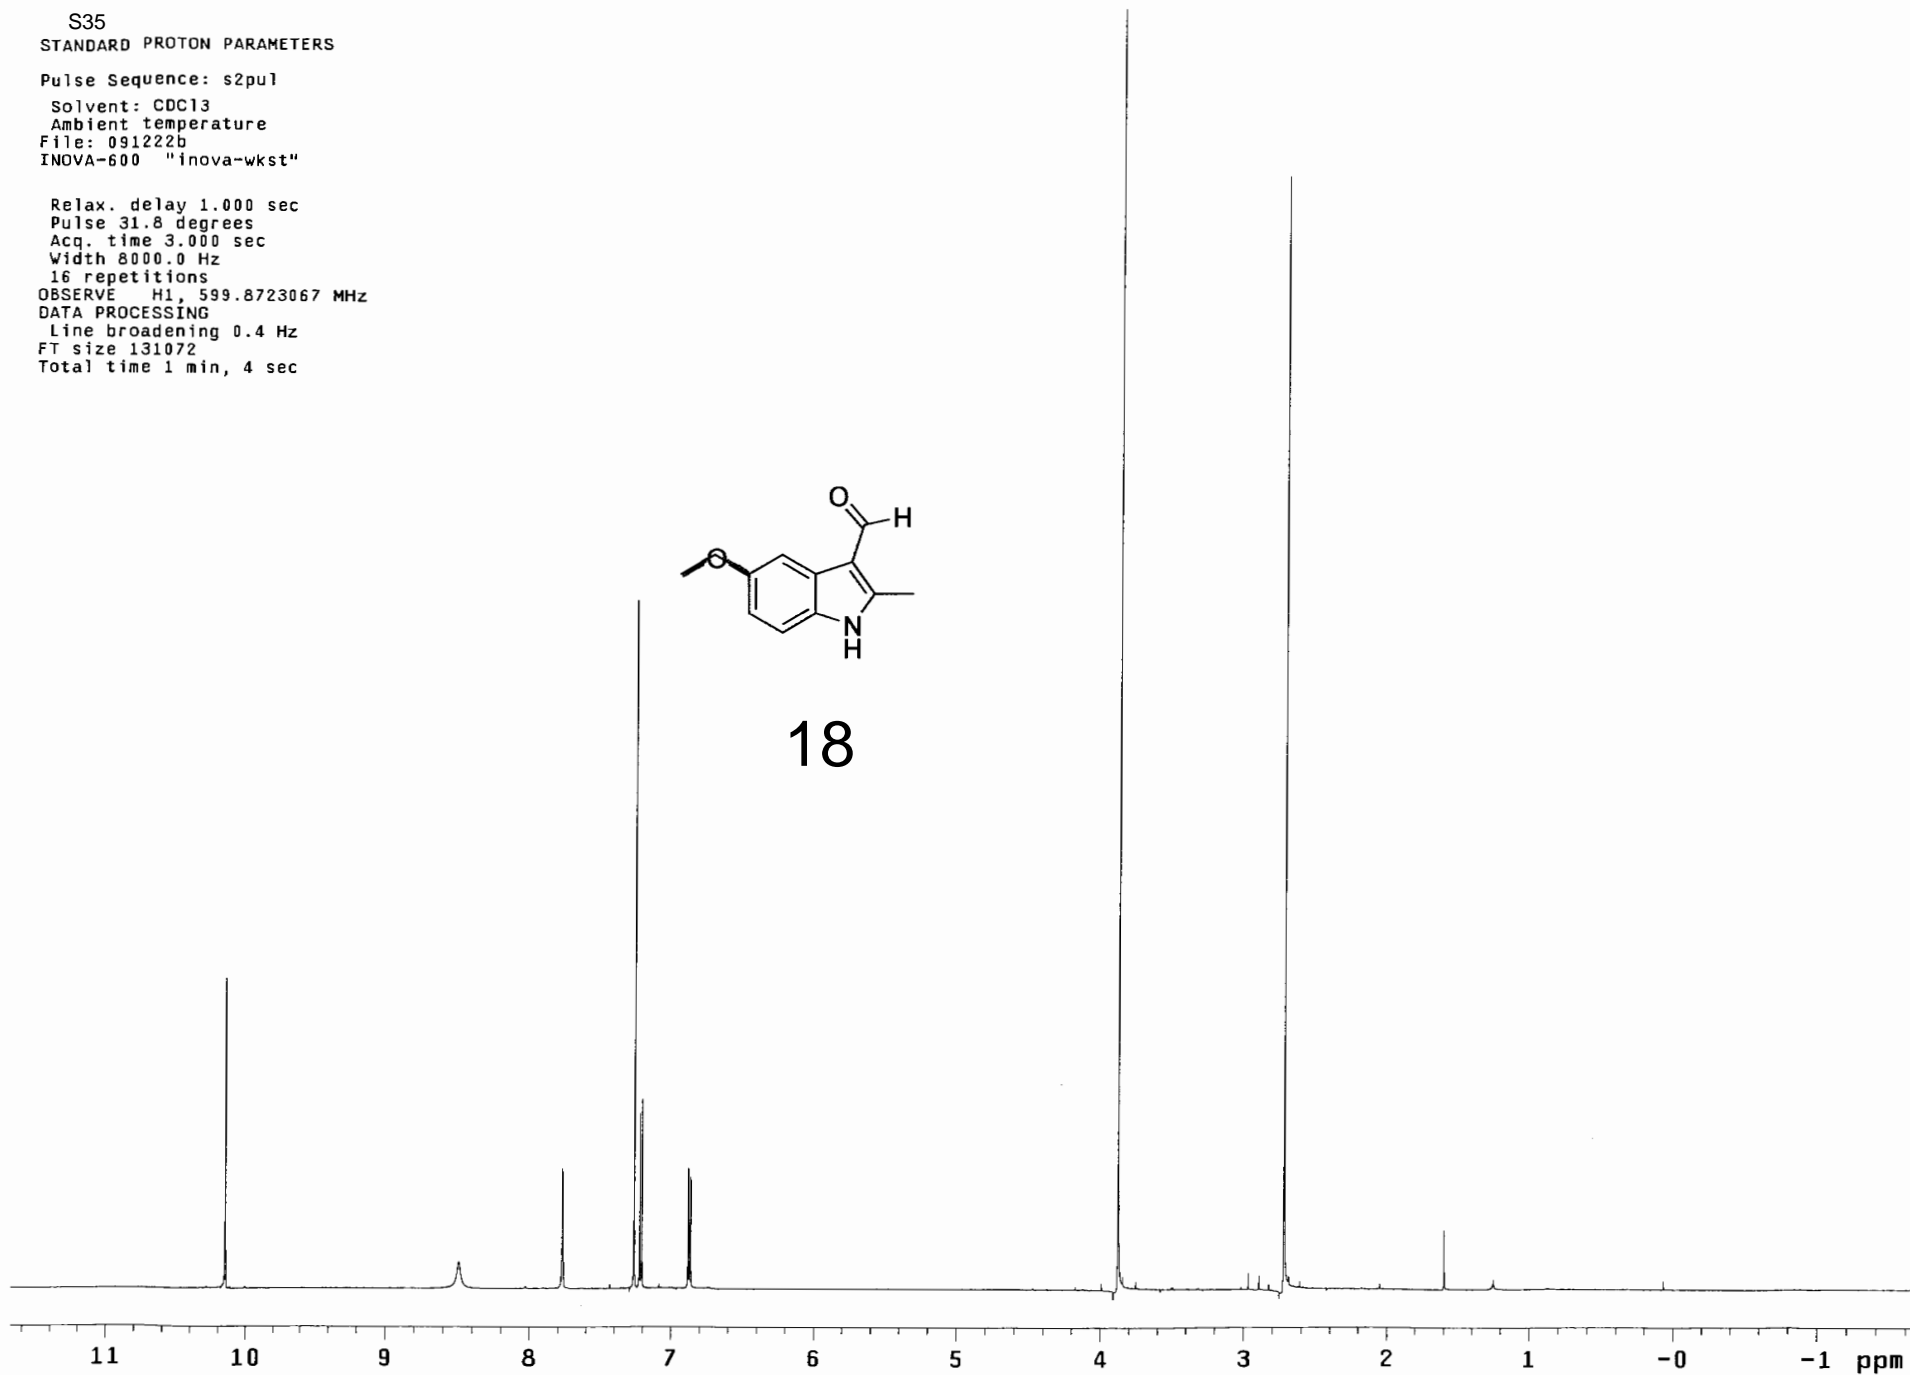

S36

STANDARD CARBON PARAMETERS

Feb 2 2010

Pulse Sequence: s2pul

Solvent: CDCl3  
Ambient temperature  
User: 1-14-87  
File: 100202b  
INOVA-600 "inova600"

Pulse 51.7 degrees  
Acq. time 1.000 sec  
Width 37735.8 Hz  
11408 repetitions  
OBSERVE C13, 150.8379917 MHz  
DECOUPLE H1, 599.8753144 MHz  
Power 32 dB  
continuously on  
WALTZ-16 modulated  
DATA PROCESSING  
Gauss window 0.600 sec  
center at 0.100 sec  
FT size 524288  
Total time 28 hr, 1 min, 31 sec

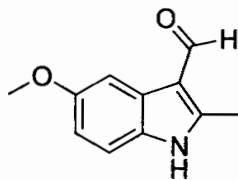

18

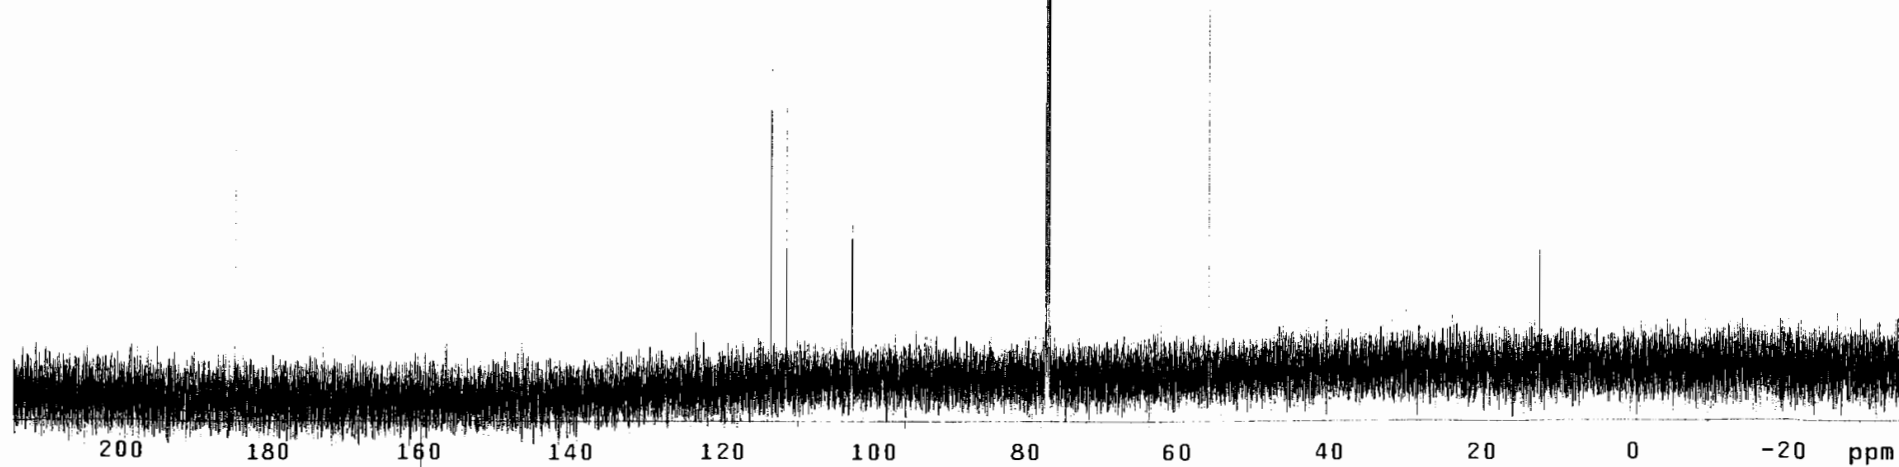

S37

STANDARD 1H OBSERVE

Pulse Sequence: s2pu1

Solvent: DMSO  
Ambient temperature  
UNITY-400 "vxrs400"

Relax. delay 2.000 sec  
Pulse 51.1 degrees  
Acq. time 2.731 sec  
Width 5999.7 Hz  
32 repetitions  
OBSERVE H1, 399.9505784 MHz  
DATA PROCESSING  
Line broadening 0.5 Hz  
FT size 65536  
Total time 2 min, 31 sec

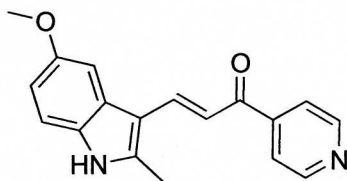

19

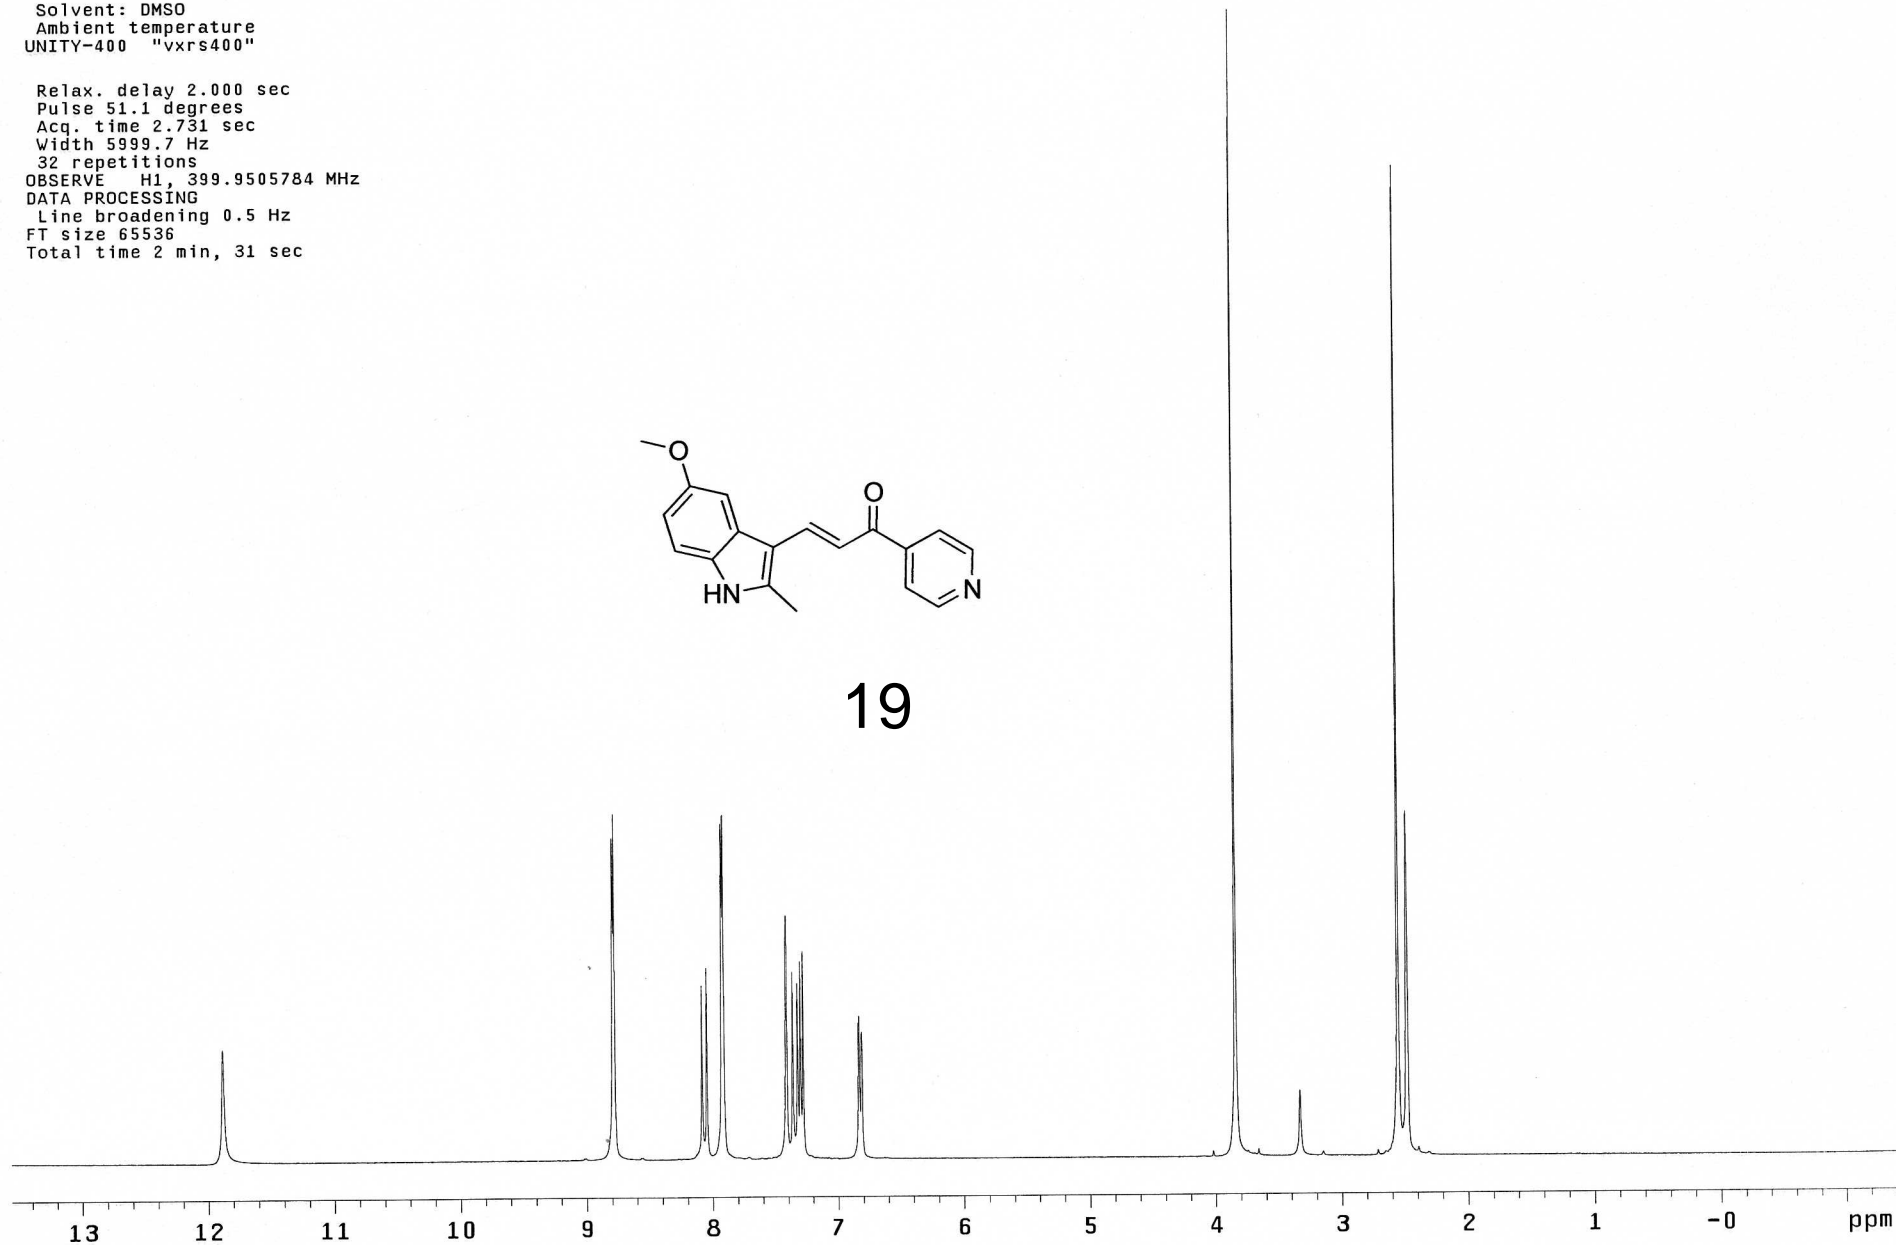

S38

STANDARD CARBON PARAMETERS

Pulse Sequence: s2pu1

Solvent: DMSO

Ambient temperature

User: 1-14-87

INOVA-600 "inova600"

Pulse 51.7 degrees

Acq. time 1.000 sec

Width 37735.8 Hz

2192 repetitions

OBSERVE C13, 150.8387920 MHz

DECOUPLE H1, 599.8781638 MHz

Power 32 dB

continuously on

WALTZ-16 modulated

DATA PROCESSING

Gauss window 0.600 sec

center at 0.100 sec

FT size 524288

Total time 2 hr, 48 min, 9 sec

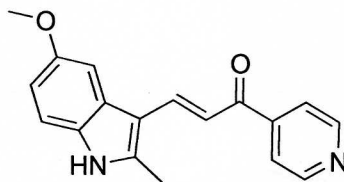

19

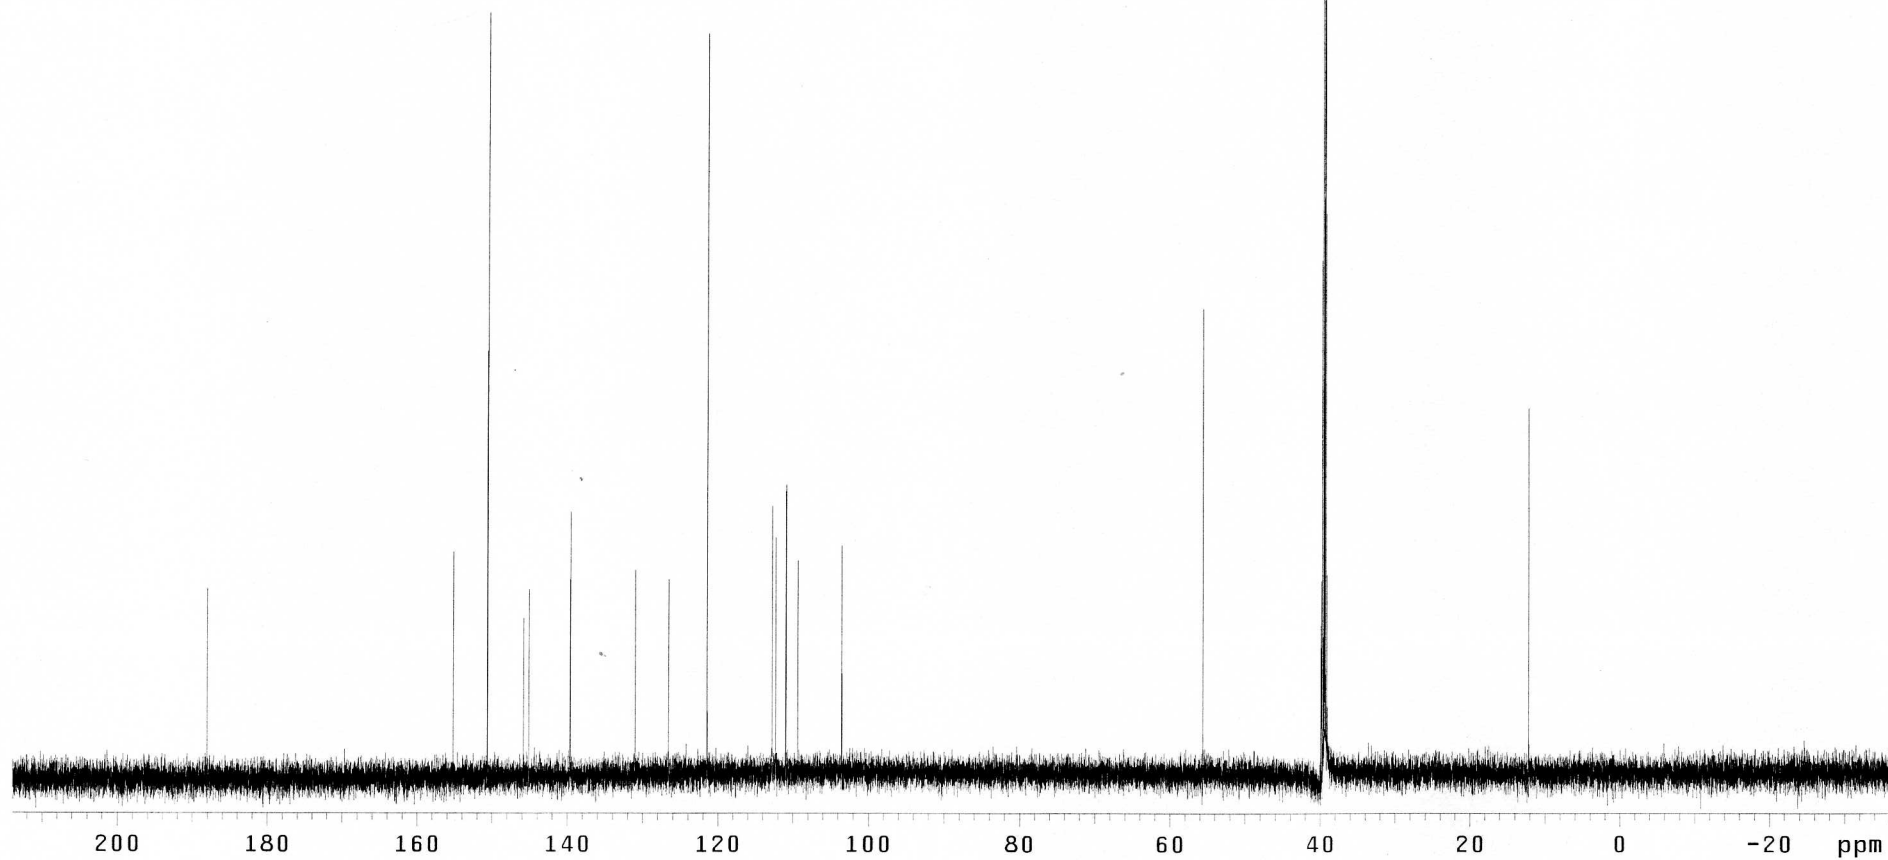

S39  
STANDARD 1H OBSERVE

Pulse Sequence: relayh  
Solvent: DMSO  
Ambient temperature  
UNITY-400 "vxrs400"

Relax. delay 1.000 sec  
COSY 90-90  
Acq. time 0.232 sec  
Width 1103.8 Hz  
2D Width 1103.8 Hz  
4 repetitions  
128 increments  
OBSERVE H1, 399.9505719 MHz  
DATA PROCESSING  
Sine bell 0.116 sec  
F1 DATA PROCESSING  
Sine bell 0.058 sec  
FT size 512 x 512  
Total time 11 min, 9 sec

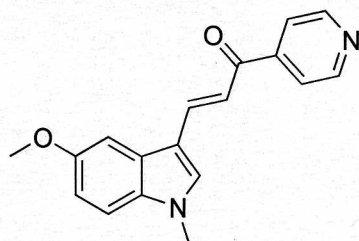

20

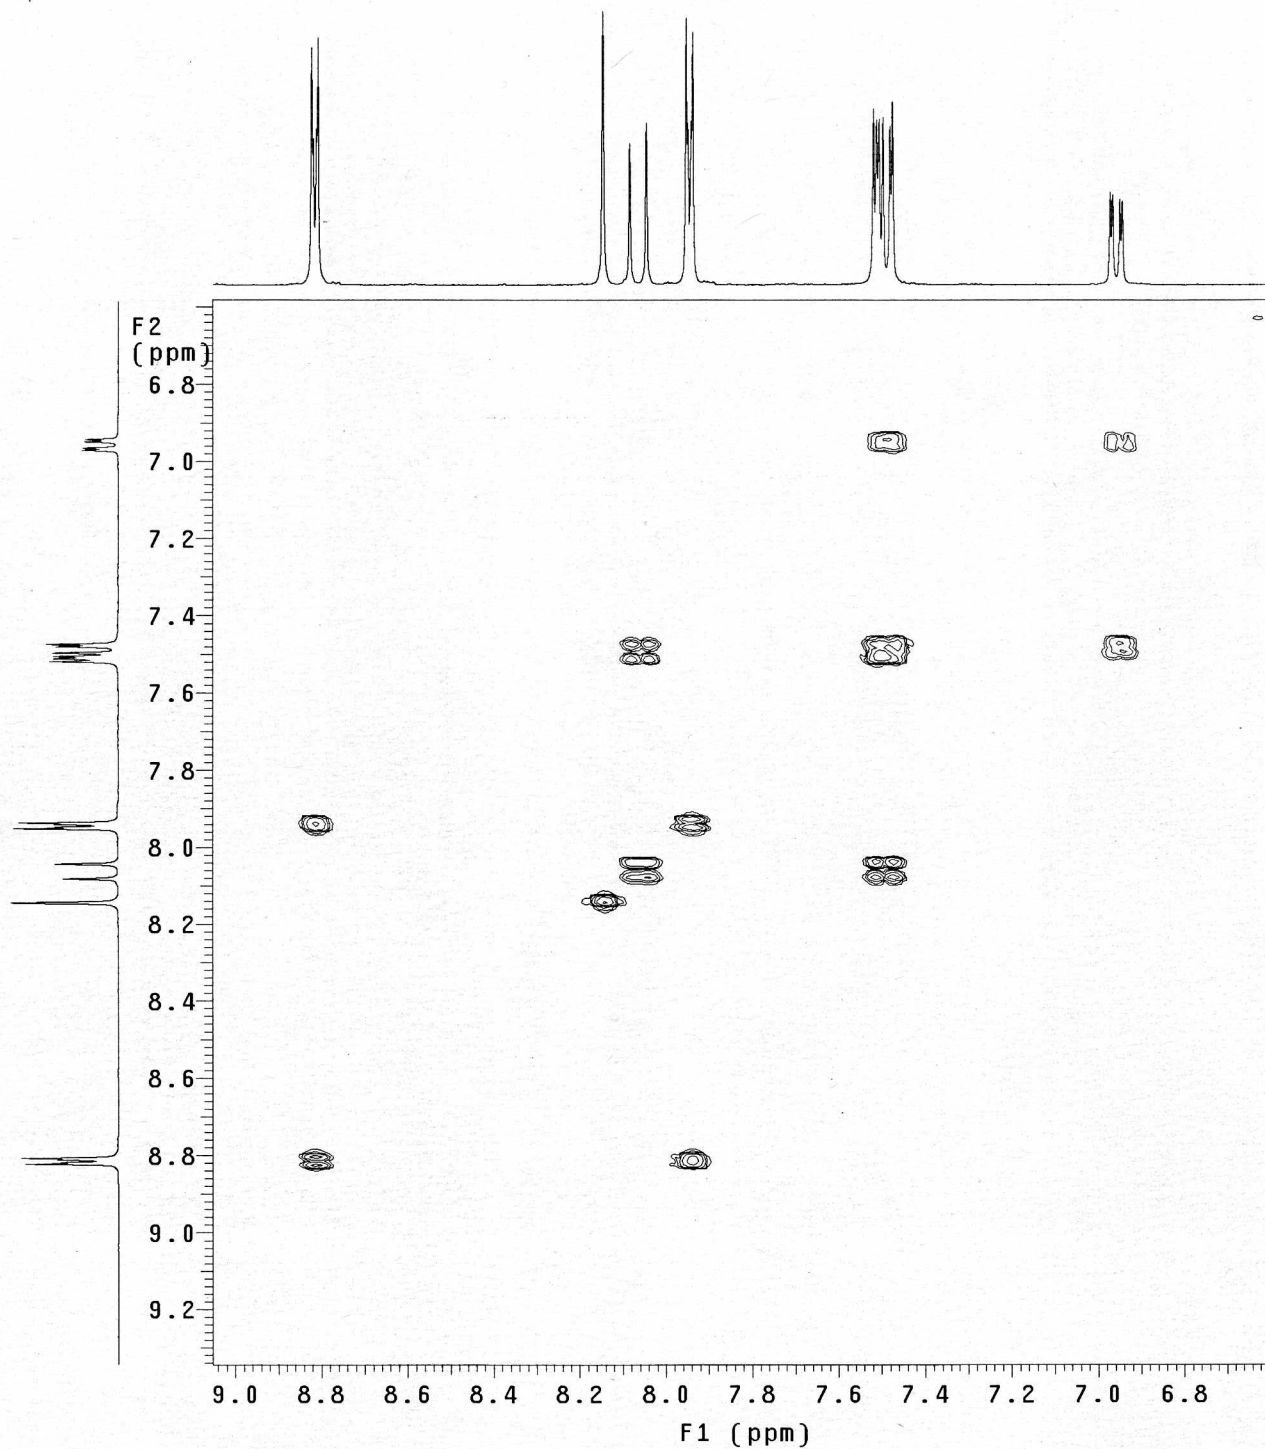

S40

STANDARD PROTON PARAMETERS

Pulse Sequence: gcosy

Solvent: DMSO

Ambient temperature

INOVA-600 "inova600"

Relax. delay 1.000 sec

Acq. time 0.126 sec

Width 2035.4 Hz

2D Width 2035.4 Hz

Single scan

84 increments

OBSERVE H1, 599.8751470 MHz

DATA PROCESSING

Sine bell 0.063 sec

F1 DATA PROCESSING

Sine bell 0.021 sec

FT size 512 x 512

Total time 1 min, 39 sec

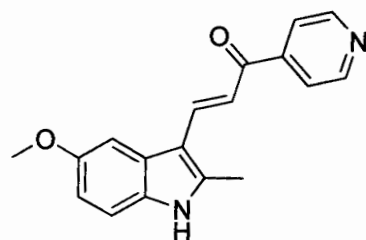

19

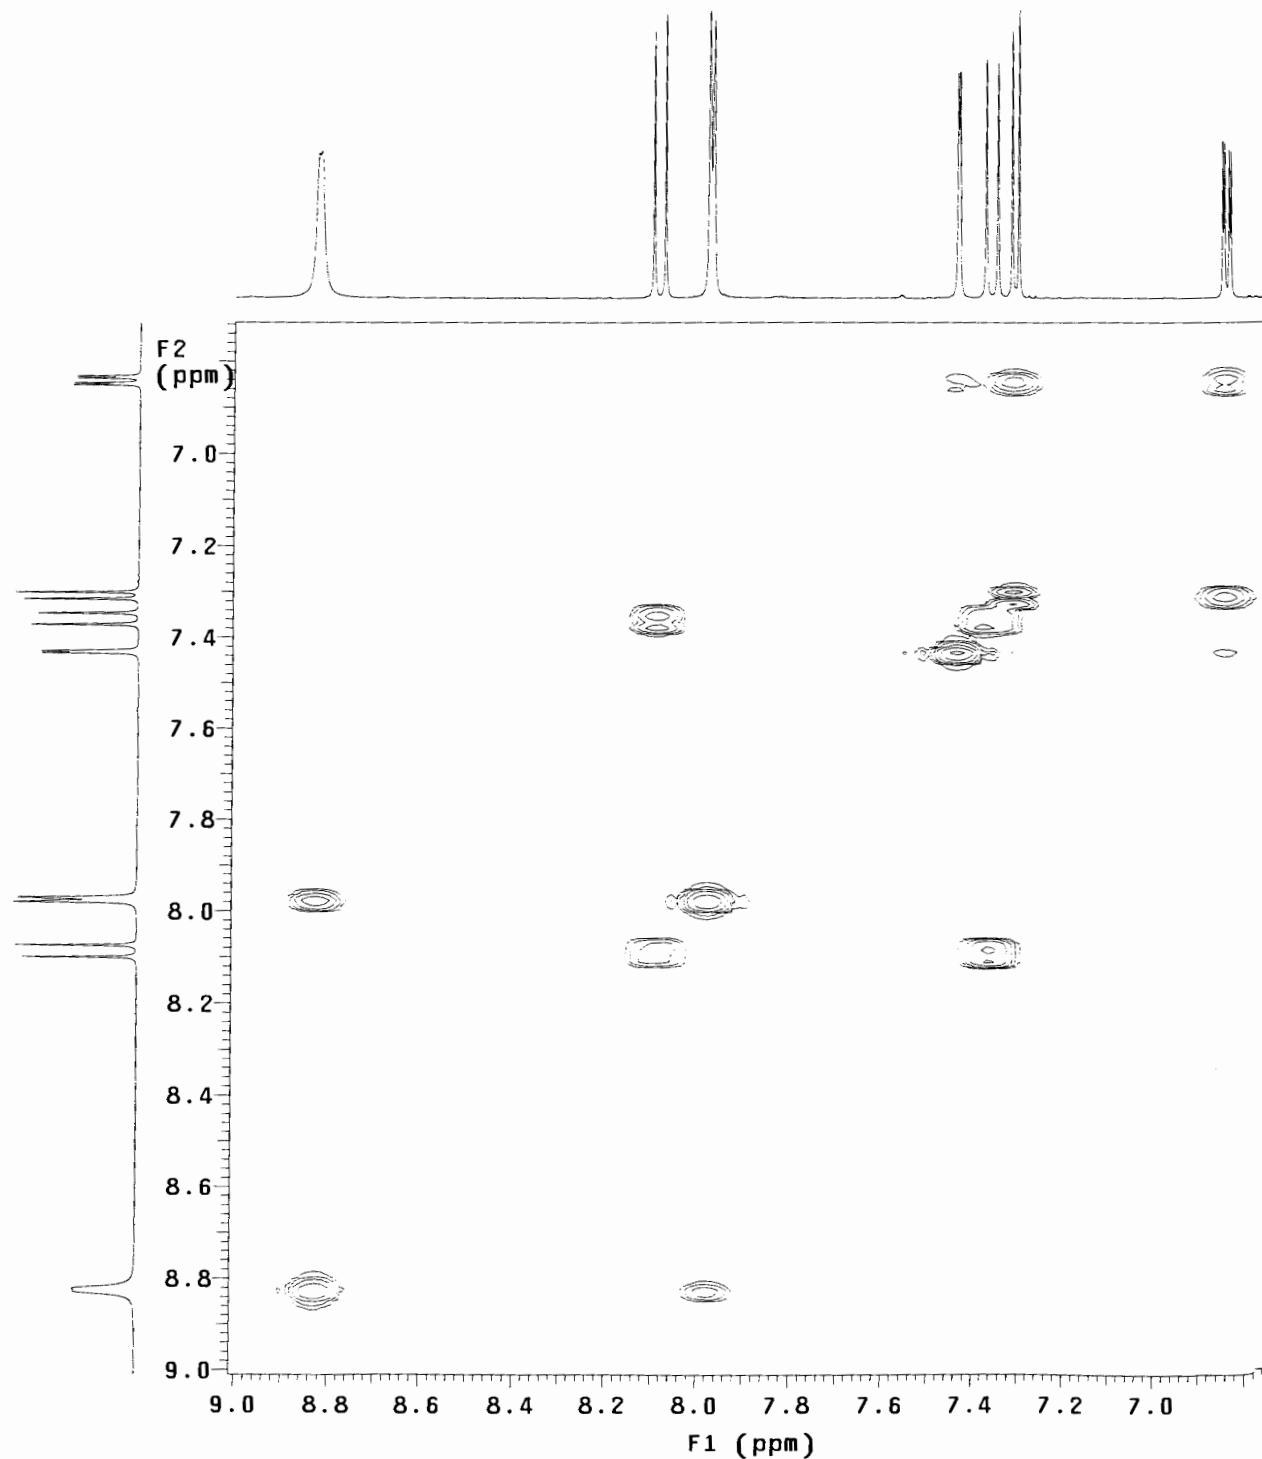



S41  
STANDARD 1H OBSERVE

Pulse Sequence: s2pu1

Solvent: DMSO  
Ambient temperature  
UNITY-400 "vxrs400"

Relax. delay 2.000 sec  
Pulse 47.4 degrees  
Acq. time 2.731 sec  
Width 5999.7 Hz  
32 repetitions  
OBSERVE H1, 399.9505719 MHz  
DATA PROCESSING  
Line broadening 0.5 Hz  
FT size 65536  
Total time 2 min, 31 sec

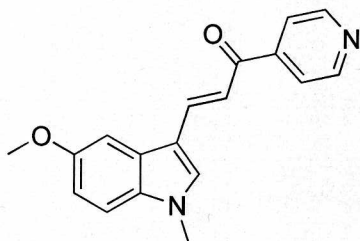

20

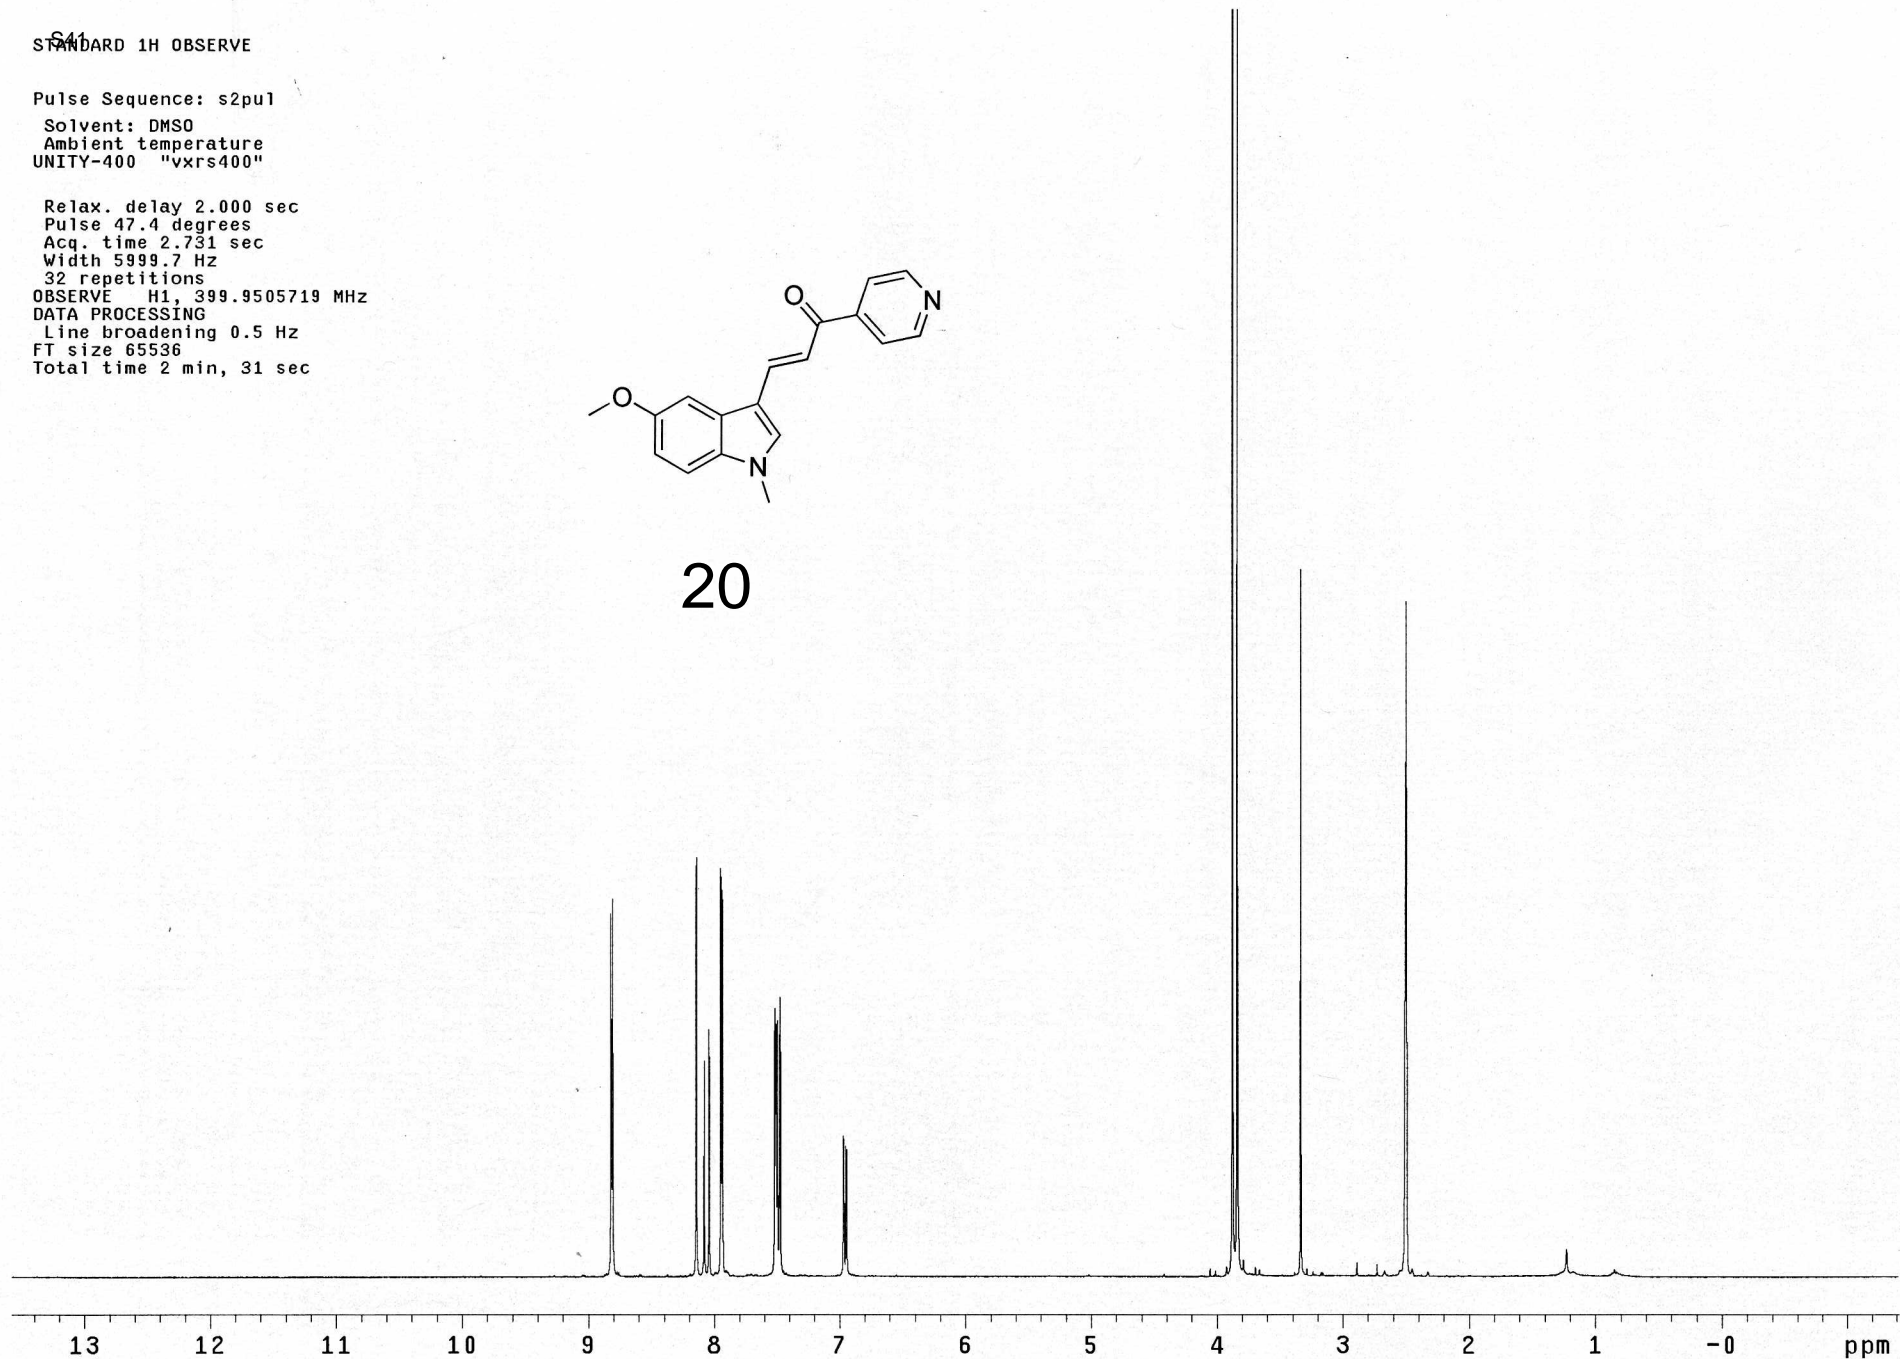

S42  
13C OBSERVE

Pulse Sequence: s2pu1

Solvent: DMSO  
Ambient temperature  
UNITY-400 "vxrs400"

Relax. delay 0.100 sec  
Pulse 60.6 degrees  
Acq. time 1.205 sec  
Width 27192.4 Hz  
4944 repetitions

OBSERVE C13, 100.5676951 MHz  
DECOUPLE H1, 399.9530039 MHz

Low power 3 dB atten.  
continuously on  
WALTZ-16 modulated

DATA PROCESSING

Line broadening 0.5 Hz  
Gauss window 0.500 sec  
center at 0.100 sec

FT size 131072

Total time 36 hr, 33 min, 9 sec

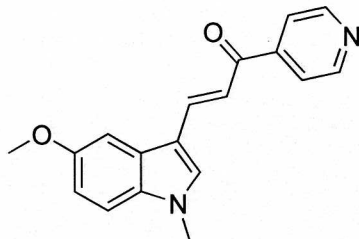

20

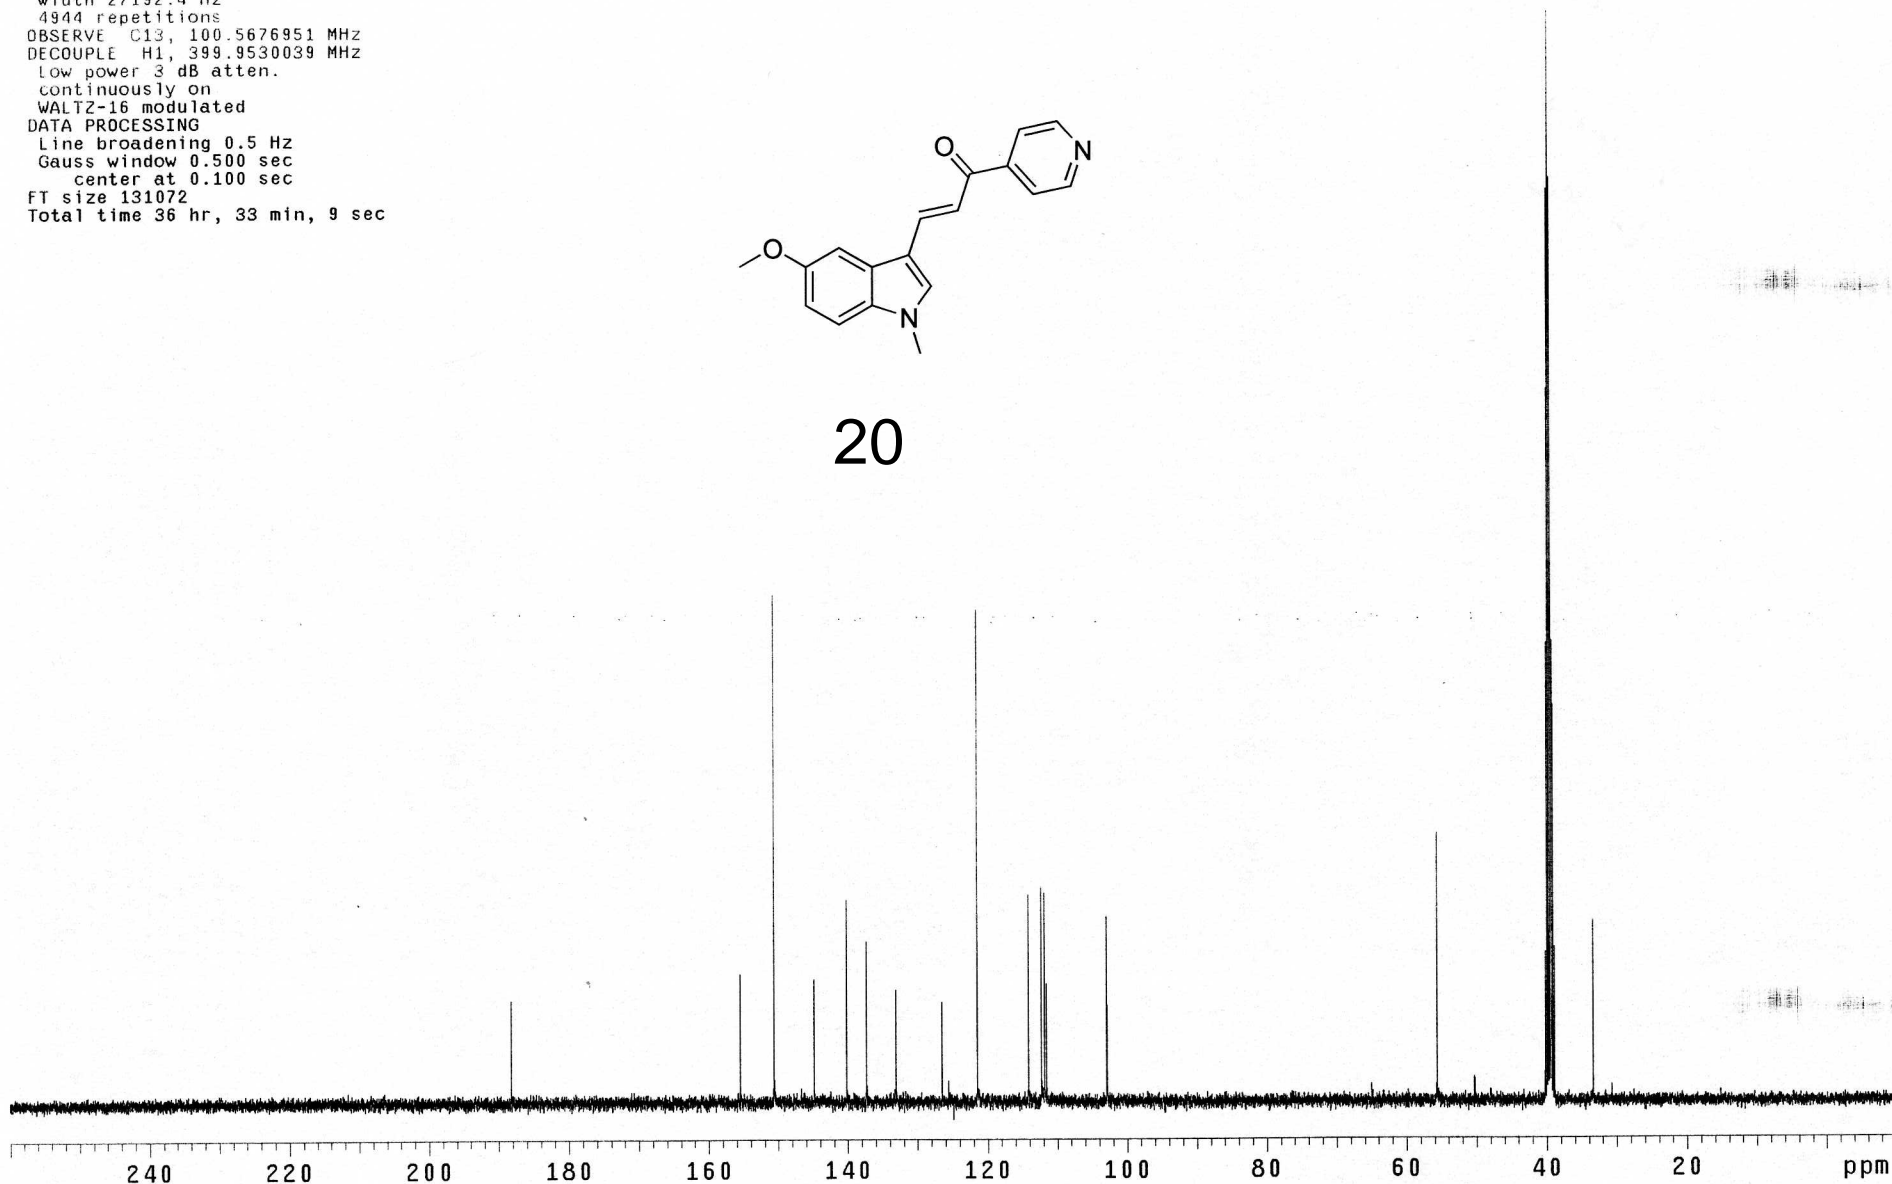

S43

STANDARD PROTON PARAMETERS

Pulse Sequence: s2pu1  
Solvent: DMSO  
Ambient temperature  
INOVA-600 "inova600"

Relax. delay 1.000 sec  
Pulse 31.8 degrees  
Acq. time 3.000 sec  
Width 8999.9 Hz  
16 repetitions  
OBSERVE H1, 599.8751446 MHz  
DATA PROCESSING  
Line broadening 0.4 Hz  
FT size 131072  
Total time 1 min, 4 sec

Aug 12 2010

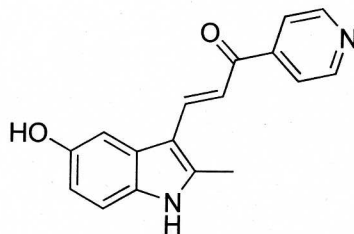

21

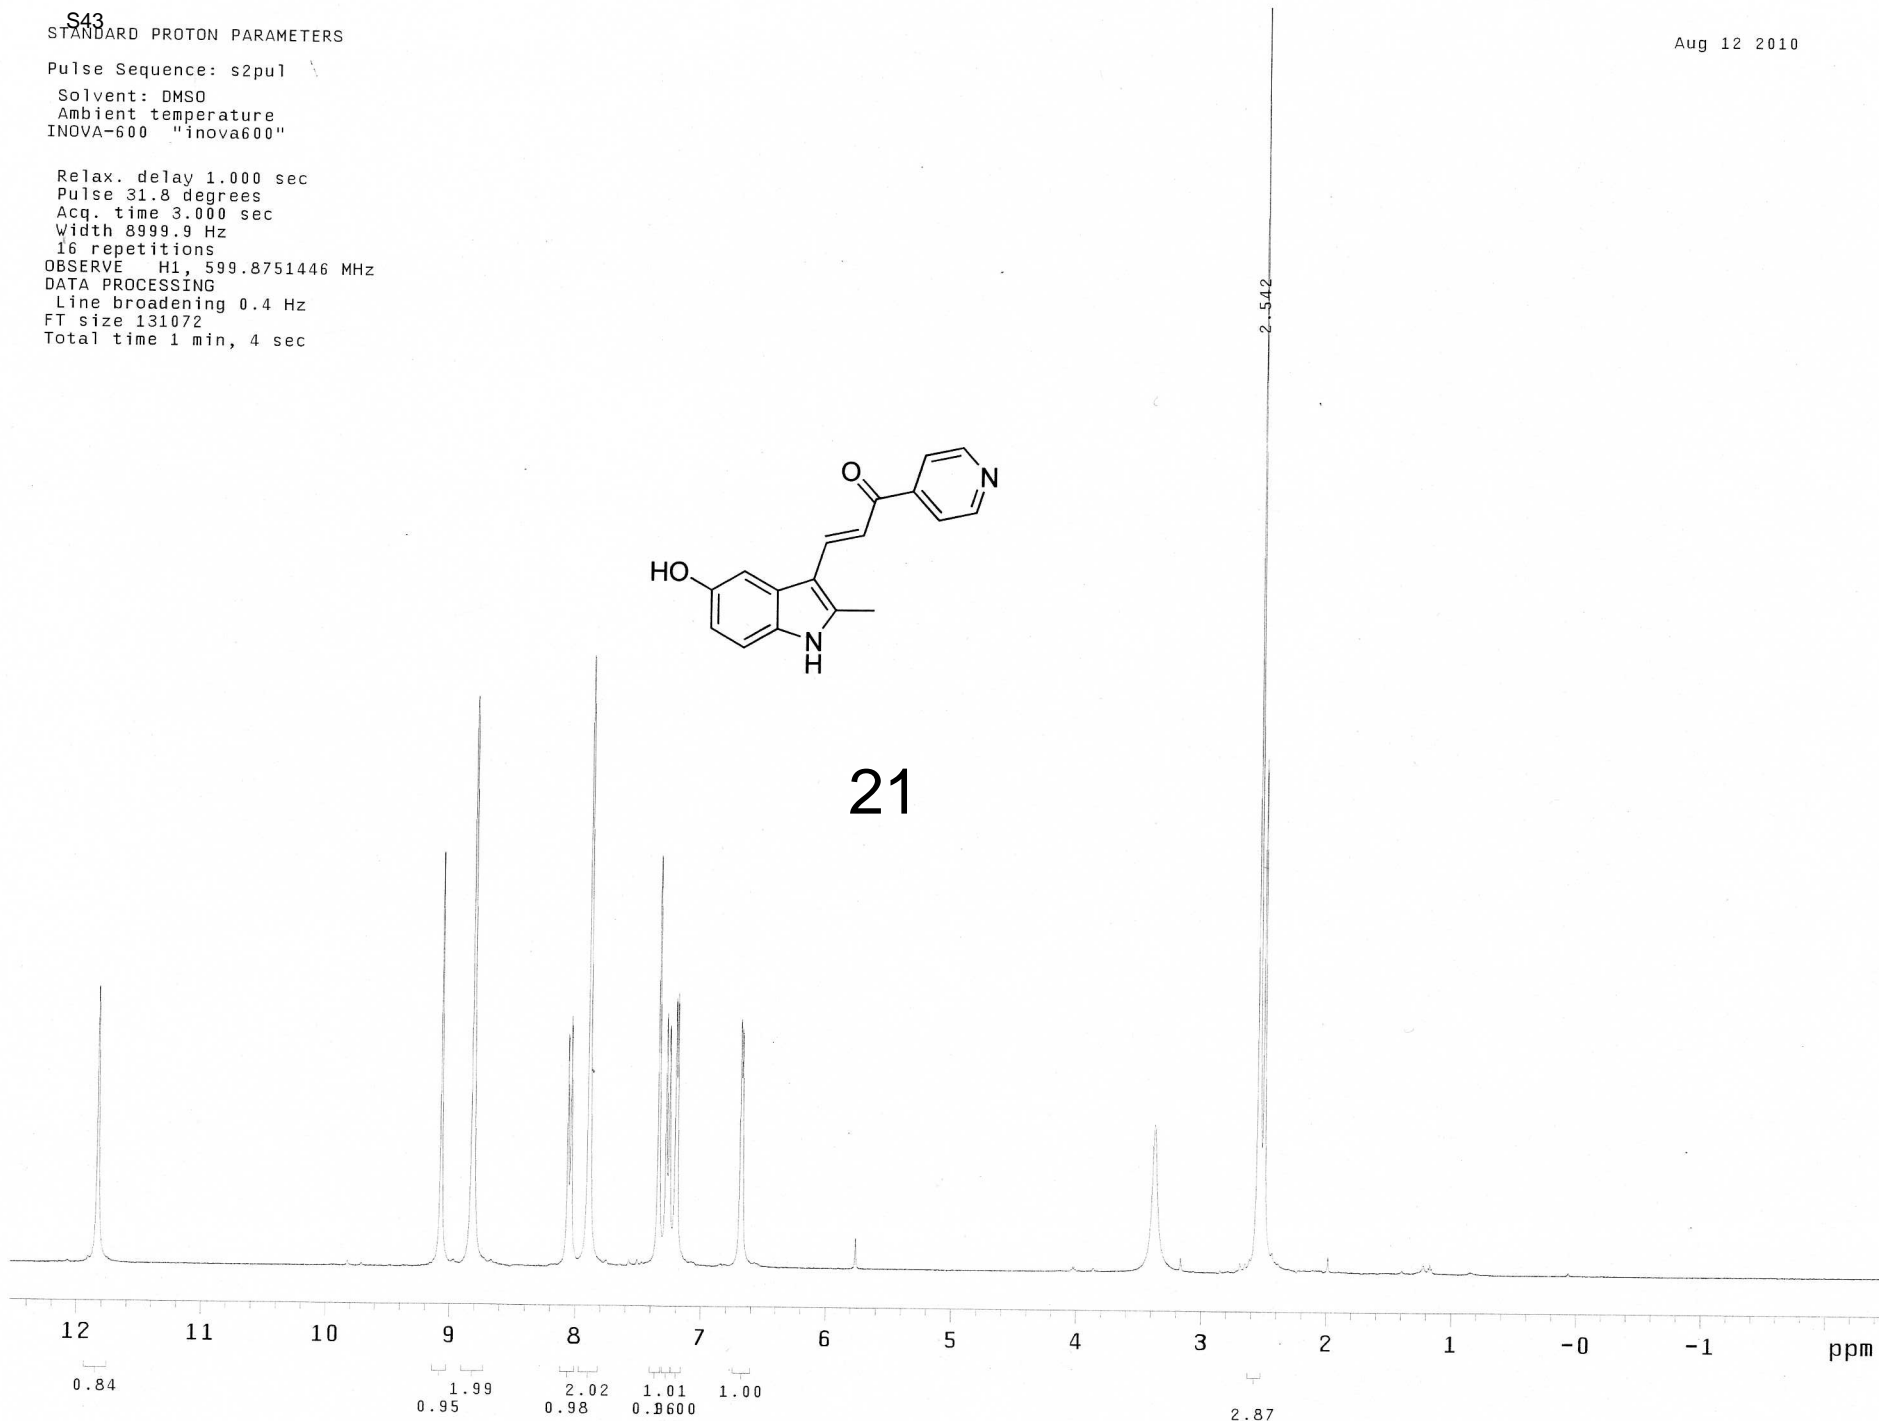

S44

STANDARD CARBON PARAMETERS

Aug 12 2010

Pulse Sequence: s2pu1

Solvent: DMSO

Ambient temperature

User: 1-14-87

INOVA-600 "inova600"

Pulse 46.4 degrees

Acq. time 1.000 sec

Width 37735.8 Hz

2576 repetitions

OBSERVE C13, 150.8387896 MHz

DECOUPLE H1, 599.8781638 MHz

Power 32 dB

continuously on

WALTZ-16 modulated

DATA PROCESSING

Gauss window 0.600 sec

center at 0.100 sec

FT size 524288

Total time 28 hr, 1 min, 31 sec

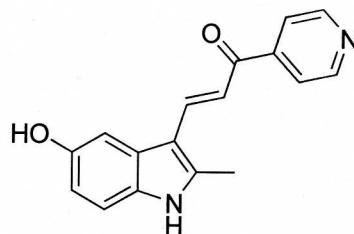

21

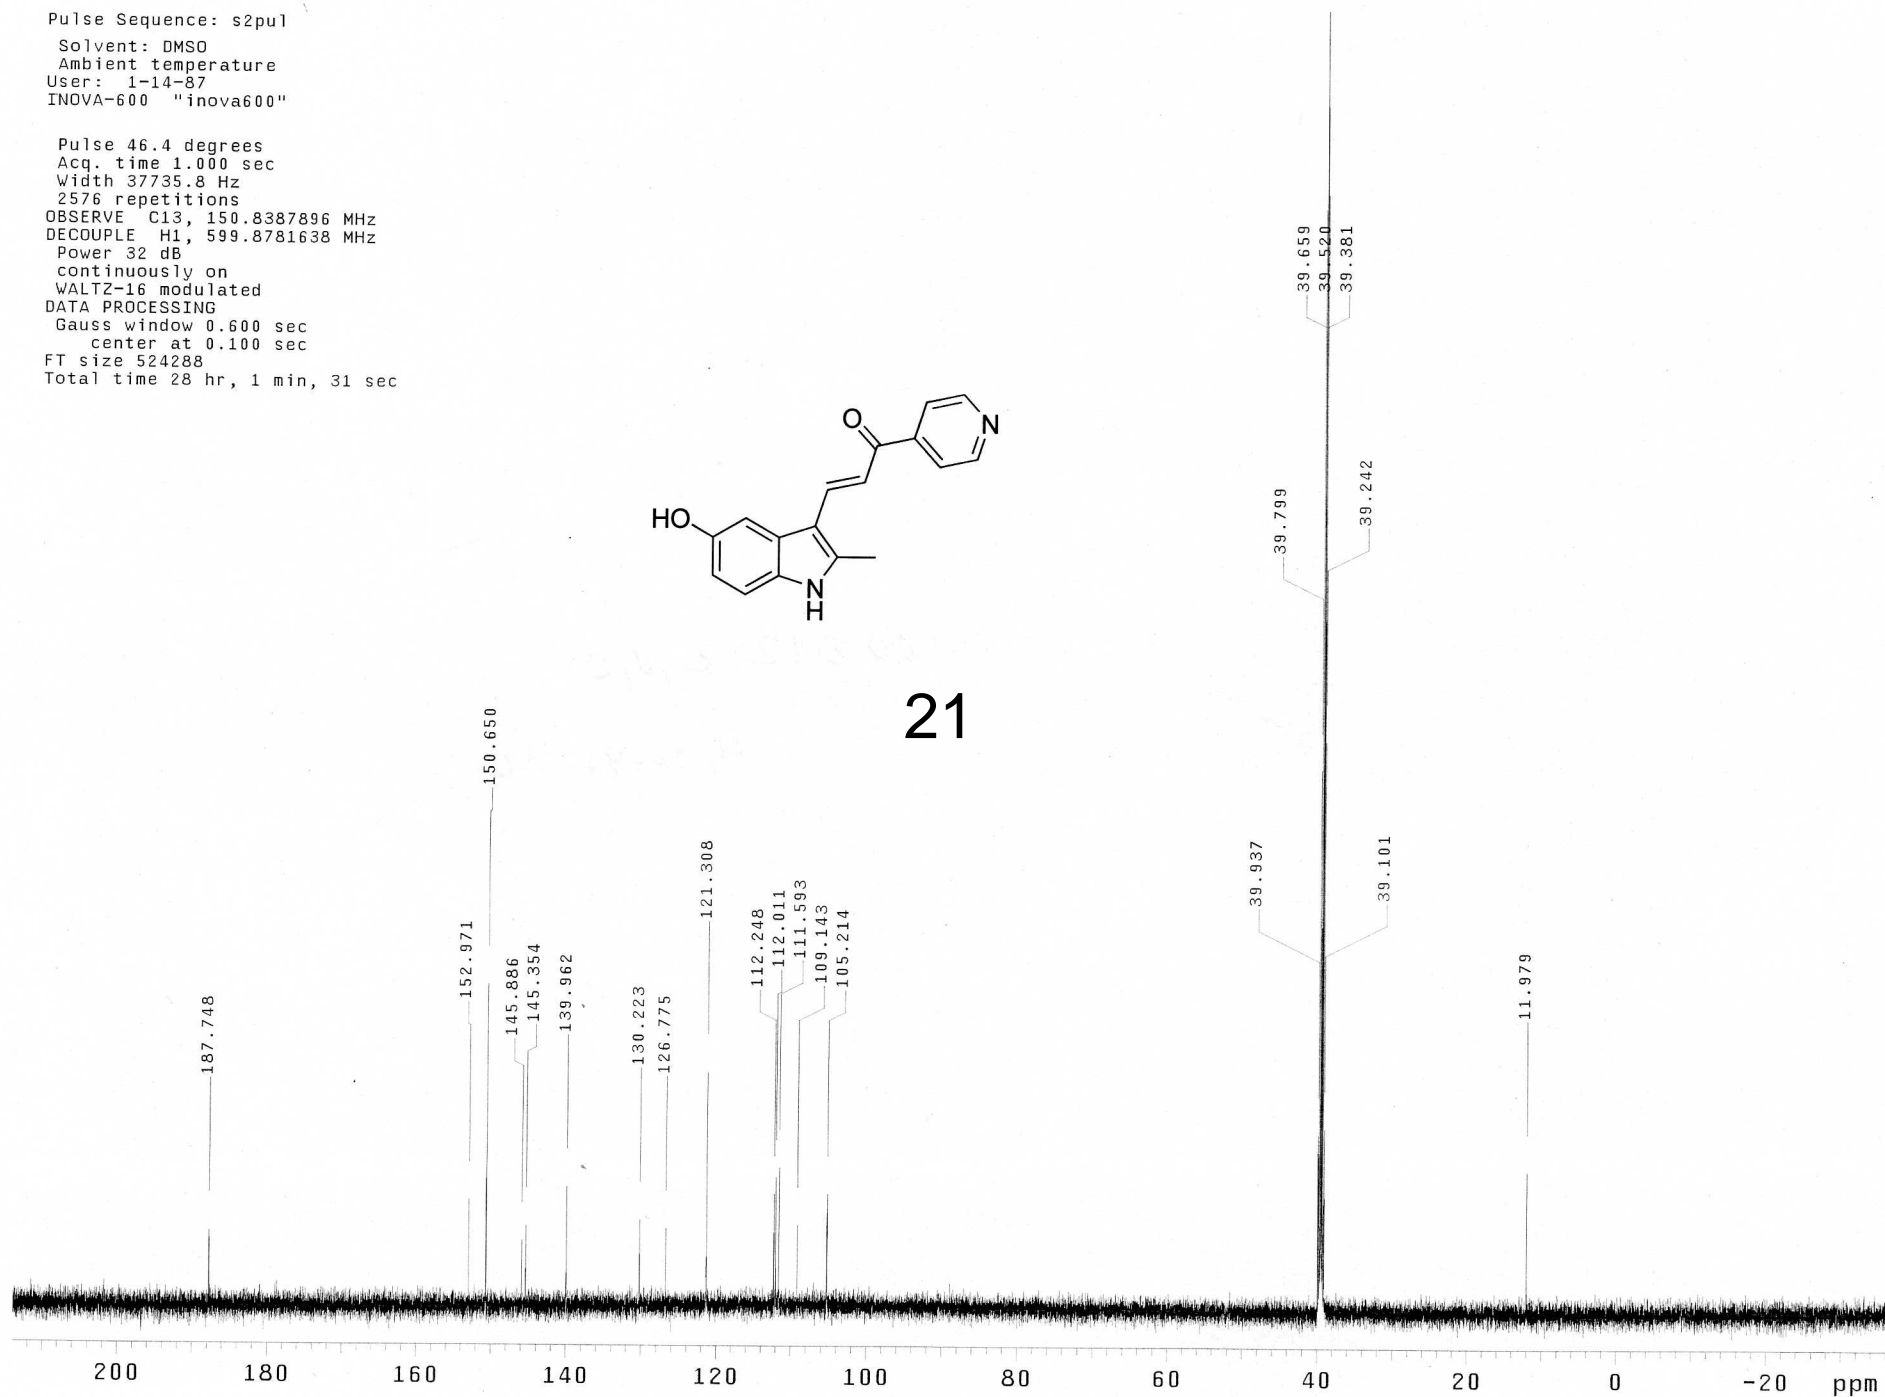

S45

STANDARD PROTON PARAMETERS

Pulse Sequence: gcosy

Solvent: DMSO  
Ambient temperature  
INOVA-600 "inova600"

Relax. delay 1.000 sec  
Acq. time 0.213 sec  
Width 2400.7 Hz  
2D Width 2400.7 Hz  
Single scan

256 increments  
OBSERVE H1, 599.8751446 MHz

DATA PROCESSING

Sine bell 0.107 sec

F1 DATA PROCESSING

Sine bell 0.053 sec

FT size 1024 x 1024

Total time 5 min, 30 sec

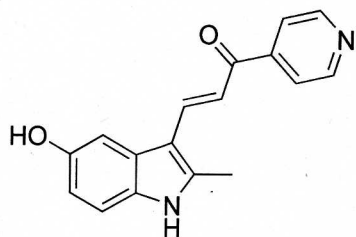

21

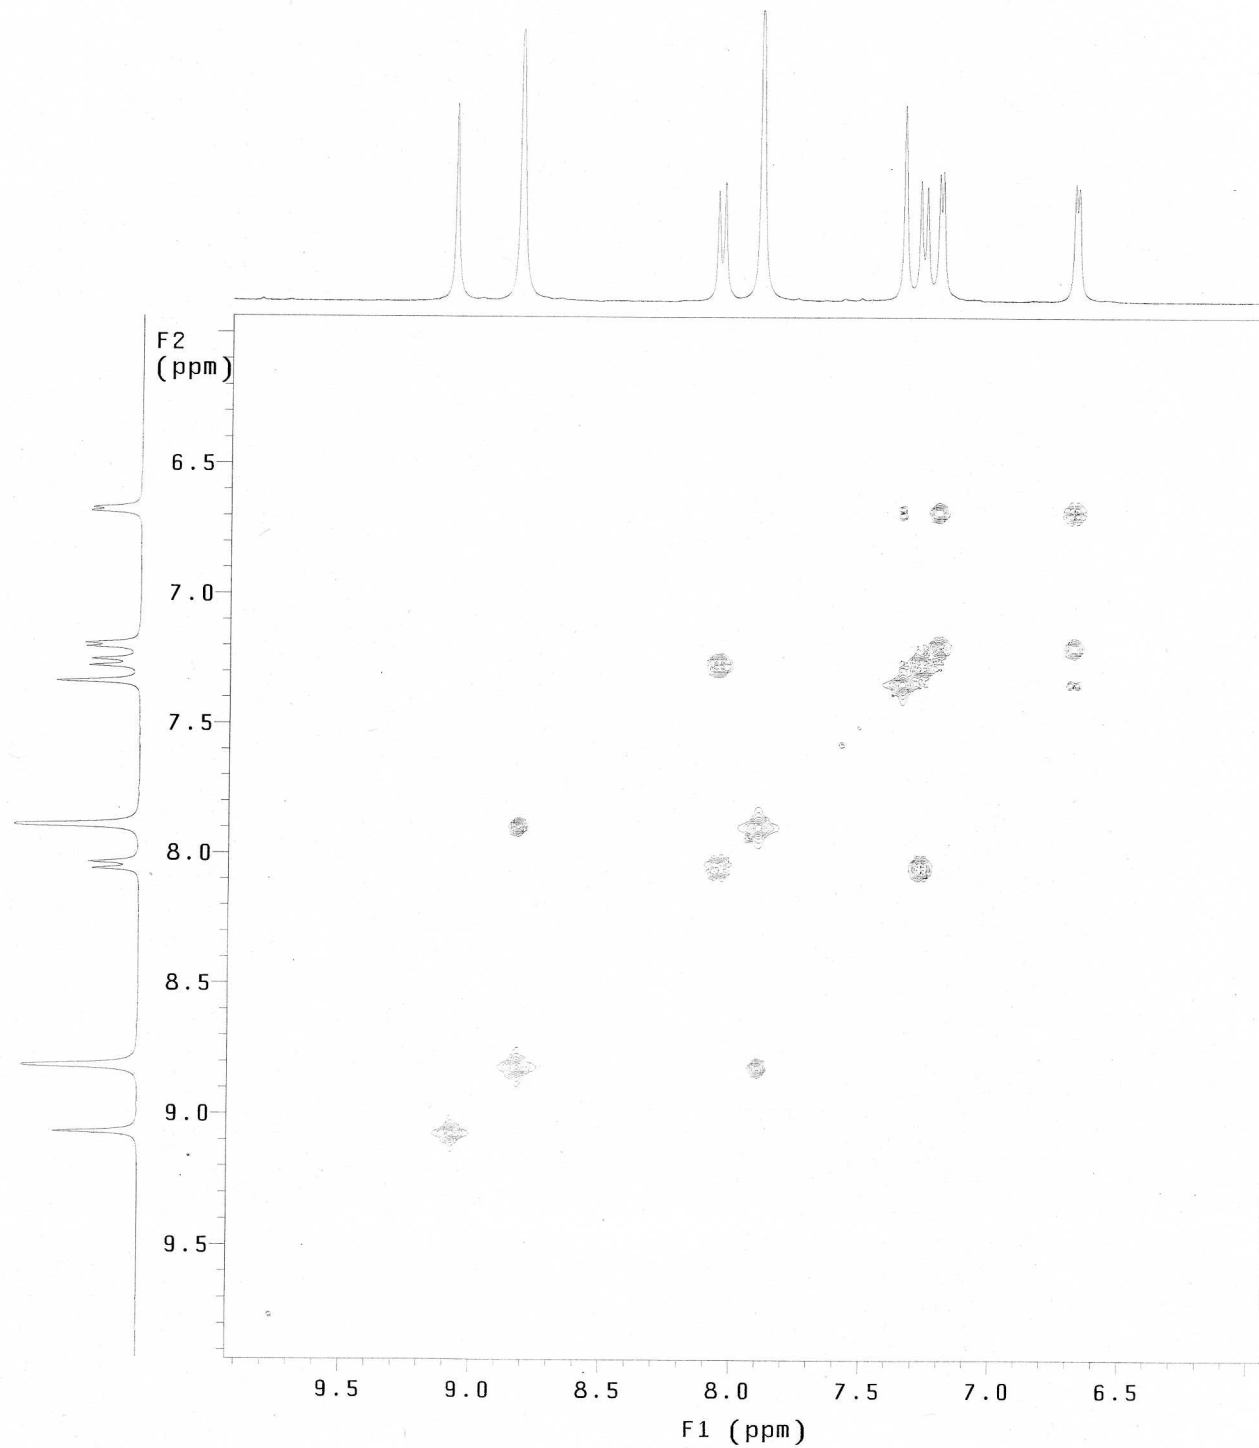

S46

STANDARD PROTON PARAMETERS

Pulse Sequence: s2pu1

Solvent: DMSO  
Ambient temperature  
File: 100823a  
INOVA-600 "inova600"

Relax. delay 1.000 sec  
Pulse 31.8 degrees  
Acq. time 3.000 sec  
Width 8999.9 Hz  
16 repetitions  
OBSERVE H1, 599.8751449 MHz  
DATA PROCESSING  
Line broadening 0.4 Hz  
FT size 131072  
Total time 1 min, 4 sec

P173

Aug 23 2010

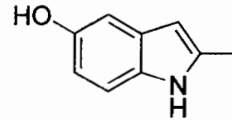

22

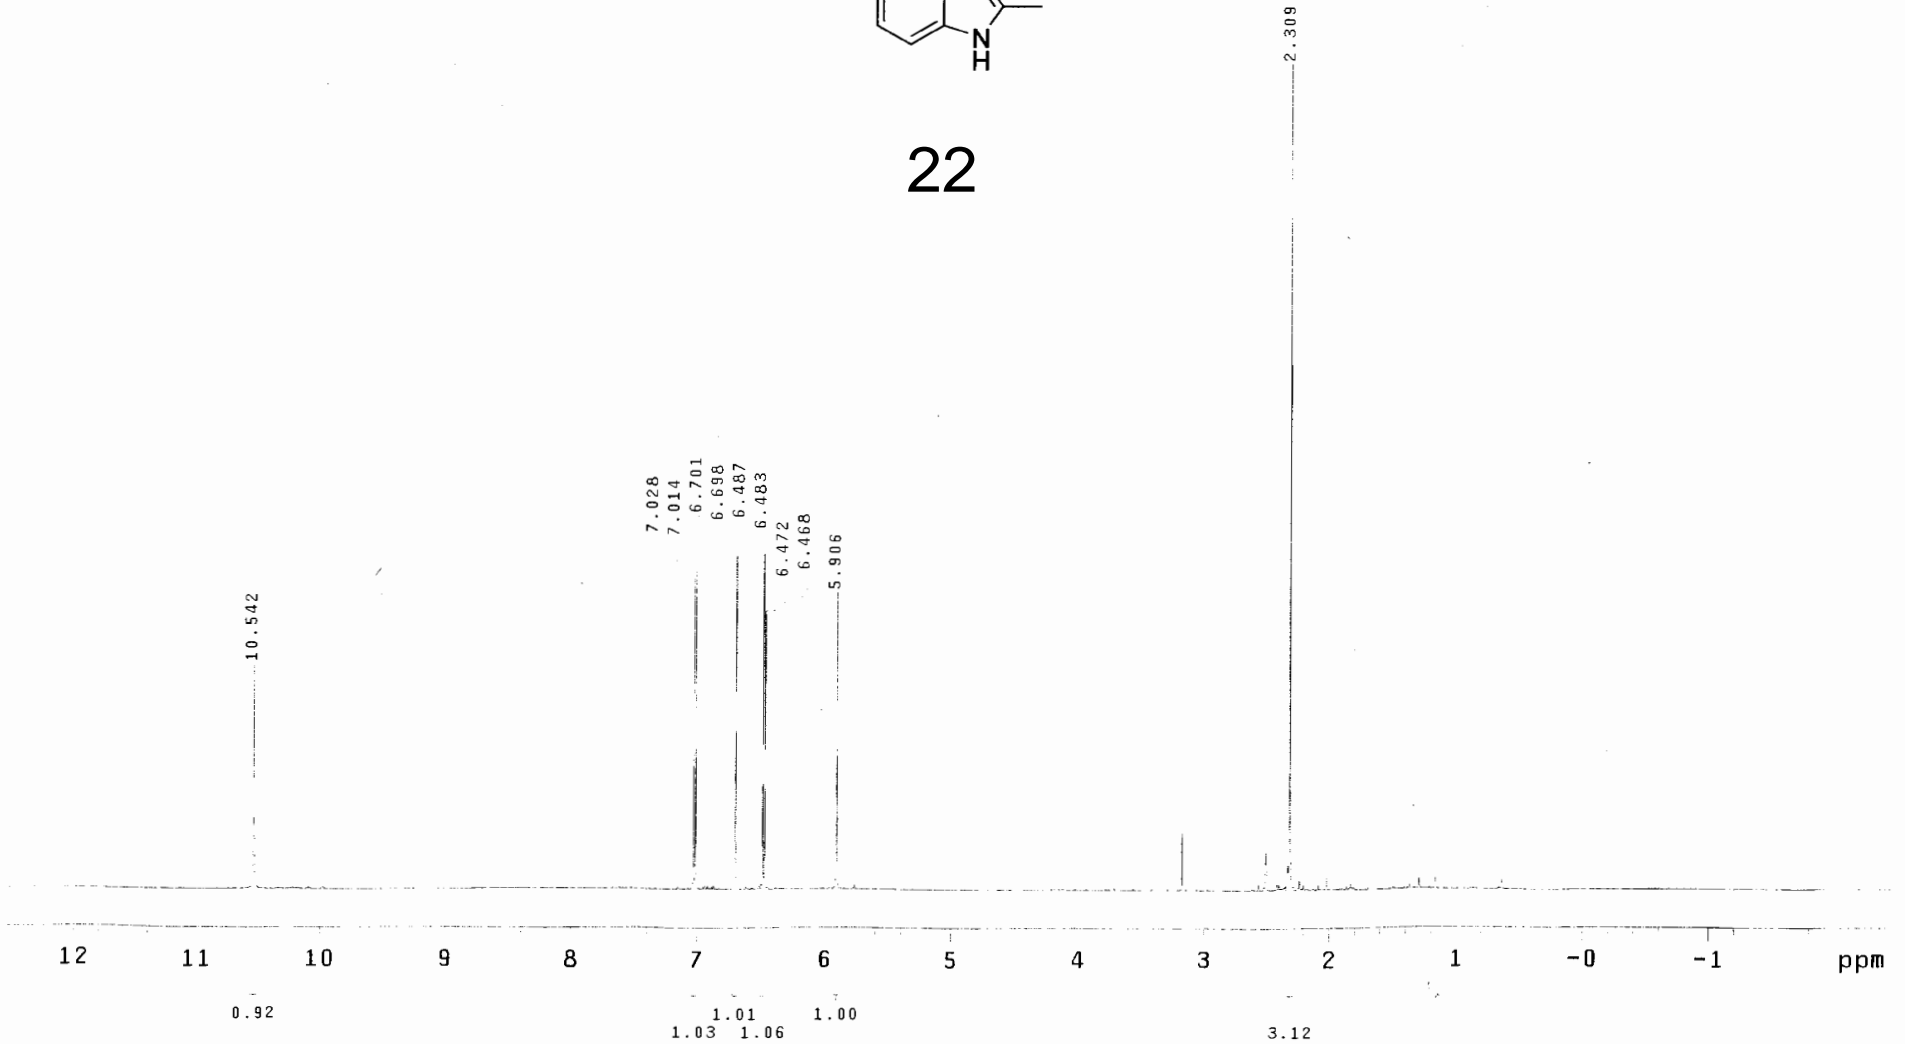

S47

STANDARD CARBON PARAMETERS

Aug 23 2010

Pulse Sequence: s2pul

Solvent: DMSO  
Ambient temperature  
User: 1-14-87  
INOVA-600 "inova600"

Pulse 46.4 degrees  
Acq. time 1.000 sec  
Width 37735.8 Hz  
1440 repetitions  
OBSERVE C13, 150.8387893 MHz  
DECOUPLE H1, 599.8781638 MHz  
Power 32 dB  
continuously on  
WALTZ-16 modulated  
DATA PROCESSING  
Gauss window 0.600 sec  
center at 0.100 sec  
FT size 524288  
Total time 28 hr, 1 min, 31 sec

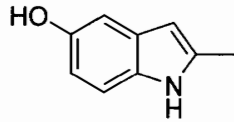

22

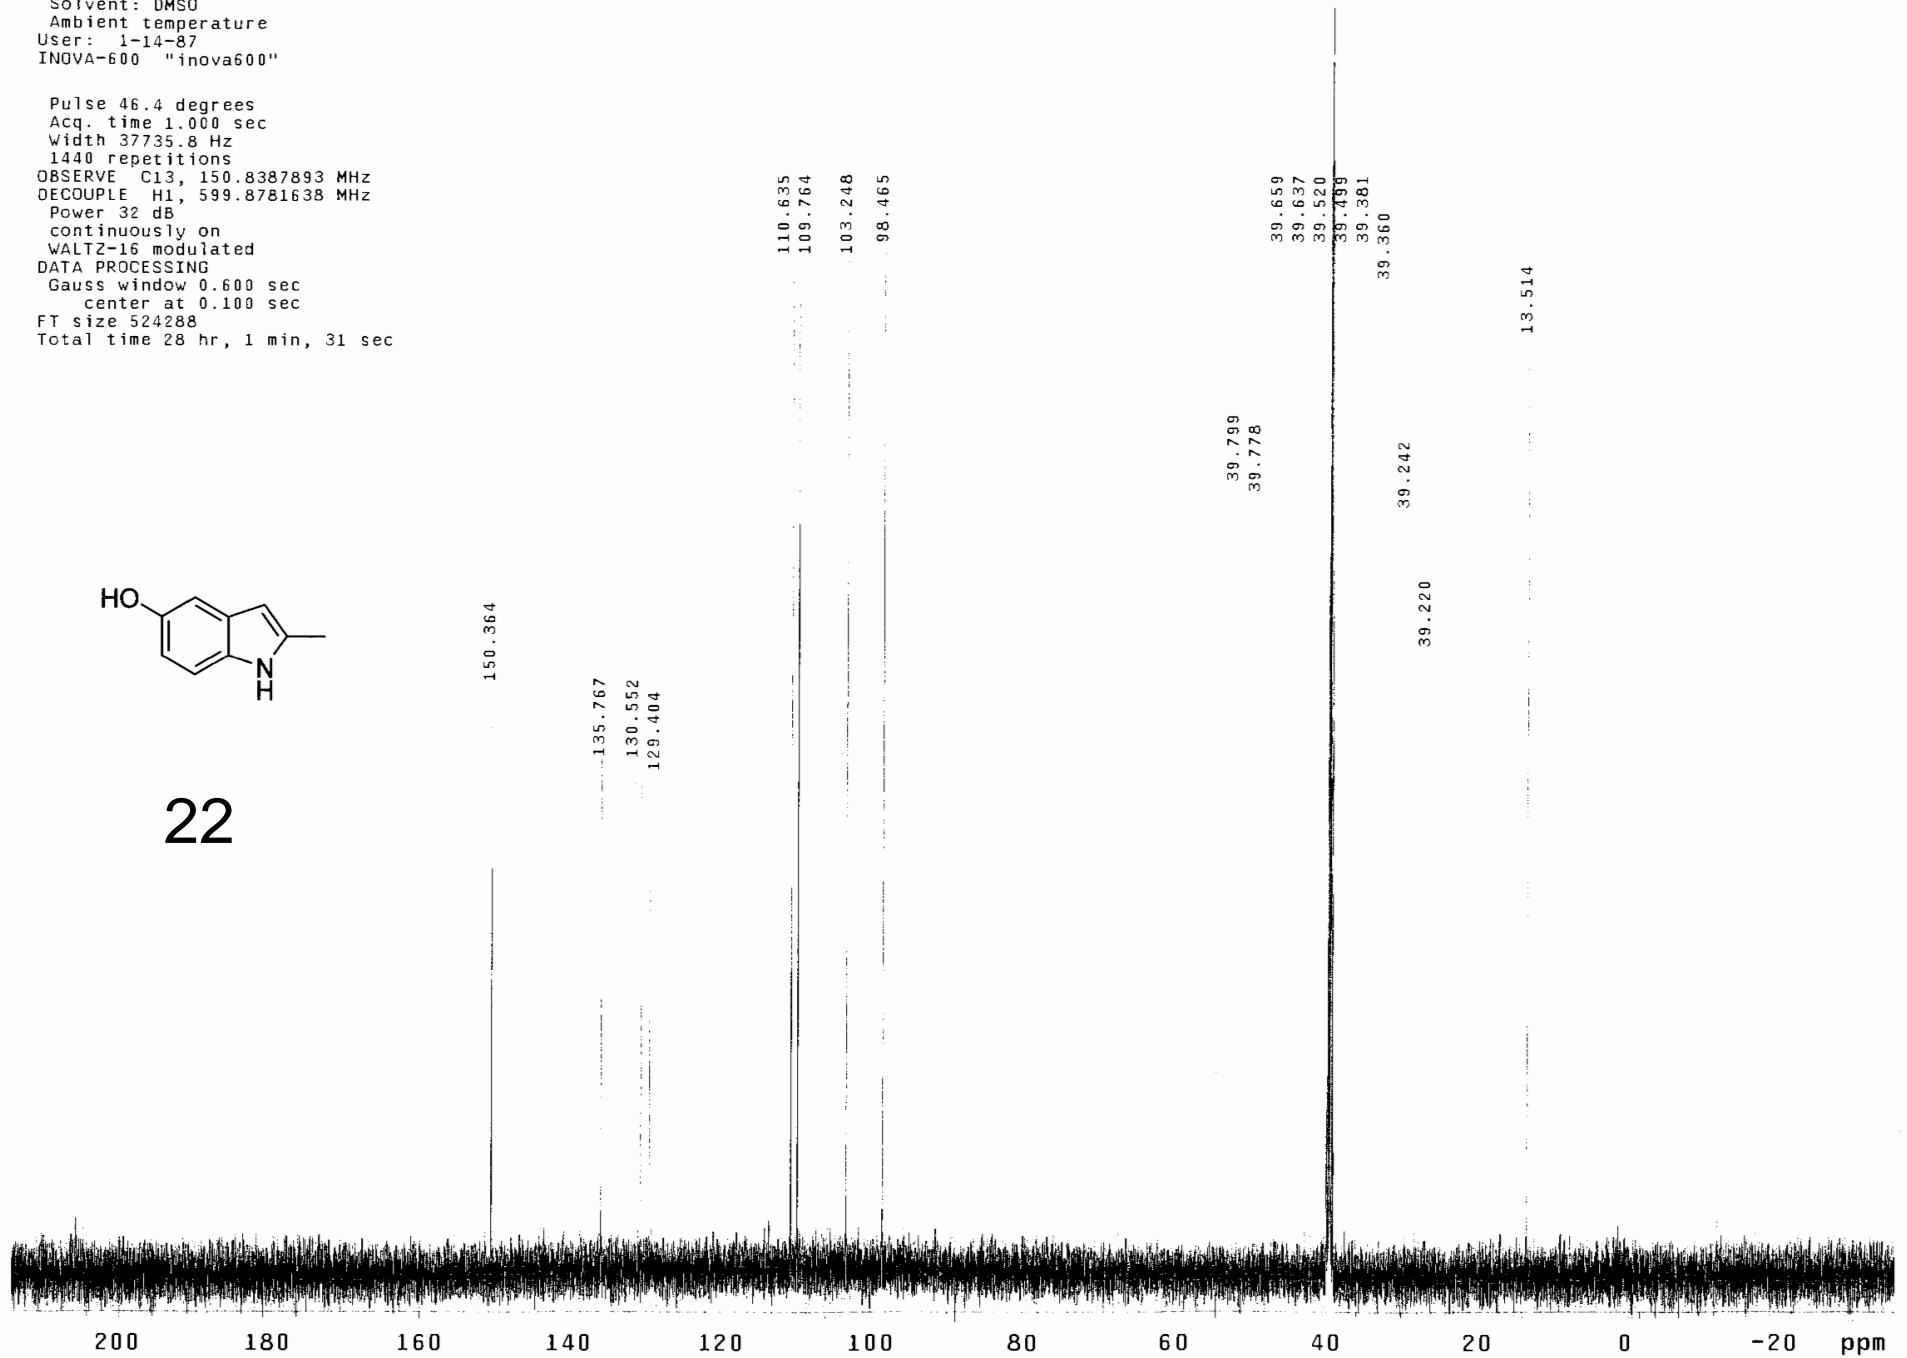

S48

STANDARD PROTON PARAMETERS

Pulse Sequence: gcosy

Solvent: DMSD  
Ambient temperature  
File: 100823b  
INOVA-600 "inova600"

Relax. delay 1.000 sec  
Acq. time 0.159 sec  
Width 1608.4 Hz  
2D Width 1608.4 Hz  
Single scan  
128 increments  
OBSERVE H1, 599.8751449 MHz  
DATA PROCESSING  
Sine bell 0.080 sec  
F1 DATA PROCESSING  
Sine bell 0.040 sec  
FT size 512 x 512  
Total time 2 min, 37 sec

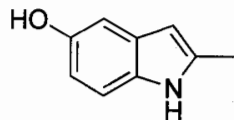

22

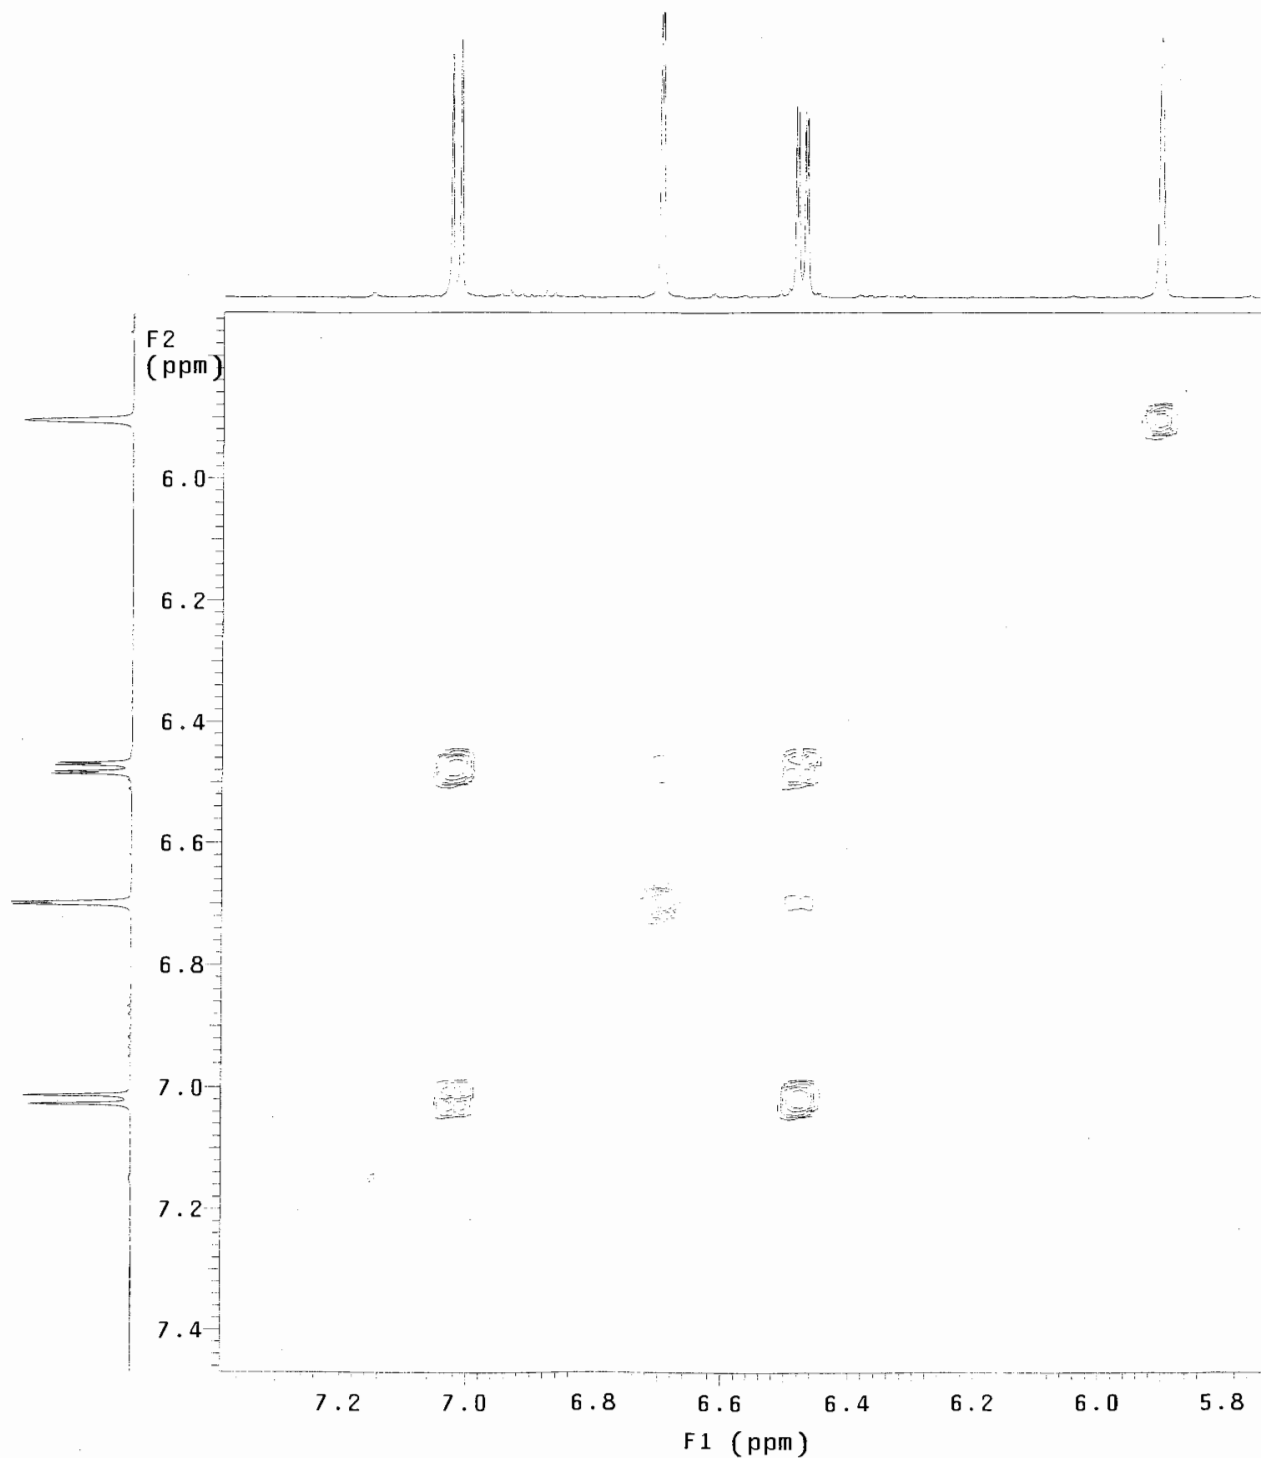



S49

STANDARD 1H OBSERVE

Pulse Sequence: s2pu1

Solvent: DMSO  
Ambient temperature  
File: 101022b  
INOVA-600 "inova-wkst"

Relax. delay 2.000 sec  
Pulse 31.9 degrees  
Acq. time 2.500 sec  
Width 3000.3 Hz  
32 repetitions  
OBSERVE H1, 199.9760204 MHz  
DATA PROCESSING  
Line broadening 0.3 Hz  
FT size 65536  
Total time 2 min, 24 sec

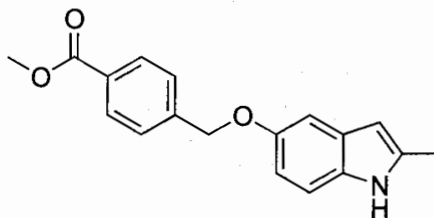

23

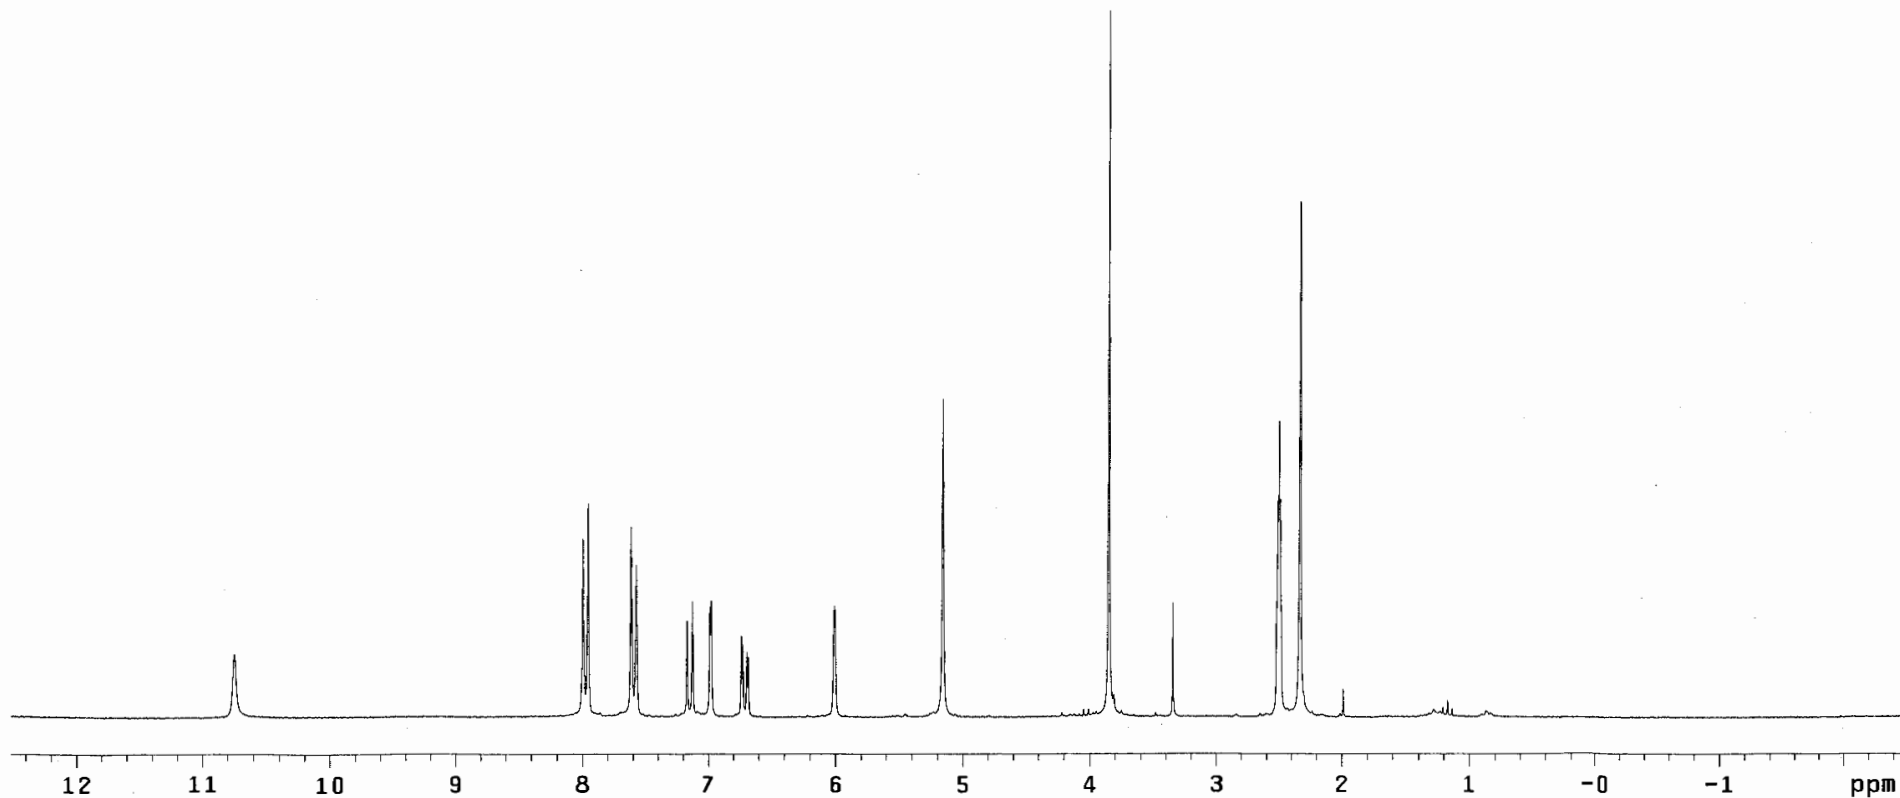

S50

STANDARD CARBON PARAMETERS

Pulse Sequence: s2pu1

Solvent: DMSO  
Ambient temperature  
User: 1-14-87  
File: 101119a  
INOVA-600 "inova-wkst"

Pulse 46.4 degrees  
Acq. time 1.000 sec  
Width 37735.8 Hz  
31264 repetitions  
OBSERVE C13, 150.8387949 MHz  
DECOUPLE H1, 599.8781638 MHz  
Power 32 dB  
continuously on  
WALTZ-16 modulated  
DATA PROCESSING  
Gauss window 0.600 sec  
center at 0.100 sec  
FT size 524288  
Total time 28 hr, 1 min, 31 sec

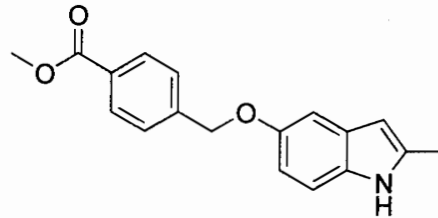

23

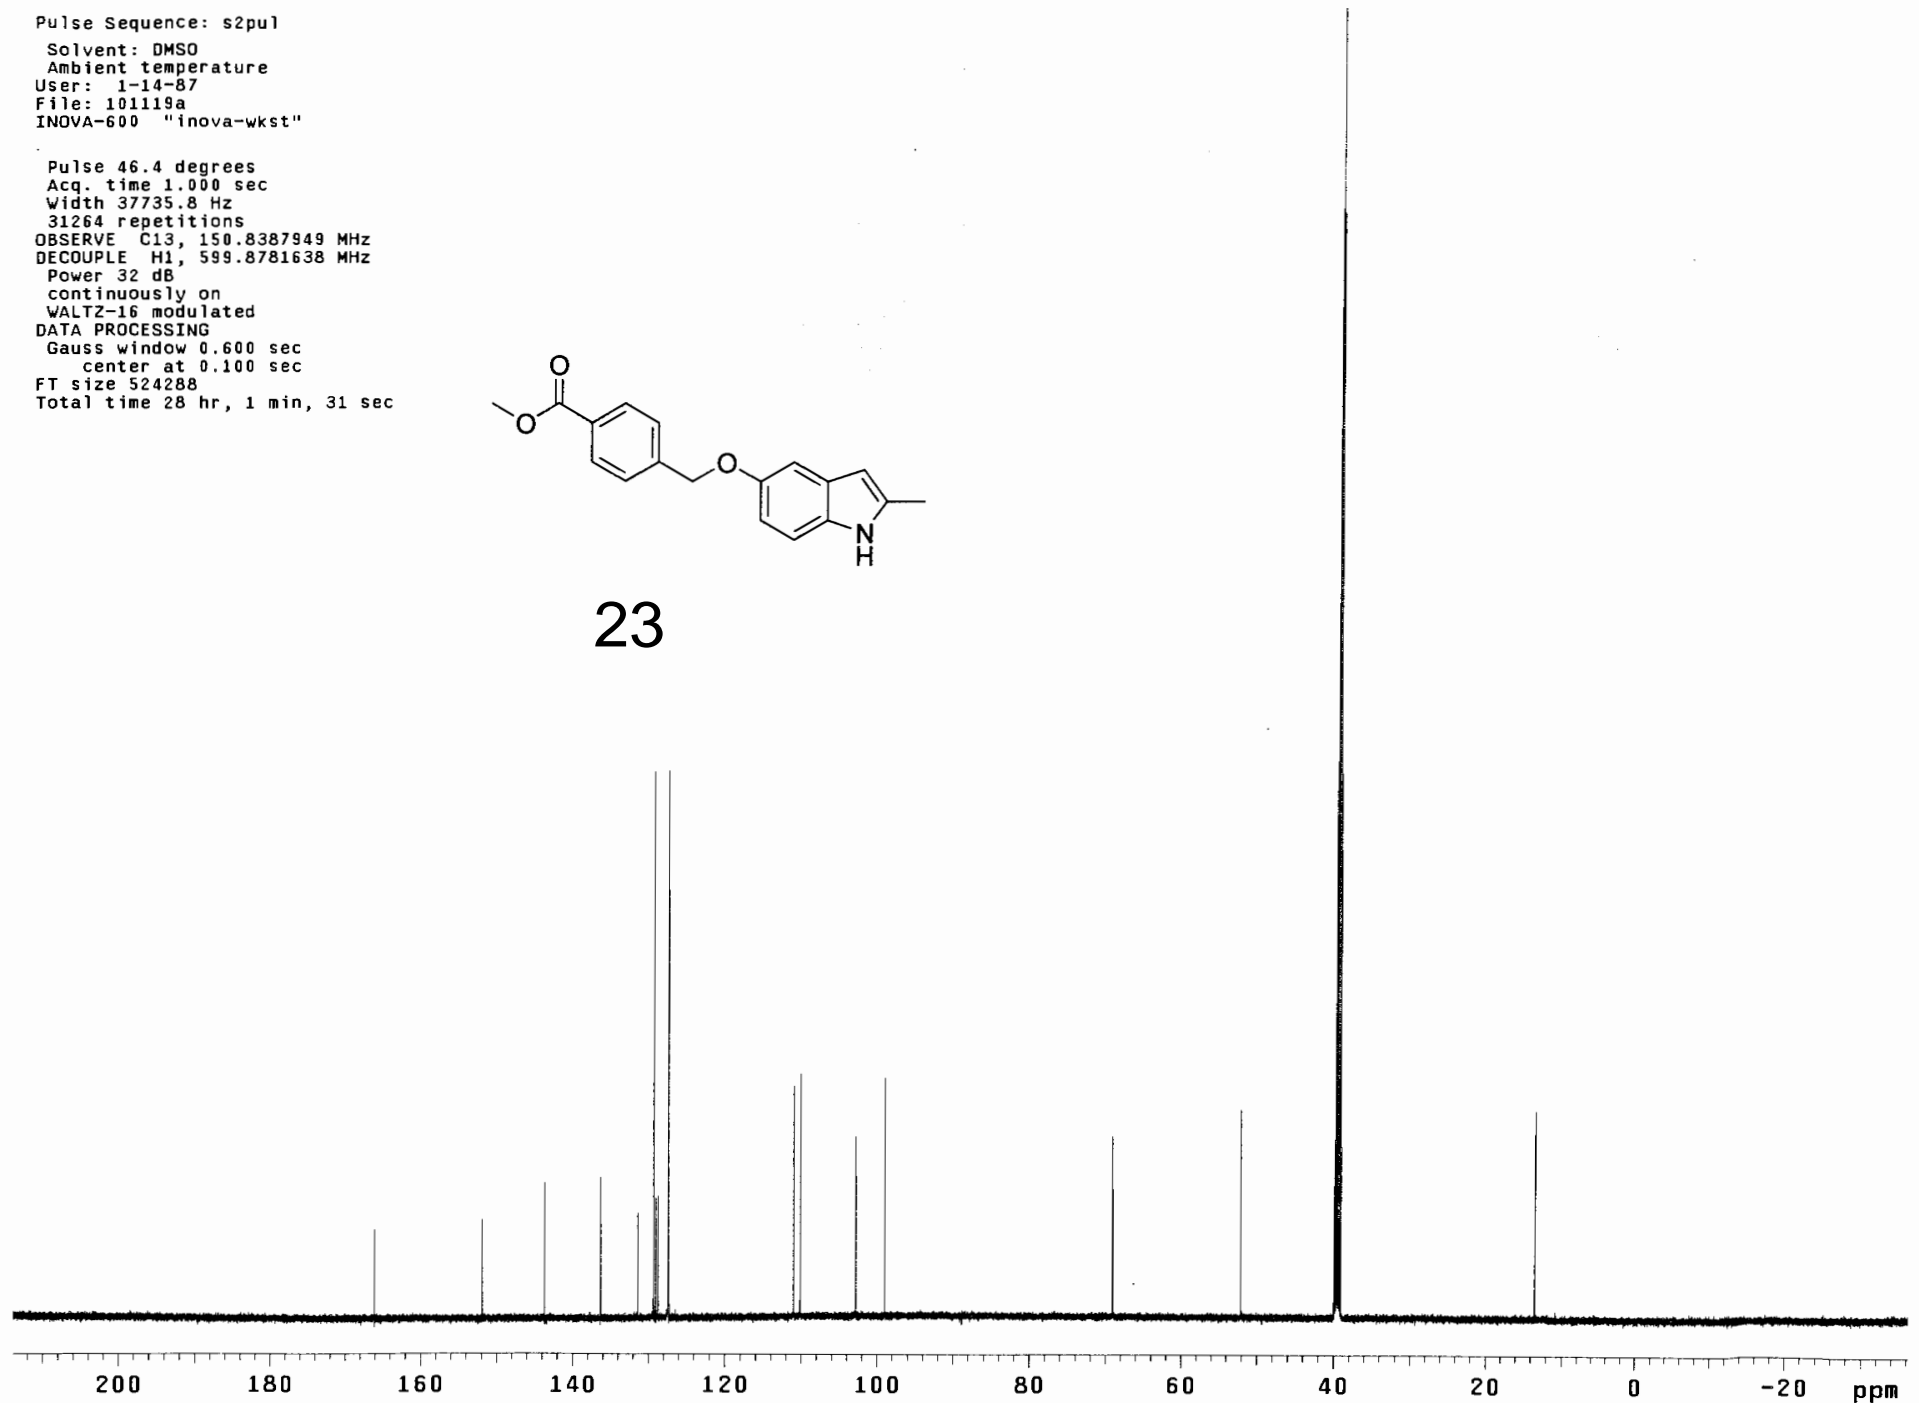

S51

STANDARD 1H OBSERVE

Pulse Sequence: relayh

Solvent: DMSO  
Ambient temperature  
File: 101022c  
INOVA-600 "inova-wkst"

Relax. delay 1.000 sec  
COSY 90-90  
Acq. time 0.180 sec  
Width 354.8 Hz  
2D Width 354.8 Hz  
4 repetitions  
64 increments

OBSERVE H1, 199.9760204 MHz  
DATA PROCESSING  
Sine bell 0.090 sec  
F1 DATA PROCESSING  
Sine bell 0.090 sec  
FT size 128 x 128  
Total time 5 min, 29 sec

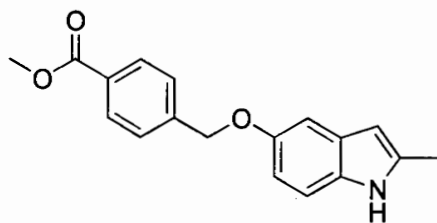

23

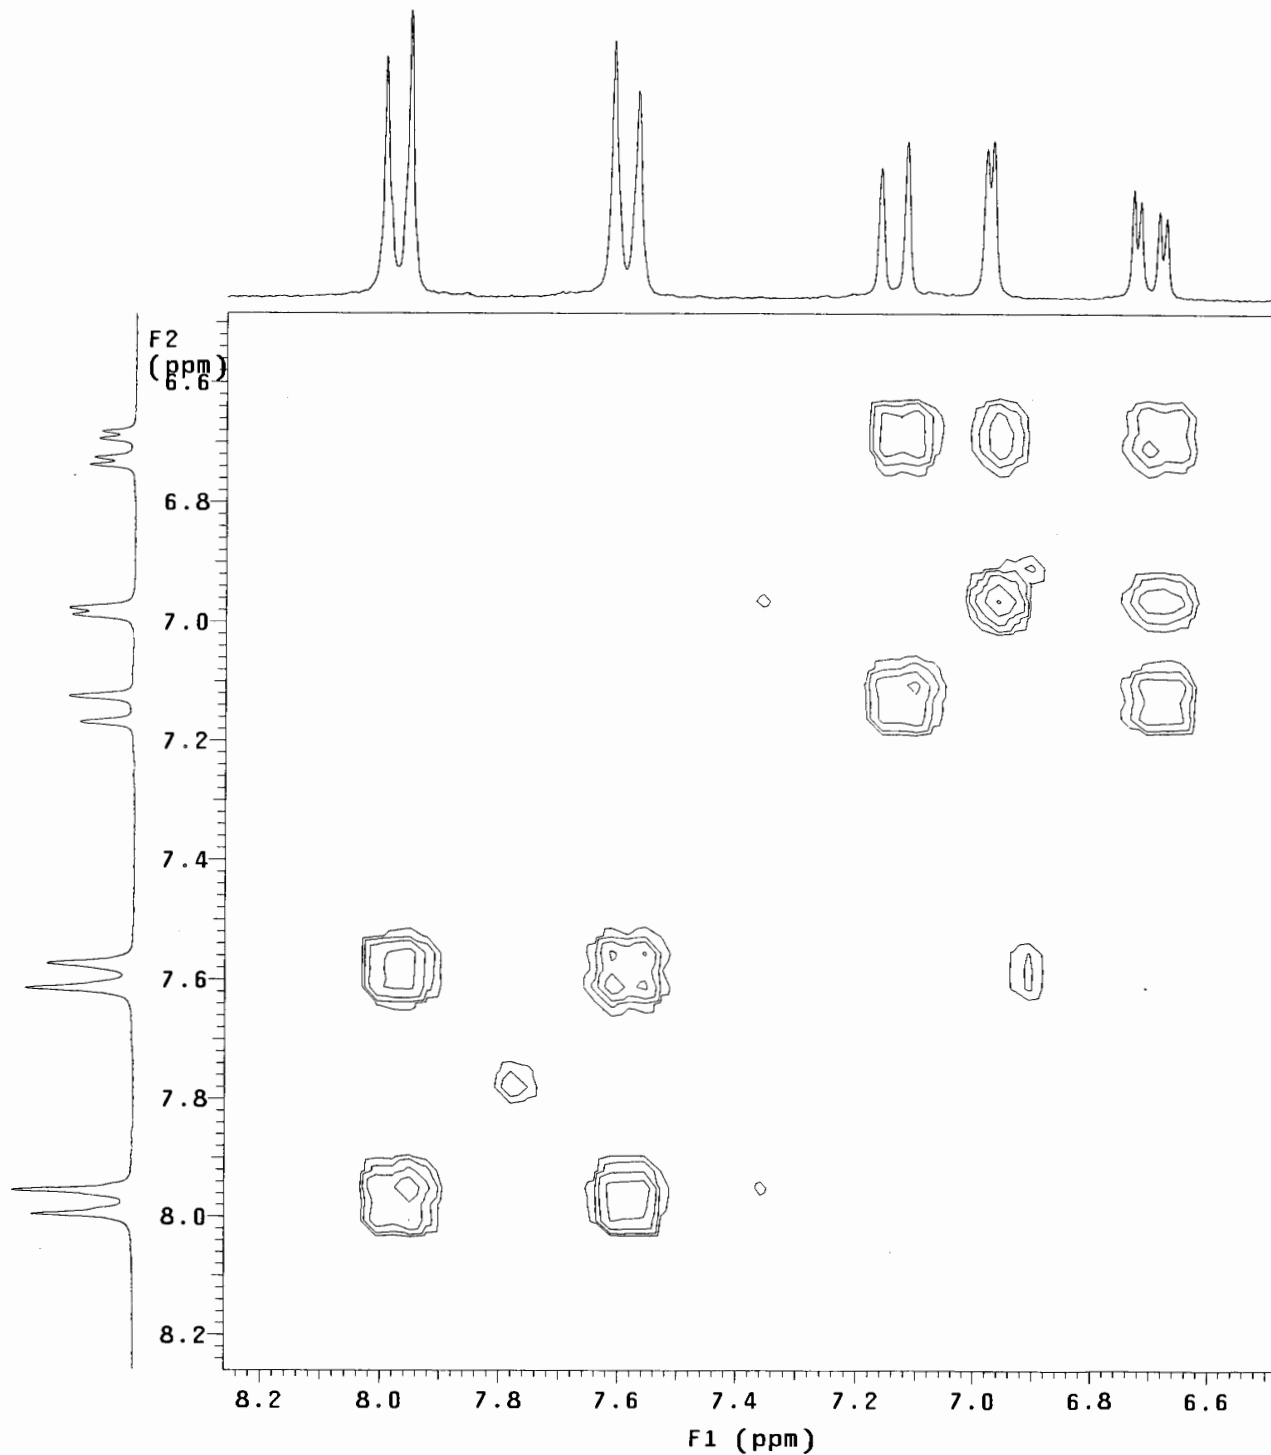

S52

STANDARD PROTON PARAMETERS

Pulse Sequence: s2pu1

Solvent: DMSO  
Ambient temperature  
File: 100921a  
INOVA-600 "inova-wkst"

Relax. delay 1.000 sec  
Pulse 31.8 degrees  
Acq. time 3.000 sec  
Width 8999.9 Hz  
16 repetitions  
OBSERVE H1, 599.8751455 MHz  
DATA PROCESSING  
Line broadening 0.4 Hz  
FT size 131072  
Total time 1 min, 4 sec

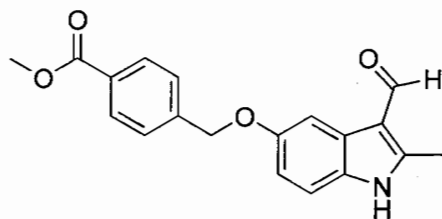

24

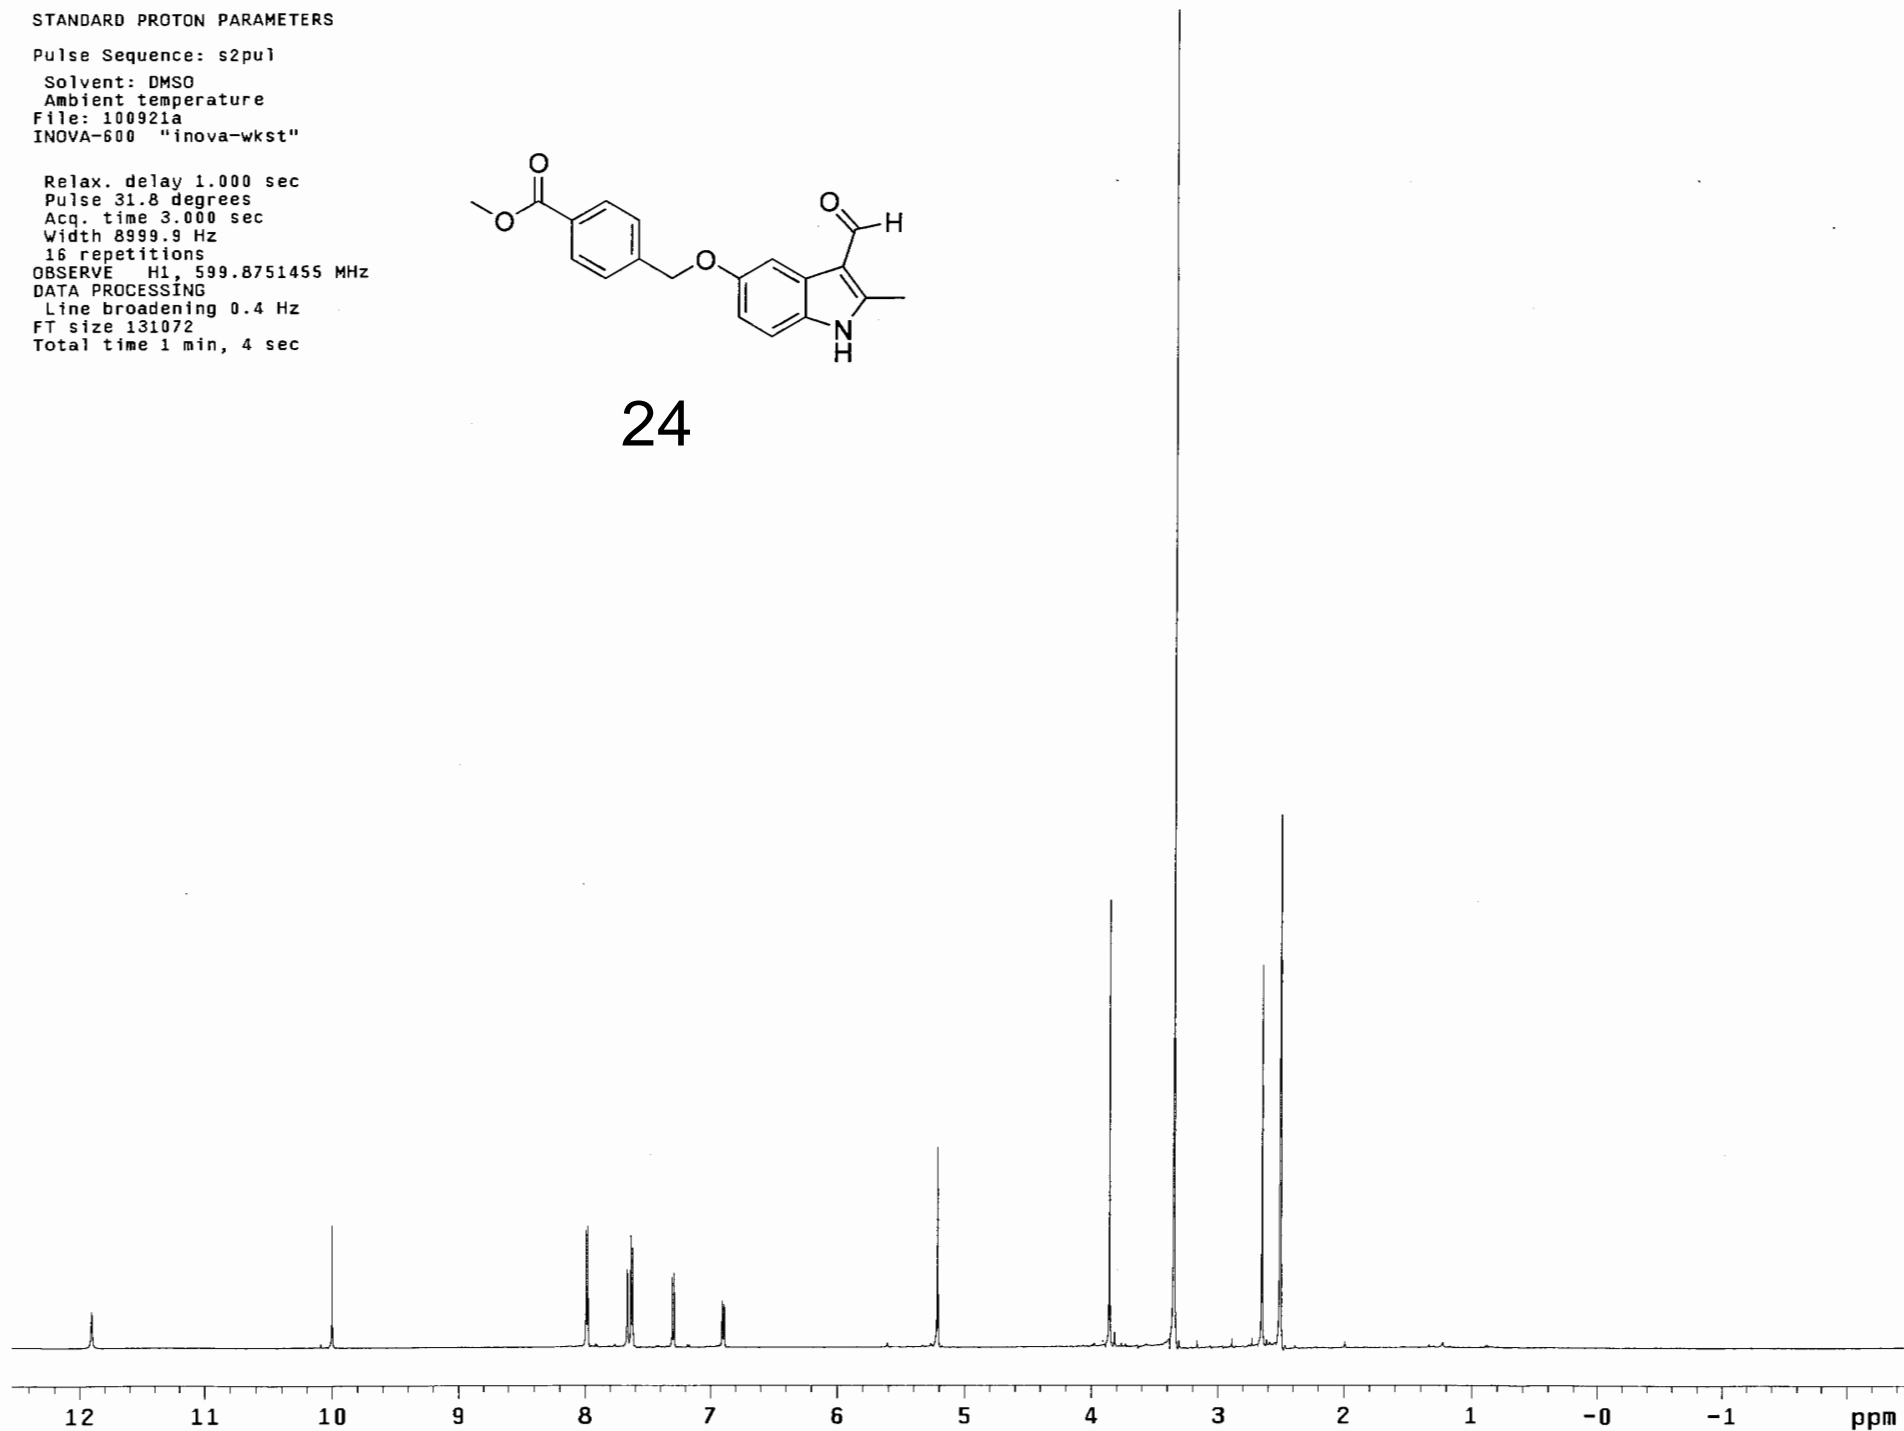

S53

STANDARD CARBON PARAMETERS

Jun 11 2011

Pulse Sequence: s2pu1

Solvent: DMSO  
Temp. 23.0 C / 296.1 K  
User: 1-14-87  
File: 2-203\_13C\_6\_11\_2-11  
INOVA-600 "inova600"

Pulse 46.4 degrees  
Acq. time 1.000 sec  
Width 37735.8 Hz  
7216 repetitions  
OBSERVE C13, 150.8387946 MHz  
DECOUPLE H1, 599.8781638 MHz  
Power 32 dB  
continuously on  
WALTZ-16 modulated  
DATA PROCESSING  
Gauss window 0.600 sec  
center at 0.100 sec  
FT size 524288  
Total time 2 hr, 48 min, 9 sec

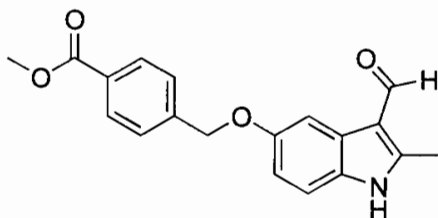

24

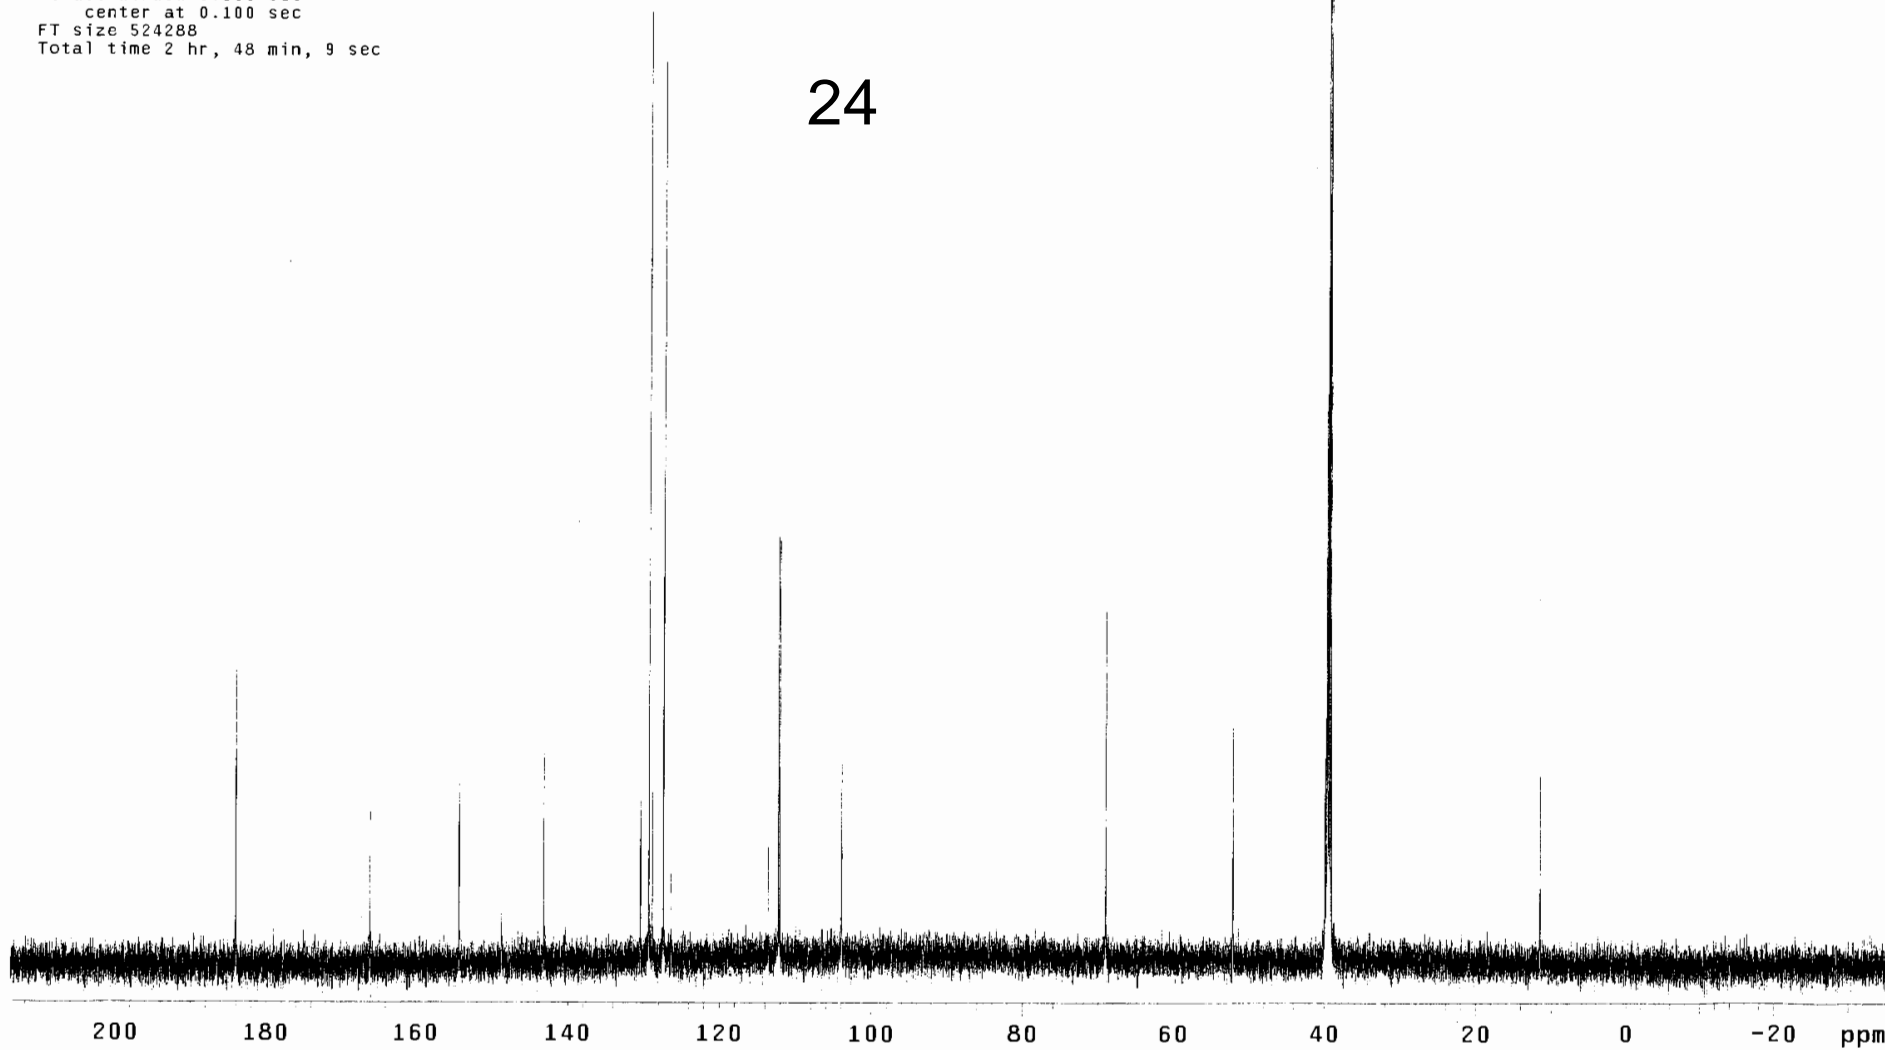

S54

STANDARD PROTON PARAMETERS

Pulse Sequence: gcosy

Solvent: DMSO  
Temp. 23.0 C / 296.1 K  
INOVA-600 "inova600"

Relax. delay 1.000 sec  
Acq. time 0.182 sec  
Width 1407.3 Hz  
2D Width 1407.3 Hz  
Single scan  
58 increments  
OBSERVE H1, 599.8751444 MHz  
DATA PROCESSING  
Sine bell 0.091 sec  
F1 DATA PROCESSING  
Sine bell 0.021 sec  
FT size 512 x 512  
Total time 1 min, 12 sec

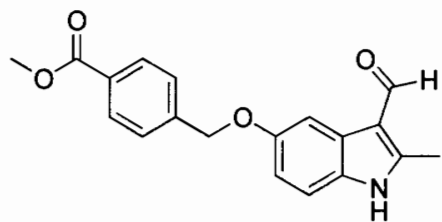

24

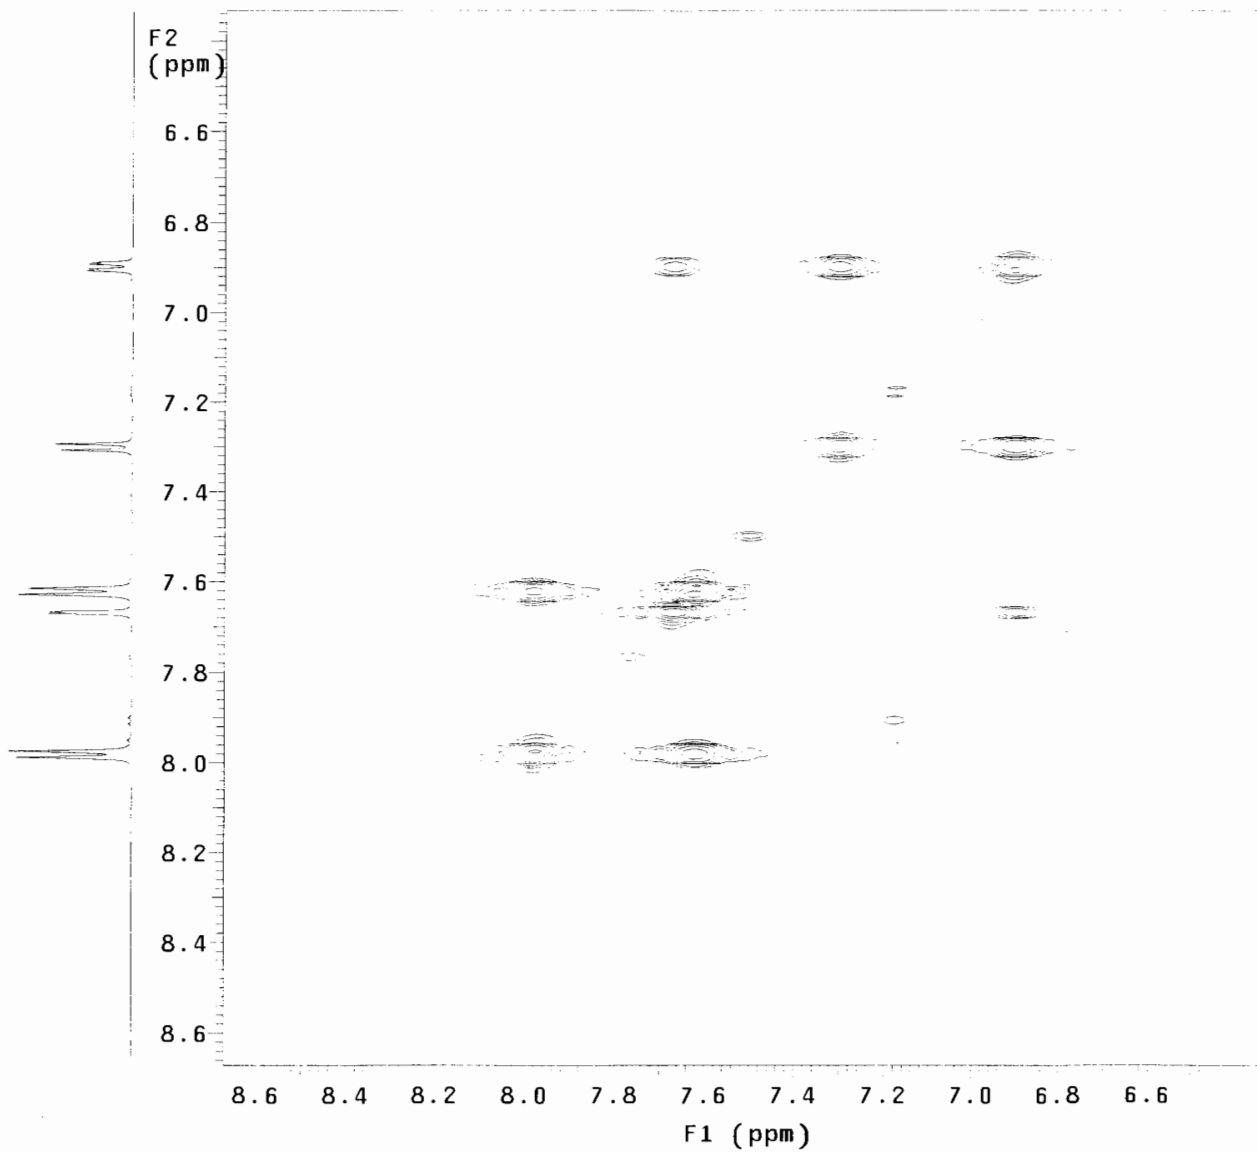

S55

STANDARD PROTON PARAMETERS

Pulse Sequence: s2pu1

Solvent: DMSO

Ambient temperature

File: 101013b

INOVA-600 "inova-wkst"

Relax. delay 1.000 sec

Pulse 31.8 degrees

Acq. time 3.000 sec

Width 8999.9 Hz

16 repetitions

OBSERVE H1, 599.8751451 MHz

DATA PROCESSING

Line broadening 0.4 Hz

FT size 131072

Total time 1 min, 4 sec

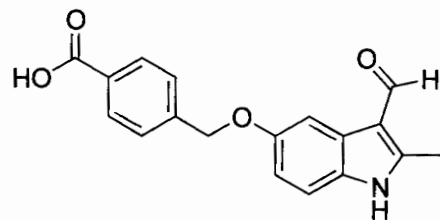

25

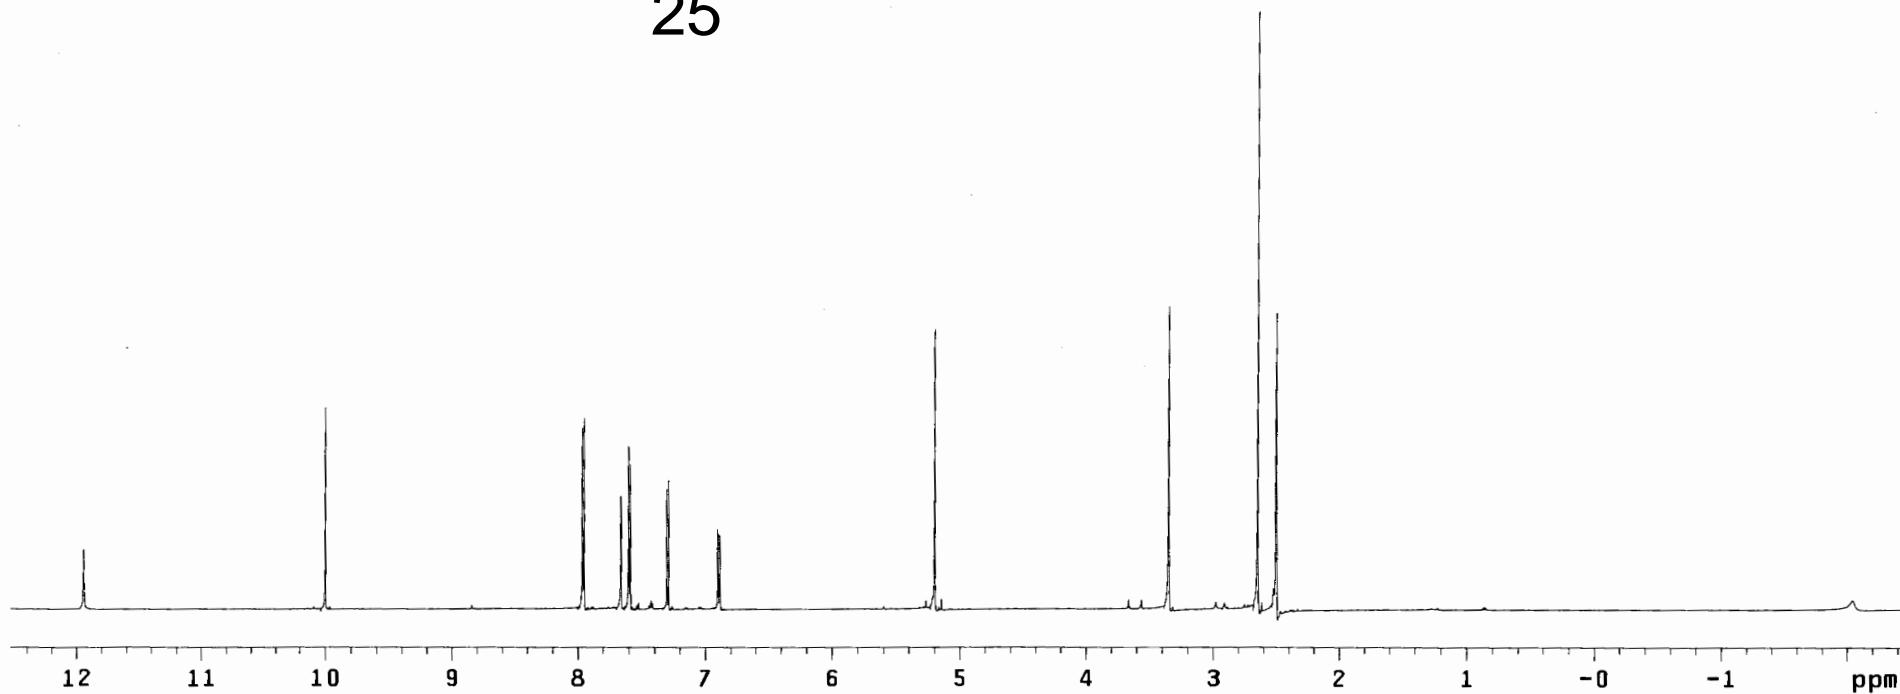

S56

STANDARD CARBON PARAMETERS

Jun 11 2011

Pulse Sequence: s2pu1

Solvent: DMSO  
Temp. 23.0 C / 296.1 K  
User: 1-14-87  
INDVA-600 "inova600"

Pulse 46.4 degrees  
Acq. time 1.000 sec  
Width 37735.8 Hz  
4944 repetitions  
DBSERVE C13, 150.8387904 MHz  
DECOUPLE H1, 599.8781638 MHz  
Power 32 dB  
continuously on  
WALTZ-16 modulated  
DATA PROCESSING  
Gauss window 0.600 sec  
center at 0.100 sec  
FT size 524288  
Total time 28 hr, 1 min, 31 sec

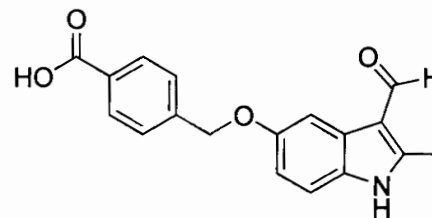

25

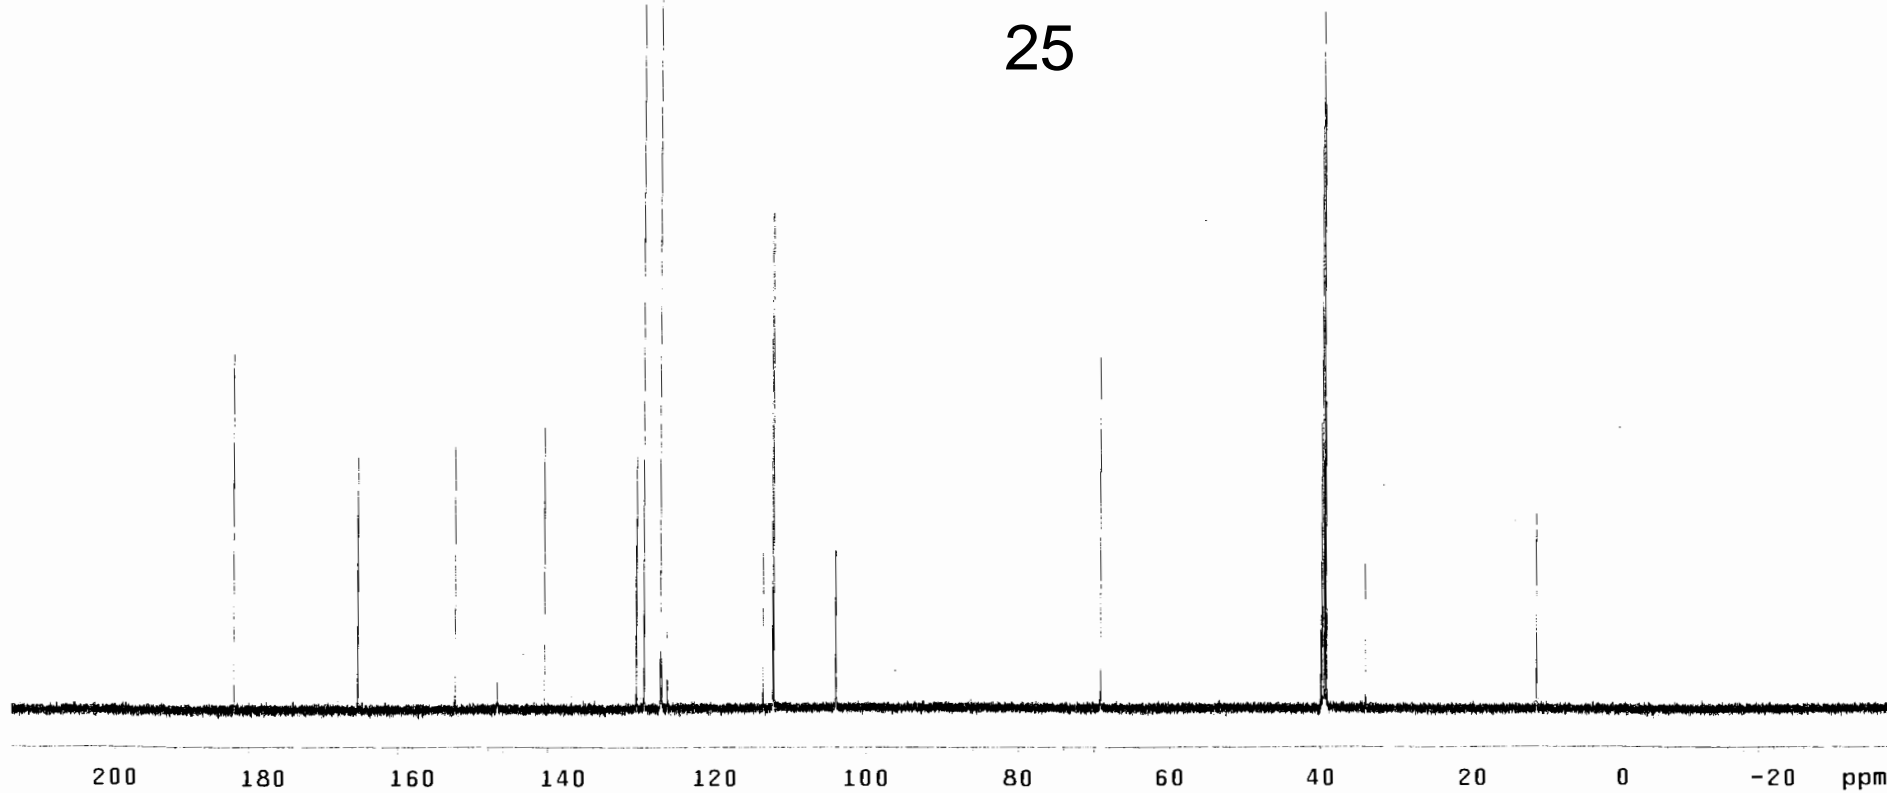



S57

STANDARD PROTON PARAMETERS

Pulse Sequence: gcosy

Solvent: DMSO  
Ambient temperature  
File: 100929b  
INOVA-600 "inova-wkst"

Relax. delay 1.000 sec  
Acq. time 0.130 sec  
Width 3950.0 Hz  
2D Width 3950.0 Hz  
Single scan  
256 increments  
OBSERVE H1, 599.8751454 MHz  
DATA PROCESSING  
Sine bell 0.065 sec  
F1 DATA PROCESSING  
Sine bell 0.032 sec  
FT size 1024 x 1024  
Total time 5 min, 3 sec

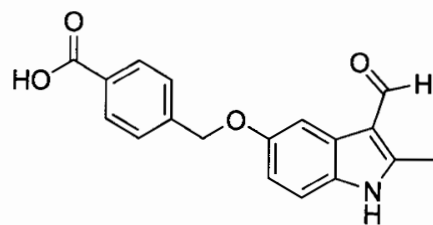

25

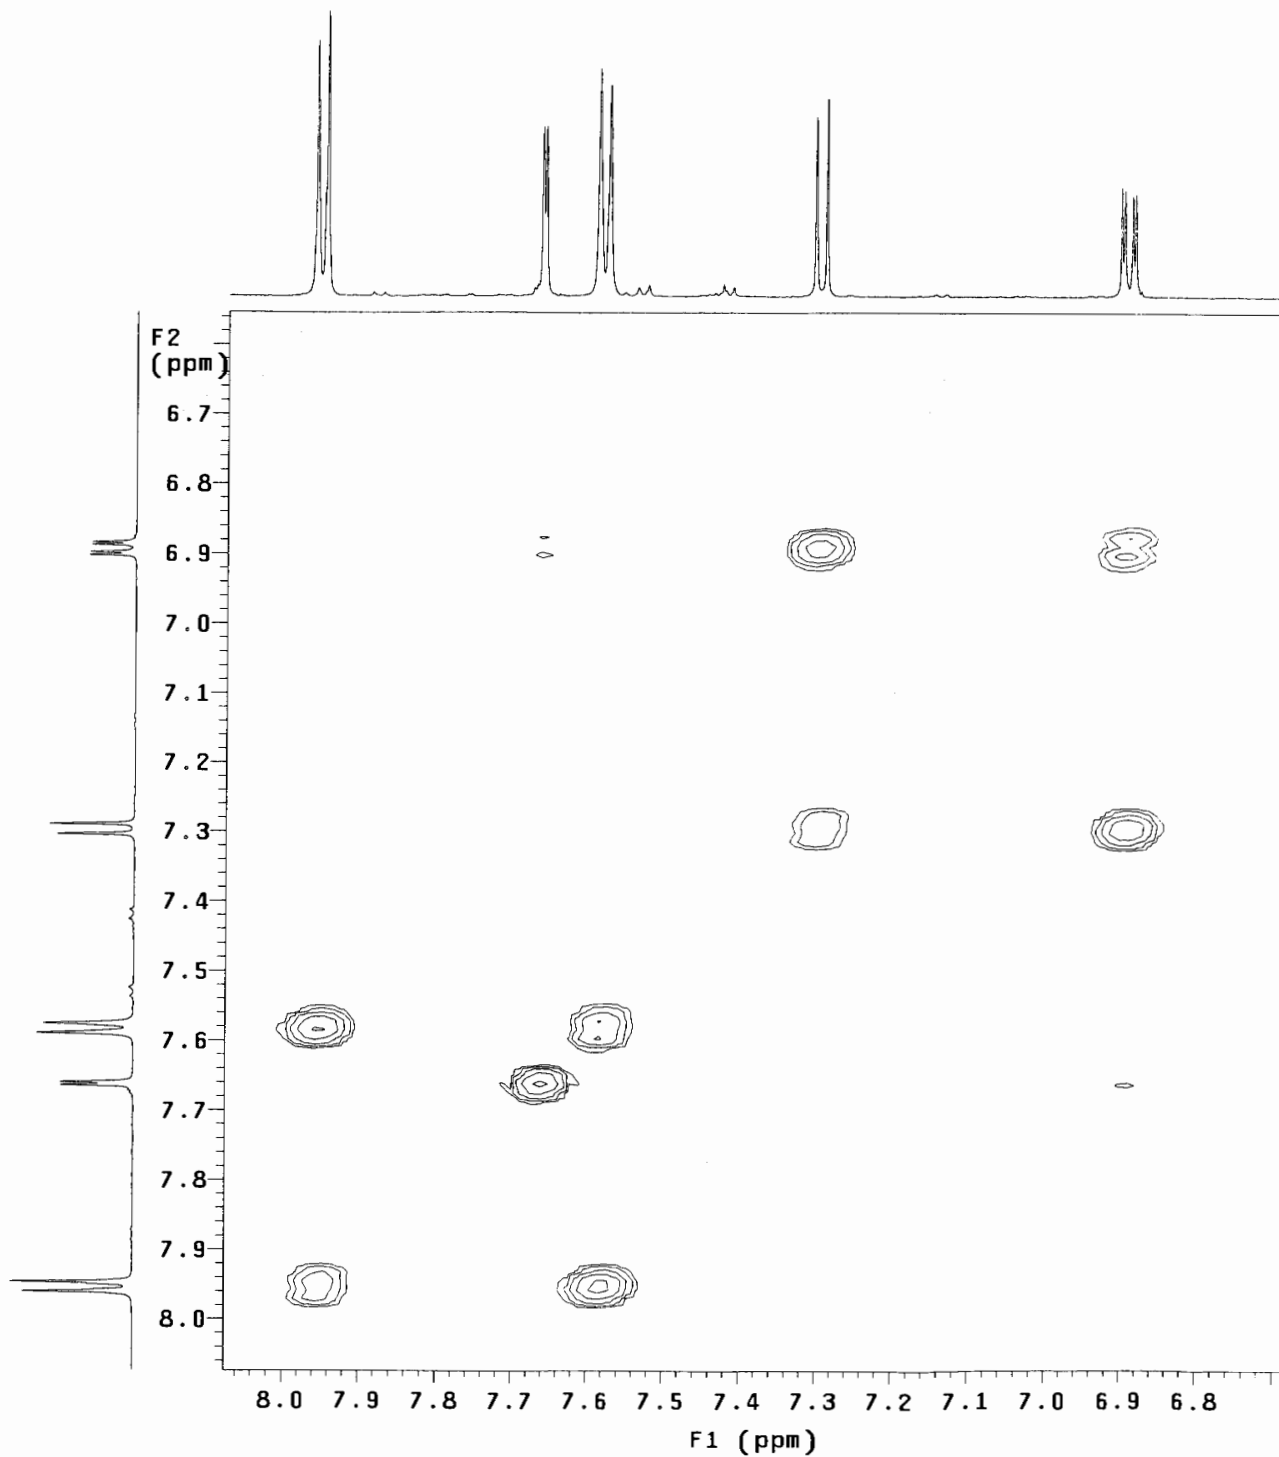

S58

STANDARD PROTON PARAMETERS

Pulse Sequence: s2pul

Solvent: DMSO  
Ambient temperature  
INOVA-600 "inova600"

Relax. delay 1.000 sec  
Pulse 31.8 degrees  
Acq. time 3.000 sec  
Width 8999.9 Hz  
16 repetitions  
OBSERVE H1, 599.8751449 MHz  
DATA PROCESSING  
Line broadening 0.4 Hz  
FT size 131072  
Total time 1 min, 4 sec

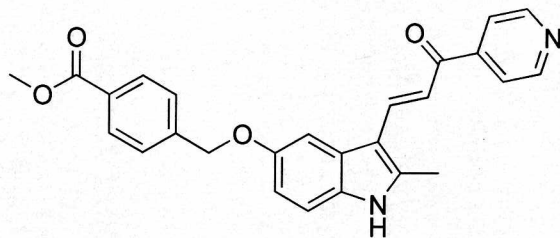

26

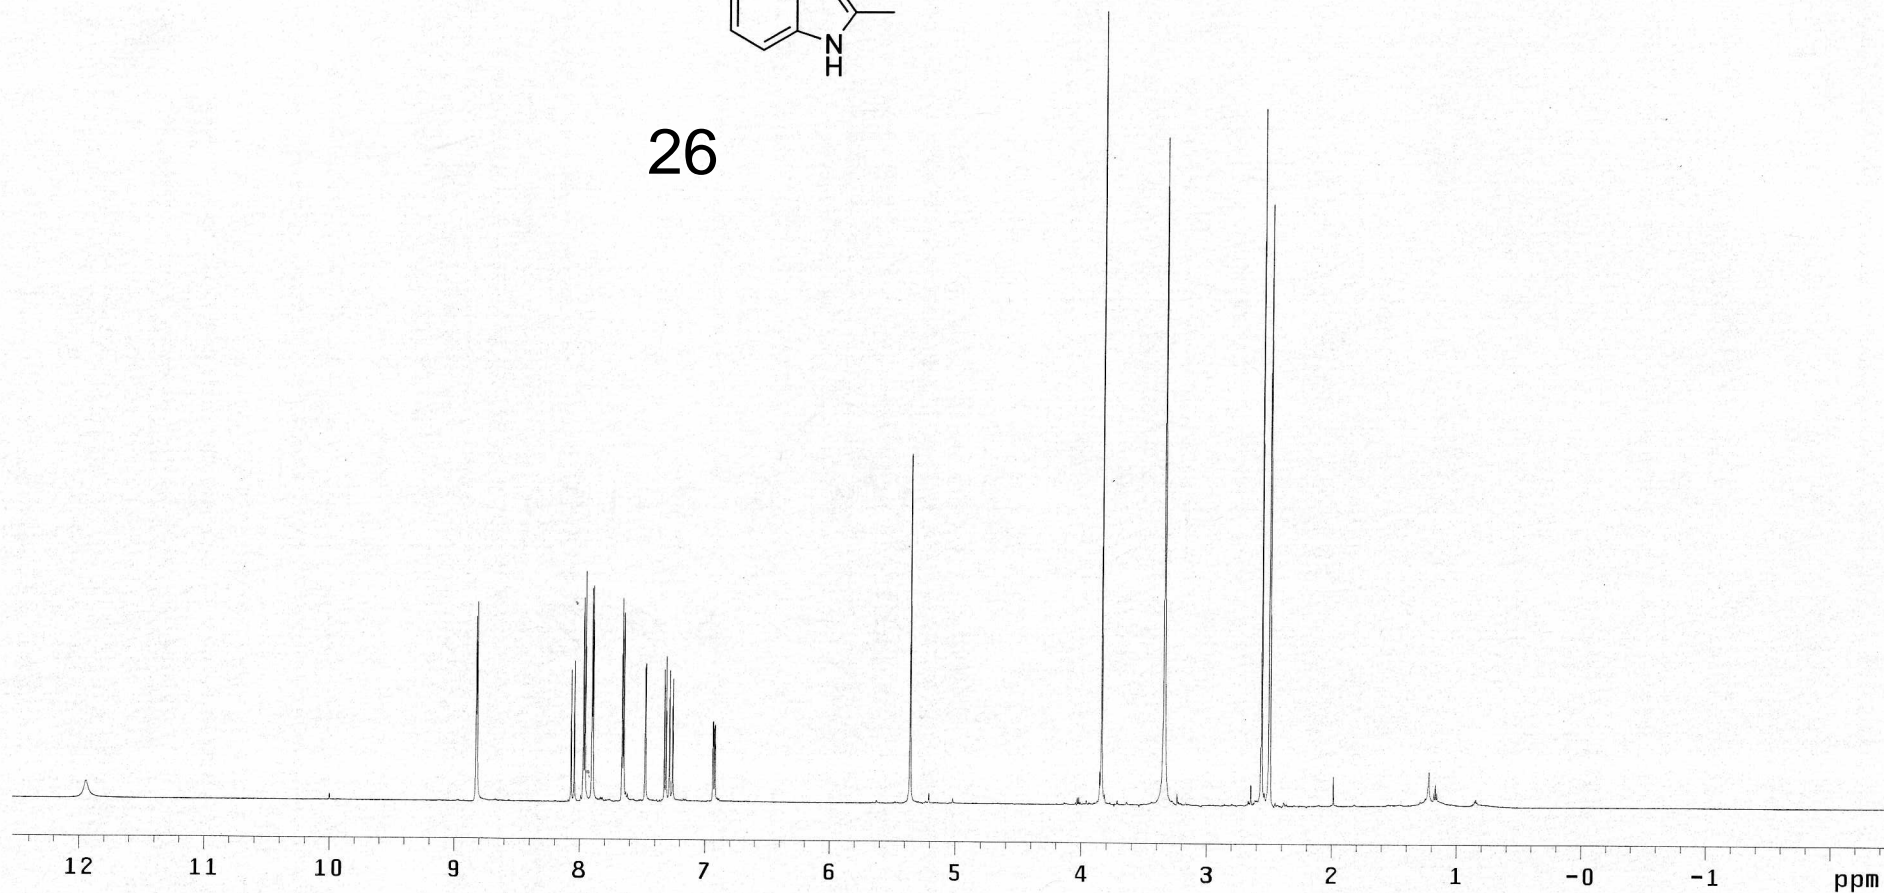

S59  
STANDARD CARBON PARAMETERS

Pulse Sequence: s2pu1

Solvent: DMSO  
Ambient temperature  
User: 1-14-87  
File: 101123j  
INOVA-600 "inova600"

Pulse 46.4 degrees  
Acq. time 1.000 sec  
Width 37735.8 Hz  
42784 repetitions  
OBSERVE C13, 150.8387924 MHz  
DECOUPLE H1, 599.8781638 MHz  
Power 32 dB  
continuously on  
WALTZ-16 modulated  
DATA PROCESSING  
Gauss window 0.600 sec  
center at 0.100 sec  
FT size 524288  
Total time 28 hr, 1 min, 31 sec

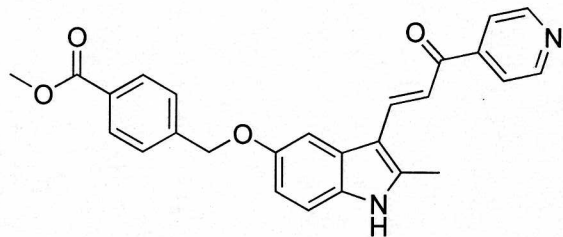

26

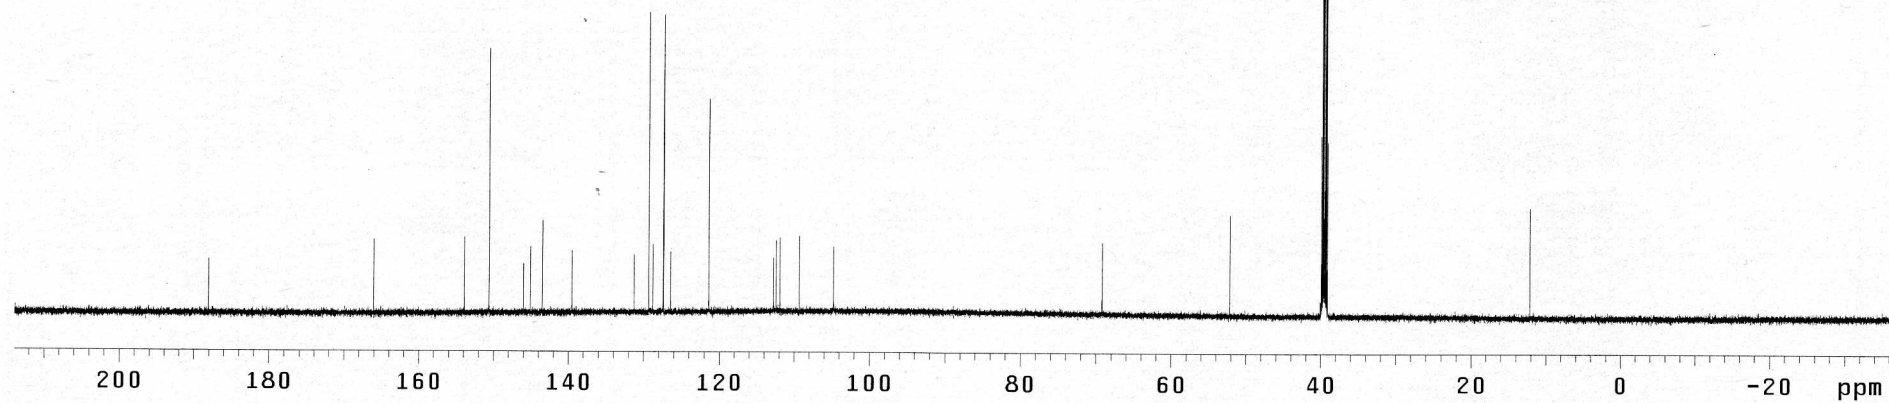

S60

STANDARD PROTON PARAMETERS

Pulse Sequence: gcosy

Solvent: DMSO

Ambient temperature

File: 101123i

INOVA-600 "inova600"

Relax. delay 1.000 sec

Acq. time 0.235 sec

Width 2176.0 Hz

2D Width 2176.0 Hz

Single scan

90 increments

OBSERVE H1, 599.8751449 MHz

DATA PROCESSING

Sine bell 0.118 sec

F1 DATA PROCESSING

Sine bell 0.021 sec

FT size 1024 x 1024

Total time 1 min, 56 sec

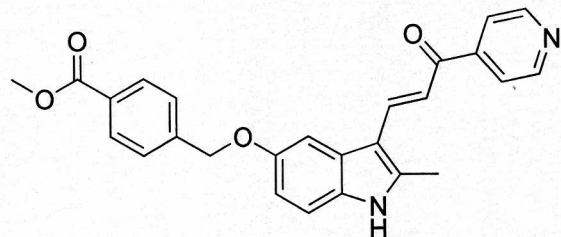

26

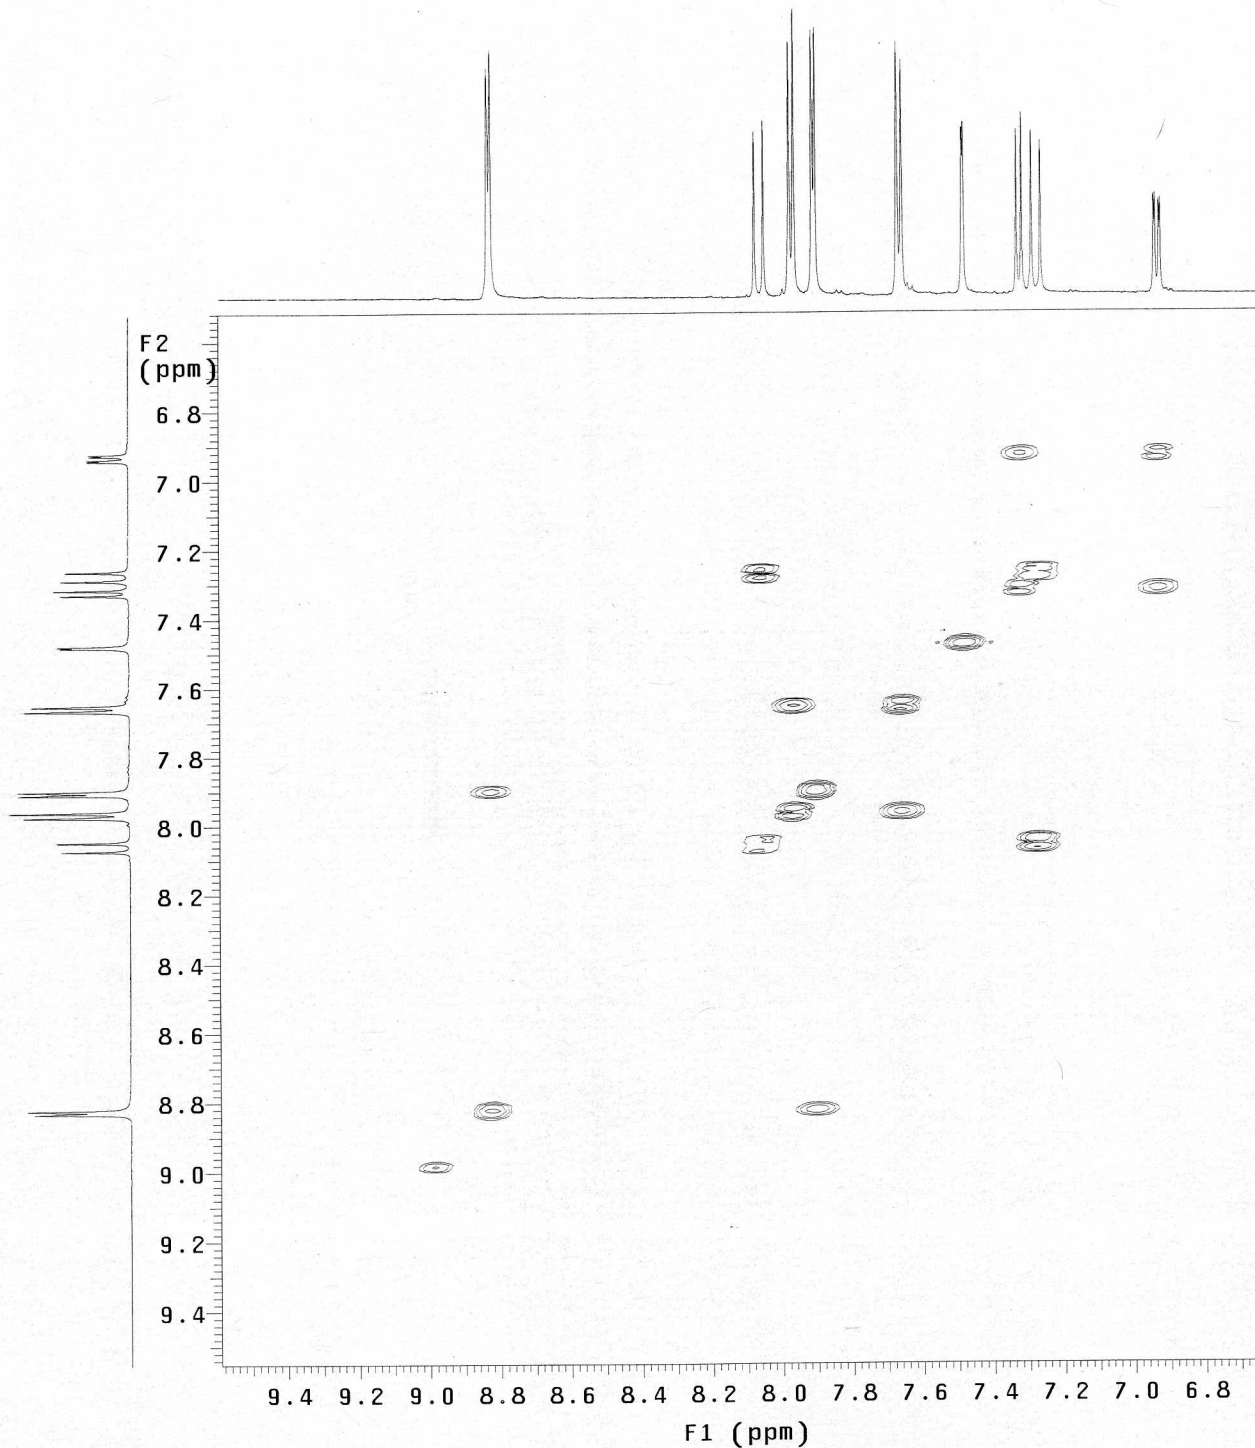

S61  
STANDARD PROTON PARAMETERS

Pulse Sequence: s2pu1

Solvent: DMSO  
Ambient temperature  
INOVA-600 "inova600"

Relax. delay 1.000 sec  
Pulse 31.8 degrees  
Acq. time 3.000 sec  
Width 8999.9 Hz  
16 repetitions  
OBSERVE H1, 599.8751447 MHz  
DATA PROCESSING  
Line broadening 0.4 Hz  
FT size 131072  
Total time 1 min, 4 sec

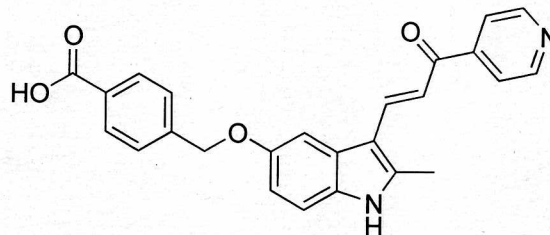

27

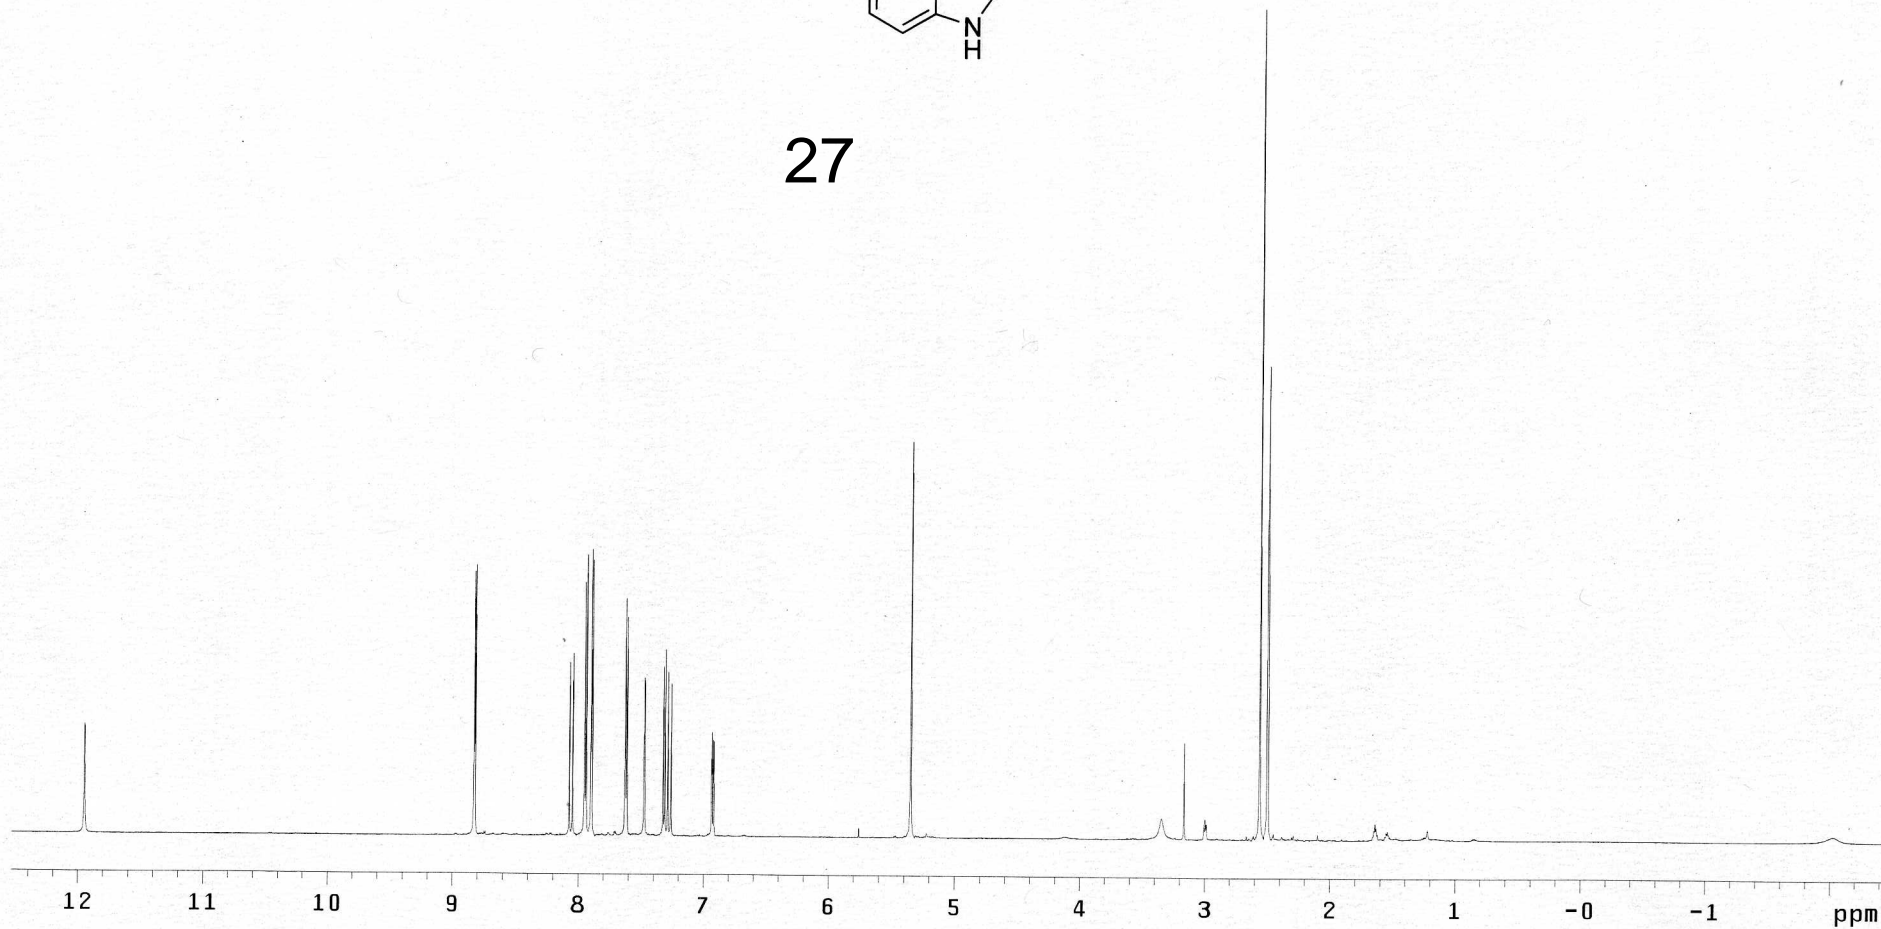

S62

STANDARD CARBON PARAMETERS

Pulse Sequence: s2pul

Solvent: DMSO  
Ambient temperature  
User: 1-14-87  
File: 101129b  
INOVA-600 "inova600"

Pulse 93.8 degrees  
Acq. time 1.000 sec  
Width 37735.8 Hz  
41328 repetitions  
OBSERVE C13, 150.8387926 MHz  
DECOUPLE H1, 599.8781638 MHz  
Power 43 dB  
continuously on  
WALTZ-16 modulated  
DATA PROCESSING  
Gauss window 0.600 sec  
center at 0.100 sec  
FT size 524288  
Total time 11 hr, 46 min, 14 sec

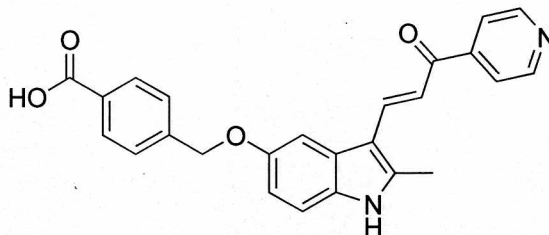

27

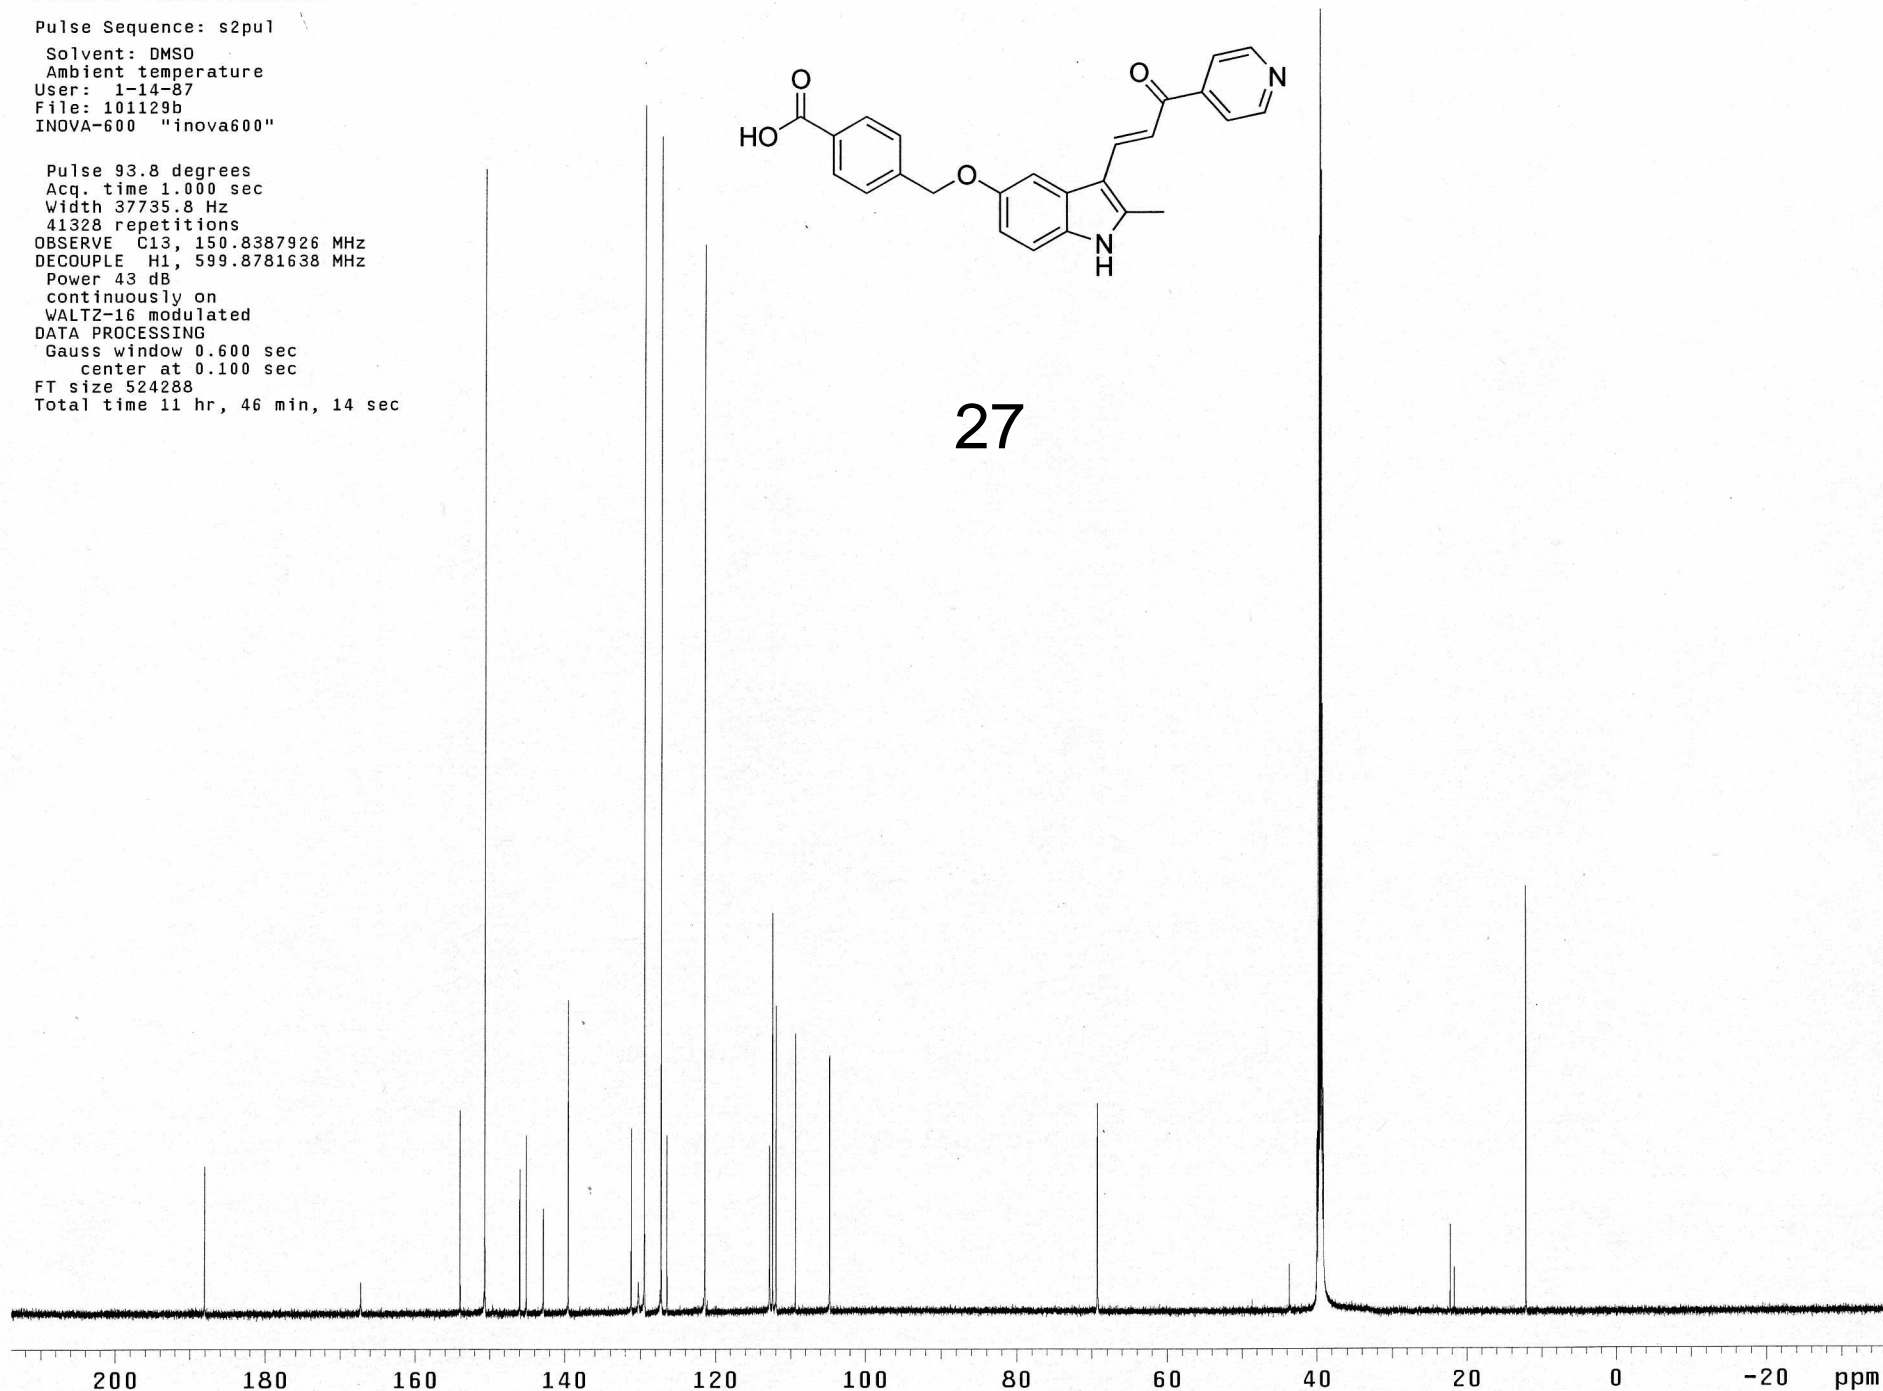

S63

STANDARD PROTON PARAMETERS

Pulse Sequence: gcosy

Solvent: DMSO  
Ambient temperature  
File: 101123g  
INOVA-600 "inova600"

Relax. delay 1.000 sec  
Acq. time 0.140 sec  
Width 1833.1 Hz  
2D Width 1833.1 Hz  
Single scan  
76 increments

OBSERVE H1, 599.8751447 MHz  
DATA PROCESSING  
Sine bell 0.070 sec  
F1 DATA PROCESSING  
Sine bell 0.021 sec  
FT size 512 x 512  
Total time 1 min, 31 sec

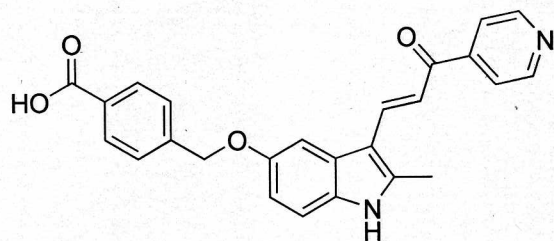

27

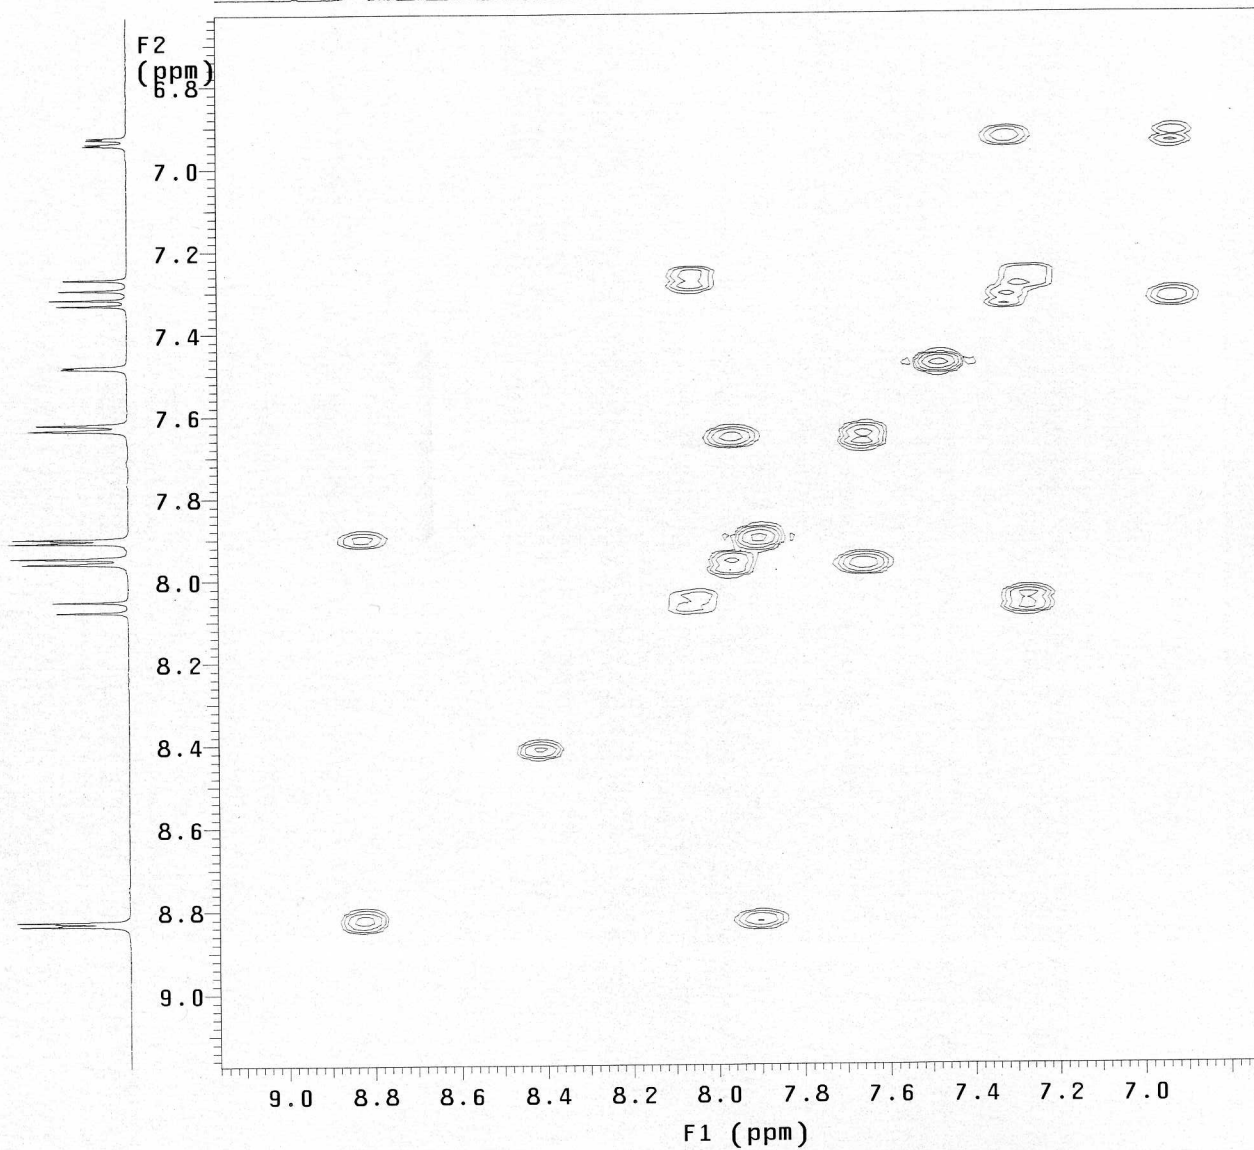

S64

STANDARD PROTON PARAMETERS

Pulse Sequence: s2pu1

Solvent: DMSO  
Ambient temperature  
File: 2-25B  
INDVA-600 "inova-wkst"

Relax. delay 1.000 sec  
Pulse 31.8 degrees  
Acq. time 3.000 sec  
Width 8999.9 Hz  
16 repetitions  
OBSERVE H1, 599.8751443 MHz  
DATA PROCESSING  
Line broadening 0.4 Hz  
FT size 131072  
Total time 1 min, 4 sec

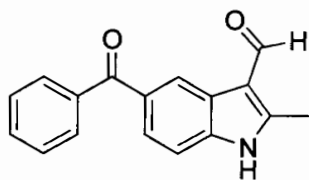

28

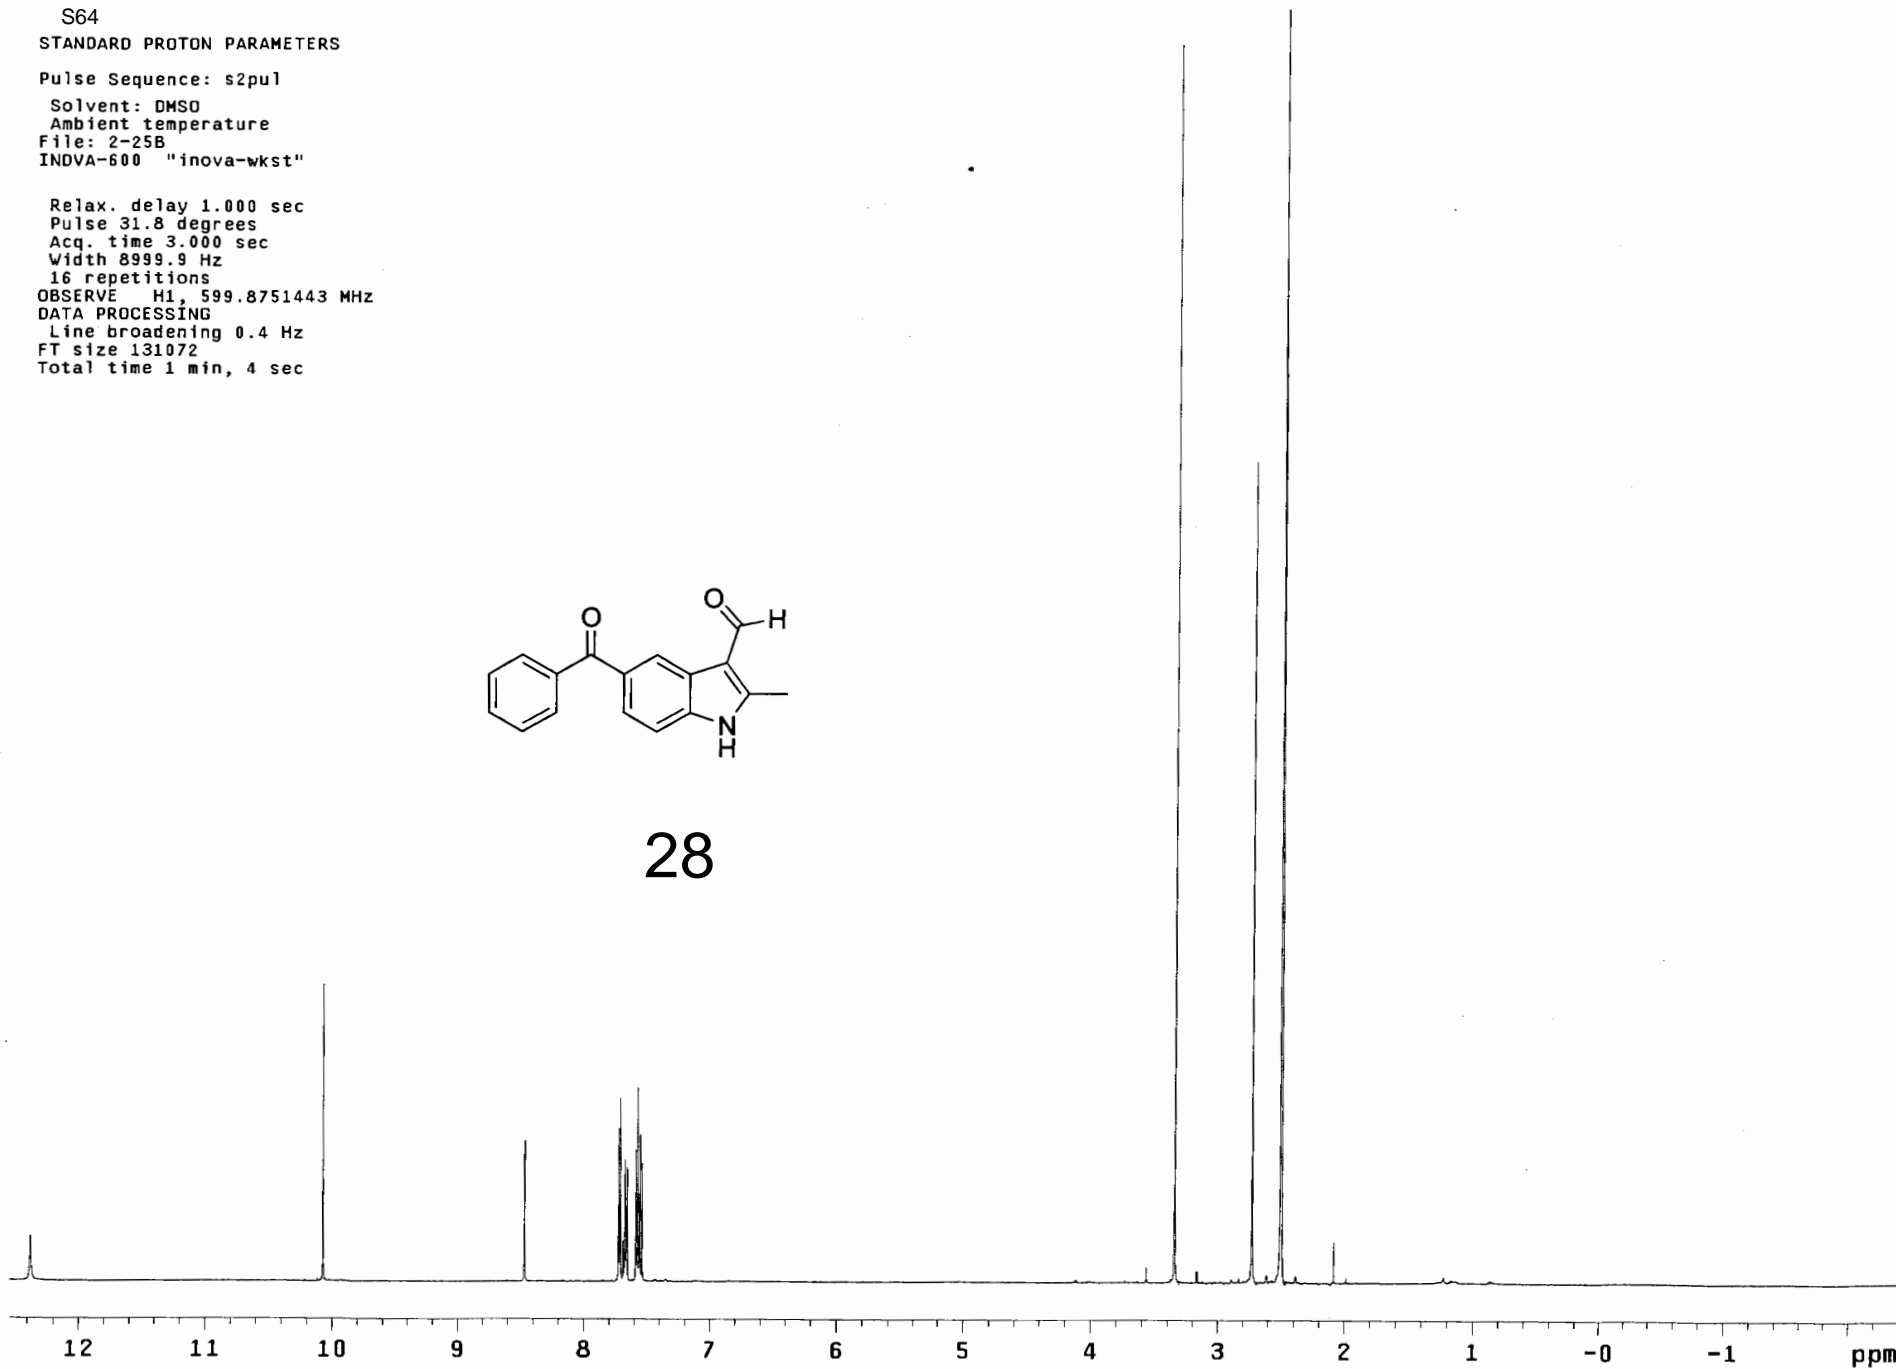



S65

STANDARD CARBON PARAMETERS

Pulse Sequence: s2pul

Solvent: DMSO

Ambient temperature

User: 1-14-87

File: 2-21b\_c13\_6\_6\_2011

INOVA-600 "inova-wkst"

Pulse 46.4 degrees

Acq. time 1.000 sec

Width 37735.8 Hz

10000 repetitions

OBSERVE C13, 150.8387860 MHz

DECOUPLE H1, 599.8781638 MHz

Power 32 dB

continuously on

WALTZ-16 modulated

DATA PROCESSING

Gauss window 0.600 sec

center at 0.100 sec

FT size 524288

Total time 2 hr, 48 min, 9 sec

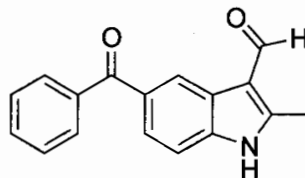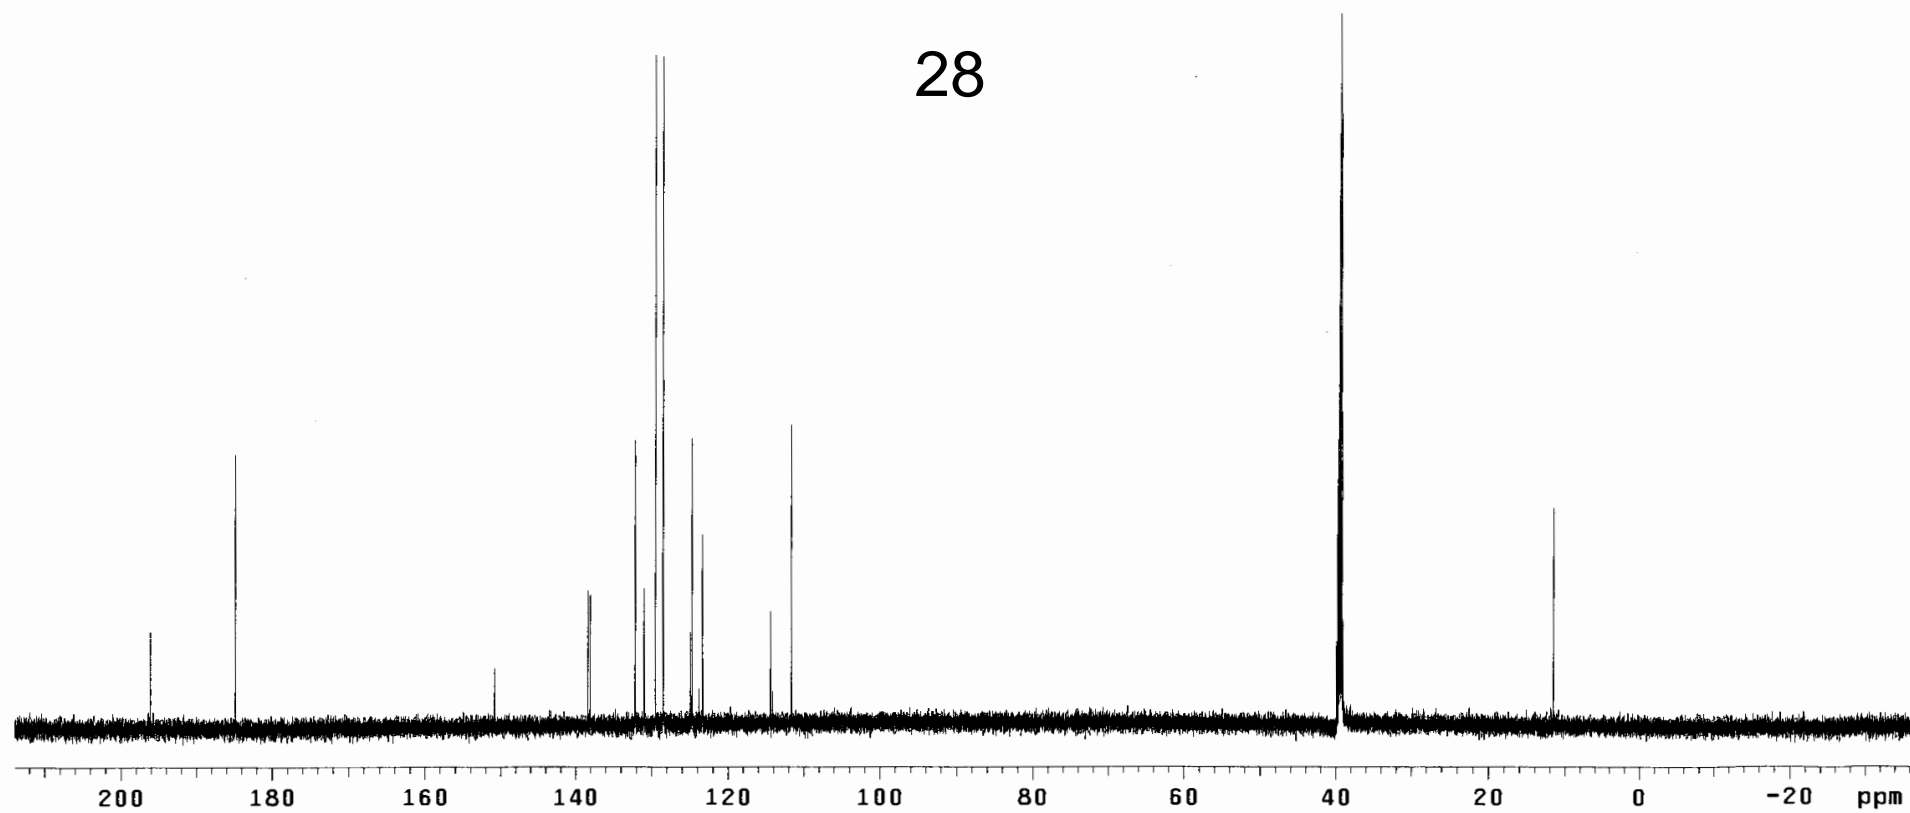

S66

STANDARD PROTON PARAMETERS

Pulse Sequence: gcosy  
Solvent: DMSO  
Ambient temperature  
File: 2-258cosy  
INOVA-600 "inova-wkst"

Relax. delay 1.000 sec  
Acq. time 0.212 sec  
Width 1206.3 Hz  
2D Width 1206.3 Hz  
Single scan  
50 increments  
OBSERVE H1, 599.8751443 MHz  
DATA PROCESSING  
Sine bell 0.106 sec  
F1 DATA PROCESSING  
Sine bell 0.021 sec  
FT size 512 x 512  
Total time 1 min, 4 sec

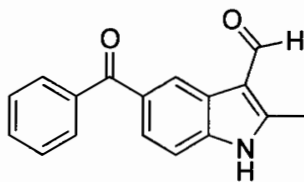

28

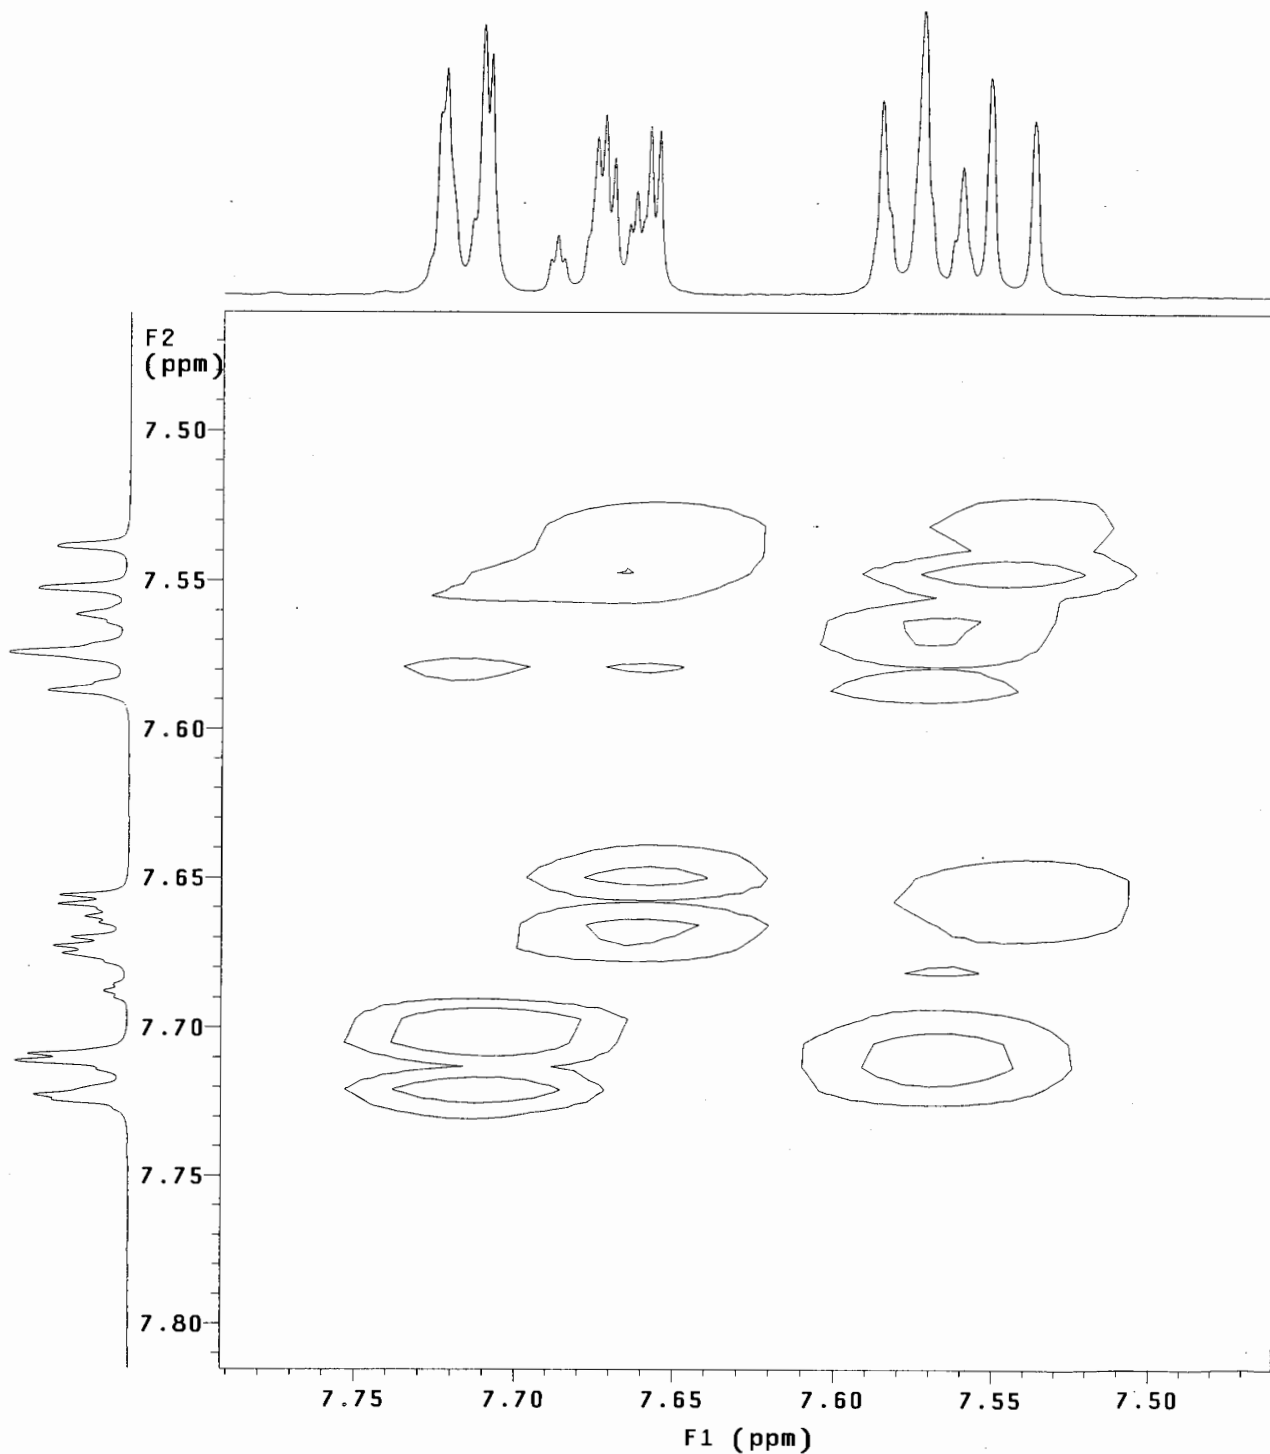

S67

STANDARD PROTON PARAMETERS

Pulse Sequence: cyclenoe

Solvent: DMSO

Ambient temperature

File: 2-25bNOEnitrogen

INOVA-600 "inova-wkst"

Relax. delay 1.000 sec

Pulse 90.0 degrees

Mixing 0.000 sec

Acq. time 3.000 sec

Width 8999.9 Hz

96 repetitions

OBSERVE H1, 599.8751463 MHz

DATA PROCESSING

Line broadening 0.4 Hz

FT size 131072

Total time 17 min, 6 sec

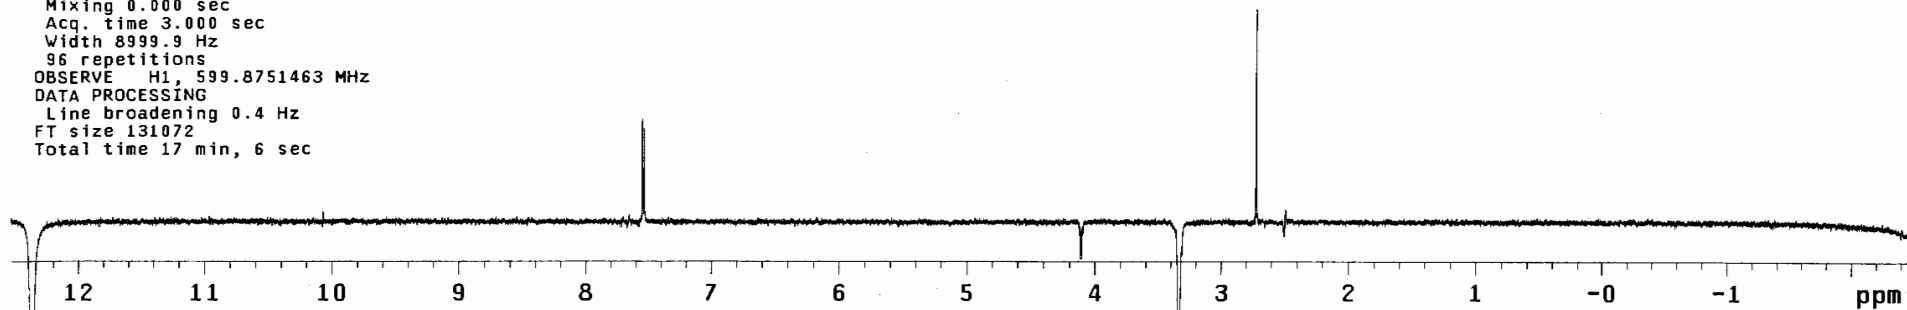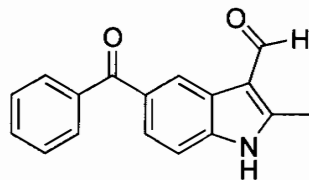

28

S68

STANDARD PROTON PARAMETERS

Pulse Sequence: cyclenoe

Solvent: DMSO  
Ambient temperature  
File: 2-25bNOEch  
INOVA-600 "inova-wkst"

Relax. delay 1.000 sec  
Pulse 90.0 degrees  
Mixing 0.000 sec  
Acq. time 3.000 sec  
Width 8999.9 Hz  
128 repetitions  
OBSERVE H1, 599.8751464 MHz  
DATA PROCESSING  
Line broadening 0.4 Hz  
FT size 131072  
Total time 17 min, 6 sec

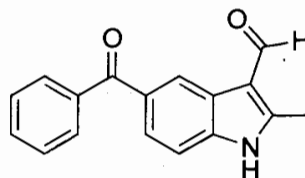

28

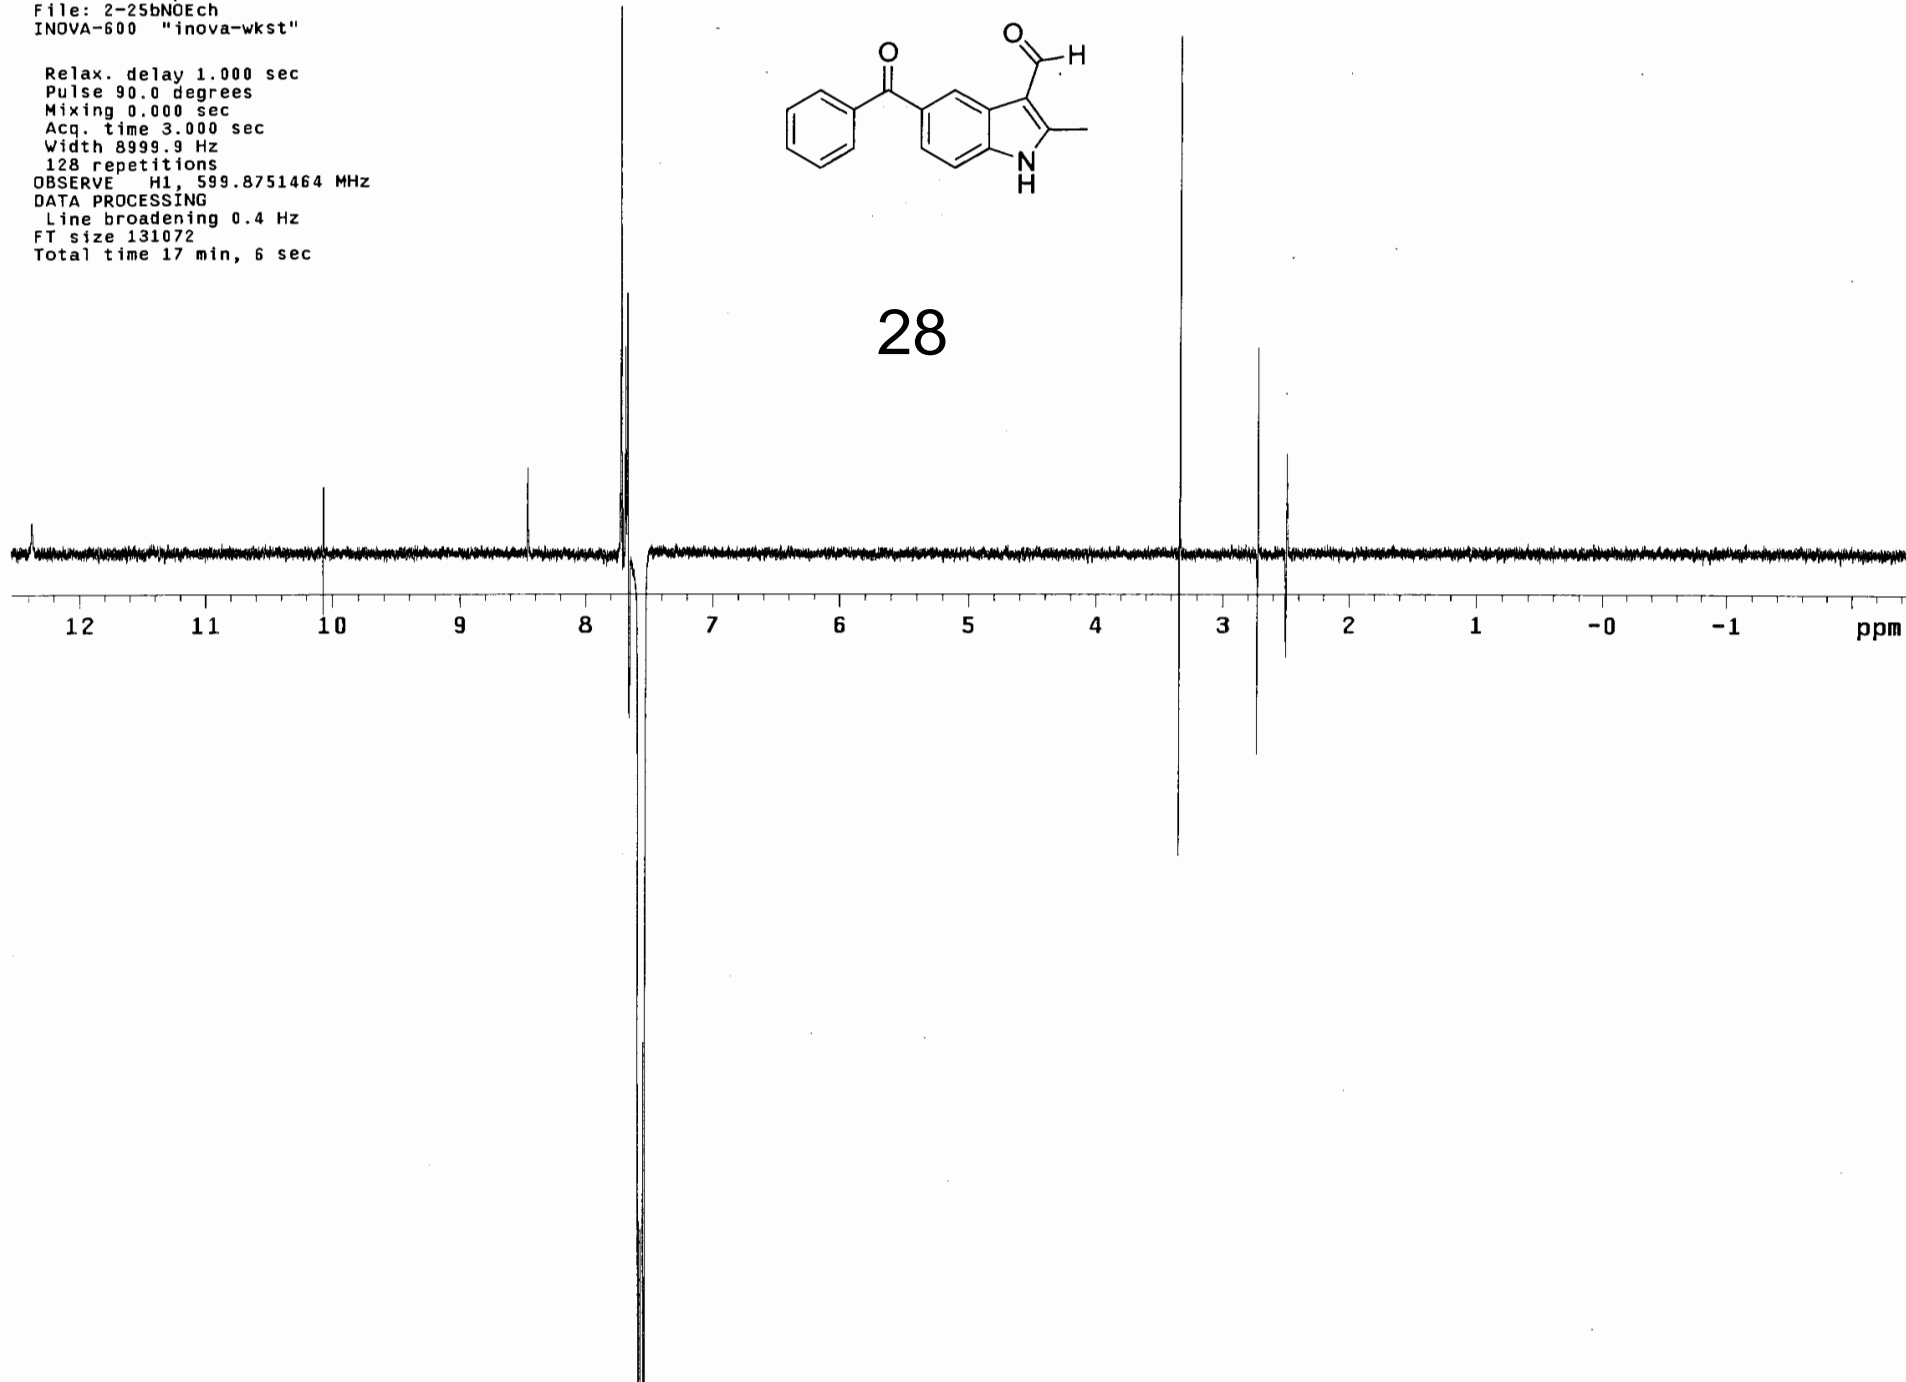

S69

STANDARD PROTON PARAMETERS

Pulse Sequence: s2pu1

Solvent: DMSO  
Temp. 20.0 C / 293.1 K  
File: 2-25A  
INOVA-600 "inova-wkst"

Relax. delay 1.000 sec  
Pulse 31.8 degrees  
Acq. time 3.000 sec  
Width 8999.9 Hz  
16 repetitions  
OBSERVE H1, 599.8751444 MHz  
DATA PROCESSING  
Line broadening 0.4 Hz  
FT size 131072  
Total time 1 min, 4 sec

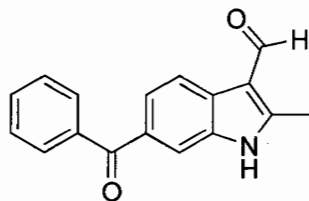

29

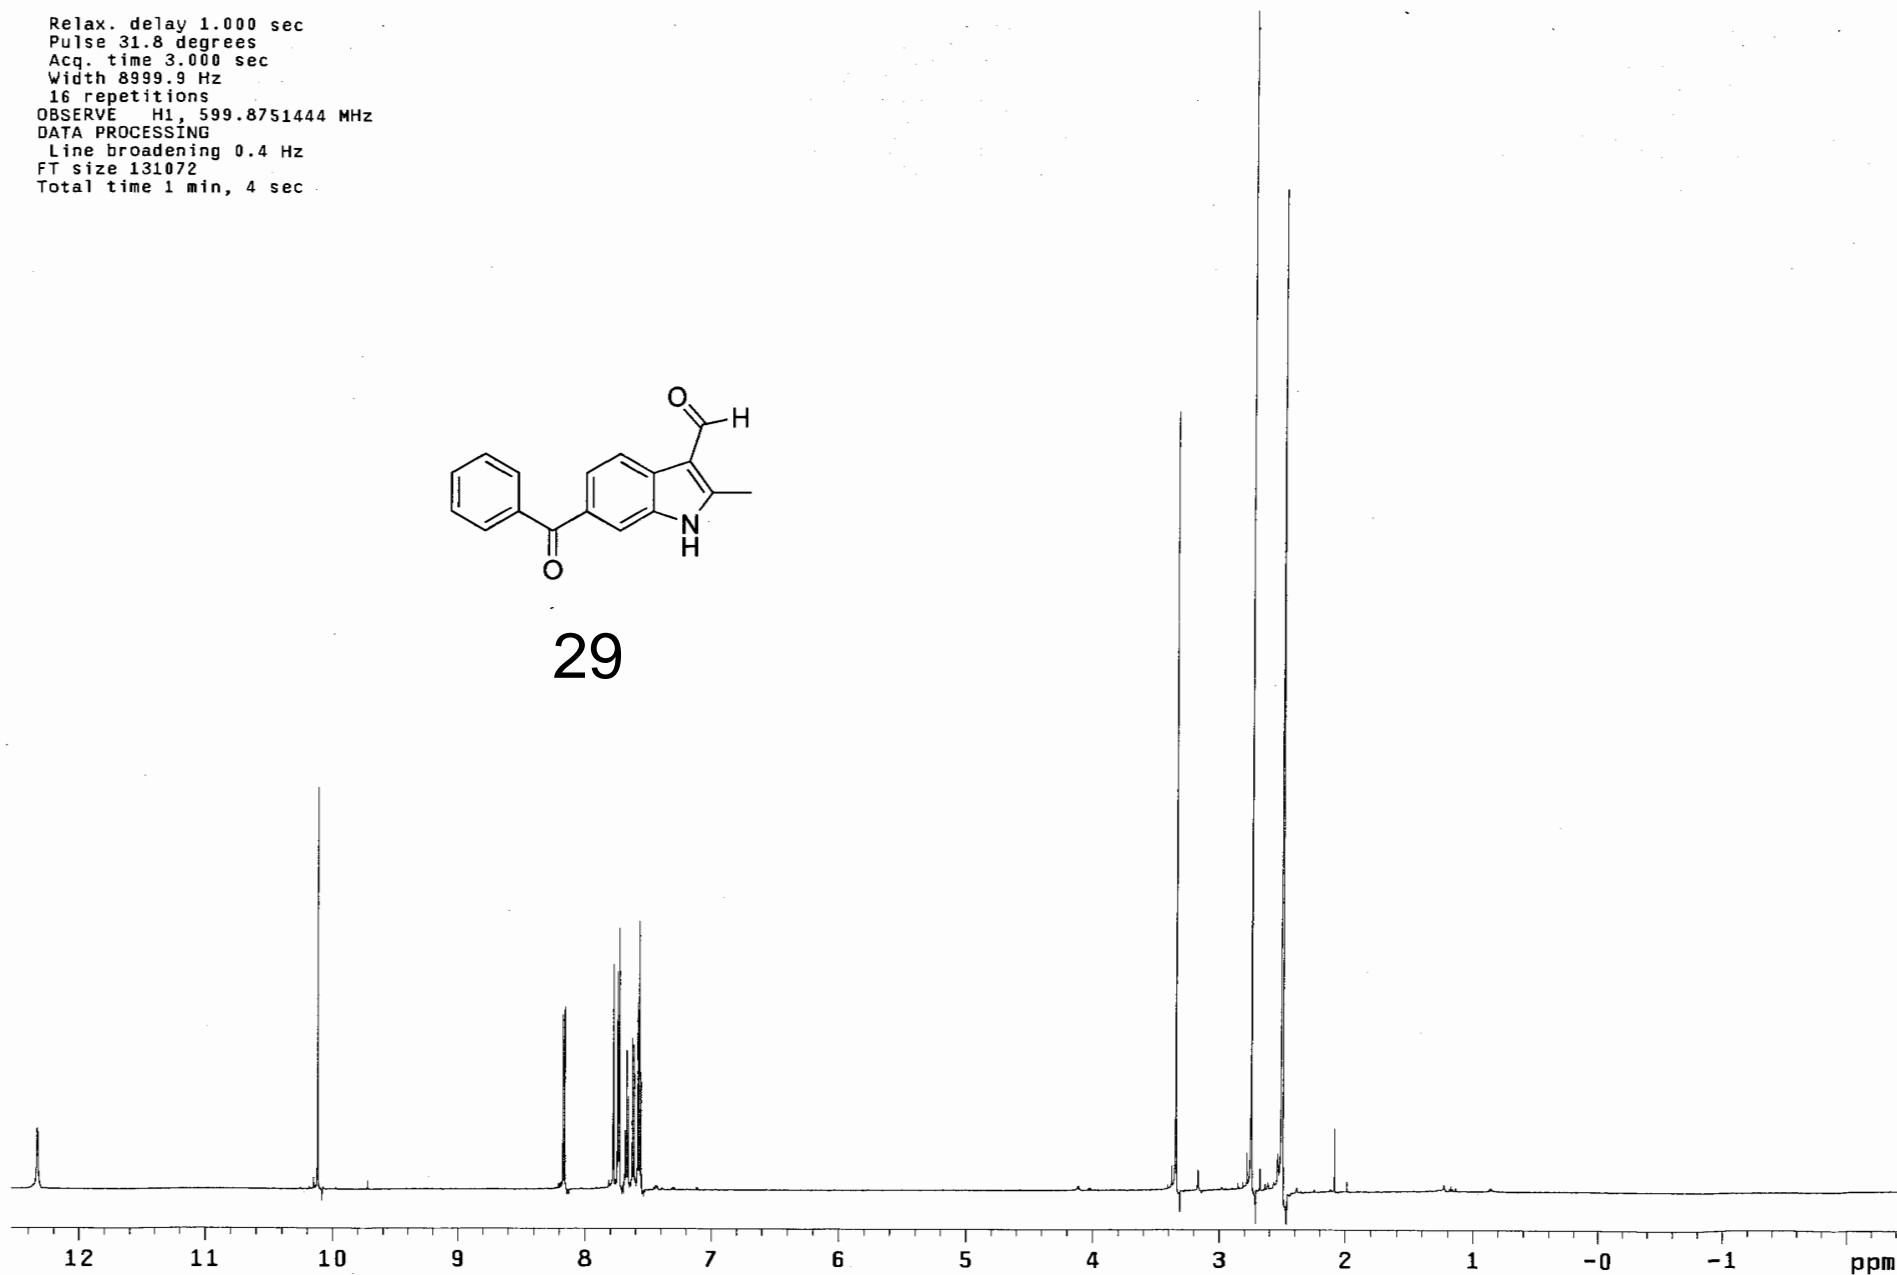

S70

STANDARD CARBON PARAMETERS

Pulse Sequence: s2pul

Solvent: DMSO

Ambient temperature

User: 1-14-87

File: 2-21a\_C13\_6\_6\_2011

INOVA-600 "inova-wkst"

Pulse 46.4 degrees

Acq. time 1.000 sec

Width 37735.8 Hz

10000 repetitions

OBSERVE C13, 150.8386940 MHz

DECOUPLE H1, 599.8781638 MHz

Power 32 dB

continuously on

WALTZ-16 modulated

DATA PROCESSING

Gauss window 0.600 sec

center at 0.100 sec

FT size 524288

Total time 2 hr, 48 min, 9 sec

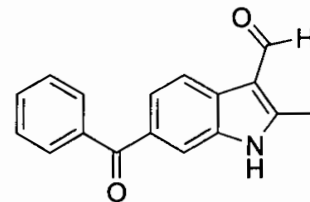

29

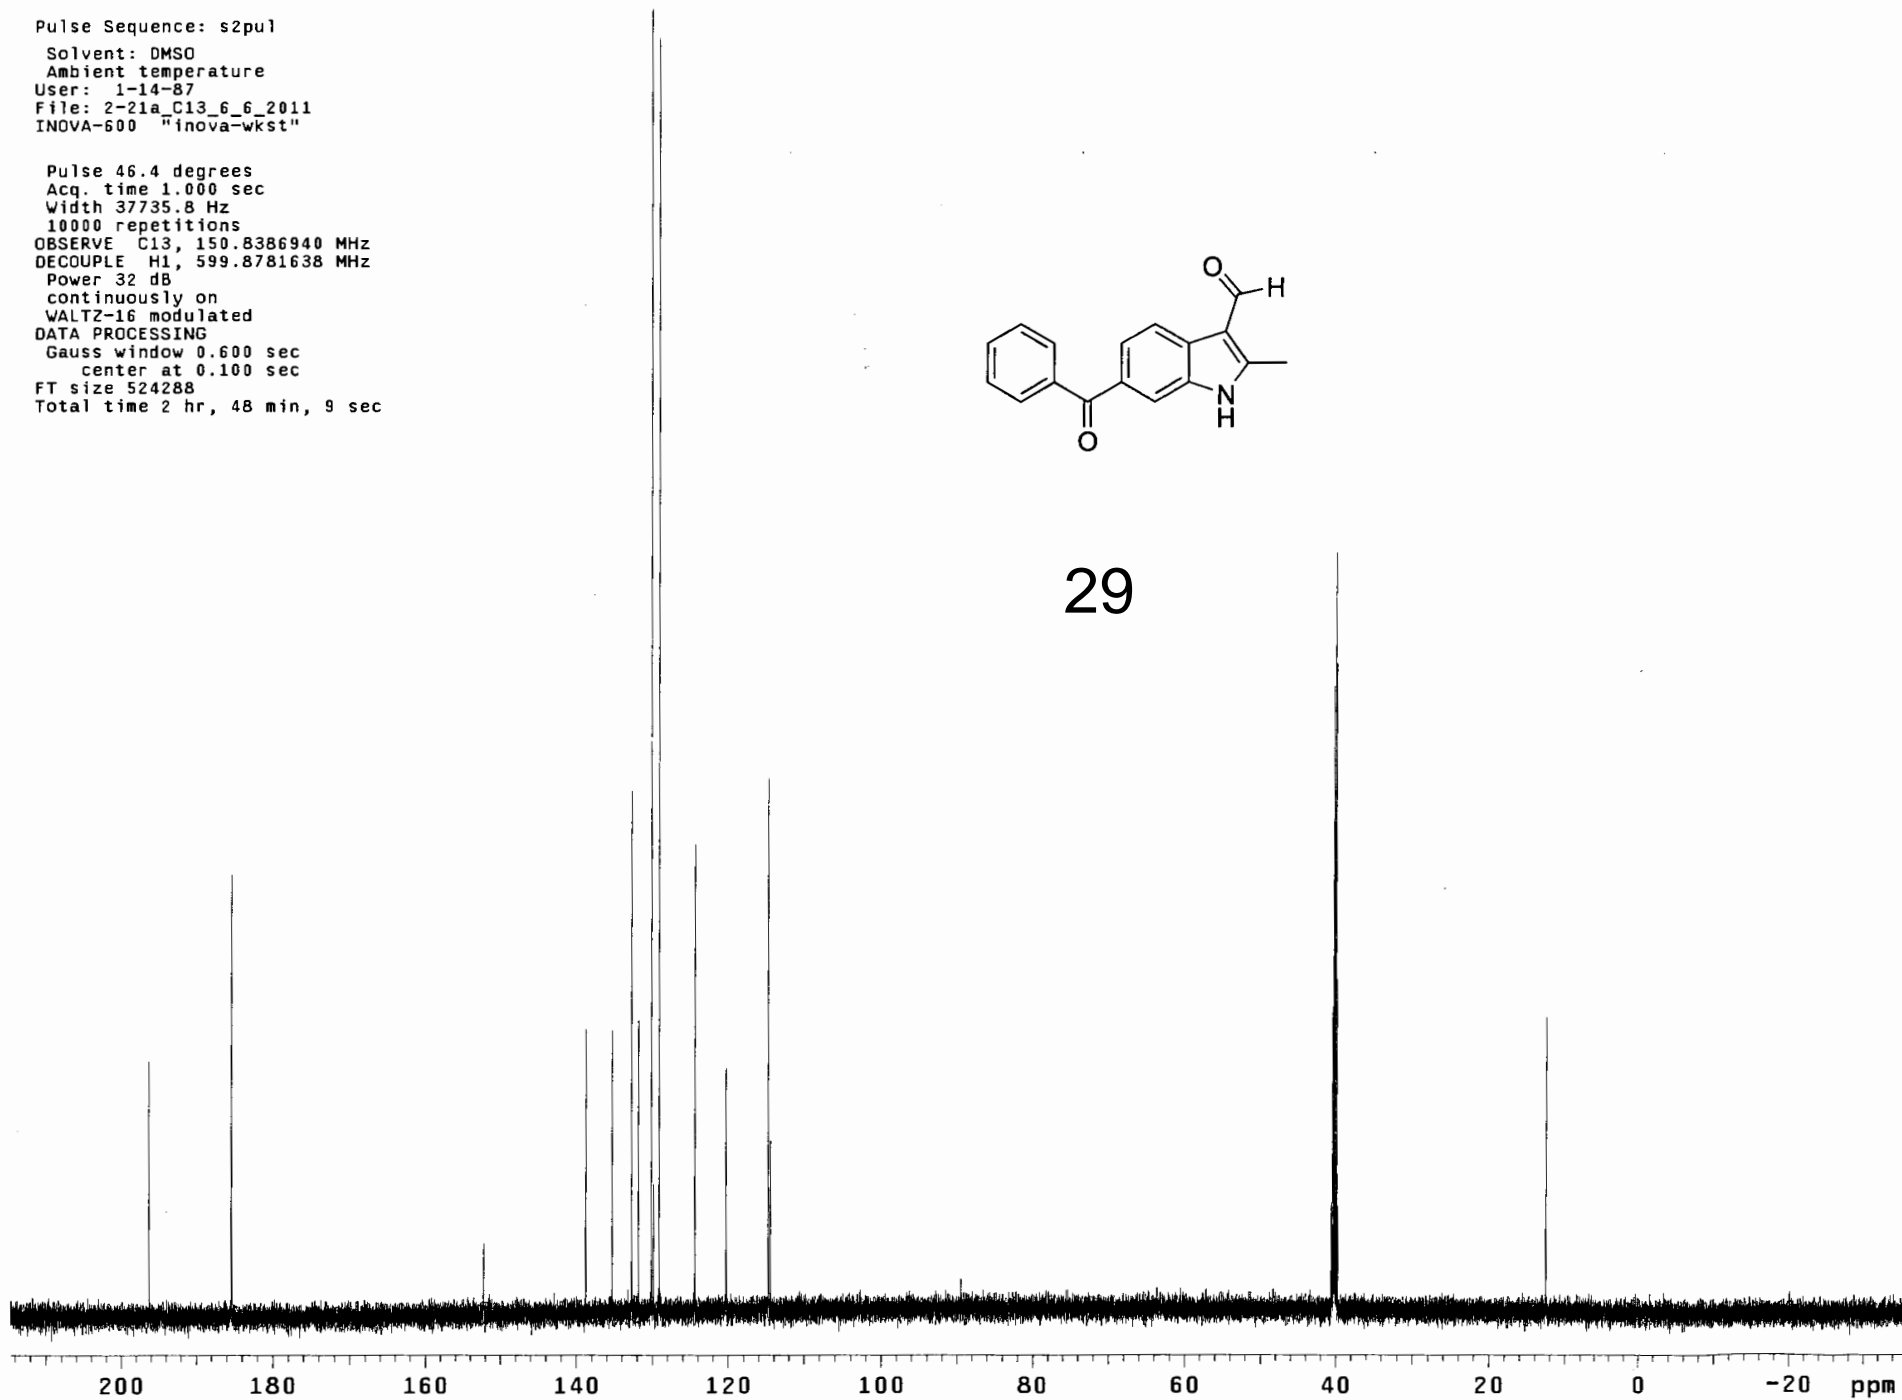

S71

STANDARD PROTON PARAMETERS

Pulse Sequence: gcosy

Solvent: DMSO

Temp. 20.0 C / 293.1 K

File: 2-25Acosy

INOVA-600 "inova-wkst"

Relax. delay 1.000 sec

Acq. time 0.230 sec

Width 1111.7 Hz

2D Width 1111.7 Hz

Single scan

46 increments

OBSERVE H1, 599.8751444 MHz

DATA PROCESSING

Sine bell 0.115 sec

F1 DATA PROCESSING

Sine bell 0.021 sec

FT size 512 x 512

Total time 1 min, 0 sec

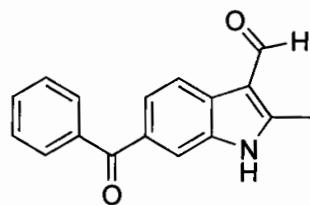

29

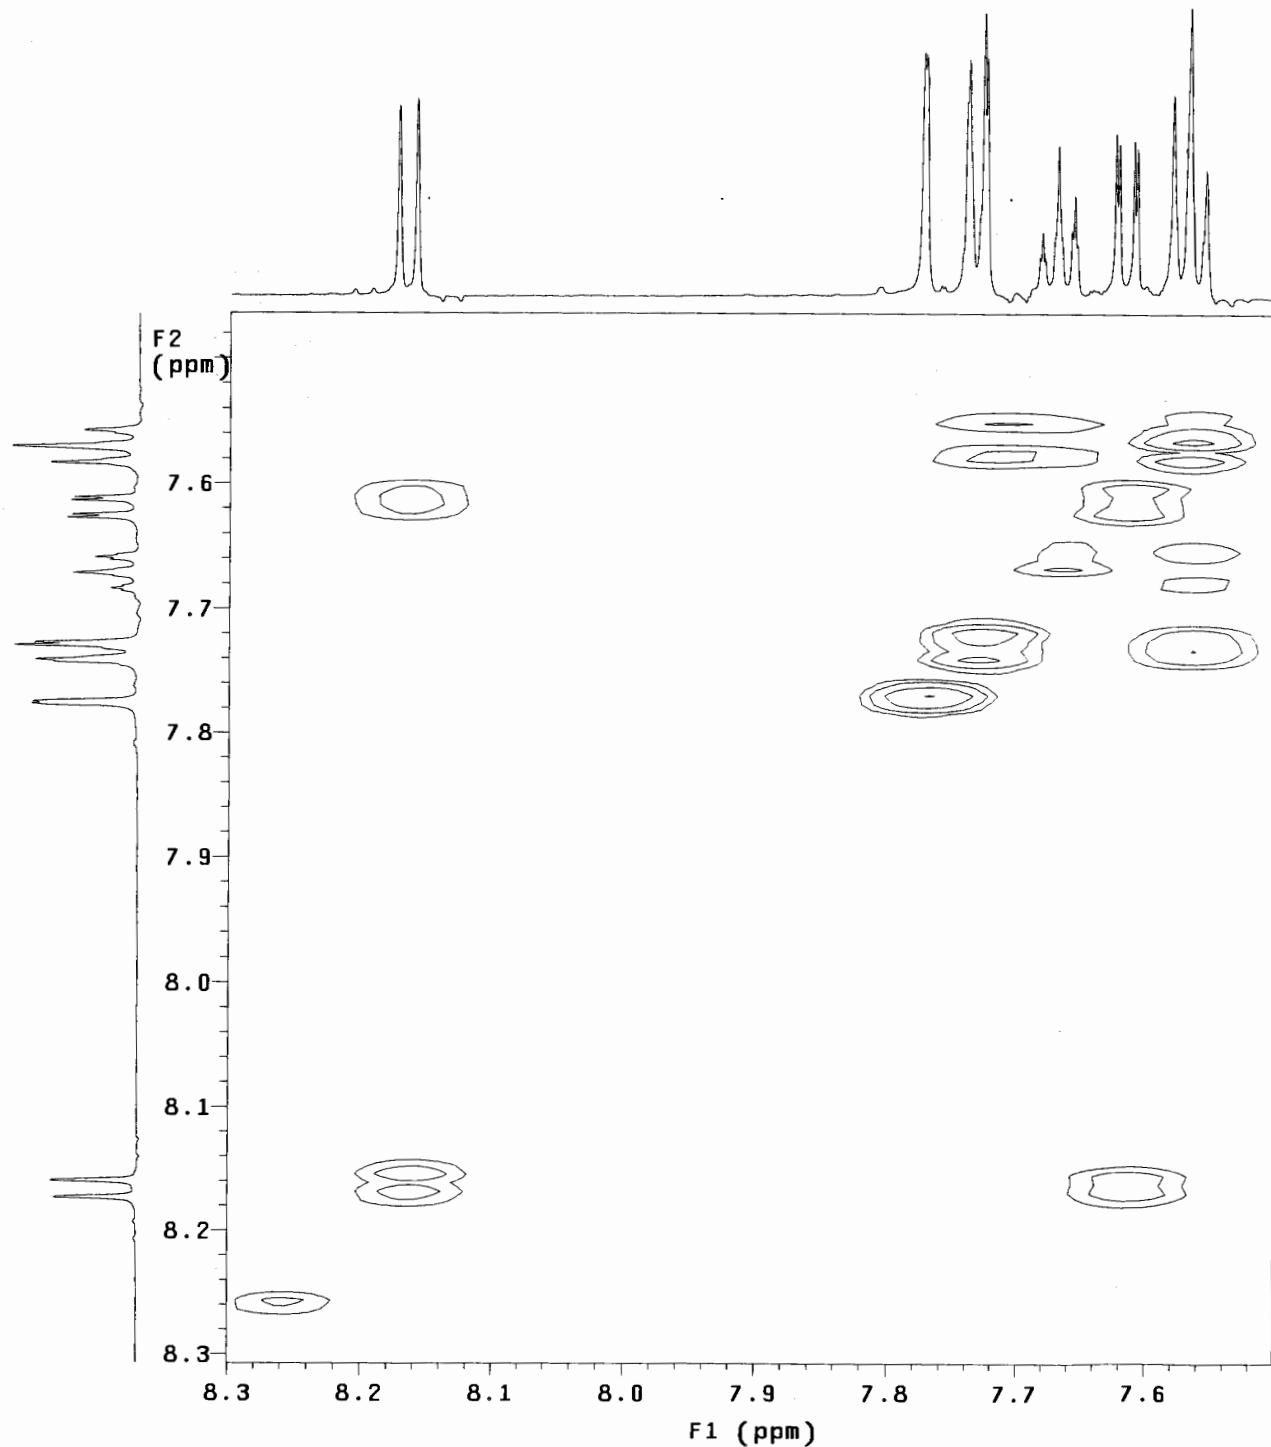

S72

STANDARD PROTON PARAMETERS

Pulse Sequence: s2pu1

Solvent: DMSO

Ambient temperature

File: 2-33.12-20-2010

INOVA-600 "inova-wkst"

Relax. delay 1.000 sec

Pulse 31.8 degrees

Acq. time 3.000 sec

Width 8999.9 Hz

16 repetitions

OBSERVE H1, 599.8751451 MHz

DATA PROCESSING

Line broadening 0.4 Hz

FT size 131072

Total time 1 min, 4 sec

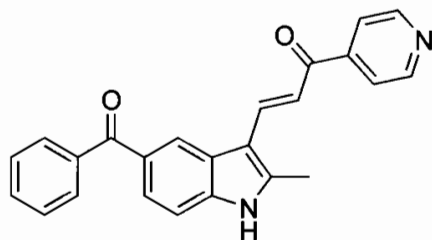

30

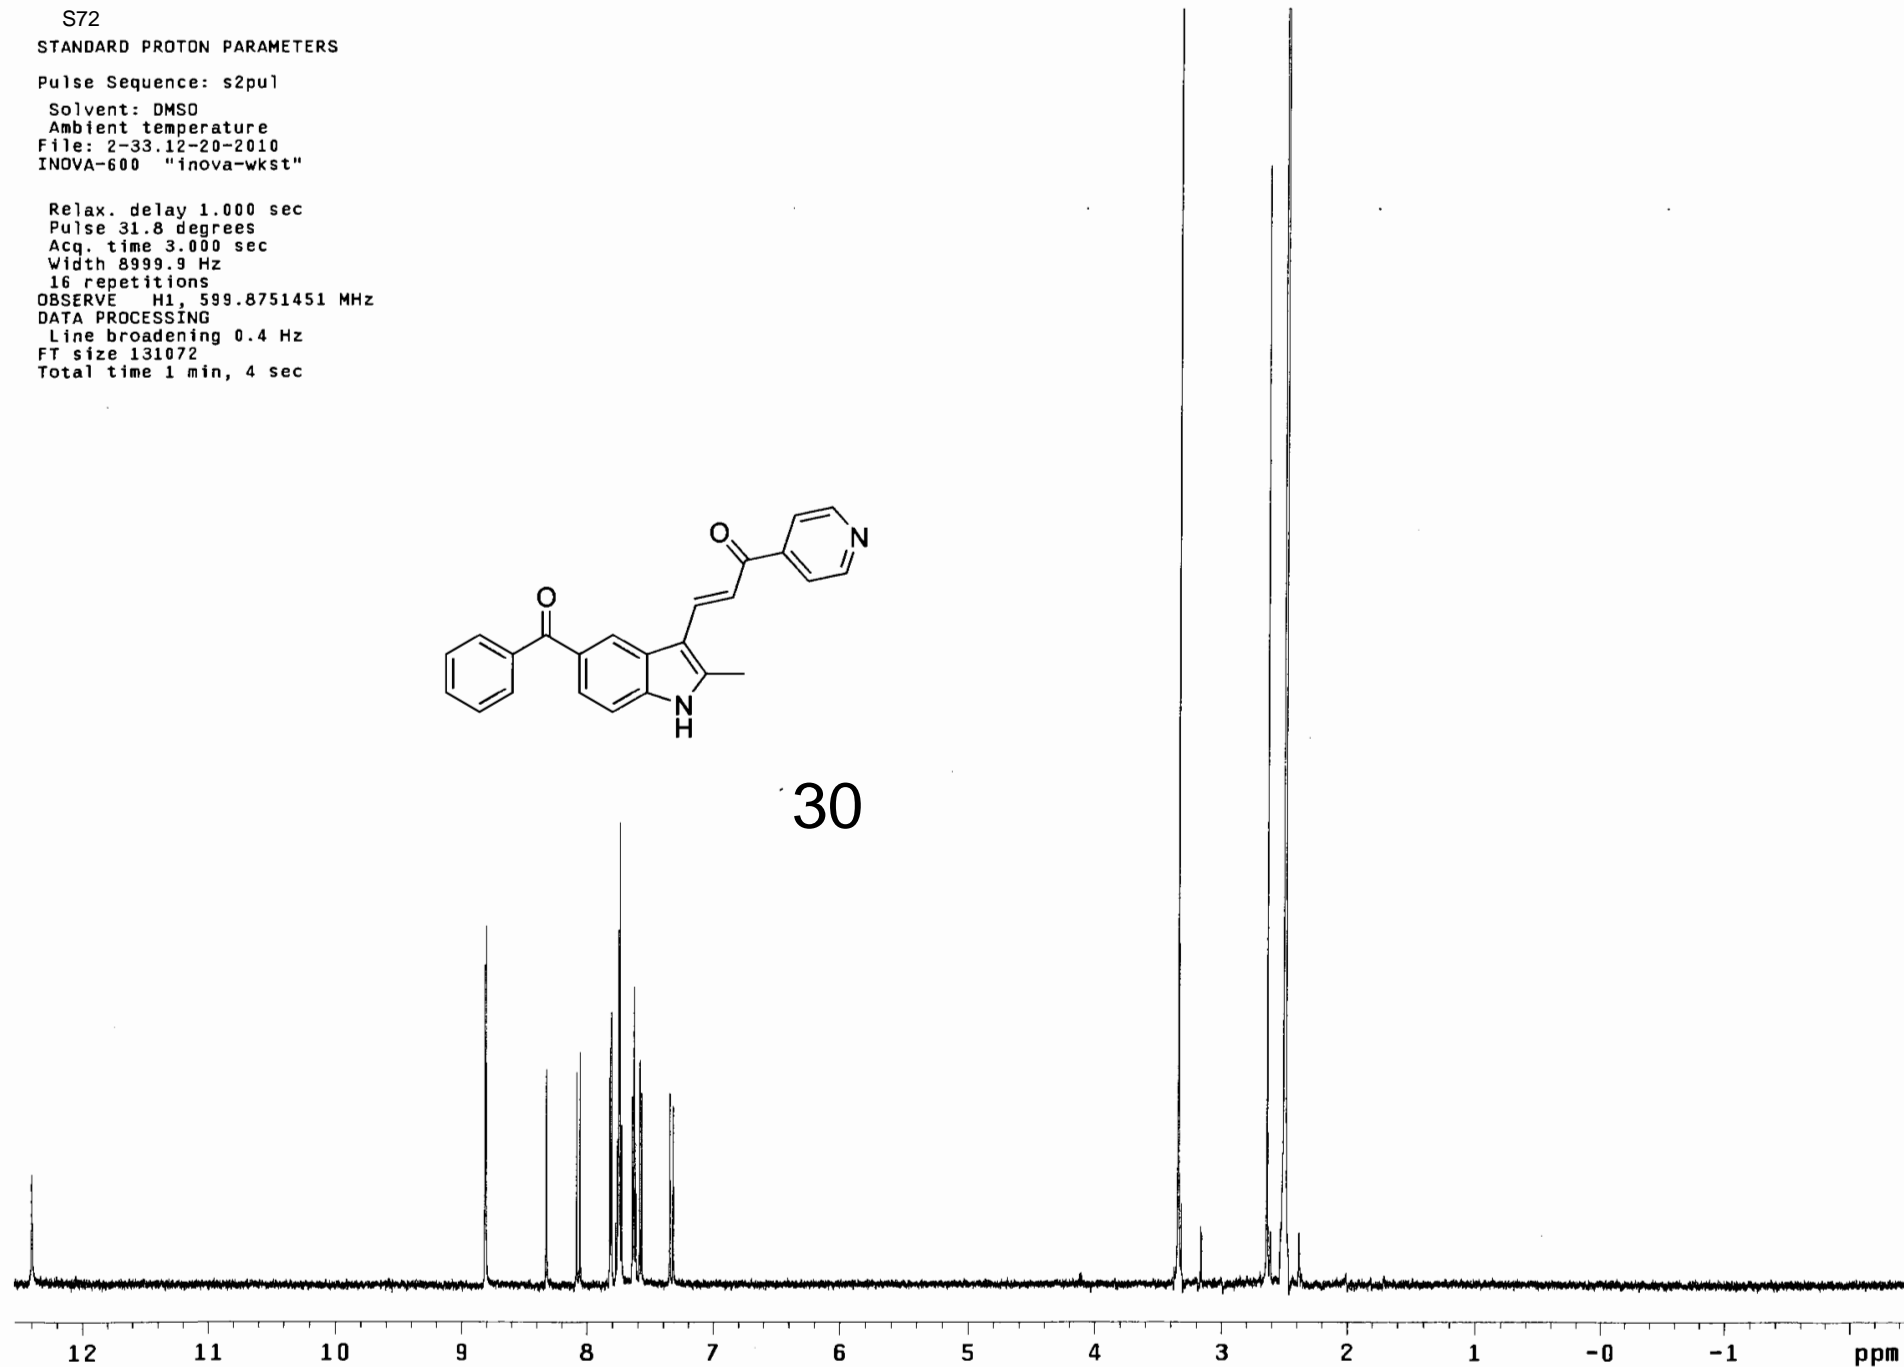



S73

STANDARD PROTON PARAMETERS

Dec 8 2010

Pulse Sequence: cyclenoe

Solvent: DMSO  
Temp. 20.0 C / 293.1 K  
File: 2-25aNOEnitrogen  
INOVA-600 "inova-wkst"

Relax. delay 1.000 sec  
Pulse 90.0 degrees  
Mixing 0.000 sec  
Acq. time 3.000 sec  
Width 8999.9 Hz  
96 repetitions  
OBSERVE H1, 599.8751444 MHz  
DATA PROCESSING  
Line broadening 0.4 Hz  
FT size 131072  
Total time 17 min, 22 sec

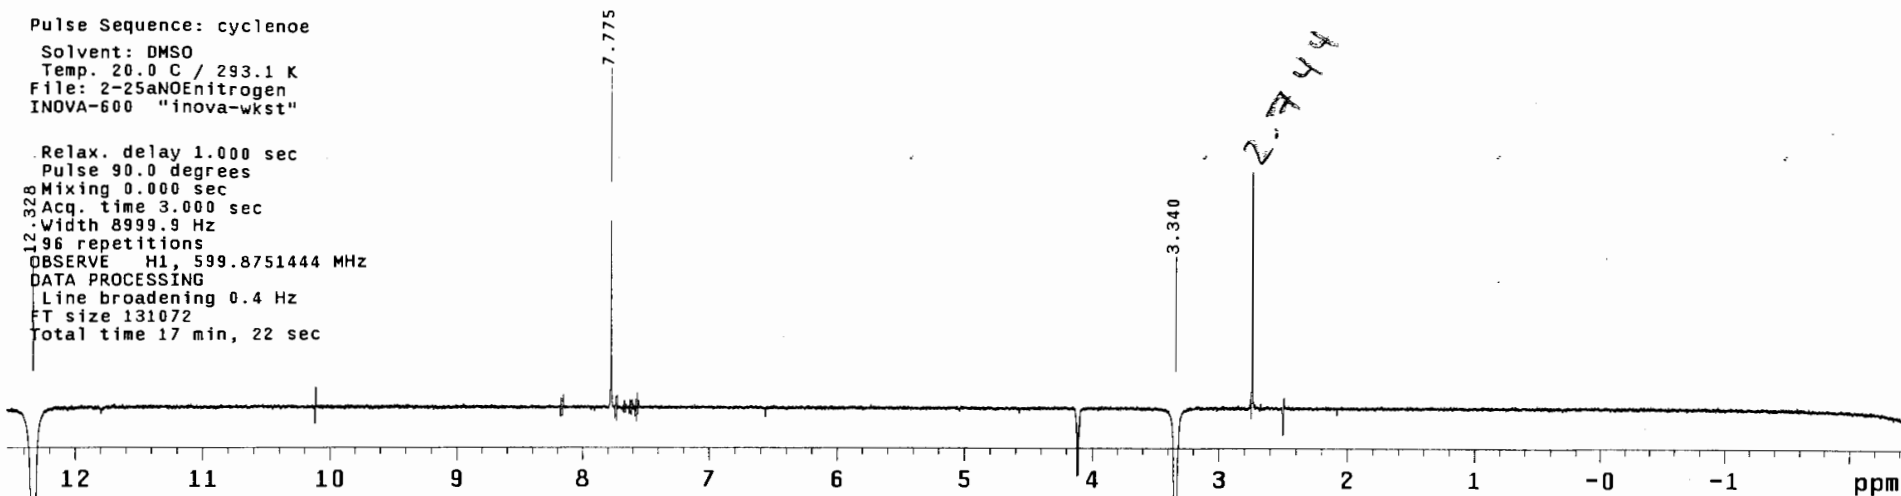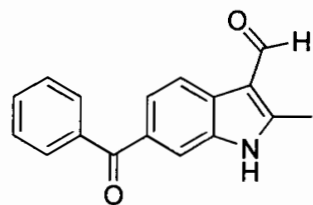

29

S74  
STANDARD PROTON PARAMETERS  
Pulse Sequence: cyclenoe  
Solvent: DMSO  
Temp. 20.0 C / 293.1 K  
File: 2-25aNOEch  
INNOVA-600 "inova-wkst"  
Relax. delay 1.000 sec  
Pulse 90.0 degrees  
Mixing 0.000 sec  
Acq. time 3.000 sec  
Width 8999.9 Hz  
128 repetitions  
OBSERVE H1, 599.8751444 MHz  
DATA PROCESSING  
Line broadening 0.4 Hz  
FT size 131072  
Total time 17 min, 22 sec

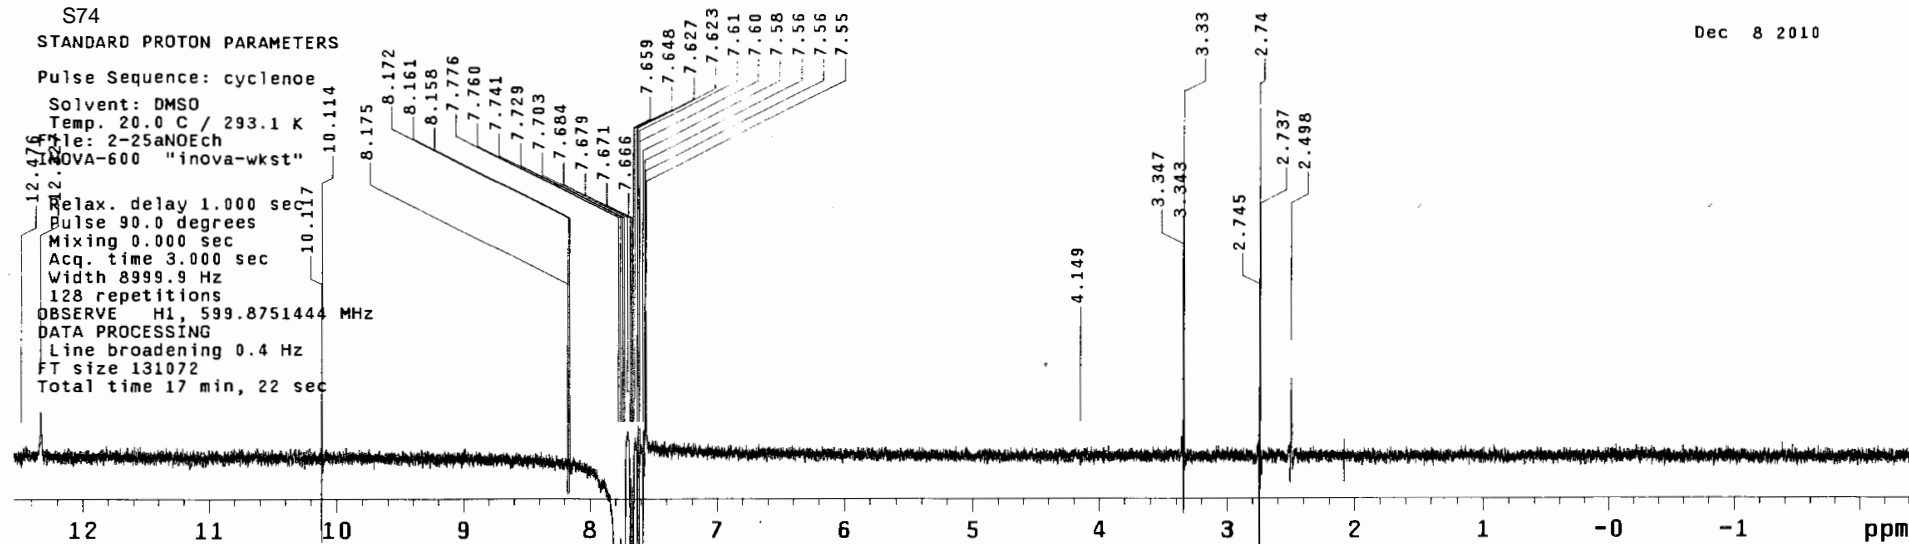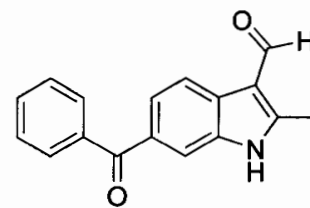

29

S75

STANDARD PROTON PARAMETERS

Pulse Sequence: gcosy

Solvent: DMSO

Temp. 26.0 C / 299.1 K

File: 2-33\_cosy\_4\_29\_2011

INOVA-600 "inova-wkst"

Relax. delay 1.000 sec

Acq. time 0.197 sec

Width 1301.4 Hz

2D Width 1301.4 Hz

Single scan

54 increments

OBSERVE H1, 599.8751452 MHz

DATA PROCESSING

Sine bell 0.098 sec

F1 DATA PROCESSING

Sine bell 0.021 sec

FT size 512 x 512

Total time 1 min, 8 sec

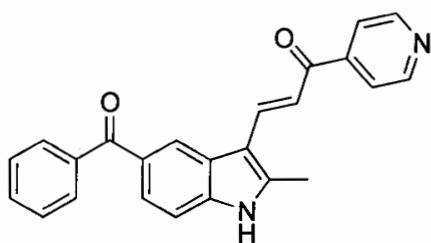

30

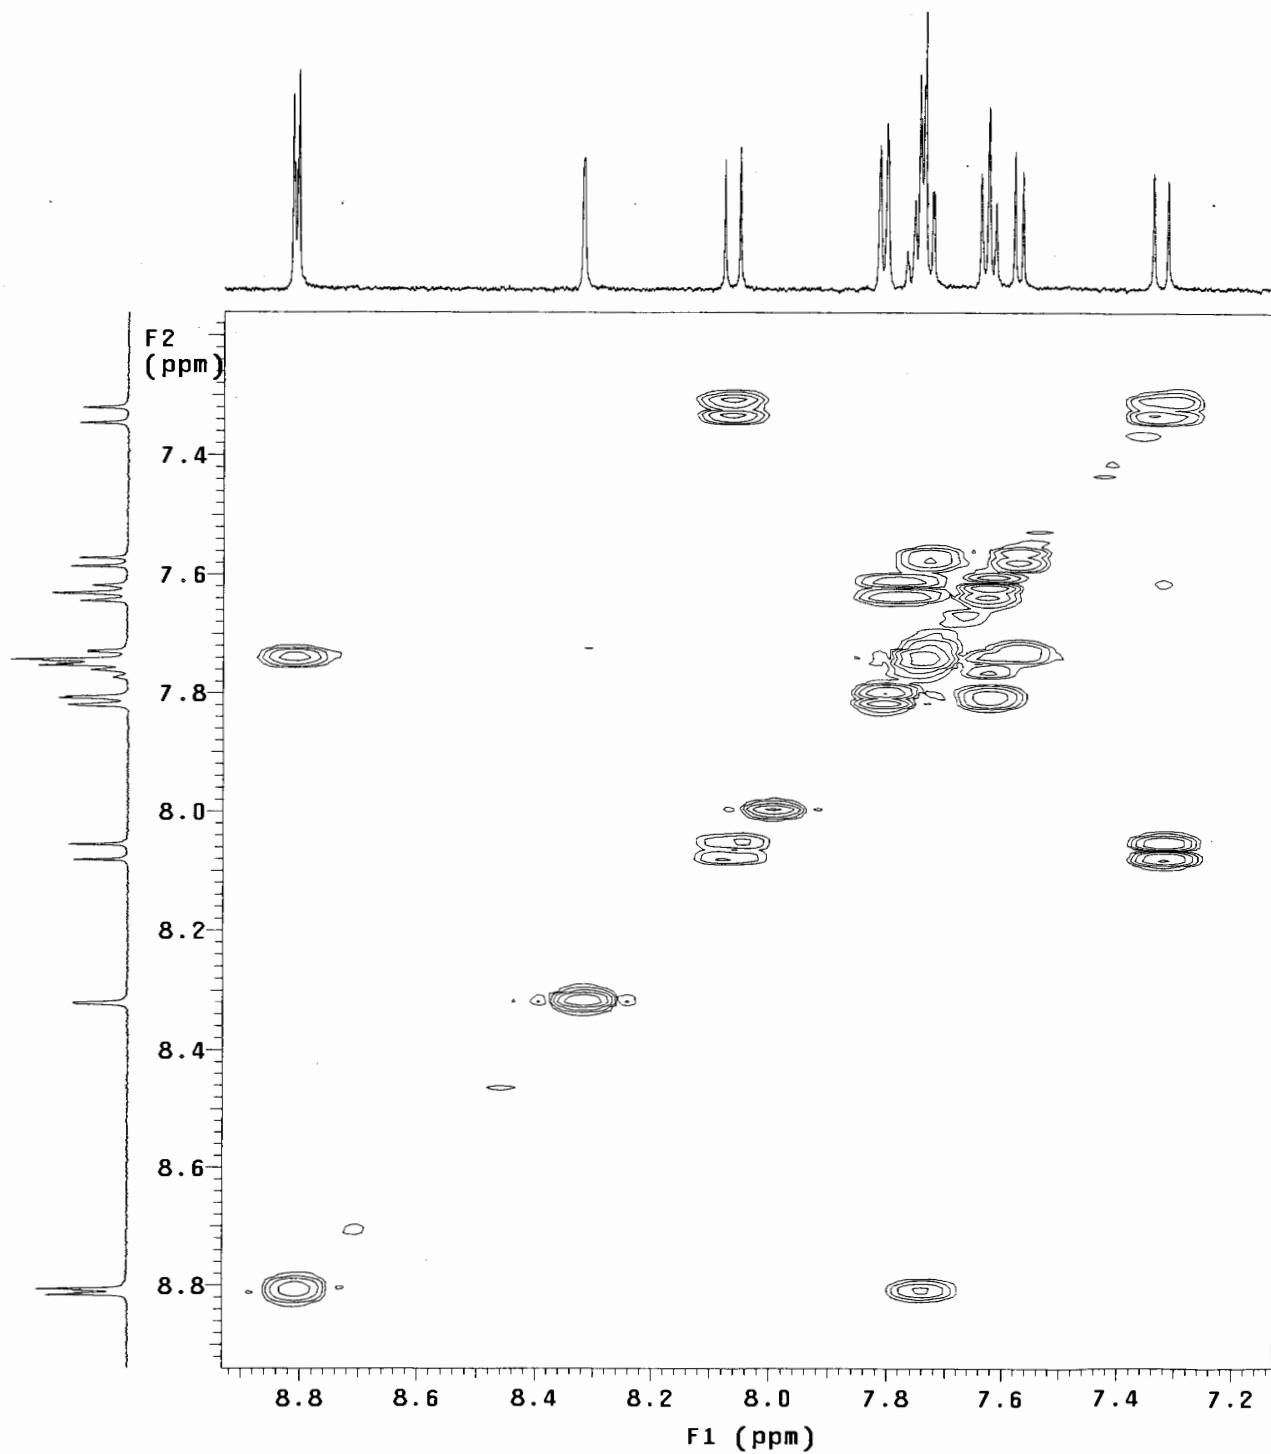

S76

STANDARD CARBON PARAMETERS

Pulse Sequence: s2pu1

Solvent: DMSO

Temp. 23.0 C / 296.1 K

User: 1-14-87

File: 2-27b\_13C\_6\_12\_2011

INOVA-600 "inova600"

Jun 12 2011

Pulse 46.4 degrees

Acq. time 1.000 sec

Width 37735.8 Hz

50336 repetitions

OBSERVE C13, 150.8387978 MHz

DECOUPLE H1, 599.8781638 MHz

Power 32 dB

continuously on

WALTZ-16 modulated

DATA PROCESSING

Gauss window 0.600 sec

center at 0.100 sec

FT size 524288

Total time 28 hr, 1 min, 31 sec

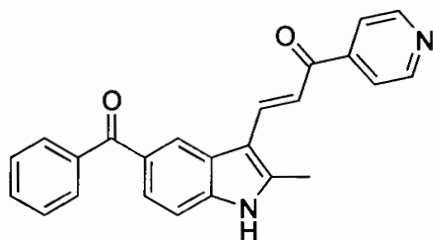

30

39.788  
39.669  
39.649  
39.530  
39.510  
39.371  
39.231

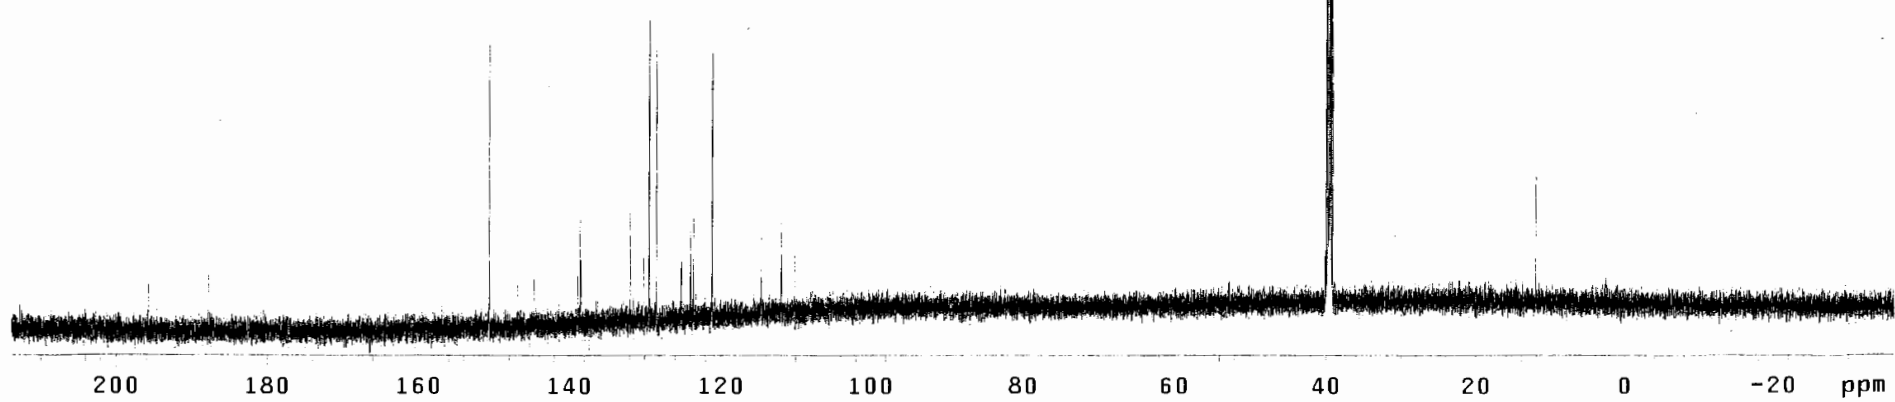

S77

STANDARD PROTON PARAMETERS

Pulse Sequence: s2pu1

Solvent: DMSO

Ambient temperature

File: 2-29h1

INOVA-600 "inova-wkst"

Relax. delay 1.000 sec

Pulse 31.8 degrees

Acq. time 3.000 sec

Width 8999.9 Hz

16 repetitions

OBSERVE H1, 599.8751457 MHz

DATA PROCESSING

Line broadening 0.4 Hz

FT size 131072

Total time 1 min, 4 sec

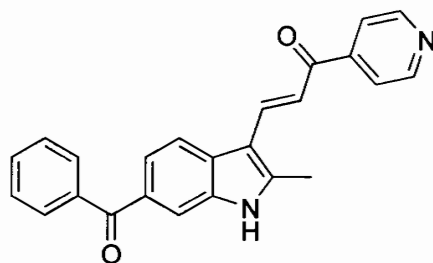

31

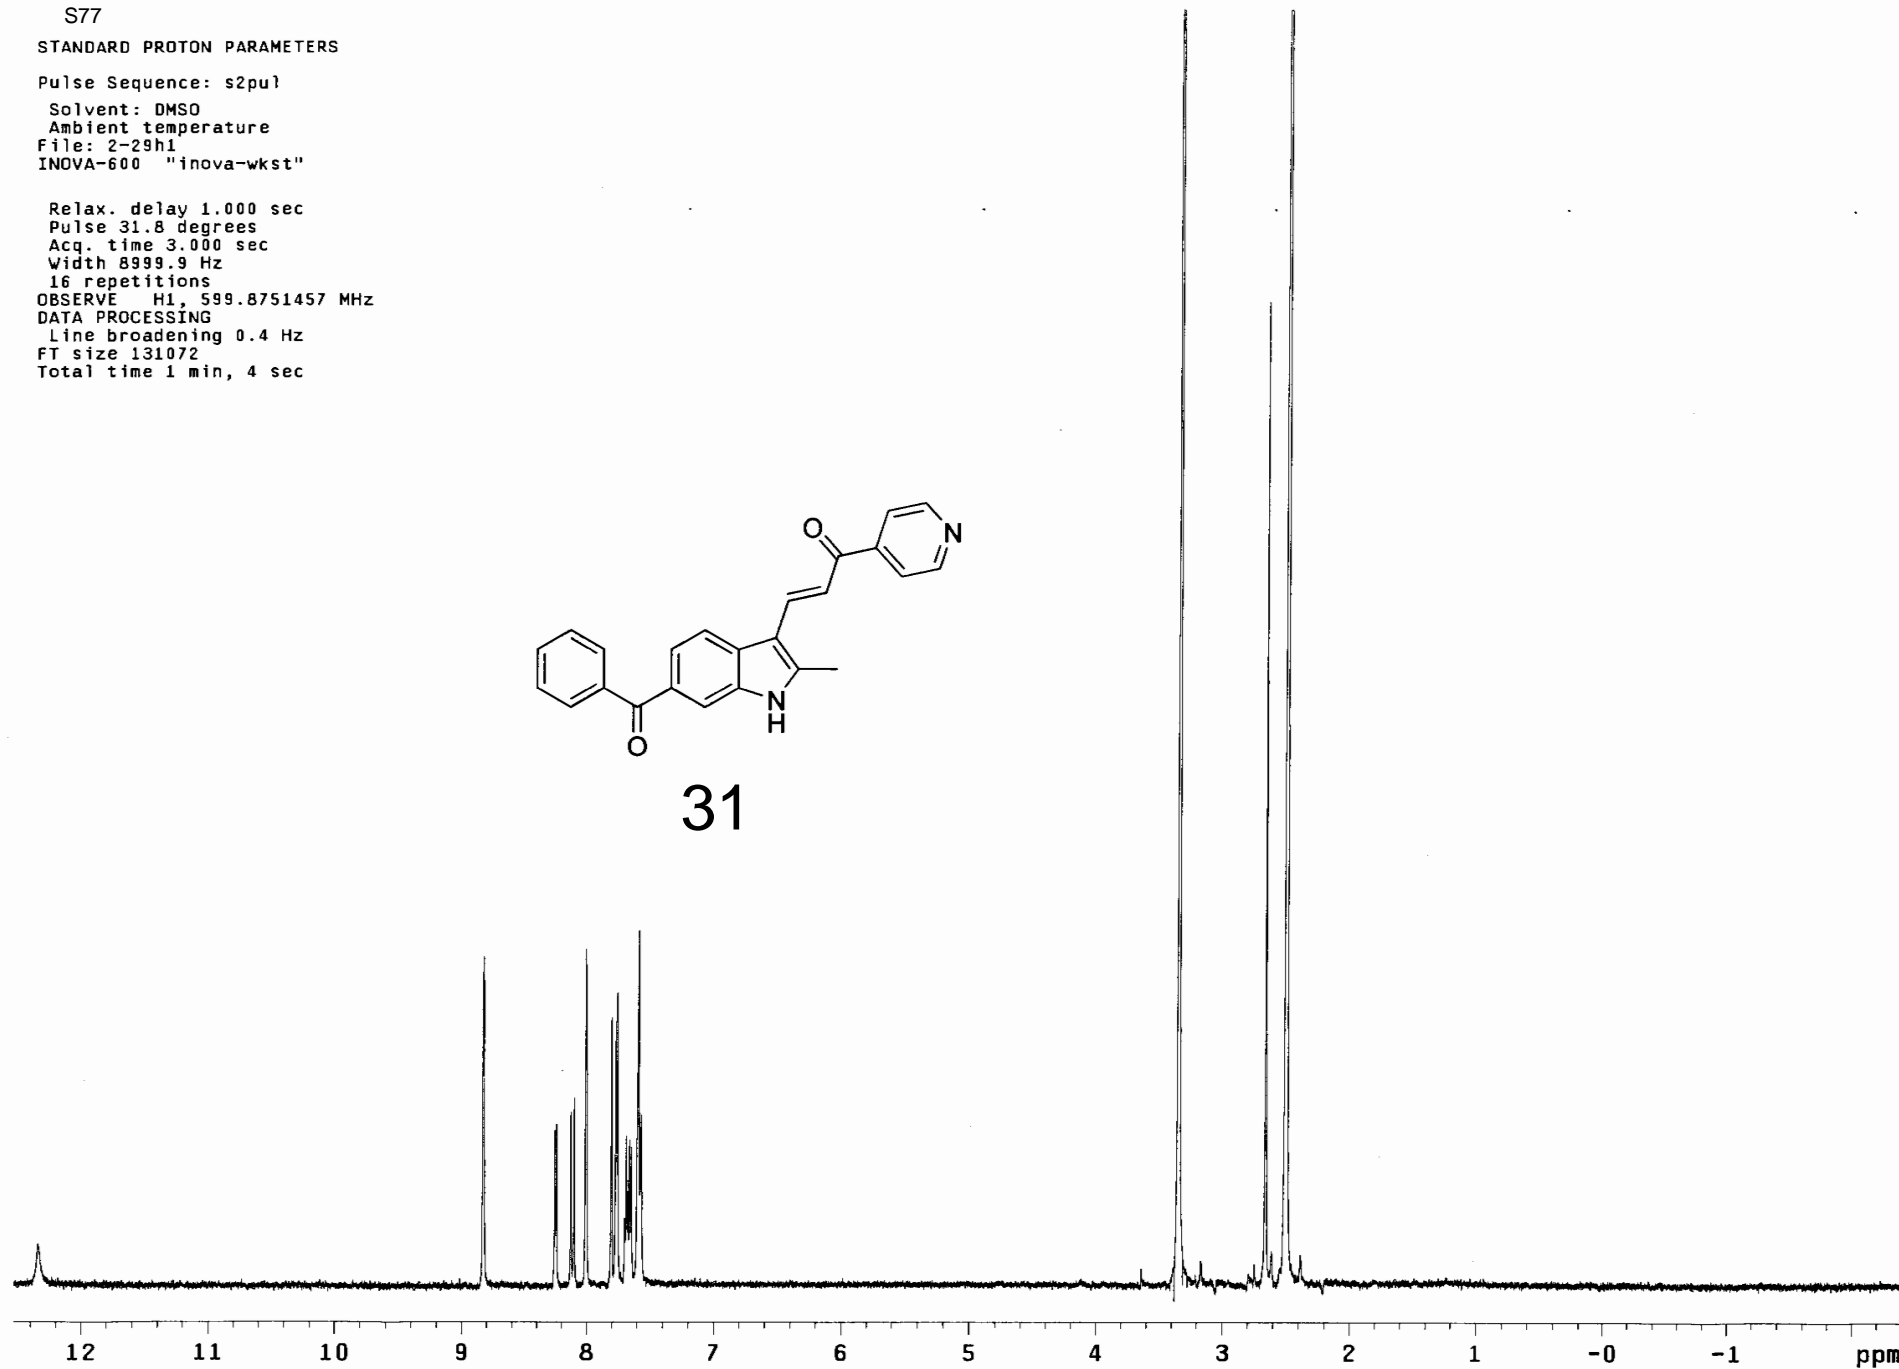

S78

STANDARD CARBON PARAMETERS

Jun 12 2011

Pulse Sequence: s2pu1

Solvent: DMSO  
Temp: 23.0 C / 296.1 K  
User: 1-14-87  
INOVA-600 "inova600"

Pulse 46.4 degrees  
Acq. time 1.000 sec  
Width 37735.8 Hz  
2208 repetitions  
OBSERVE C13, 150.8387986 MHz  
DECOUPLE H1, 599.8781638 MHz  
Power 32 dB  
continuously on  
WALTZ-16 modulated  
DATA PROCESSING  
Gauss window 0.600 sec  
center at 0.100 sec  
FT size 524288  
Total time 2 hr, 48 min, 9 sec

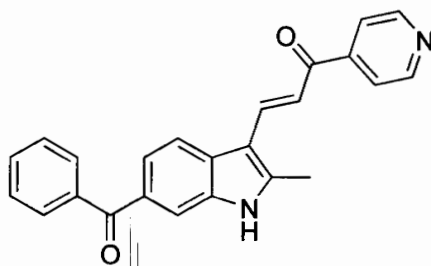

31

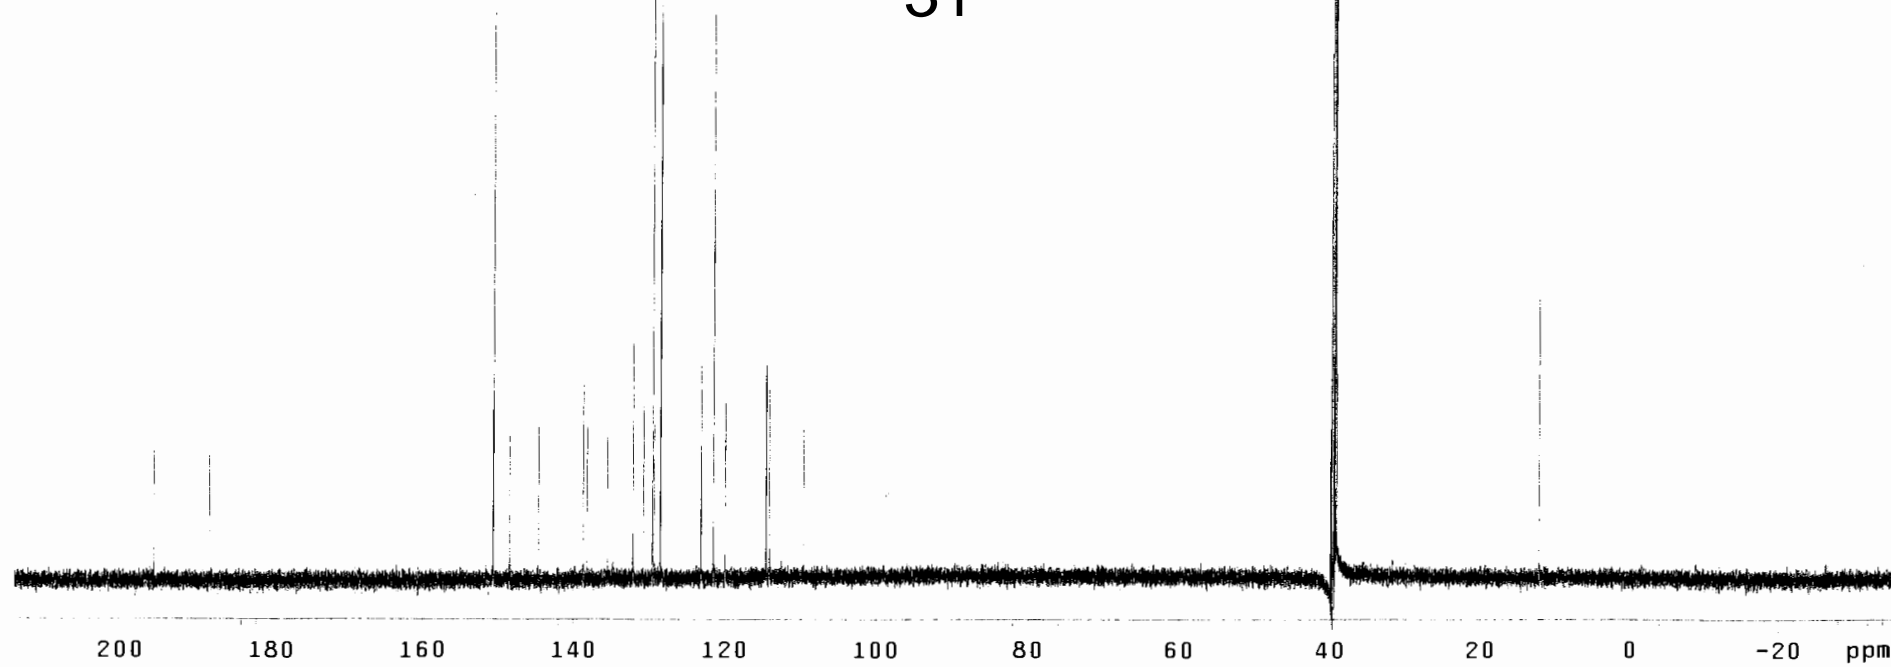

S79

STANDARD PROTON PARAMETERS

Pulse Sequence: gcosy

Solvent: DMSO  
Ambient temperature  
File: 2-29cosy  
INOVA-600 "inova-wkst"

Relax. delay 1.000 sec  
Acq. time 0.167 sec  
Width 1537.4 Hz  
2D Width 1537.4 Hz  
Single scan  
64 increments

OBSERVE H1, 599.8751457 MHz  
DATA PROCESSING  
Sine bell 0.083 sec  
F1 DATA PROCESSING  
Sine bell 0.021 sec  
FT size 512 x 512  
Total time 1 min, 19 sec

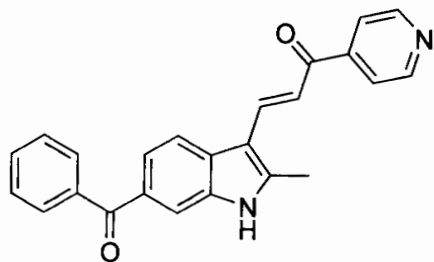

31

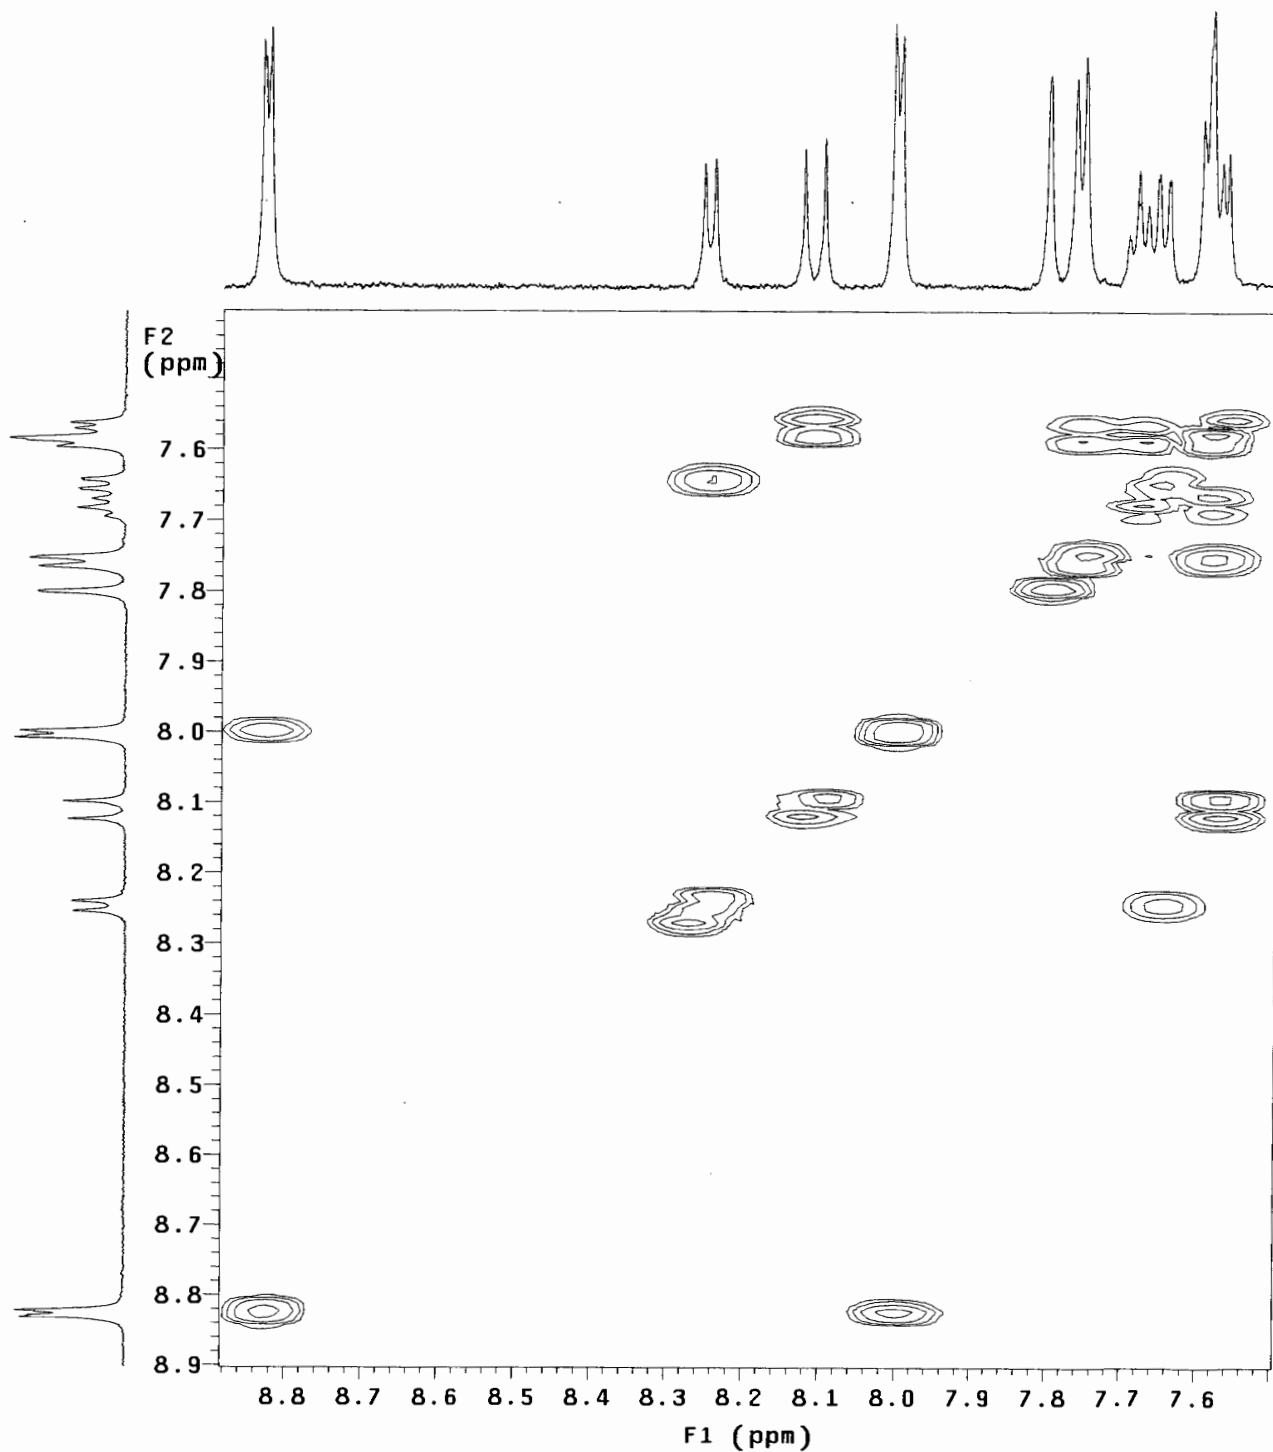

S80  
STANDARD PROTON PARAMETERS

Pulse Sequence: s2pu1  
Solvent: DMSO  
Ambient temperature  
File: 2\_63\_1h\_3\_14\_2011  
INOVA-600 "inova600"

Relax. delay 1.000 sec  
Pulse 31.8 degrees  
Acq. time 3.000 sec  
Width 8999.9 Hz  
16 repetitions  
OBSERVE H1, 599.8751436 MHz  
DATA PROCESSING  
Line broadening 0.4 Hz  
FT size 131072  
Total time 1 min, 4 sec

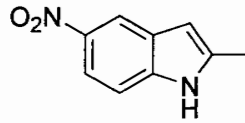

32

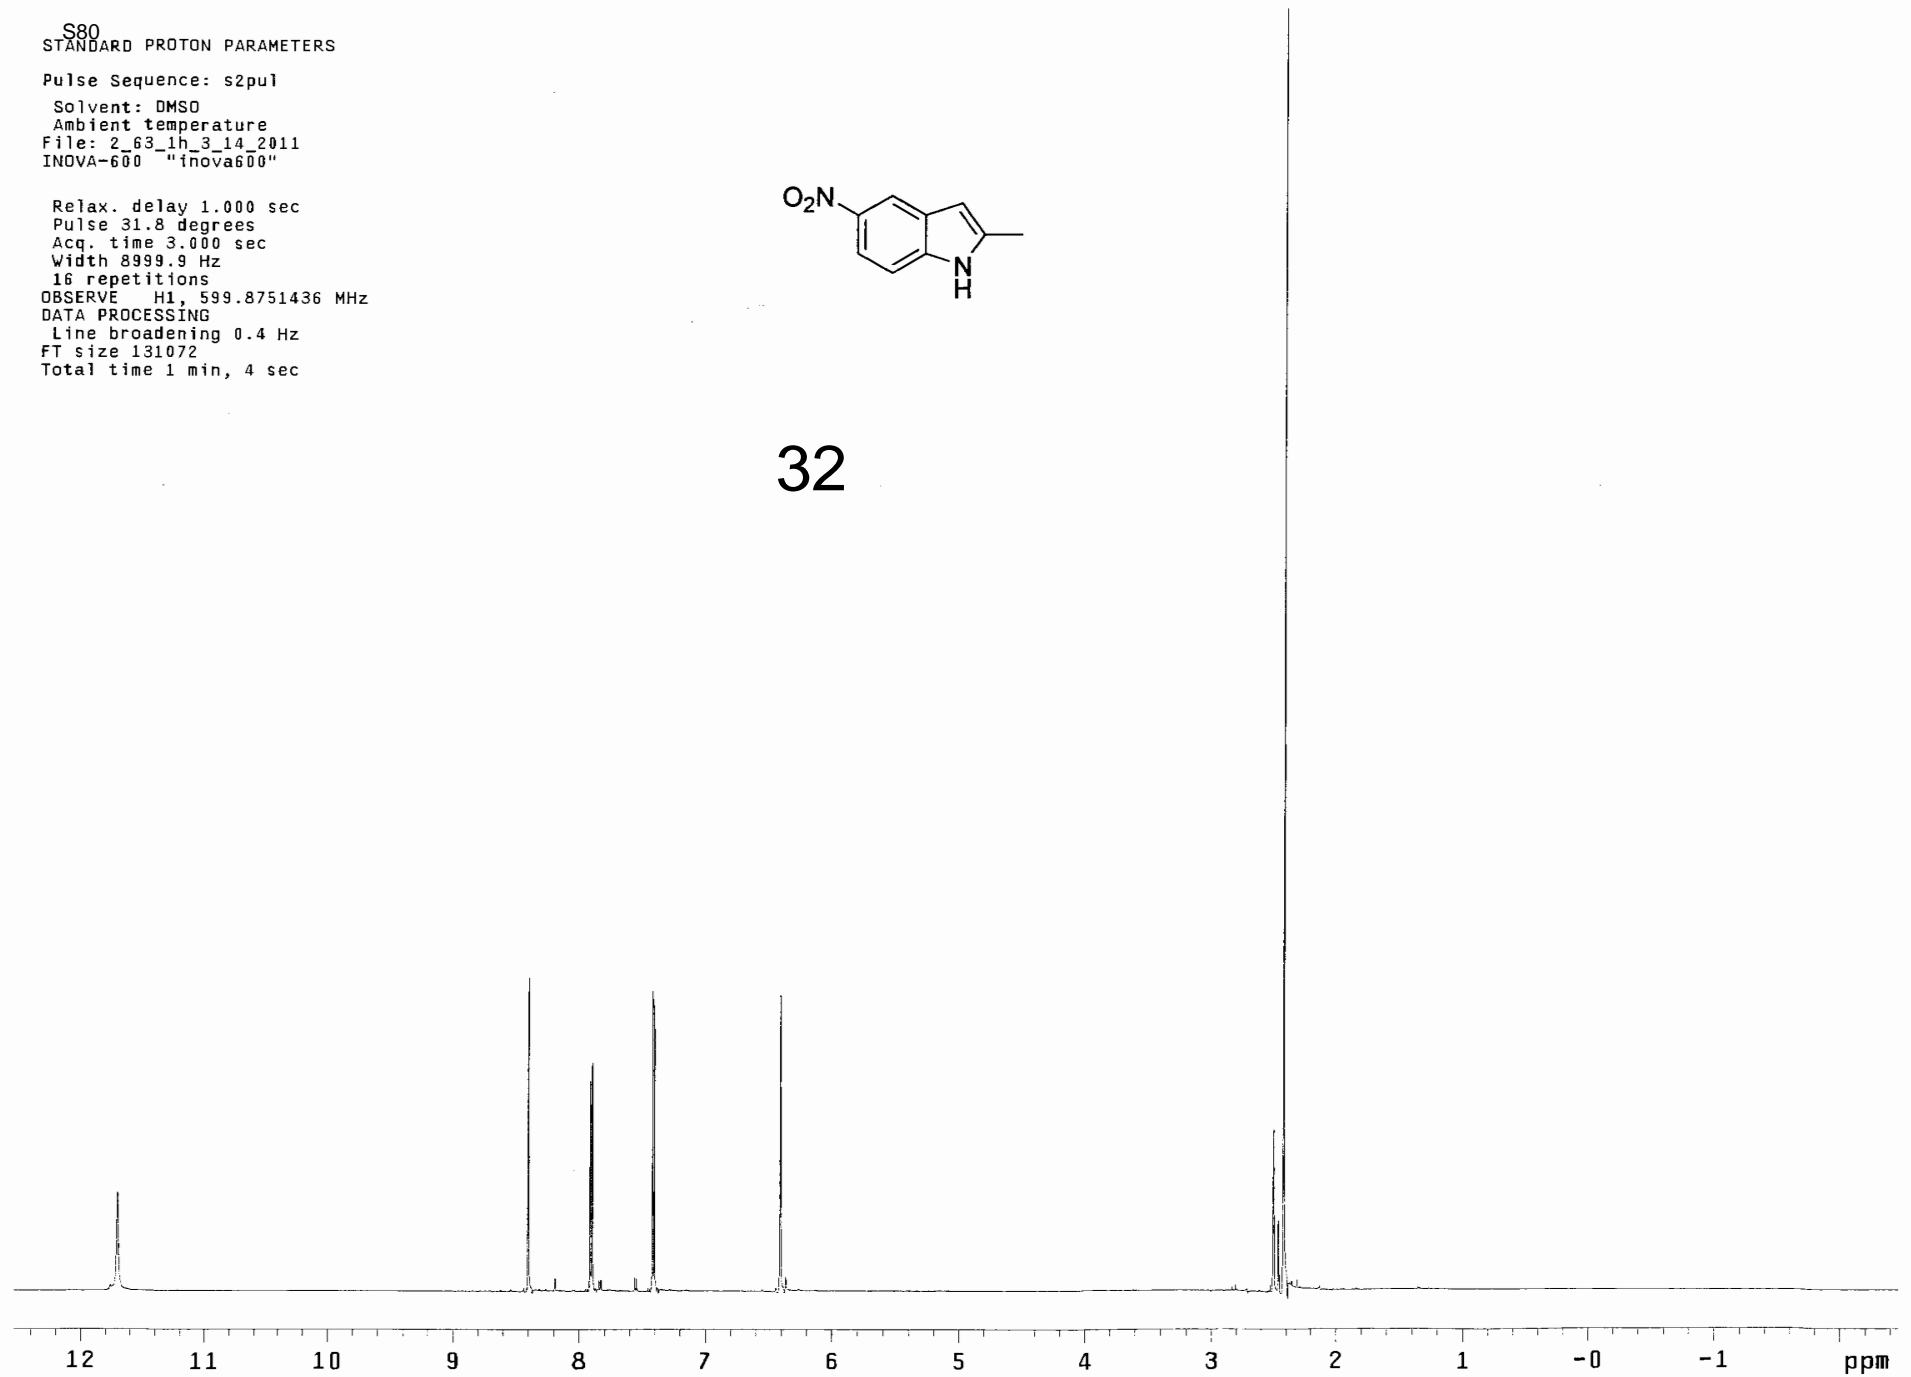



S81

STANDARD CARBON PARAMETERS

Pulse Sequence: s2pul

Solvent: DMSO

Ambient temperature

User: 1-14-87

File: 2-63\_13C\_3\_14\_2011

INOVA-600 "inova600"

Pulse 46.4 degrees

Acq. time 1.000 sec

Width 37735.8 Hz

5456 repetitions

OBSERVE C13, 150.8387910 MHz

DECOUPLE H1, 599.8781638 MHz

Power 32 dB

continuously on

WALTZ-16 modulated

DATA PROCESSING

Gauss window 0.600 sec

center at 0.100 sec

FT size 524288

Total time 28 hr, 1 min, 31 sec

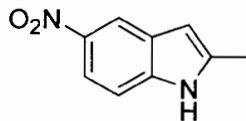

32

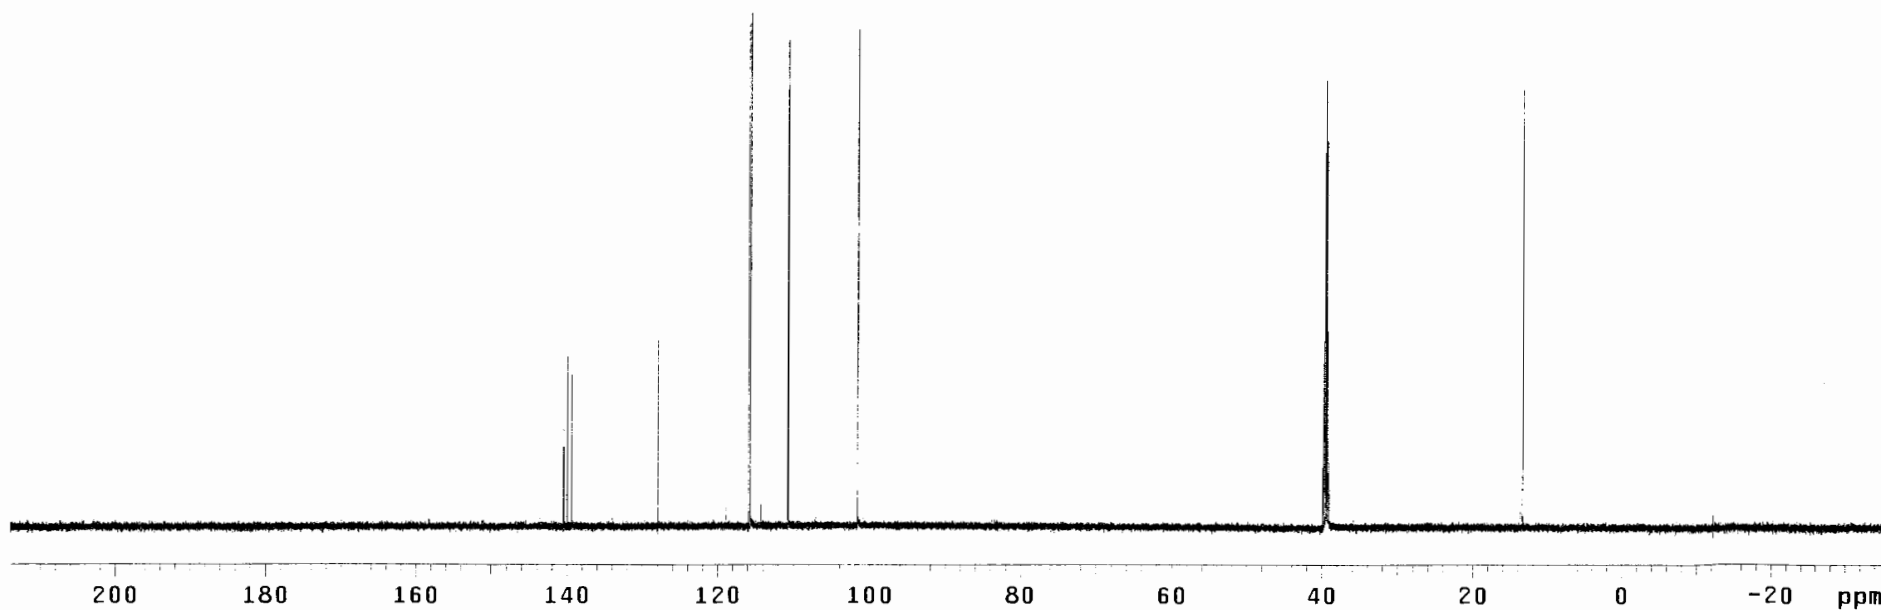

S82

STANDARD PROTON PARAMETERS

Pulse Sequence: gcosy

Solvent: DMSO

Ambient temperature

File: 2-63\_cosy\_3\_14\_2011

INOVA-600 "inova600"

Relax. delay 1.000 sec

Acq. time 0.132 sec

Width 1939.5 Hz

2D Width 1939.5 Hz

Single scan

80 increments

OBSERVE H1, 599.8751436 MHz

DATA PROCESSING

Sine bell 0.066 sec

F1 DATA PROCESSING

Sine bell 0.021 sec

FT size 512 x 512

Total time 1 min, 35 sec

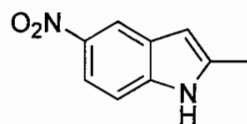

32

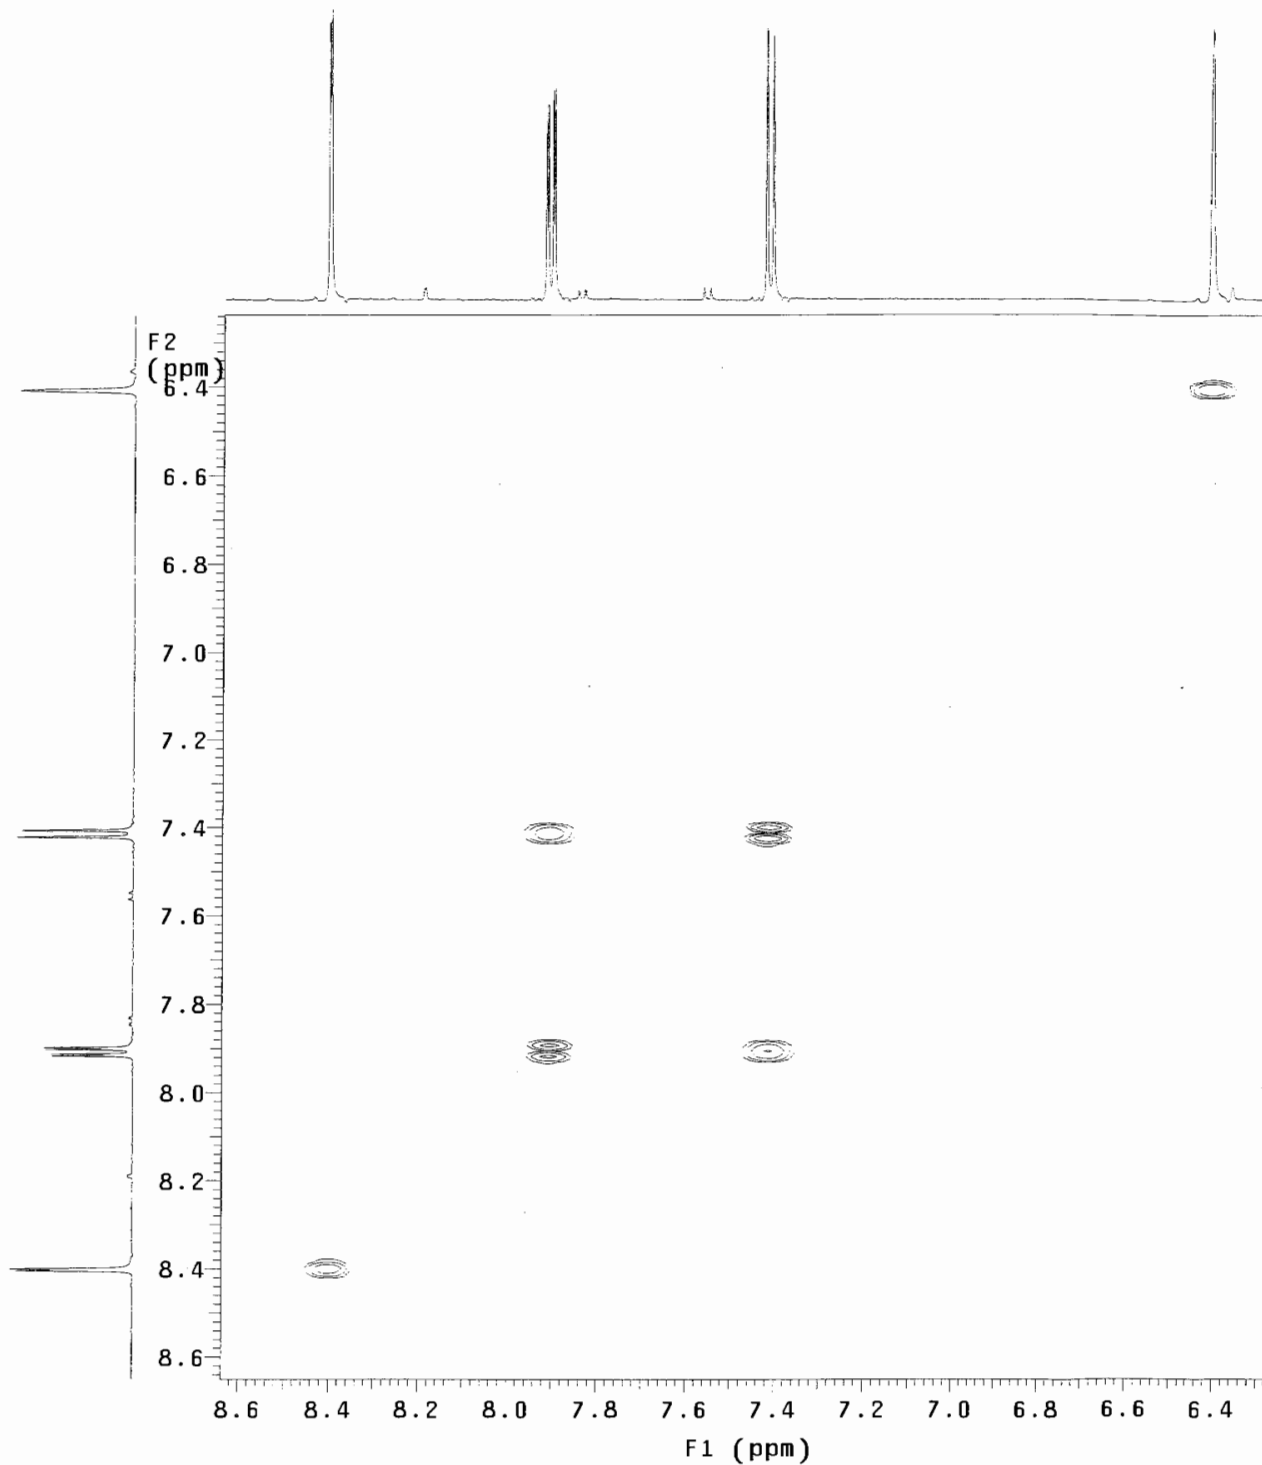

S83

STANDARD PROTON PARAMETERS

Mar 15 2011

Pulse Sequence: cyclenoe

Solvent: DMSO

Temp. 22.0 C / 295.1 K

INOVA-600 "inova600"

Relax. delay 1.000 sec

Pulse 90.0 degrees

Mixing 0.000 sec

Acq. time 1.000 sec

Width 9000.9 Hz

32 repetitions

OBSERVE H1, 599.8751438 MHz

DATA PROCESSING

Gauss apodization 0.200 sec

FT size 131072

Total time 3 min, 12 sec

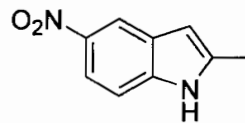

32

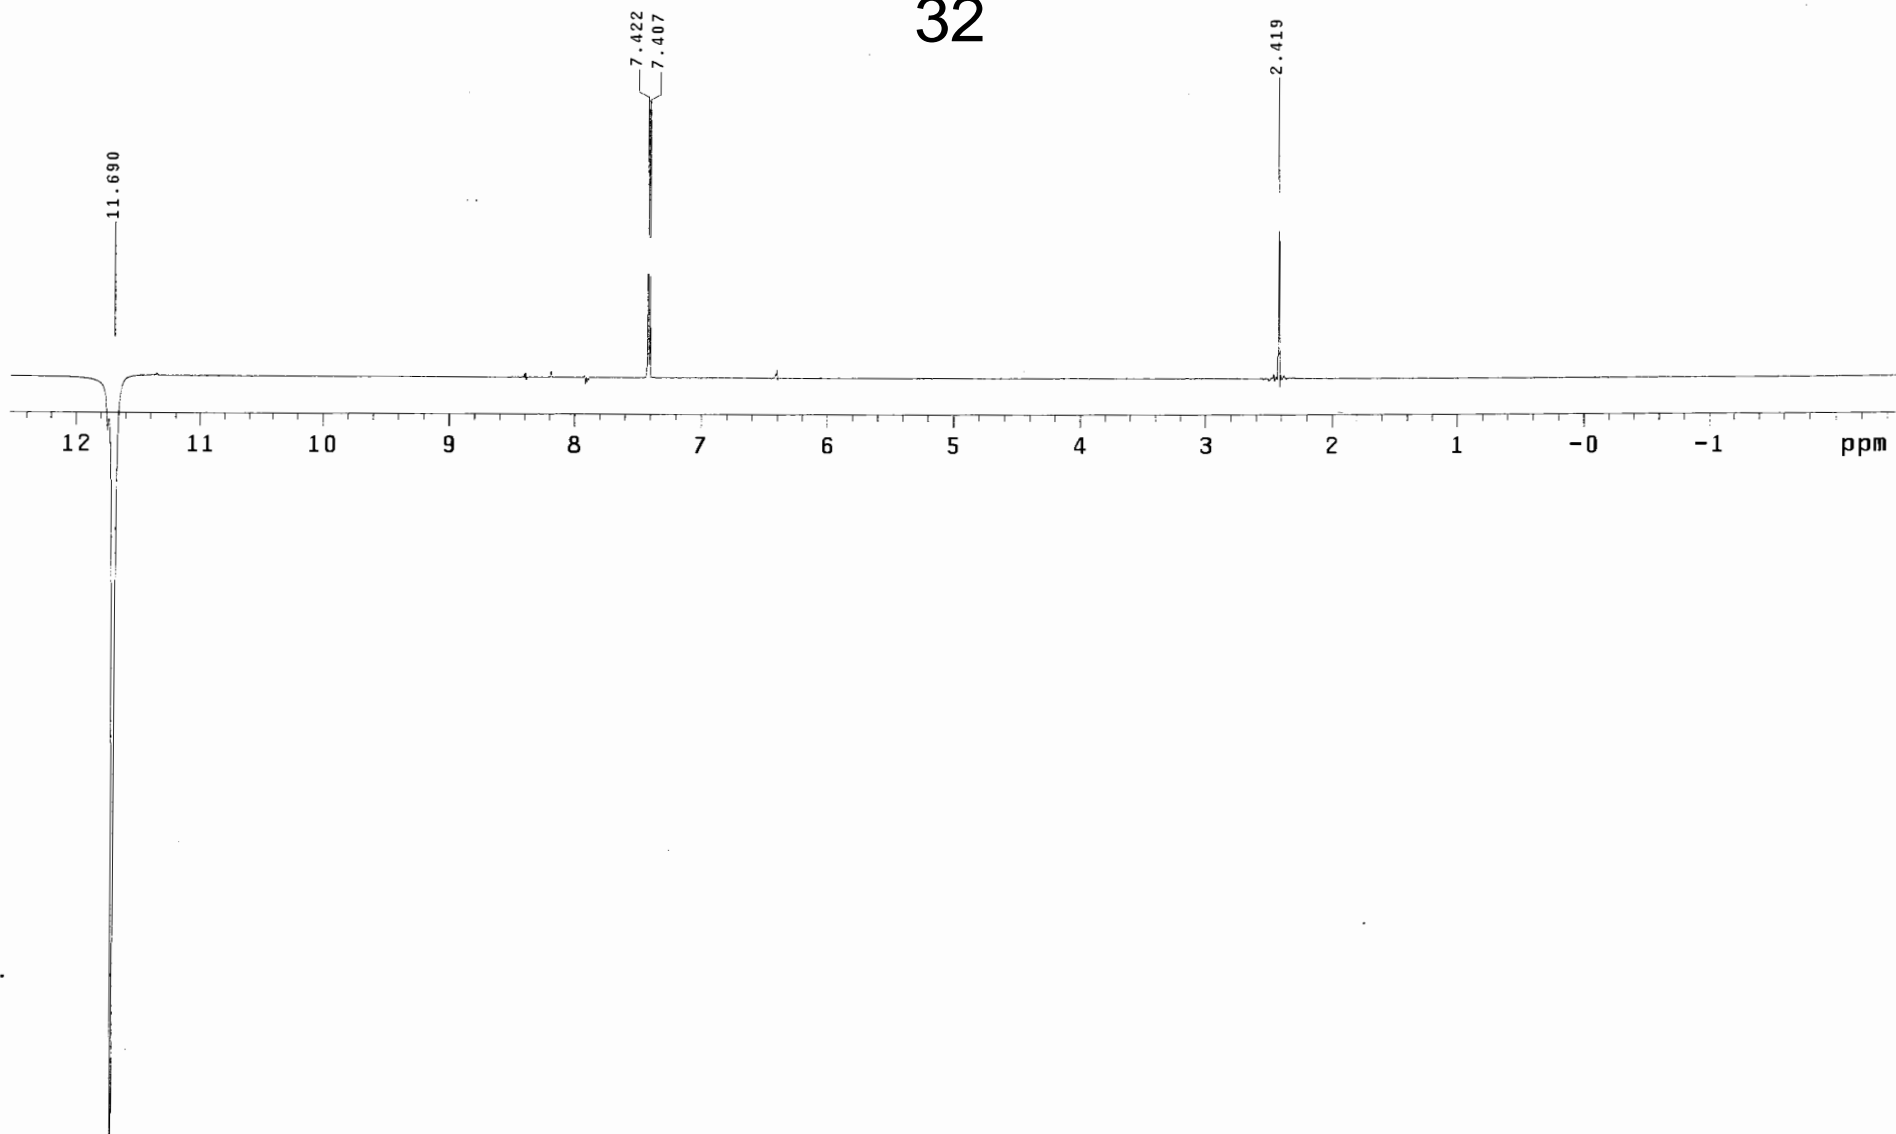

S84

STANDARD PROTON PARAMETERS

Mar 15 2011

Pulse Sequence: cyclenoe

Solvent: DMSO

Temp. 22.0 C / 295.1 K

INOVA-600 "inova600"

Relax. delay 1.000 sec

Pulse 90.0 degrees

Mixing 0.000 sec

Acq. time 3.000 sec

Width 9000.9 Hz

32 repetitions

OBSERVE H1, 599.8751438 MHz

DATA PROCESSING

Line broadening 0.4 Hz

FT size 131072

Total time 4 min, 16 sec

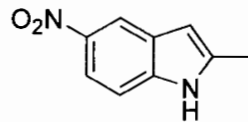

32

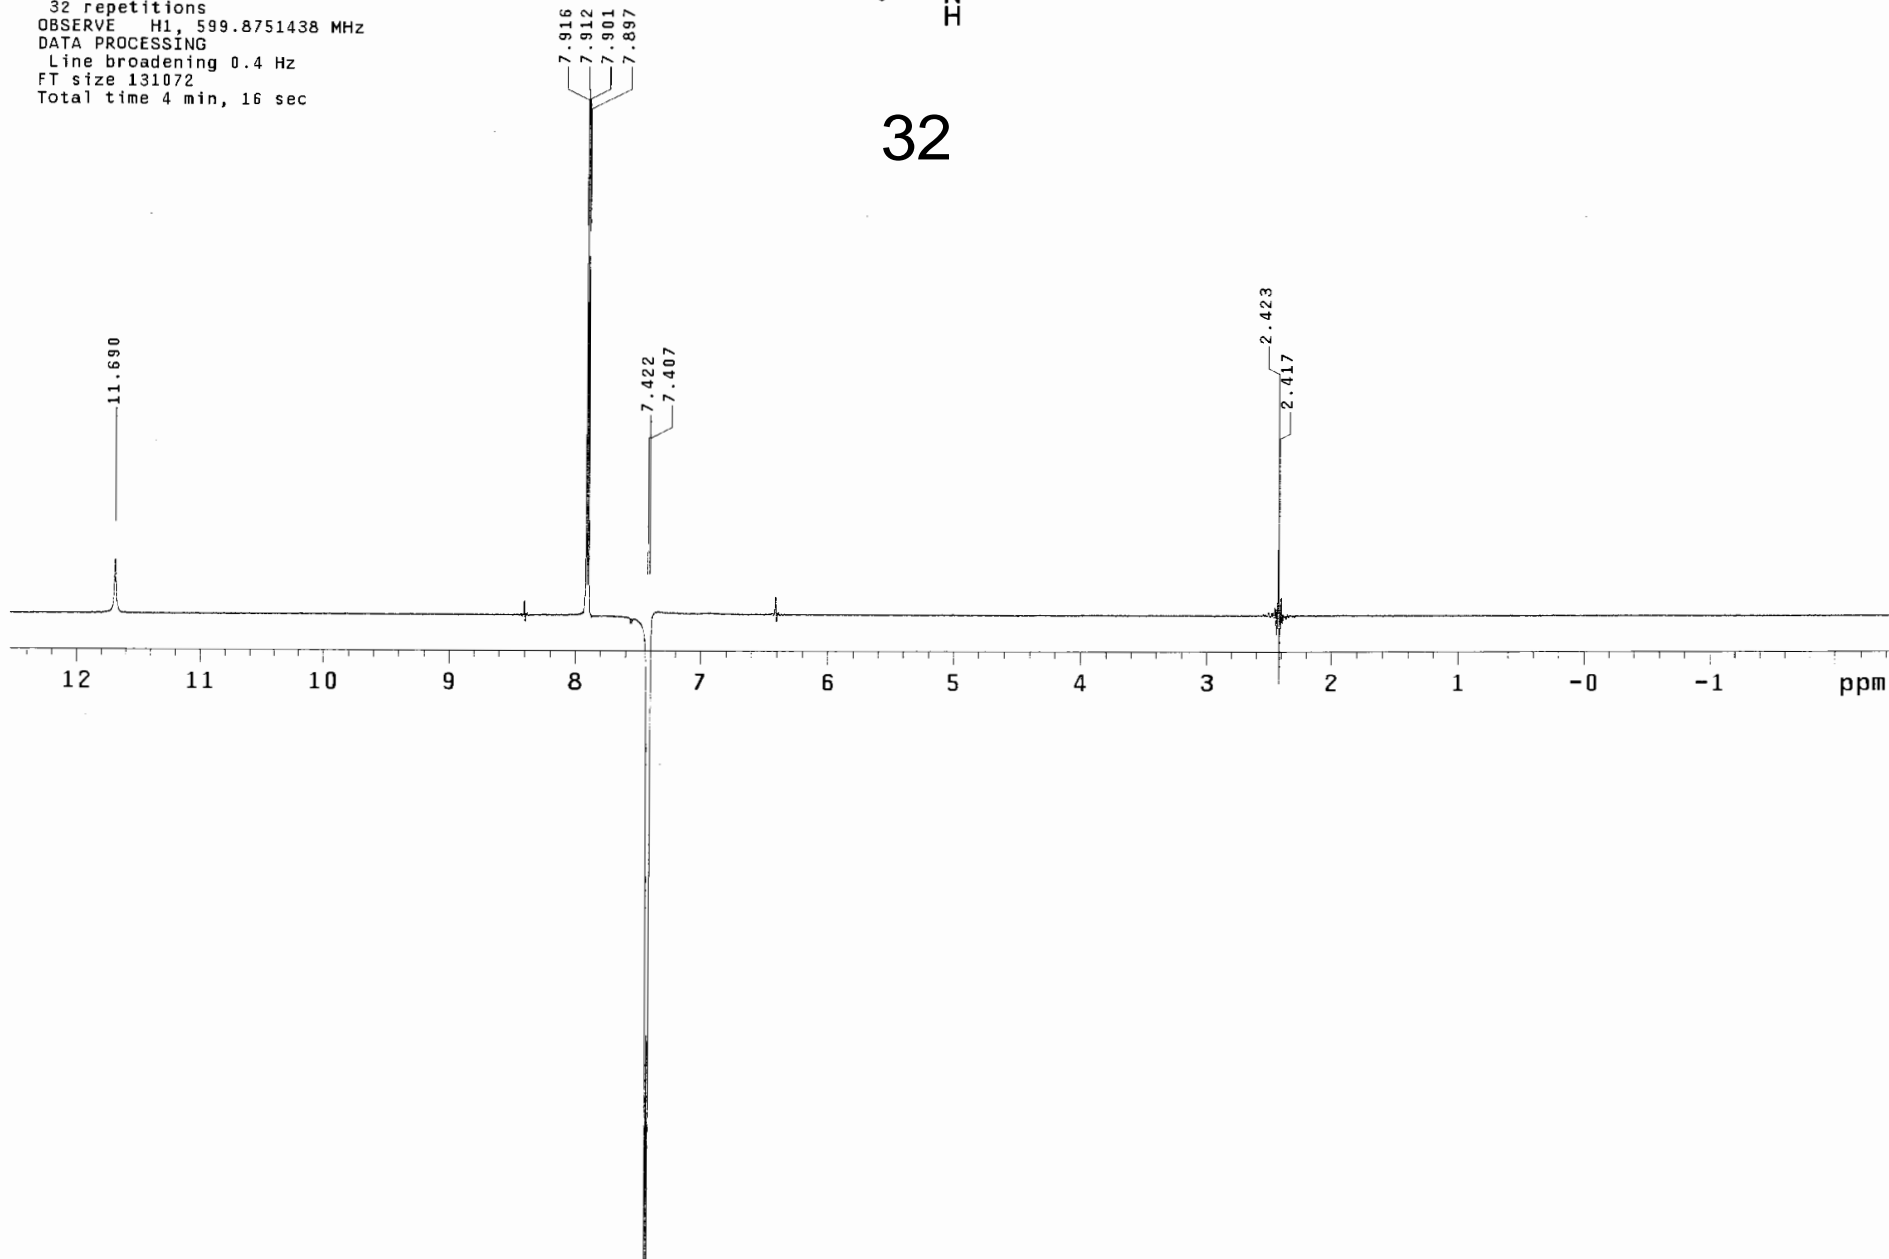

S85  
STANDARD PROTON PARAMETERS

Pulse Sequence: s2pul

Solvent: DMSO  
Ambient temperature  
INOVA-600 "inova600"

Relax. delay 1.000 sec  
Pulse 31.8 degrees  
Acq. time 3.000 sec  
Width 9000.9 Hz  
16 repetitions  
OBSERVE H1, 599.8751436 MHz  
DATA PROCESSING  
Line broadening 0.4 Hz  
FT size 131072  
Total time 1 min, 4 sec

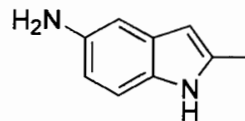

33

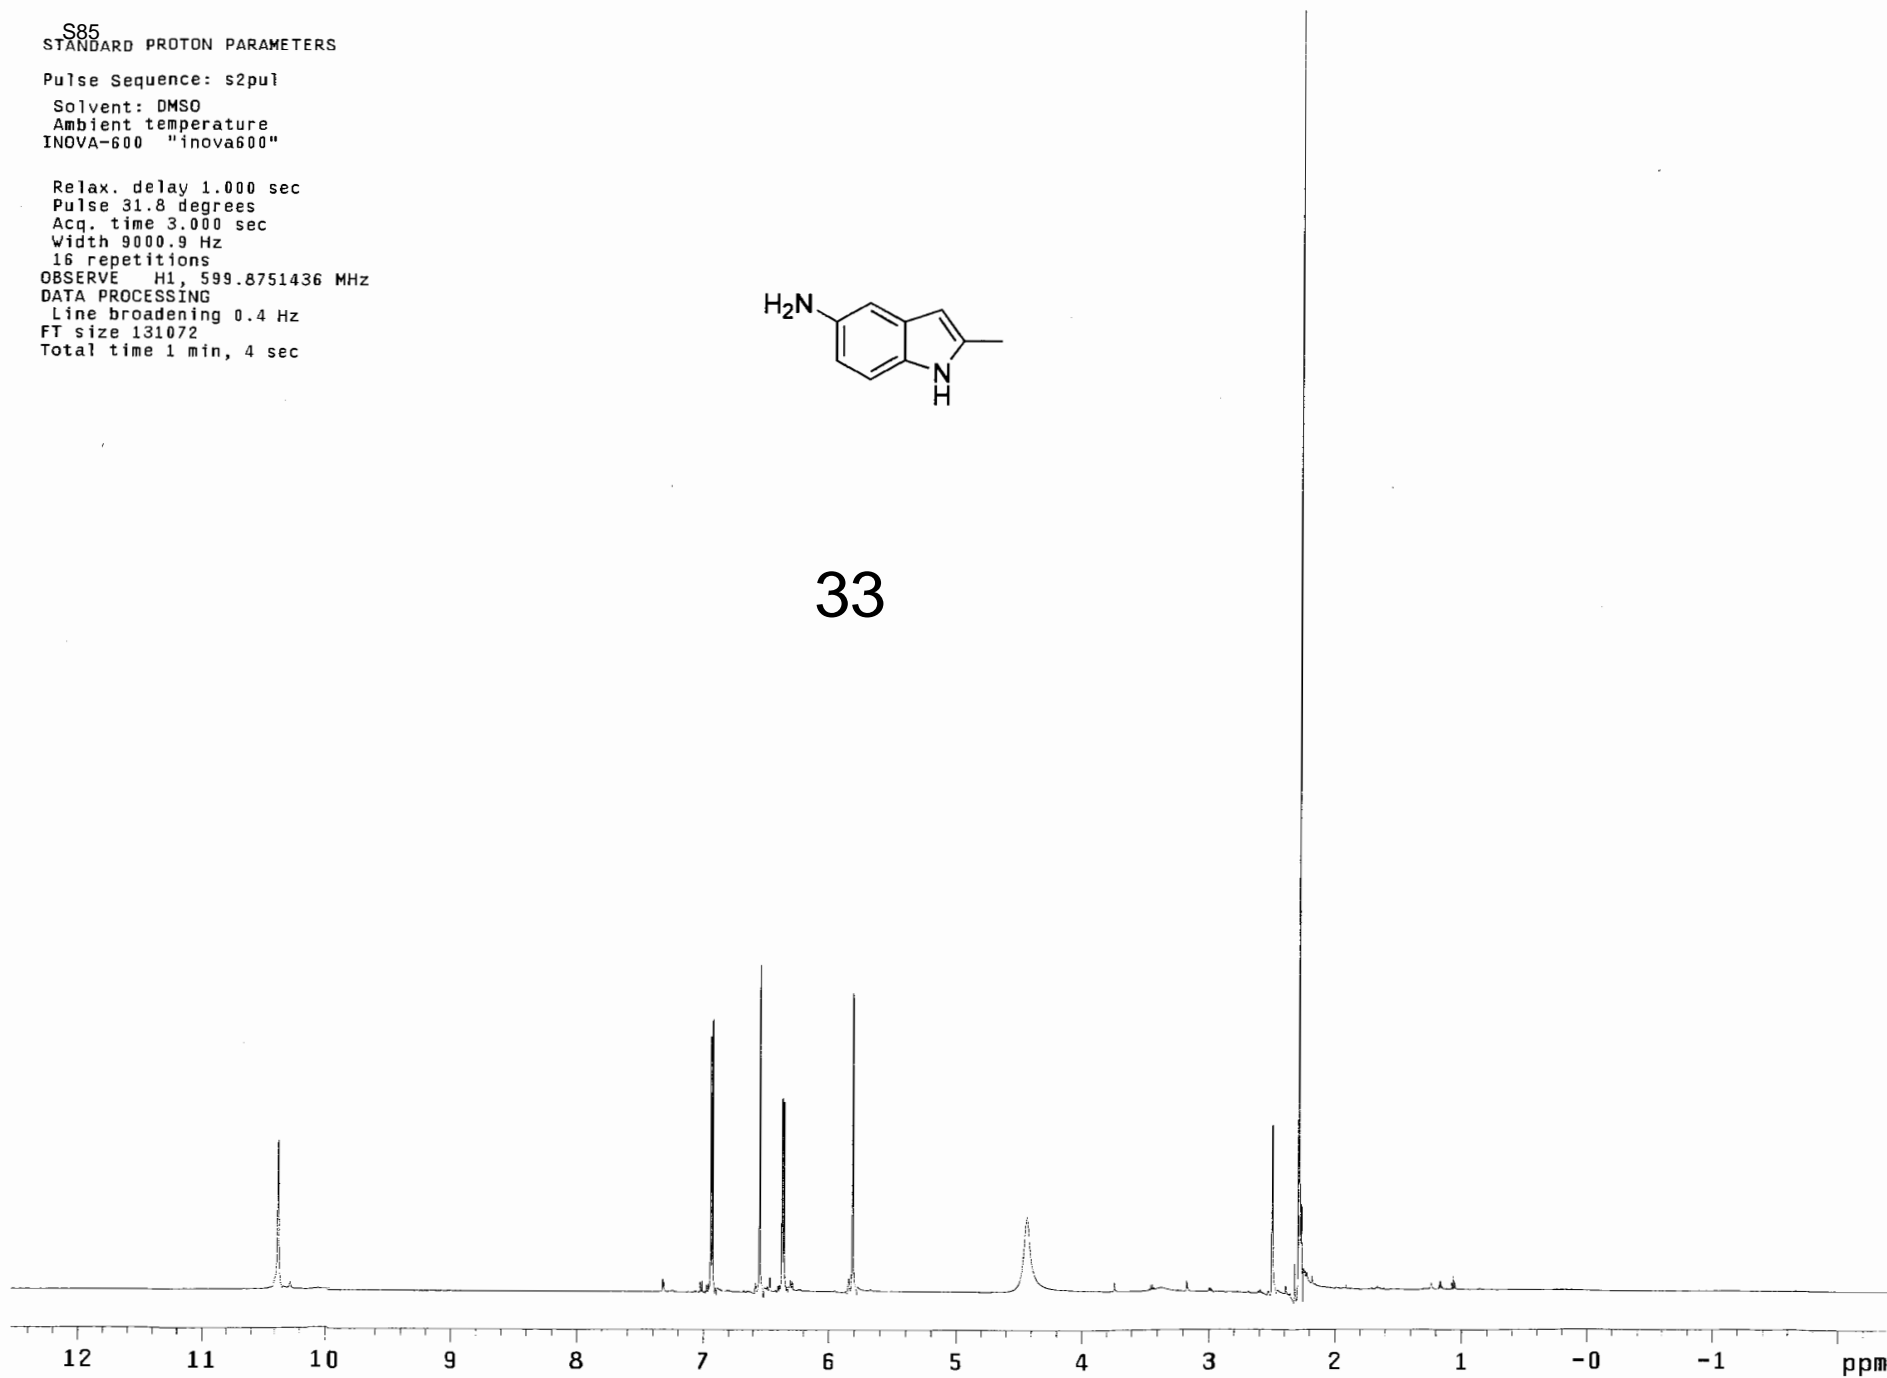

S86  
STANDARD CARBON PARAMETERS

Pulse Sequence: s2pu1

Solvent: DMSO

Ambient temperature

User: 1-14-87

INOVA-600 "inova600"

Pulse 46.4 degrees

Acq. time 1.000 sec

Width 37735.8 Hz

992 repetitions

OBSERVE C13, 150.8387892 MHz

DECOUPLE H1, 599.8781638 MHz

Power 32 dB

continuously on

WALTZ-16 modulated

DATA PROCESSING

Gauss window 0.600 sec

center at 0.100 sec

FT size 524288

Total time 2 hr, 48 min, 9 sec

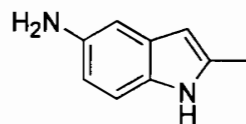

33

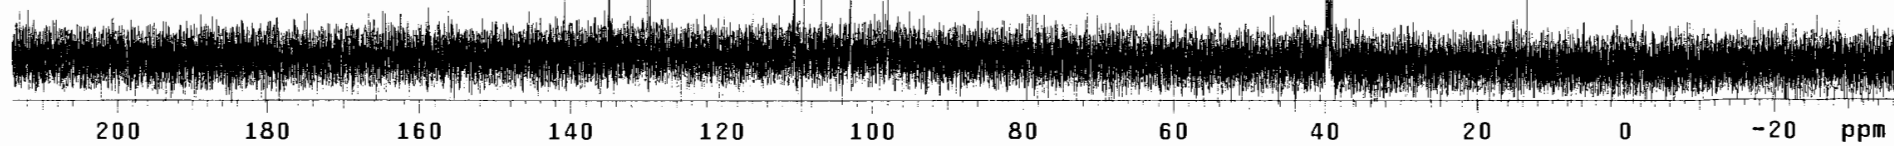

S87

STANDARD PROTON PARAMETERS

Pulse Sequence: gcosy

Solvent: DMSO

Ambient temperature

INOVA-600 "inova600"

Relax. delay 1.000 sec

Acq. time 0.175 sec

Width 1466.9 Hz

2D Width 1466.9 Hz

Single scan

61 increments

OBSERVE H1, 599.8751436 MHz

DATA PROCESSING

Sine bell 0.087 sec

F1 DATA PROCESSING

Sine bell 0.021 sec

FT size 512 x 512

Total time 1 min, 16 sec

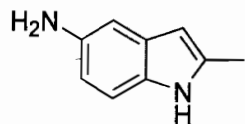

33

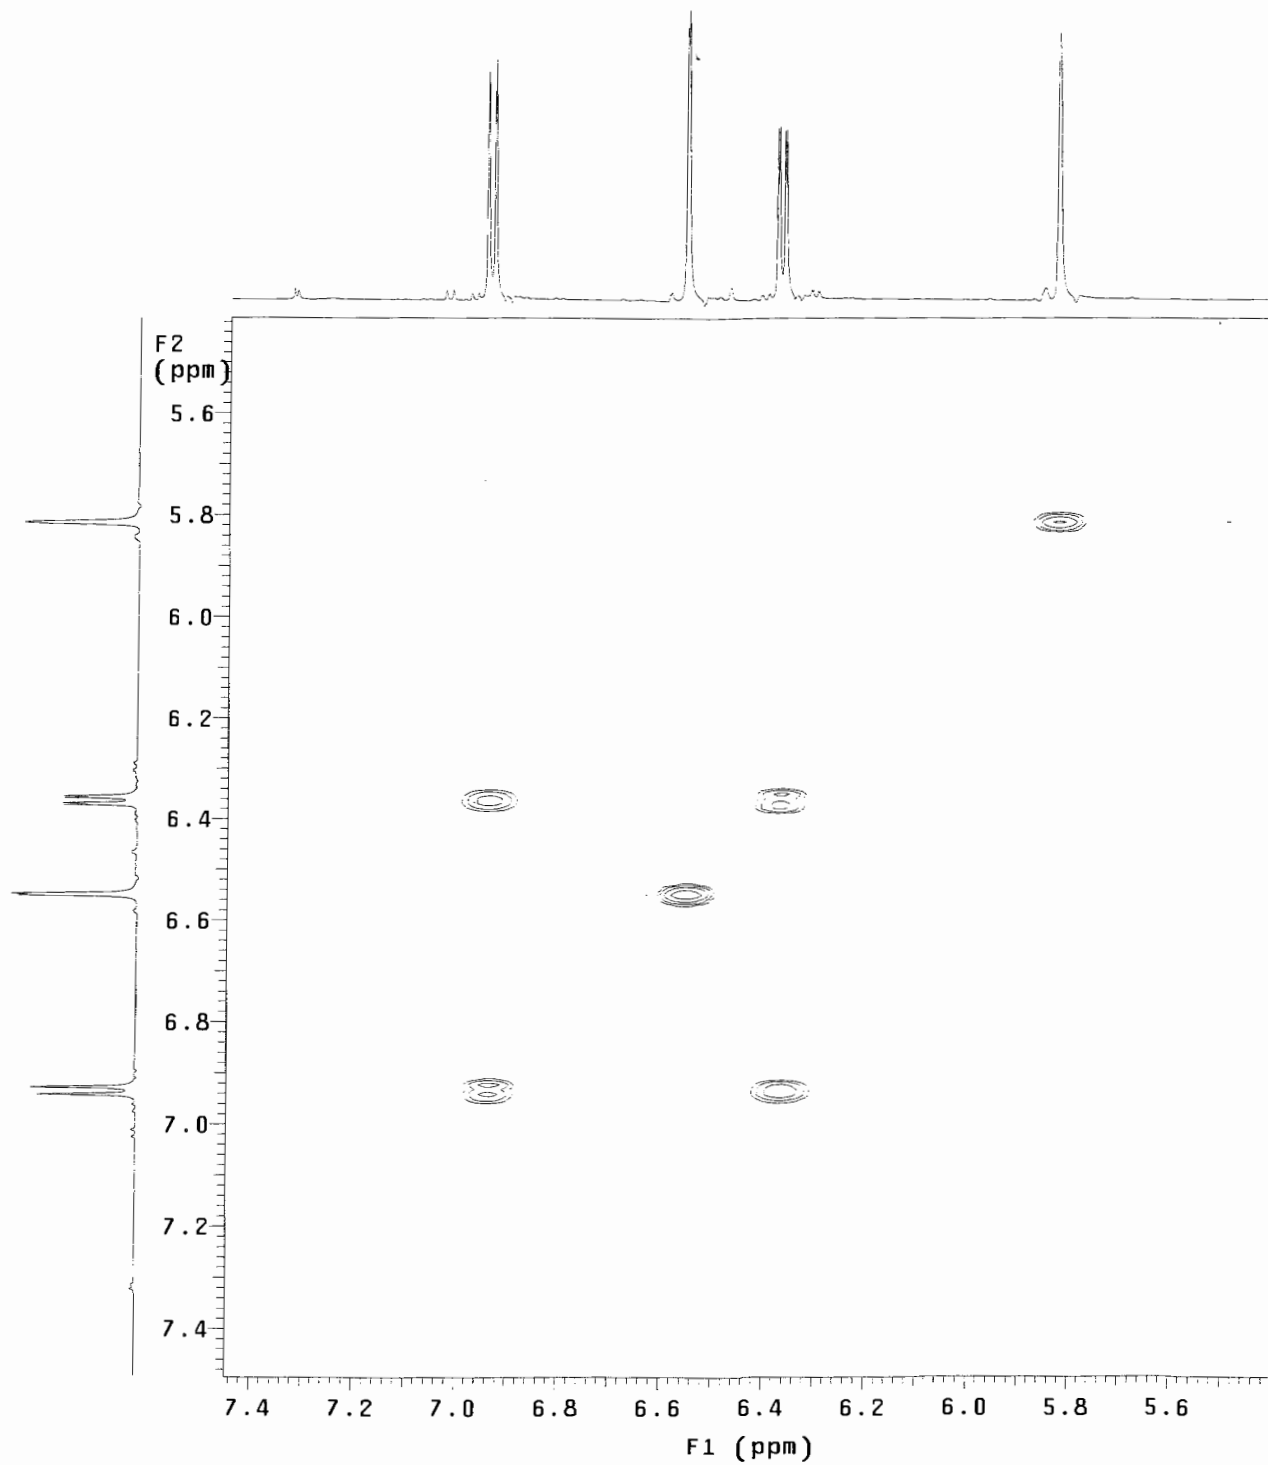

S88

STANDARD PROTON PARAMETERS

Pulse Sequence: s2pu1

Solvent: DMSO

Temp. 25.0 C / 298.1 K

INOVA-600 "inova600"

Relax. delay 1.000 sec

Pulse 31.8 degrees

Acq. time 3.000 sec

Width 9000.9 Hz

16 repetitions

OBSERVE H1, 599.8751436 MHz

DATA PROCESSING

Line broadening 0.4 Hz

FT size 131072

Total time 1 min, 4 sec

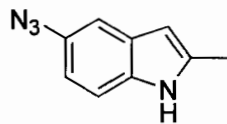

34

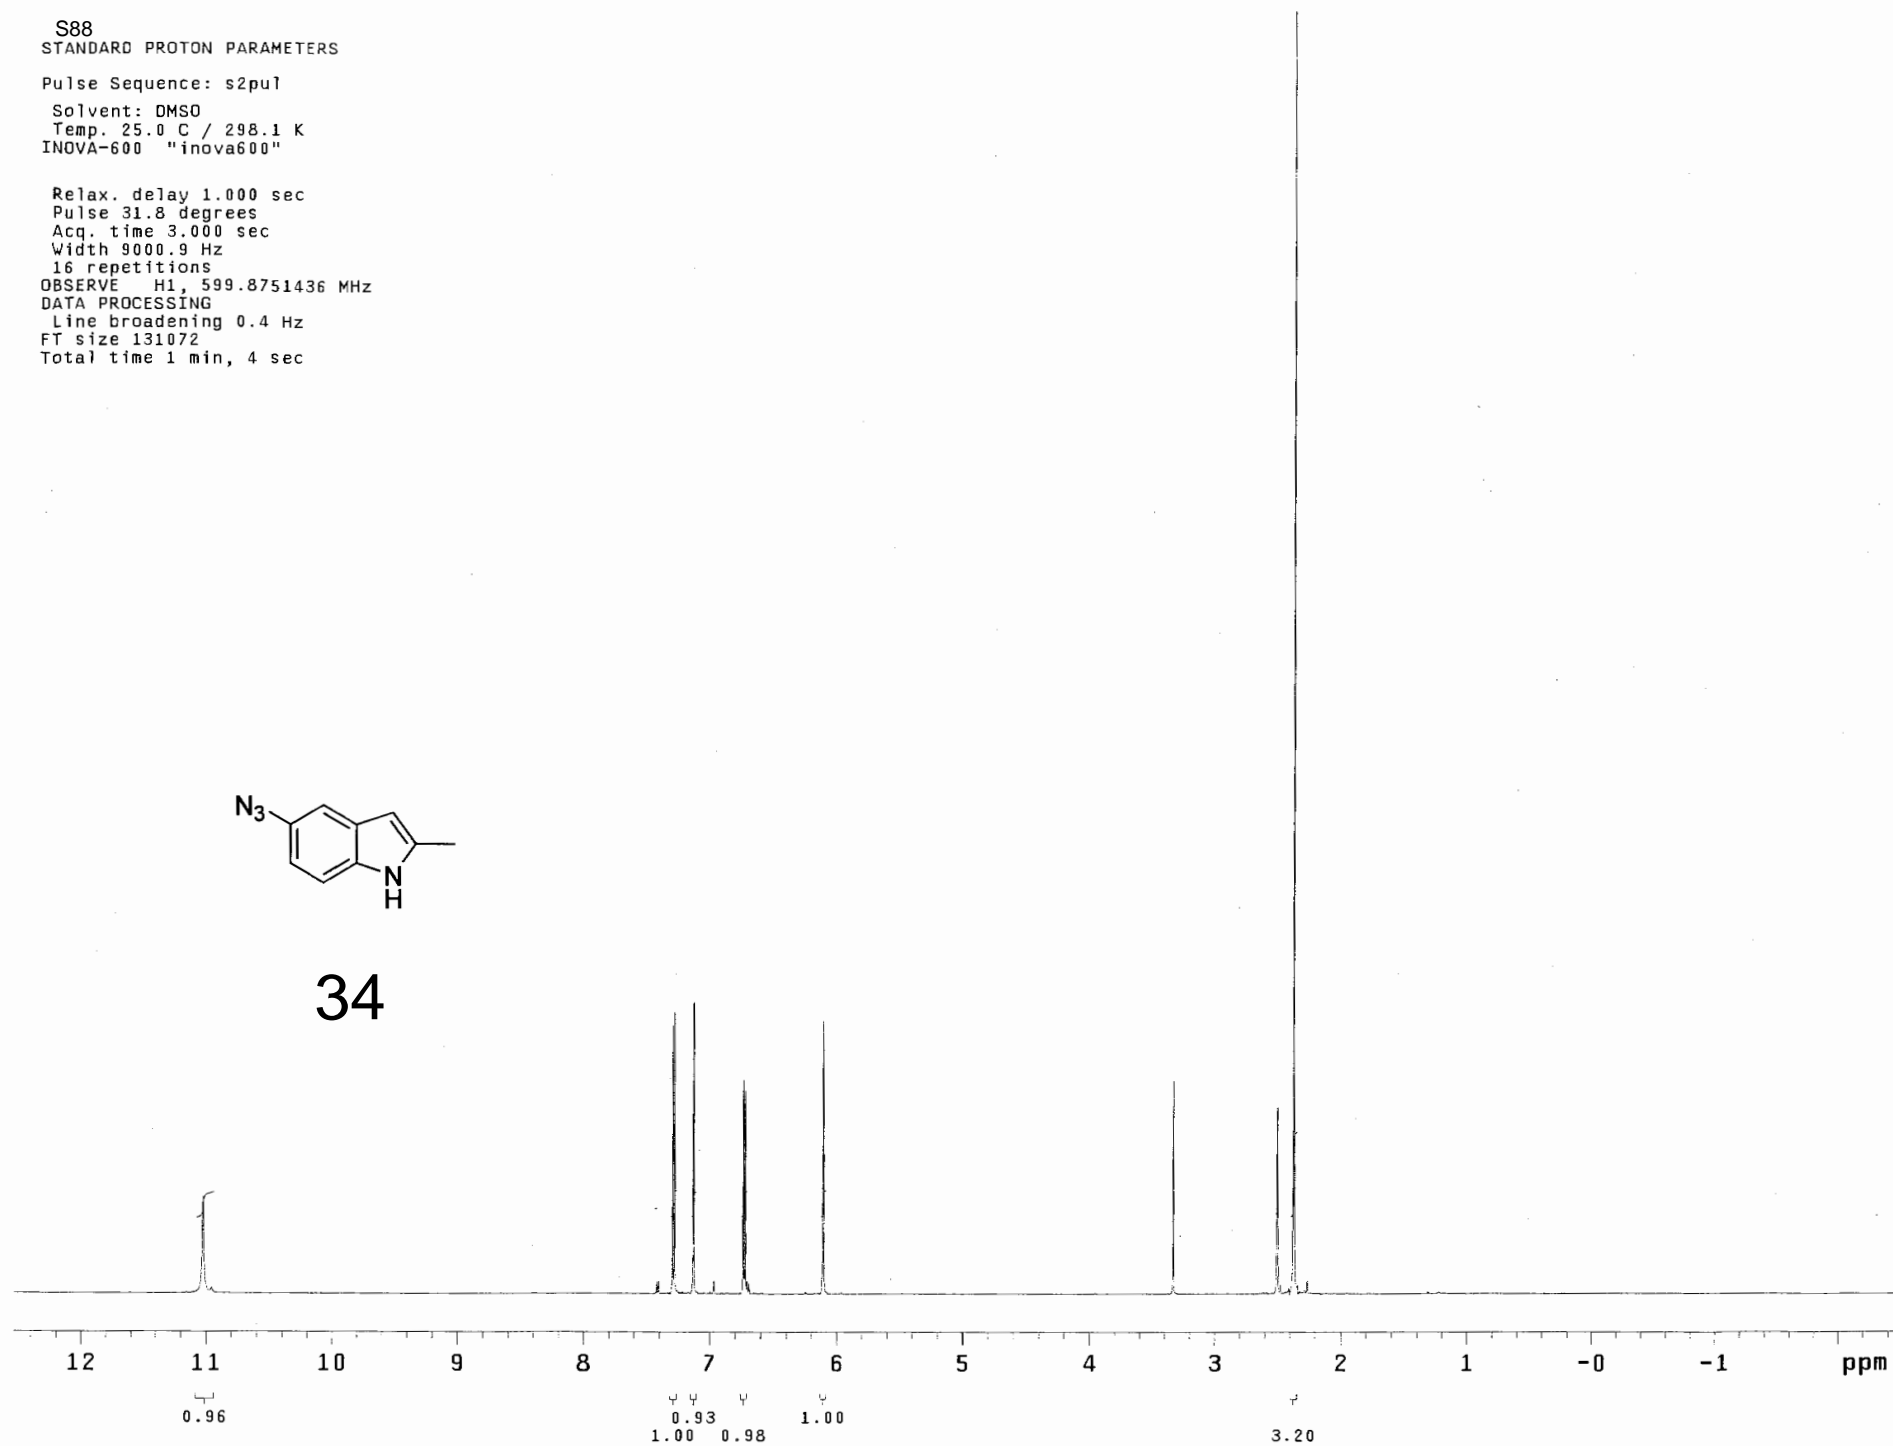



S89  
STANDARD CARBON PARAMETERS

Pulse Sequence: s2pul  
Solvent: DMSO  
Temp. 25.0 C / 298.1 K  
User: 1-14-87  
File: 2-87\_13c  
INOVA-600 "inova600"

Pulse 46.4 degrees  
Acq. time 1.000 sec  
Width 37735.8 Hz  
1824 repetitions  
OBSERVE C13, 150.8387995 MHz  
DECOUPLE H1, 599.8781638 MHz  
Power 32 dB  
continuously on  
WALTZ-16 modulated  
DATA PROCESSING  
Gauss window 0.600 sec  
center at 0.100 sec  
FT size 524288  
Total time 28 hr, 1 min, 31 sec

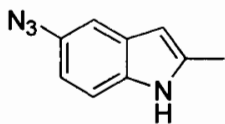

34

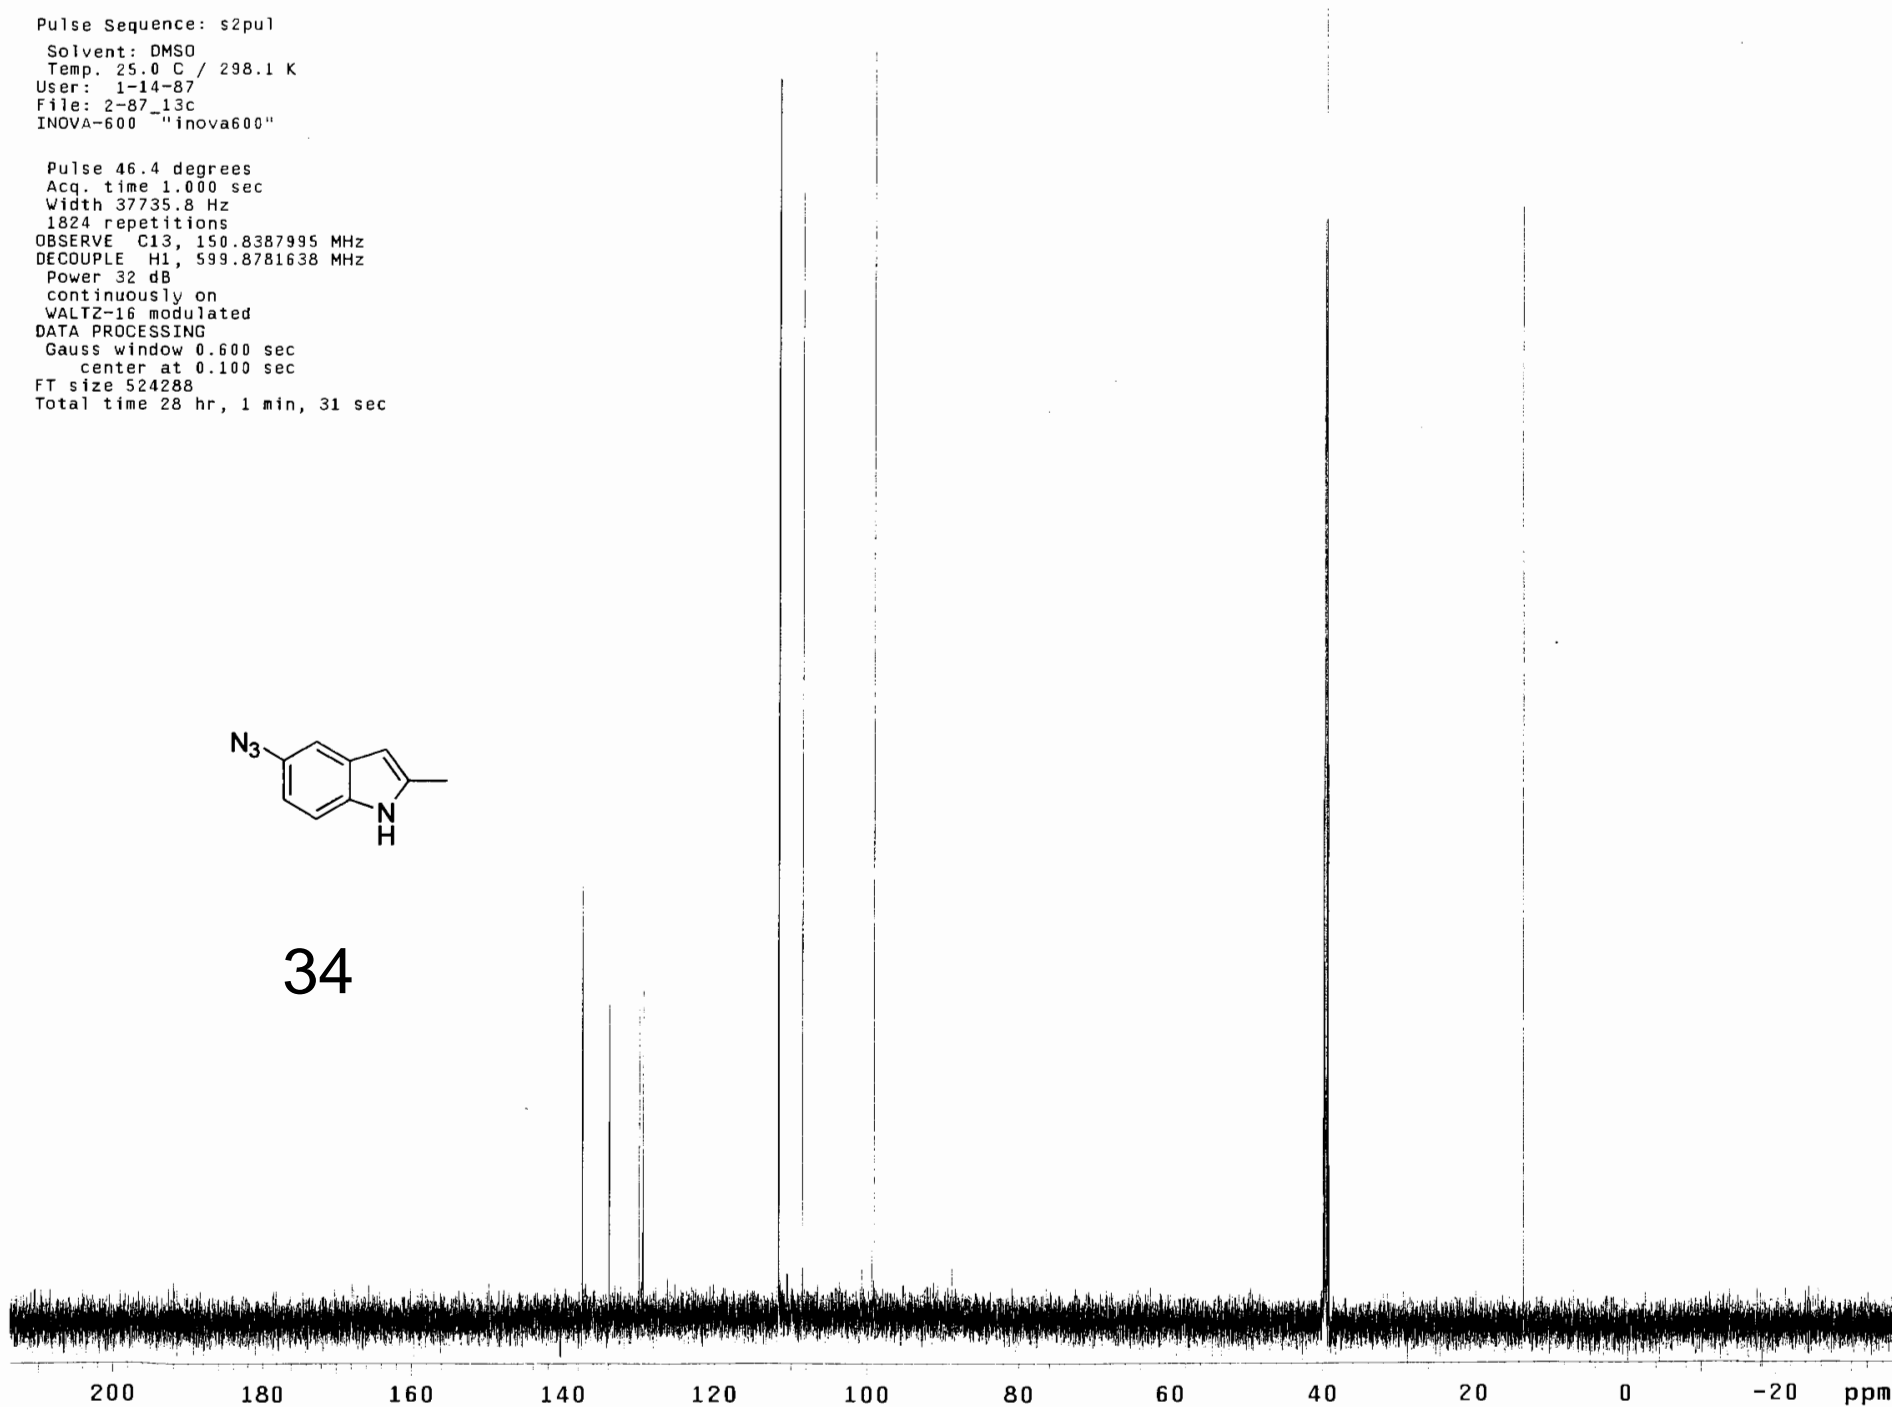

S90

STANDARD PROTON PARAMETERS

Pulse Sequence: gcosy

Solvent: DMSO  
Temp. 25.0 C / 298.1 K  
File: 2-87\_cosy  
INOVA-600 "inova600"

Relax. delay 1.000 sec  
Acq. time 0.140 sec  
Width 1832.5 Hz  
2D Width 1832.5 Hz  
Single scan  
76 increments  
OBSERVE H1, 599.8751436 MHz  
DATA PROCESSING  
Sine bell 0.070 sec  
F1 DATA PROCESSING  
Sine bell 0.021 sec  
FT size 512 x 512  
Total time 1 min, 31 sec

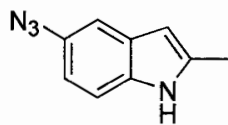

34

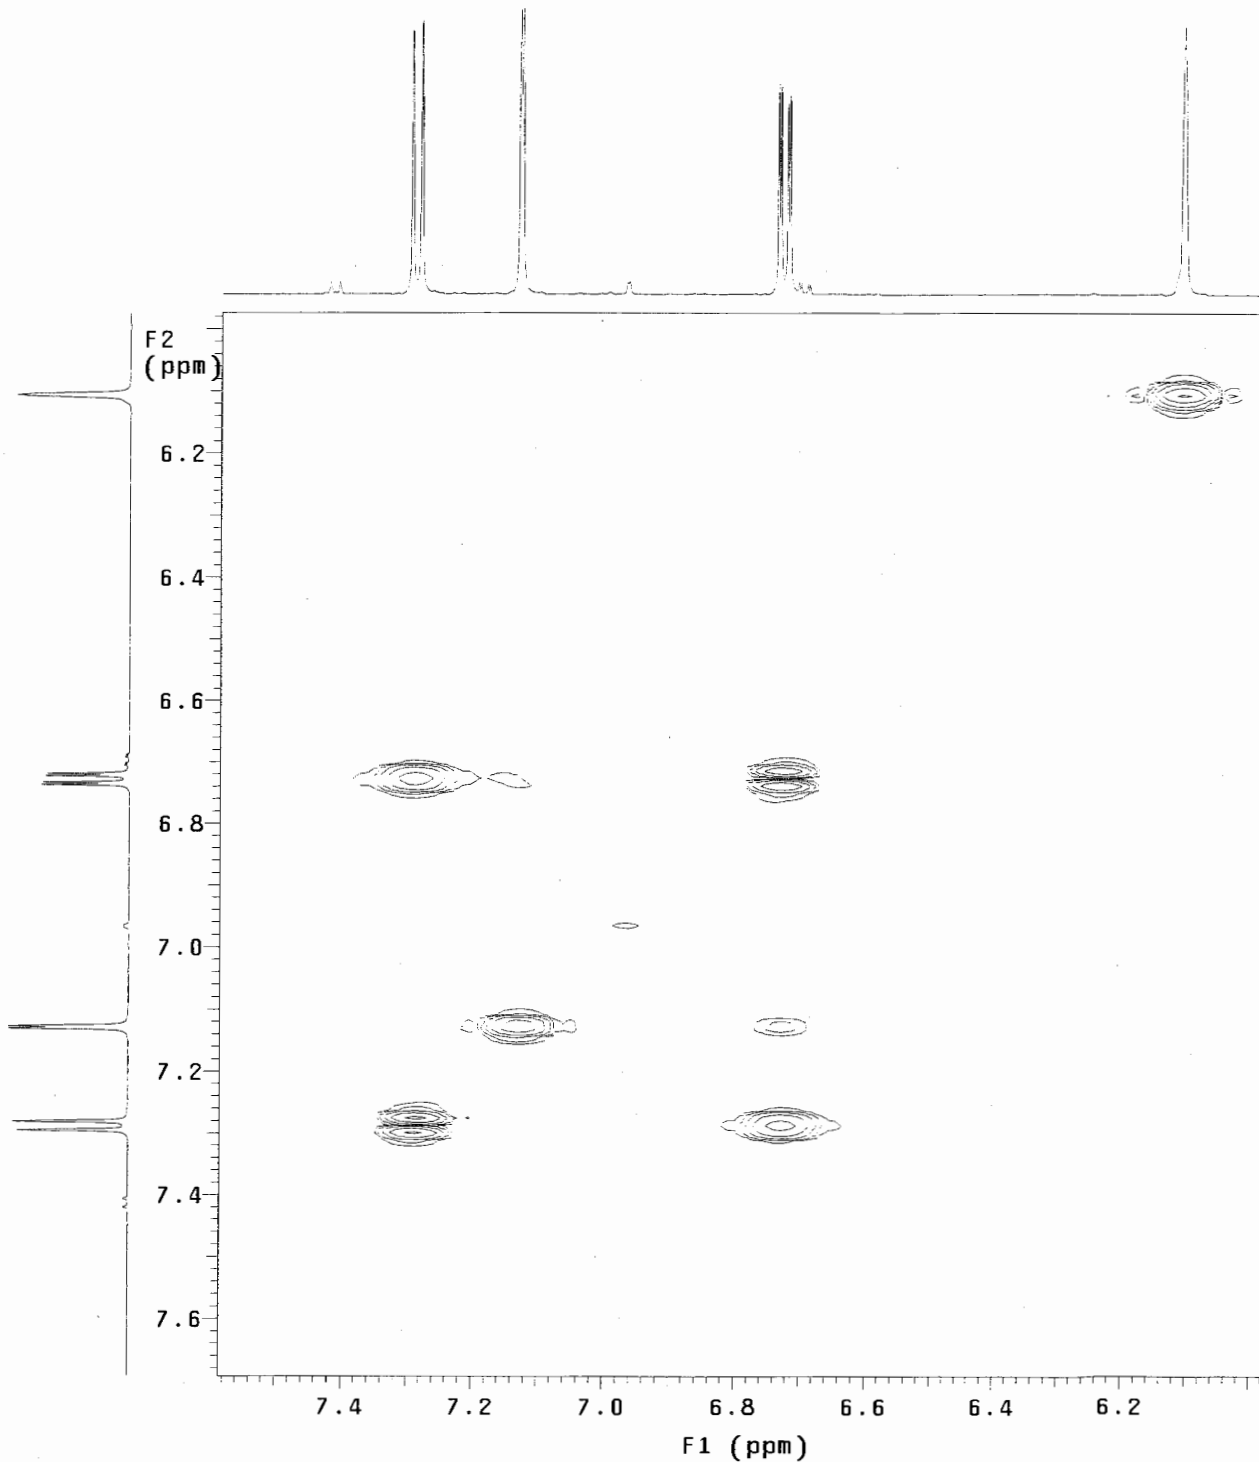

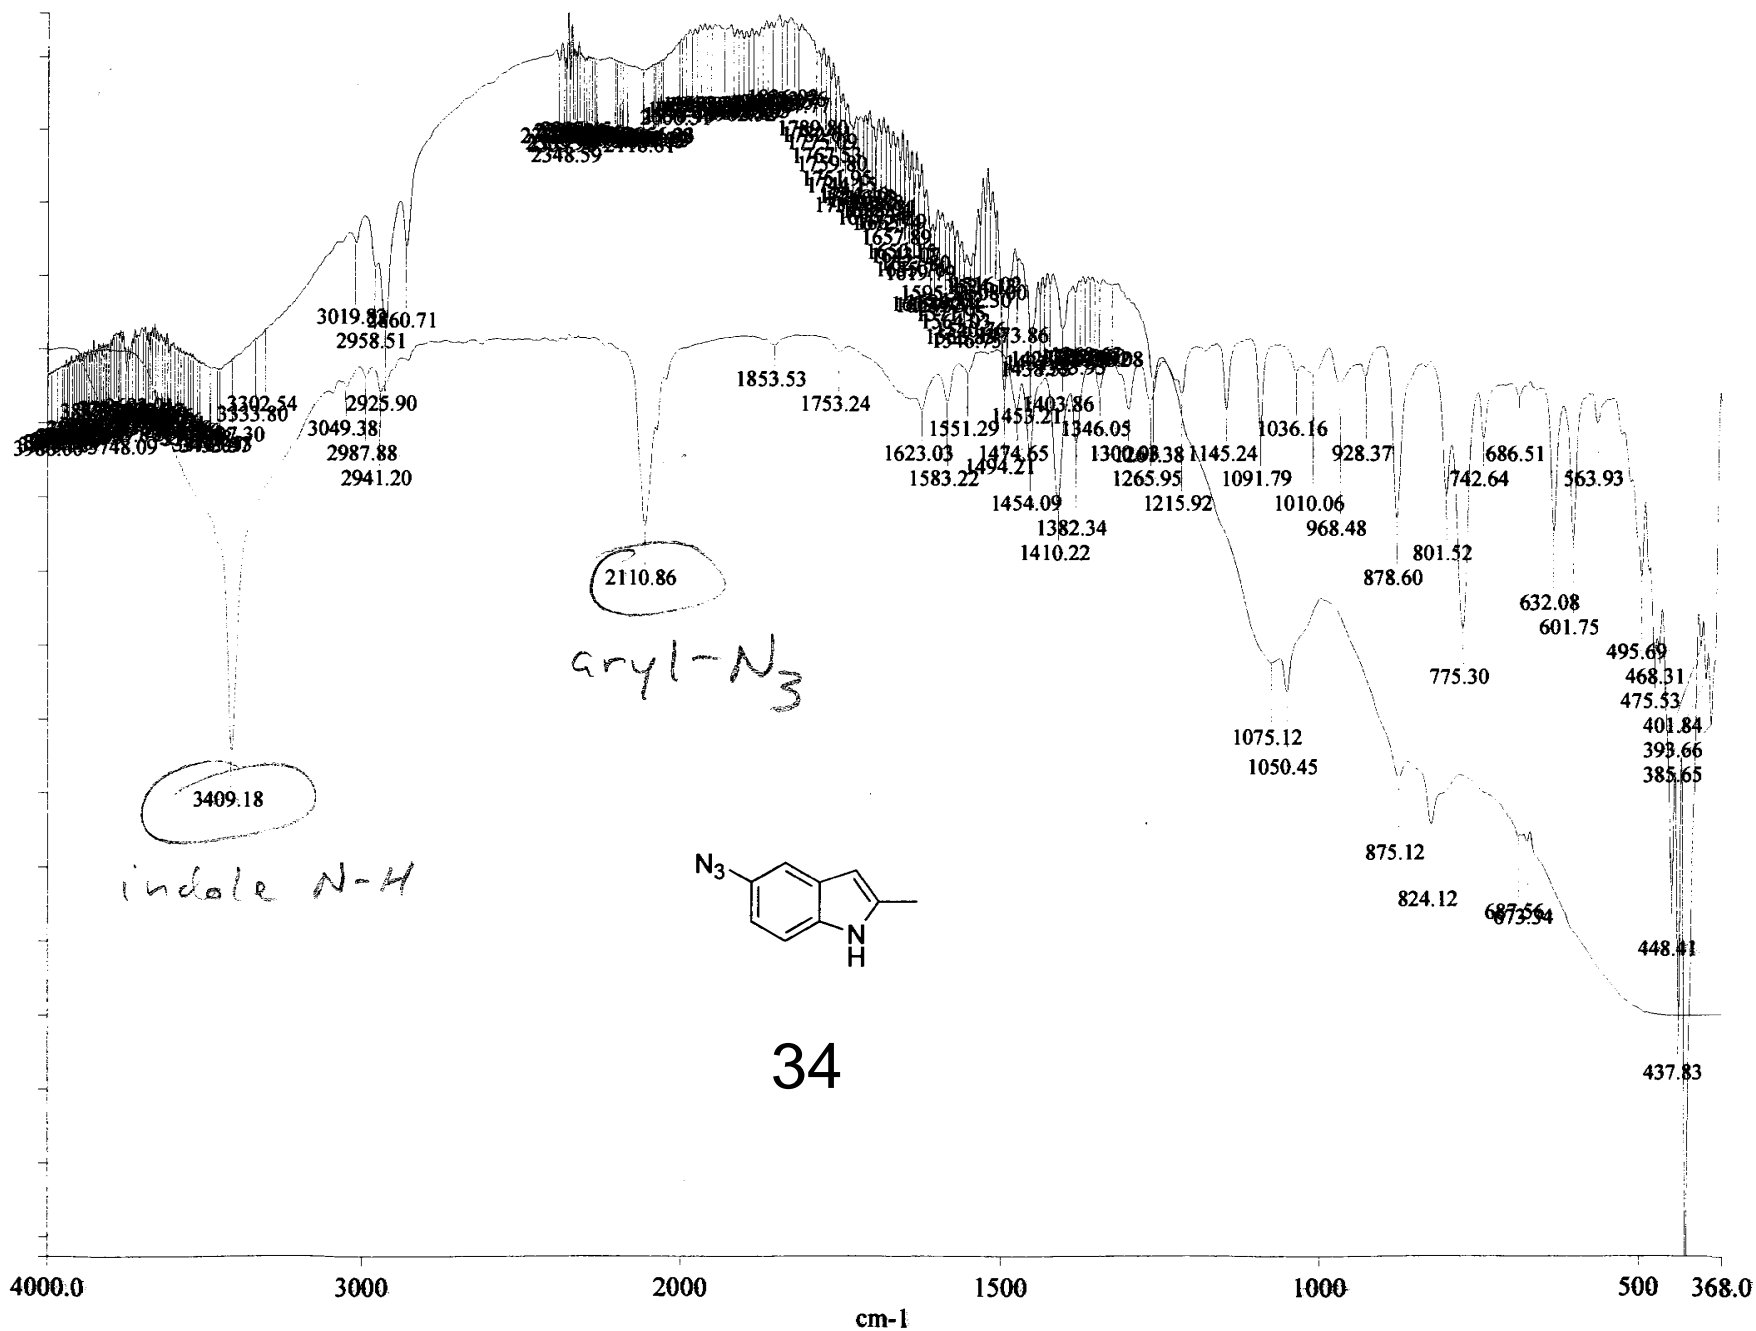

c:\pel\_data\spectra\m robinson\2-27b.sp - 2-27b  
 c:\pel\_data\spectra\2-77.sp - 2-77

S92  
STANDARD PROTON PARAMETERS

Pulse Sequence: s2pu1  
Solvent: DMSO  
Temp. 24.0 C / 297.1 K  
INOVA-600 "inova600"

Relax. delay 1.000 sec  
Pulse 31.8 degrees  
Acq. time 3.000 sec  
Width 9000.9 Hz  
16 repetitions  
OBSERVE H1, 599.8751437 MHz  
DATA PROCESSING  
Line broadening 0.4 Hz  
FT size 131072  
Total time 1 min, 4 sec

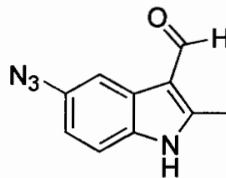

35

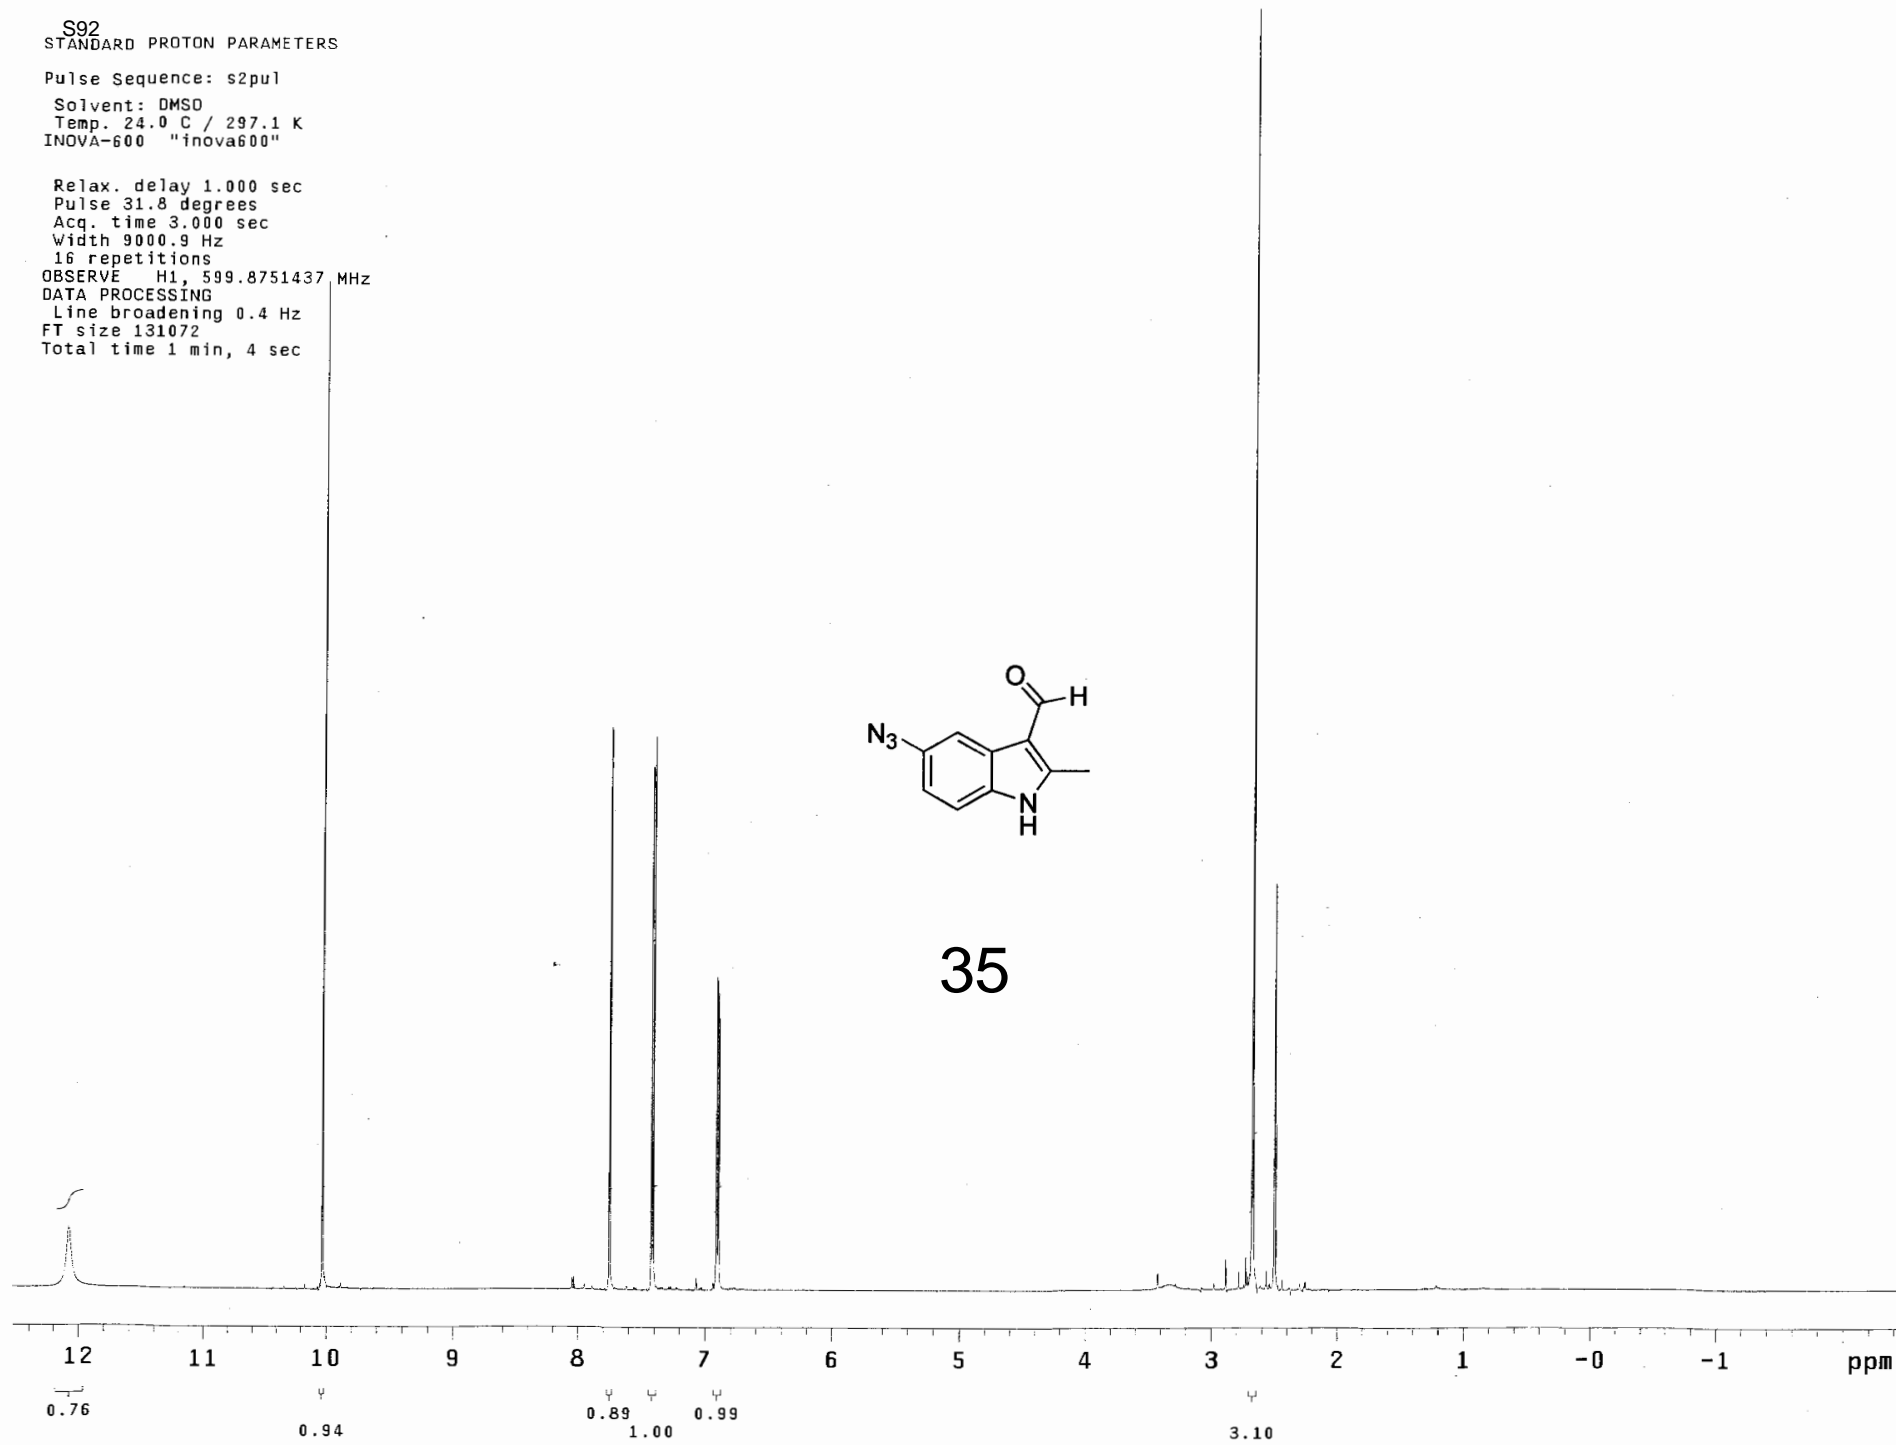

S93  
STANDARD CARBON PARAMETERS

Pulse Sequence: s2pul

Solvent: DMSO  
Temp. 24.0 C / 297.1 K  
User: 1-14-87  
File: 2-89\_c13  
INOVA-600 "inova600"

Pulse 46.4 degrees  
Acq. time 1.000 sec  
Width 37735.8 Hz  
2752 repetitions  
OBSERVE C13, 150,8387985 MHz  
DECOUPLE H1, 599,8781638 MHz  
Power 32 dB  
continuously on  
WALTZ-16 modulated  
DATA PROCESSING  
Gauss window 0.600 sec  
center at 0.100 sec  
FT size 524288  
Total time 2 hr, 48 min, 9 sec

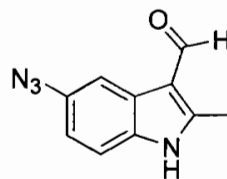

35

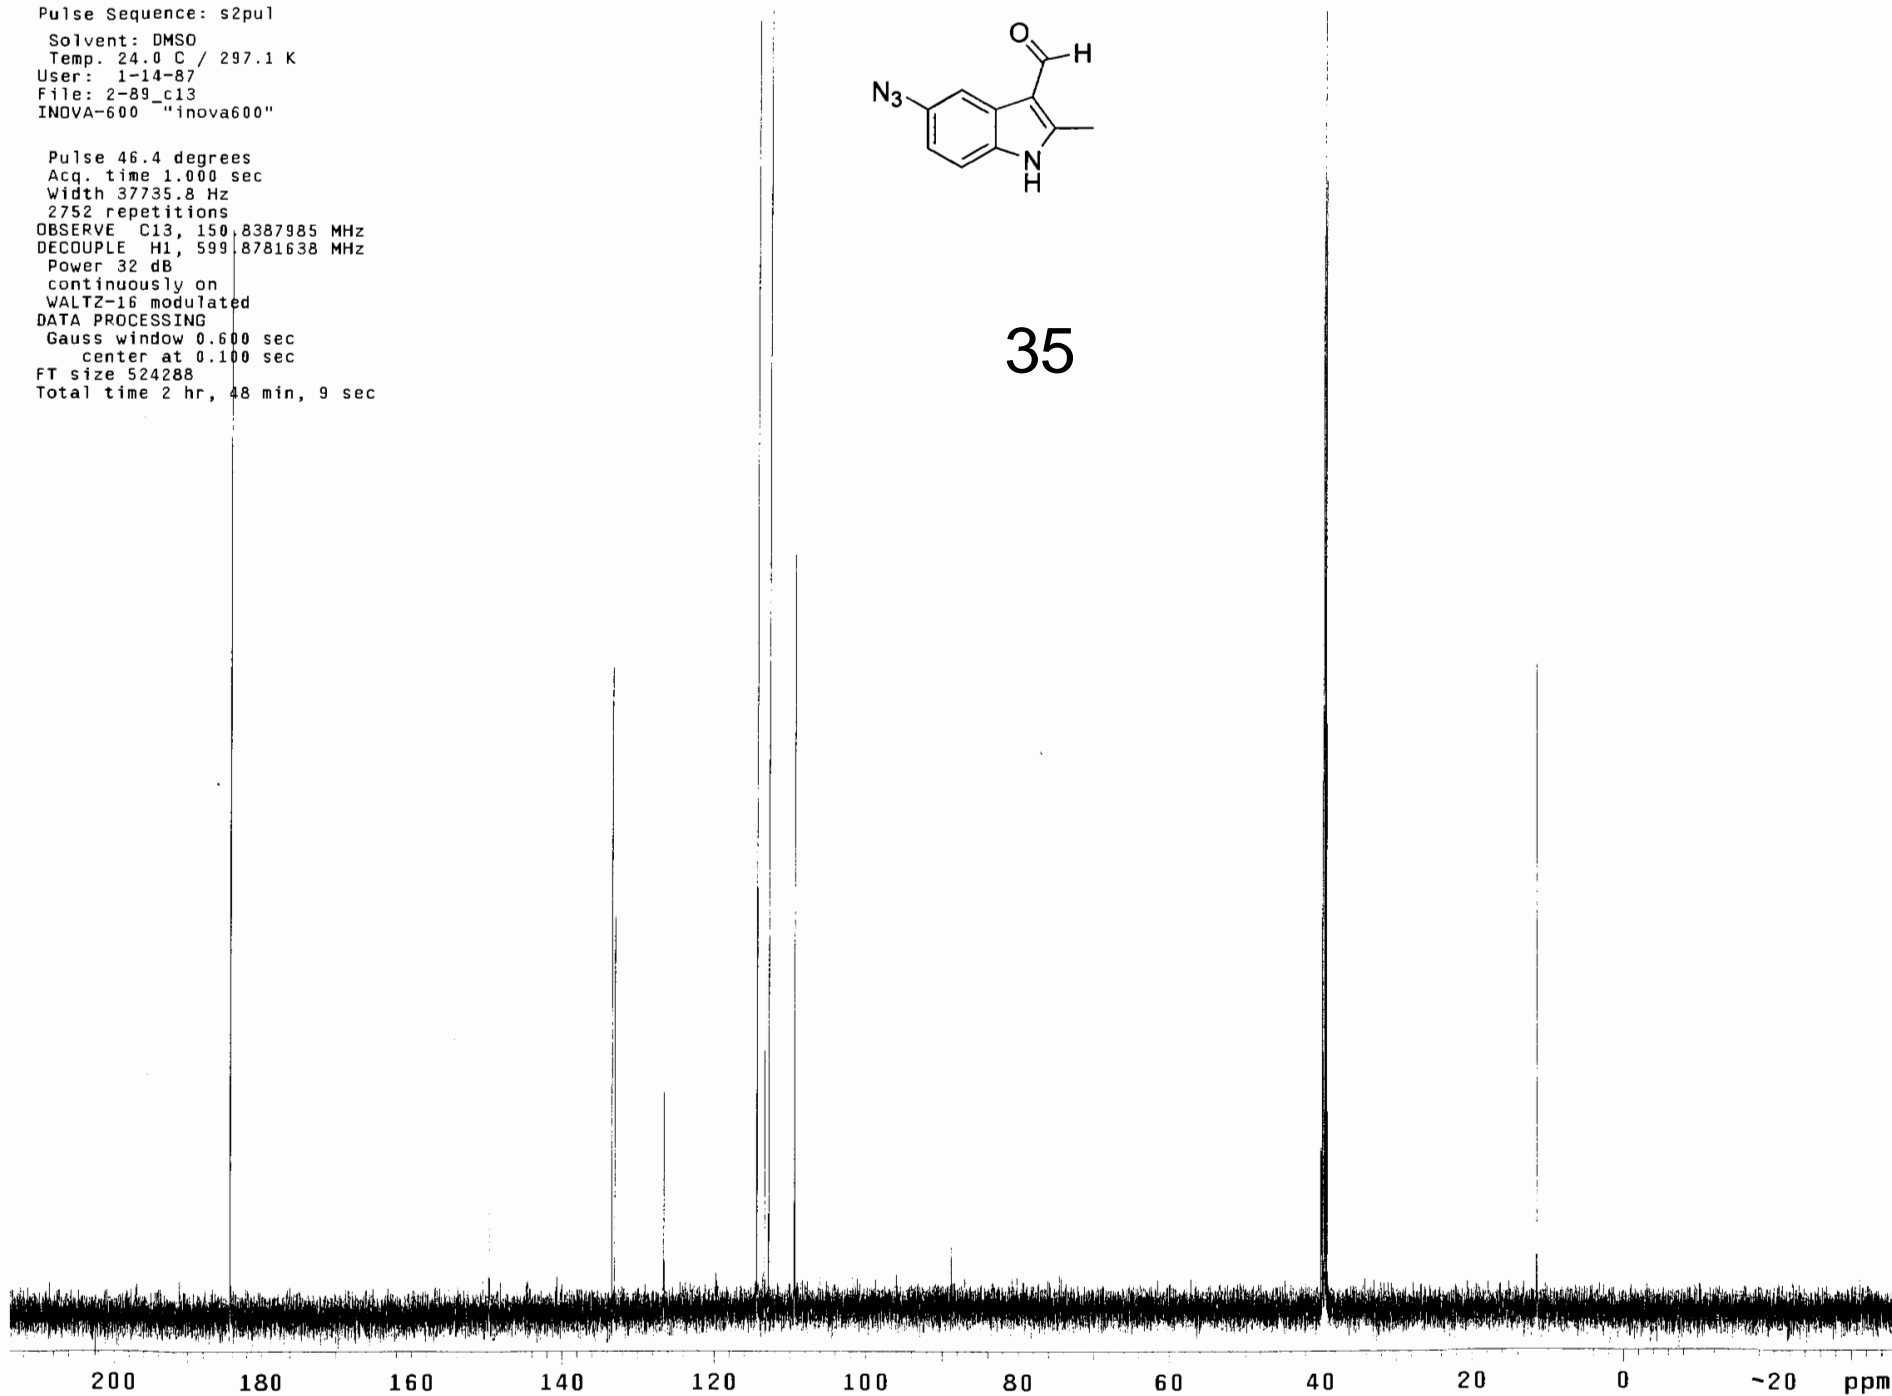

200 180 160 140 120 100 80 60 40 20 0 ~20 ppm

S94

STANDARD PROTON PARAMETERS

Pulse Sequence: gcosy

Solvent: DMSO

Temp. 24.0 C / 297.1 K

INOVA-600 "inova600"

Relax. delay 1.000 sec

Acq. time 0.168 sec

Width 3040.0 Hz

2D Width 3040.0 Hz

Single scan

126 increments

OBSERVE H1, 599.8751437 MHz

DATA PROCESSING

Sine bell 0.084 sec

F1 DATA PROCESSING

Sine bell 0.021 sec

FT size 1024 x 1024

Total time 2 min, 33 sec

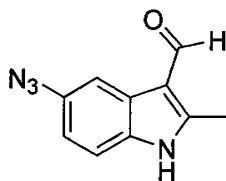

35

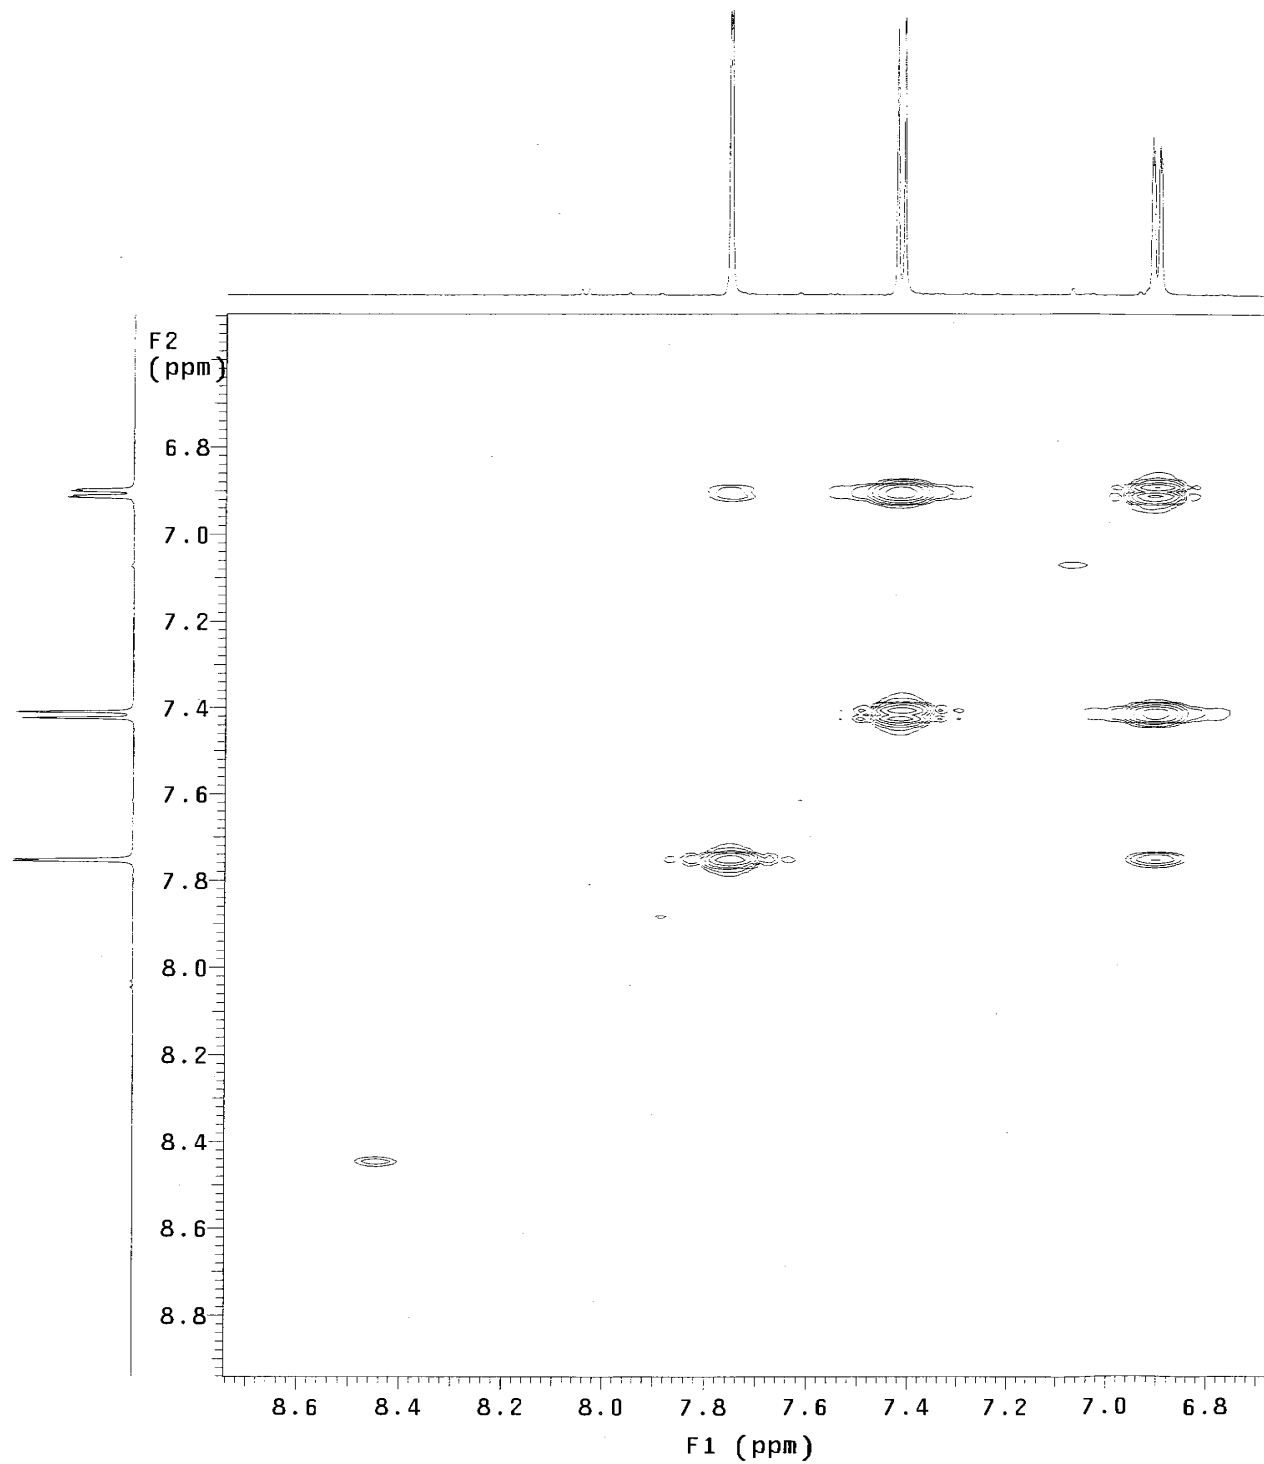

S95

STANDARD PROTON PARAMETERS

Pulse Sequence: s2pu1

Solvent: DMSO

Ambient temperature

File: 2-85\_hi\_dms0

INOVA-600 "inova-wkst"

Relax. delay 1.000 sec

Pulse 31.8 degrees

Acq. time 3.000 sec

Width 8999.9 Hz

16 repetitions

OBSERVE H1, 599.8751432 MHz

DATA PROCESSING

Line broadening 0.4 Hz

FT size 131072

Total time 1 min, 4 sec

Mar 4 2011

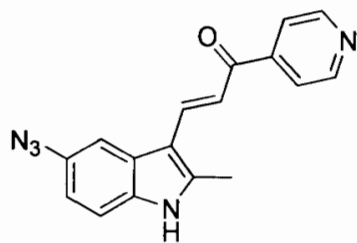

36

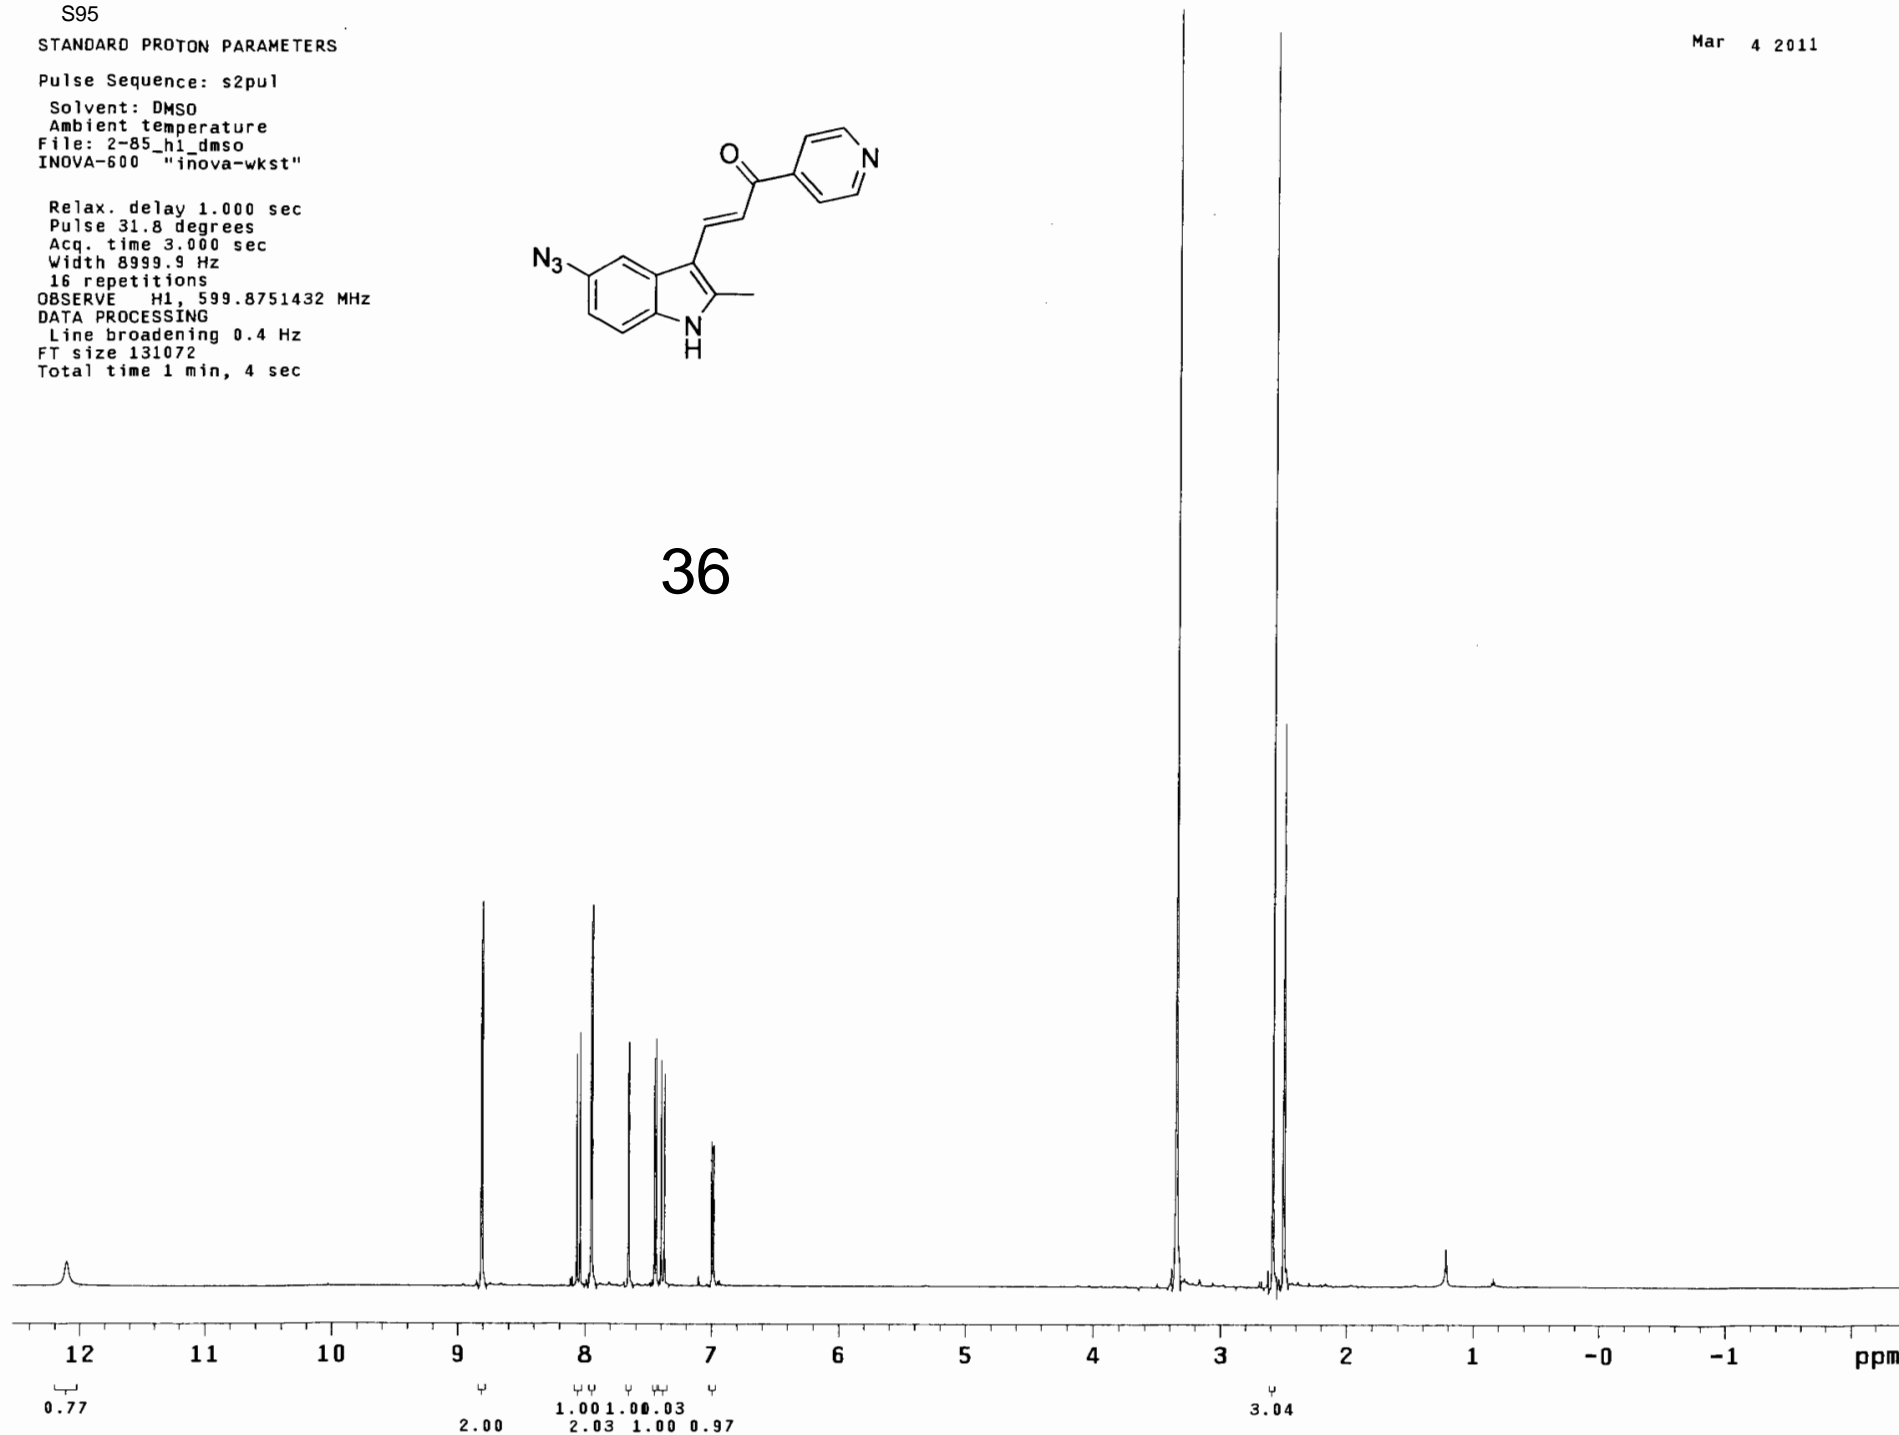

S96

STANDARD CARBON PARAMETERS

Pulse Sequence: s2pu1

Solvent: DMSO  
Ambient temperature  
User: 1-14-87  
File: 2-85\_c13\_dms0  
INOVA-600 "inova-wkst"

Pulse 46.4 degrees  
Acq. time 1.000 sec  
Width 37735.8 Hz  
24400 repetitions  
OBSERVE C13, 150.8387904 MHz  
DECOUPLE H1, 599.8781638 MHz  
Power 32 dB  
continuously on  
WALTZ-16 modulated  
DATA PROCESSING  
Gauss window 0.600 sec  
center at 0.100 sec  
FT size 524288  
Total time 28 hr, 1 min, 31 sec

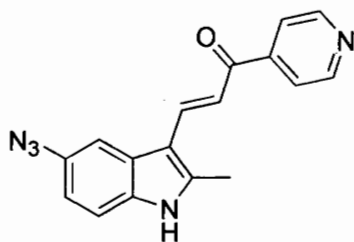

36

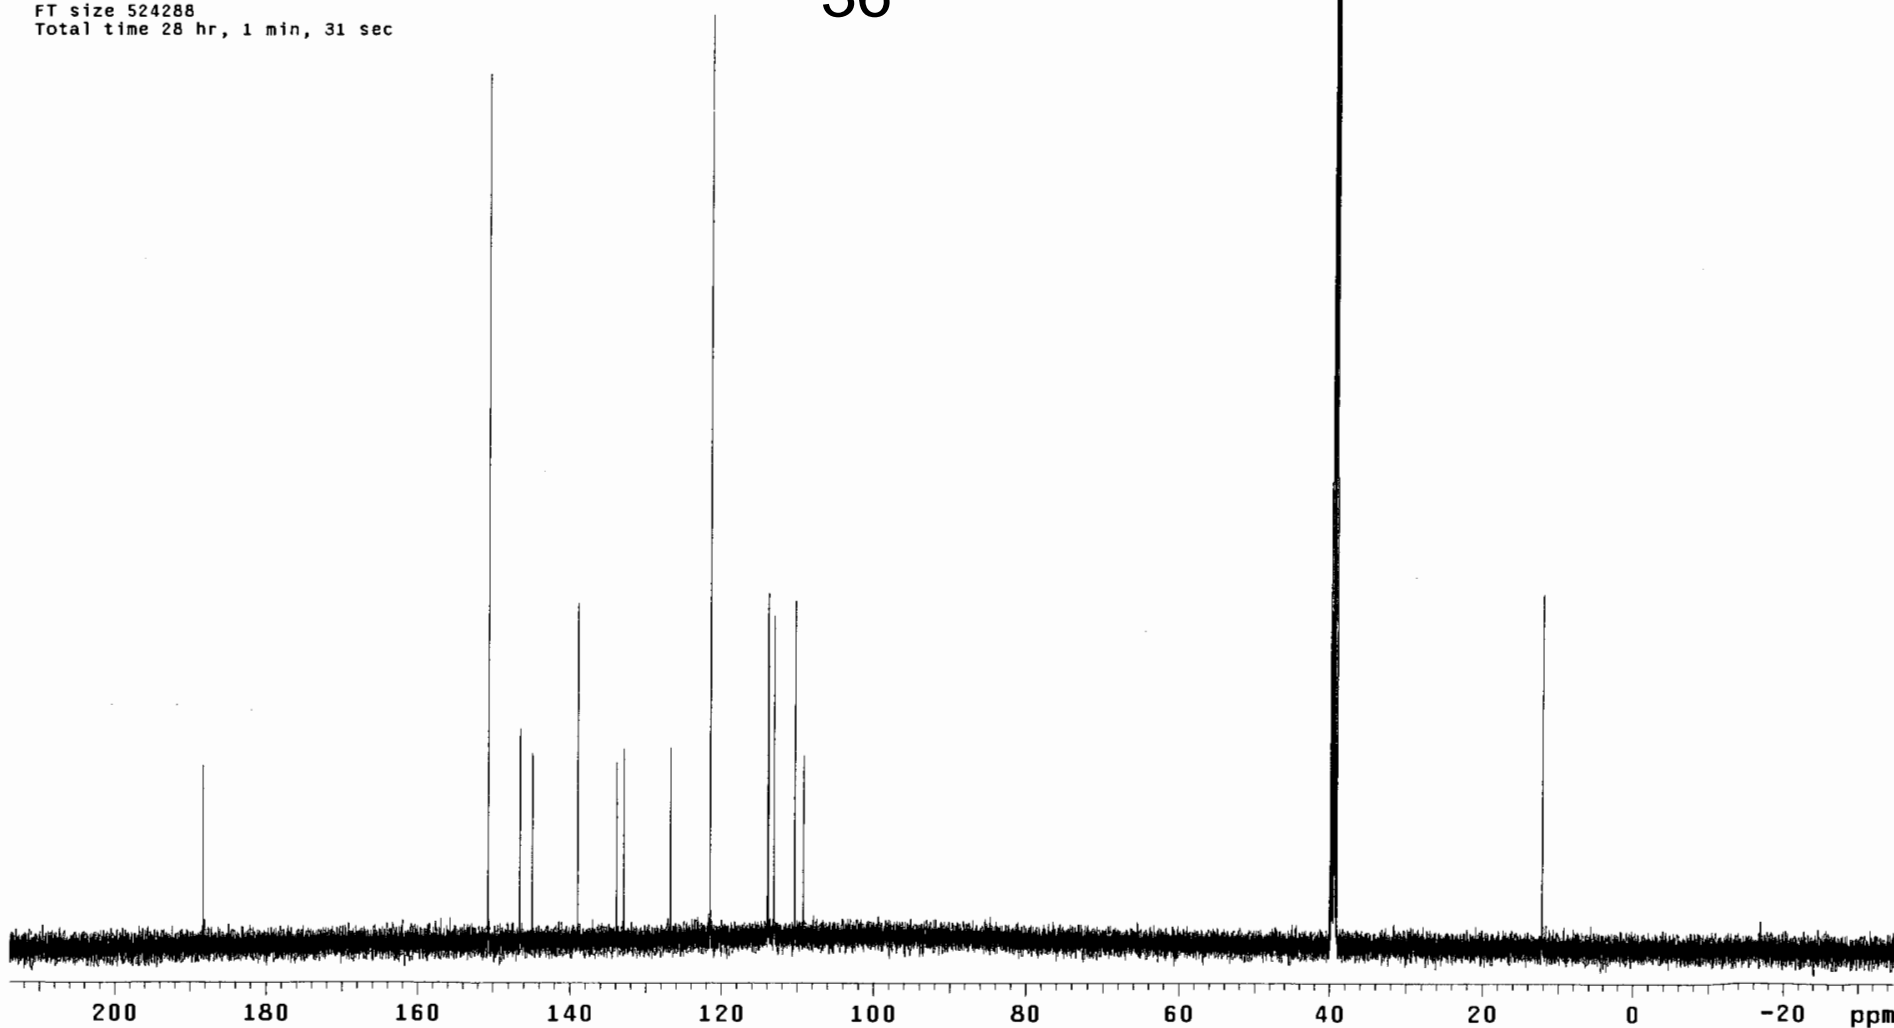



S97  
STANDARD PROTON PARAMETERS

Pulse Sequence: gcosy

Solvent: DMSO  
Ambient temperature  
INOVA-600 "inova600"

Relax. delay 1.000 sec  
Acq. time 0.142 sec  
Width 1797.6 Hz  
2D Width 1797.6 Hz  
Single scan  
74 increments

OBSERVE H1, 599.8751433 MHz  
DATA PROCESSING  
Sine bell 0.071 sec  
F1 DATA PROCESSING  
Sine bell 0.021 sec  
FT size 512 x 512  
Total time 1 min, 29 sec

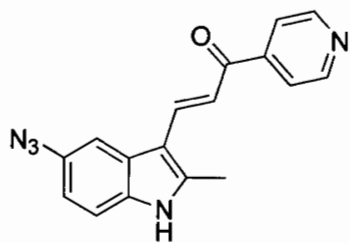

36

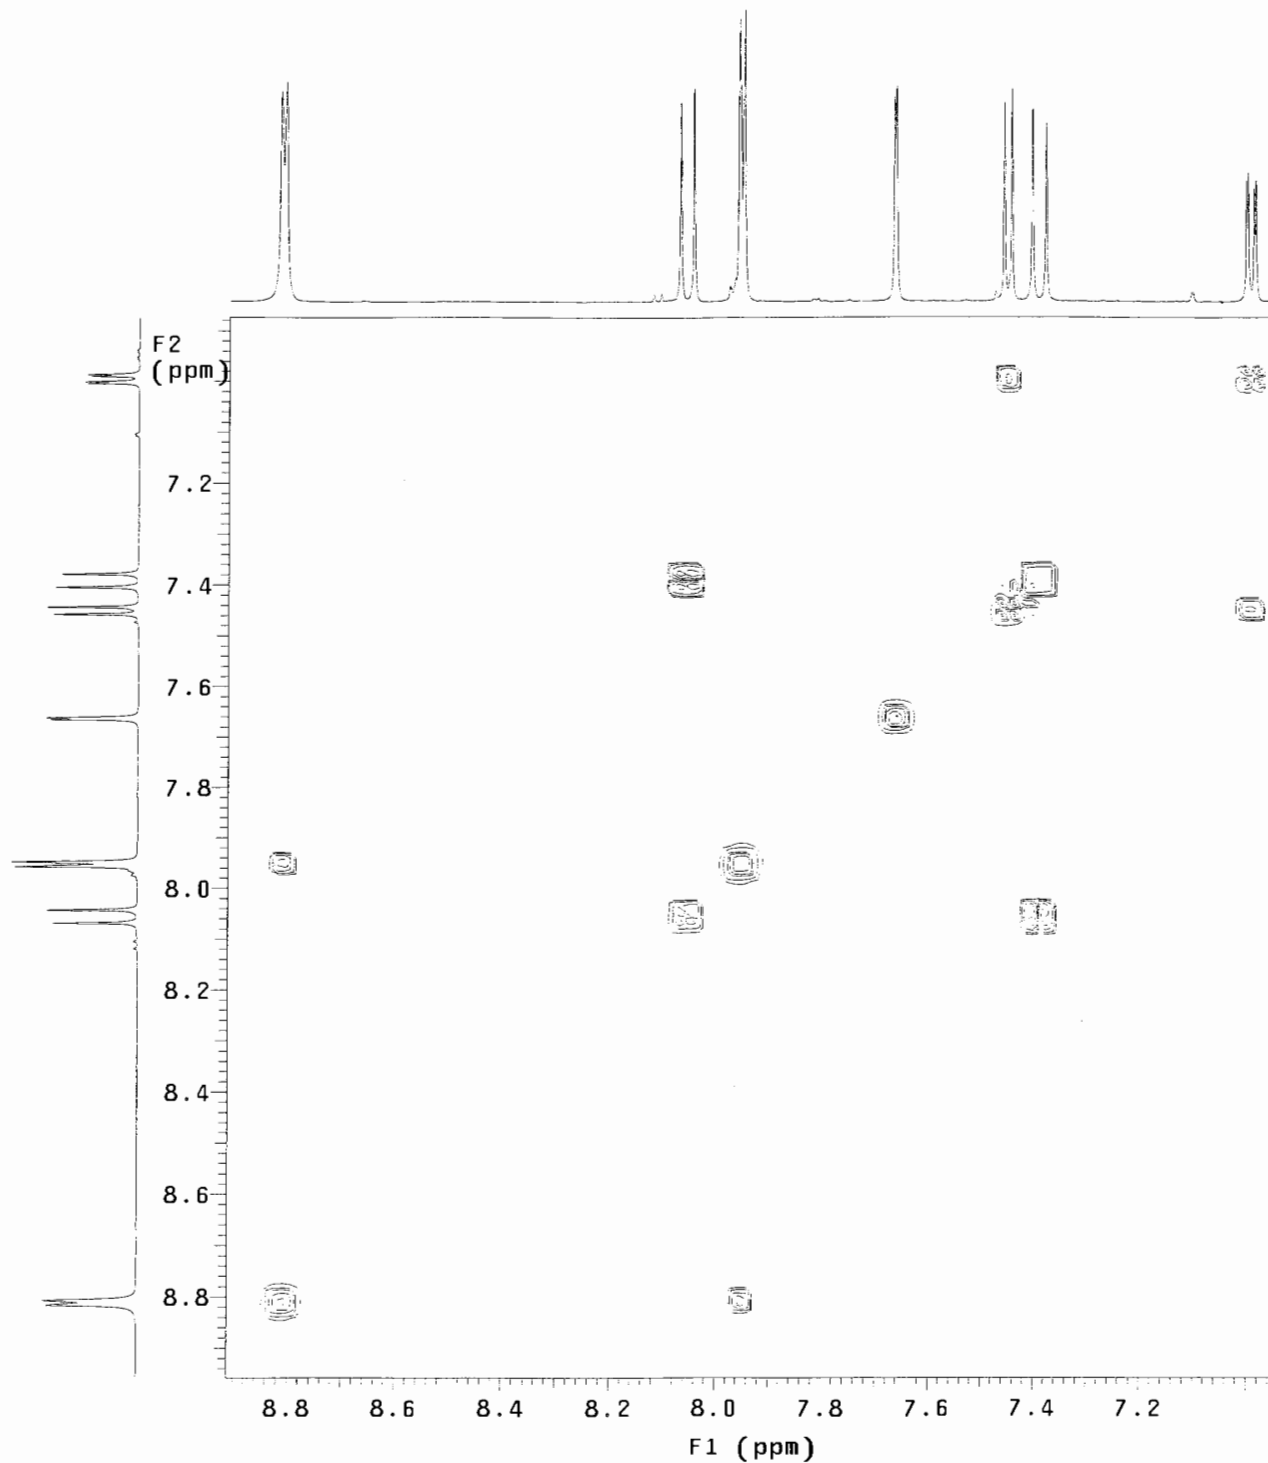

S98

STANDARD PROTON PARAMETERS

Pulse Sequence: s2pu1

Solvent: CDC13

Ambient temperature

File: 2-109\_A

INOVA-600 "inova-wkst"

Relax. delay 1.000 sec

Pulse 31.8 degrees

Acq. time 3.000 sec

Width 8000.0 Hz

16 repetitions

OBSERVE H1, 599.8723061 MHz

DATA PROCESSING

Line broadening 0.4 Hz

FT size 131072

Total time 1 min, 4 sec

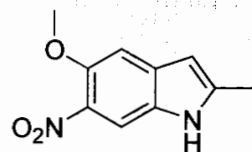

37

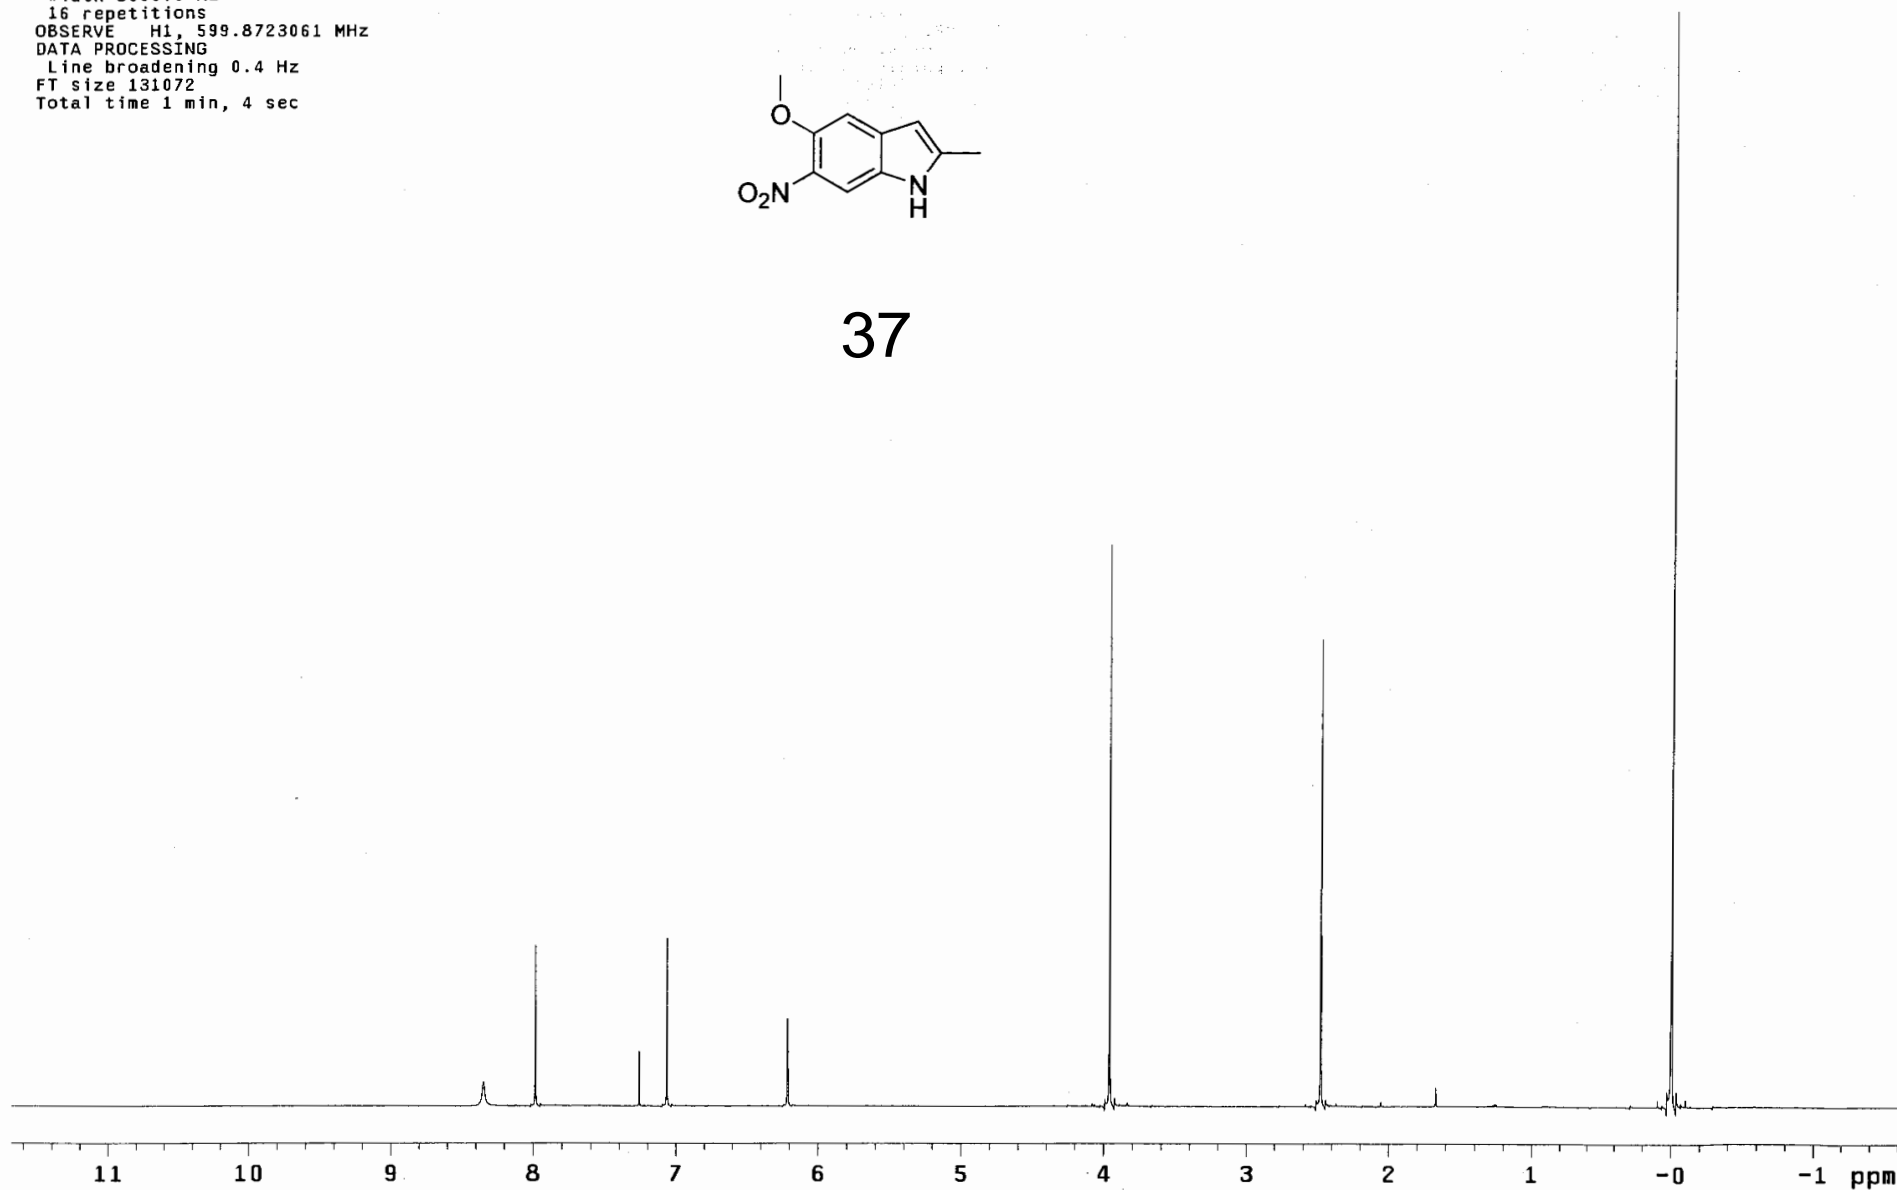

S99

STANDARD CARBON PARAMETERS

Pulse Sequence: s2pu1

Solvent: CDC13

Ambient temperature

User: 1-14-87

File: 2-109\_A\_C13

INOVA-600 "inova-wkst"

Pulse 46.4 degrees

Acq. time 1.000 sec

Width 37735.8 Hz

1760 repetitions

OBSERVE C13, 150.8379929 MHz

DECOUPLE H1, 599.8753144 MHz

Power 32 dB

continuously on

WALTZ-16 modulated

DATA PROCESSING

Gauss window 0.600 sec

center at 0.100 sec

FT size 524288

Total time 2 hr, 48 min, 9 sec

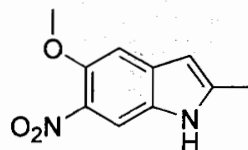

37

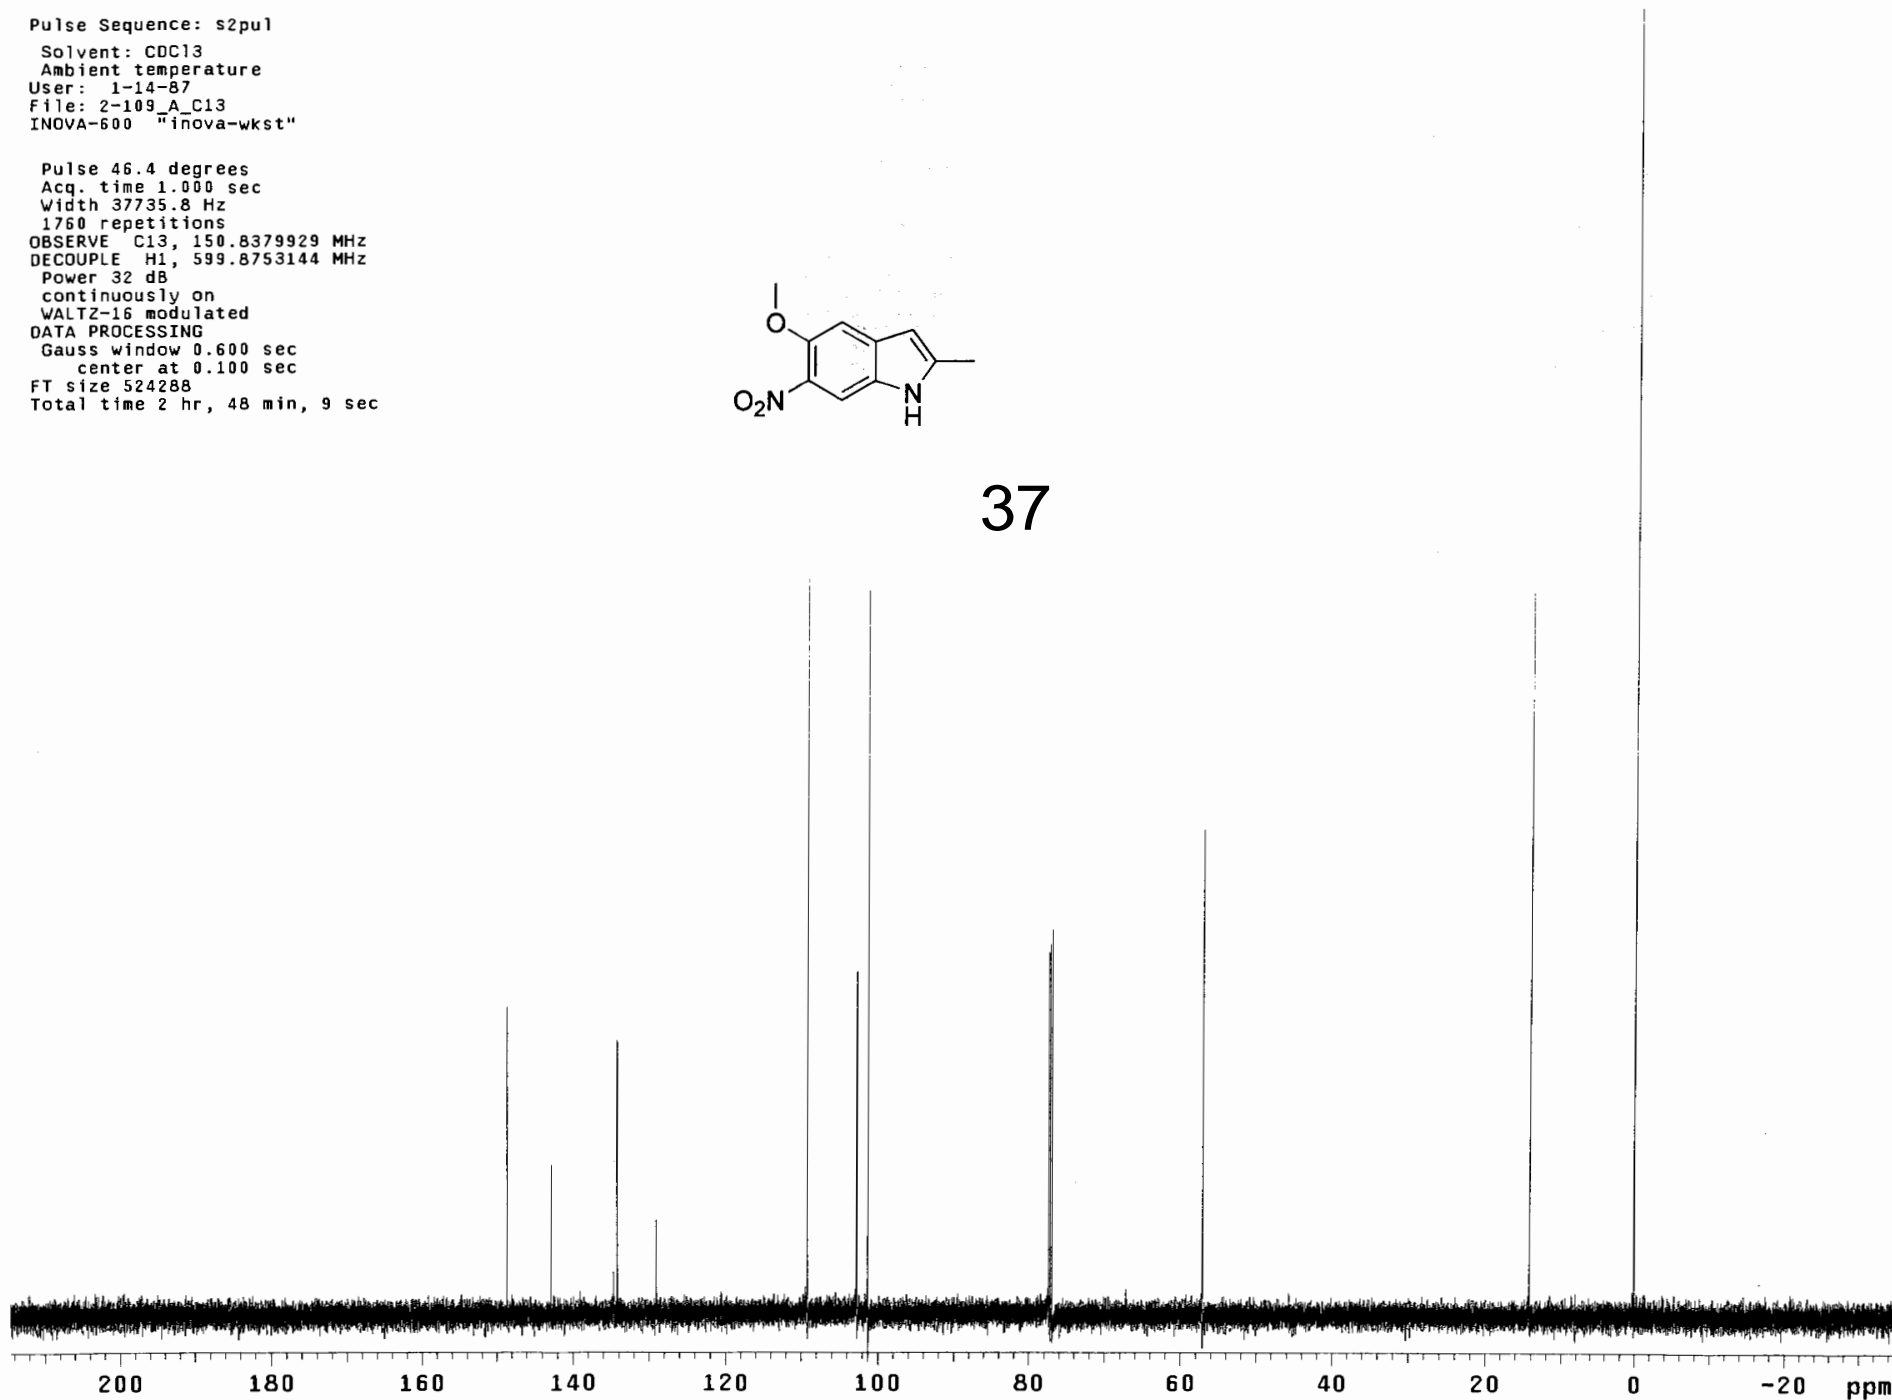

S100

STANDARD PROTON PARAMETERS

Pulse Sequence: gcosy

Solvent: CDCl3

Ambient temperature

File: 2-109\_A\_cosy

INOVA-600 "inova-wkst"

Relax. delay 1.000 sec

Acq. time 0.128 sec

Width 2007.8 Hz

2D Width 2007.8 Hz

Single scan

83 increments

OBSERVE H1, 599.8723061 MHz

DATA PROCESSING

Sine bell 0.064 sec

F1 DATA PROCESSING

Sine bell 0.021 sec

FT size 512 x 512

Total time 1 min, 38 sec

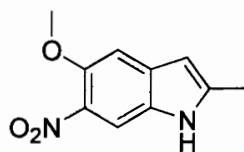

37

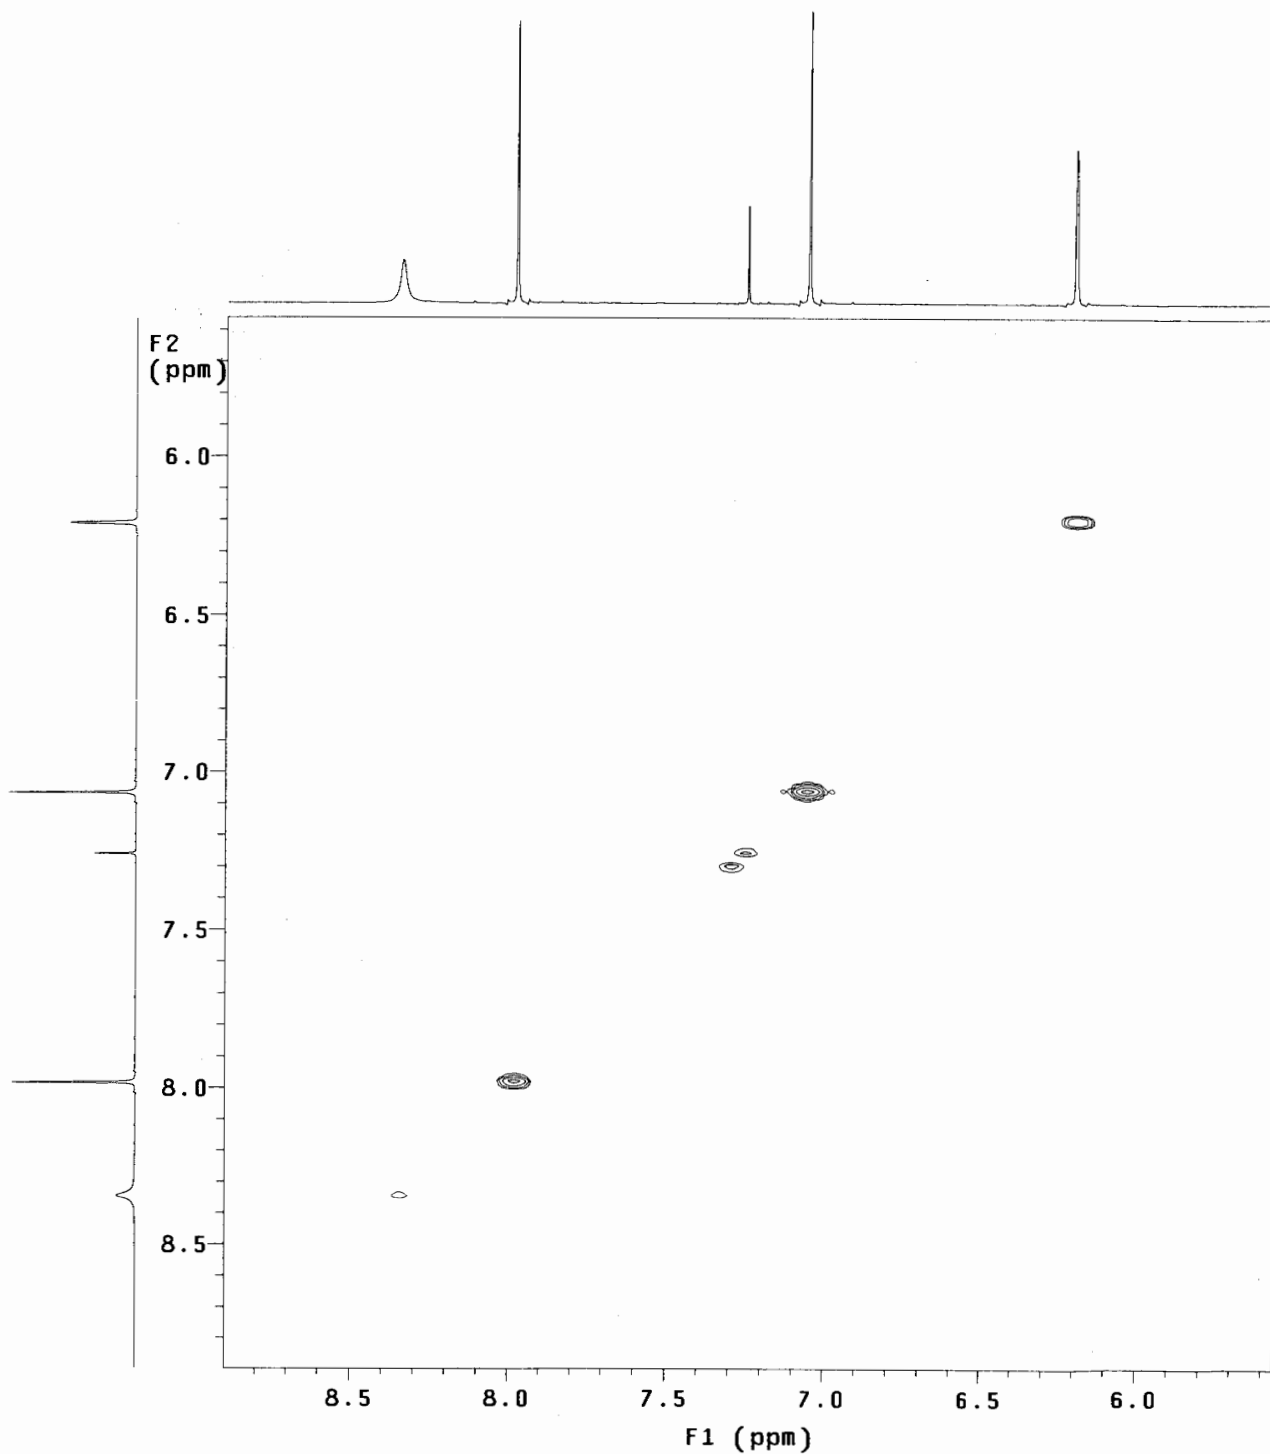

S101

STANDARD PROTON PARAMETERS

Pulse Sequence: s2pu1

Solvent: DMSO  
Ambient temperature  
INOVA-600 "inova600"

Relax. delay 1.000 sec  
Pulse 31.8 degrees  
Acq. time 3.000 sec  
Width 9000.9 Hz  
16 repetitions  
OBSERVE H1, 599.8751458 MHz  
DATA PROCESSING  
Line broadening 0.4 Hz  
FT size 131072  
Total time 1 min, 4 sec

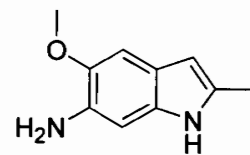

38

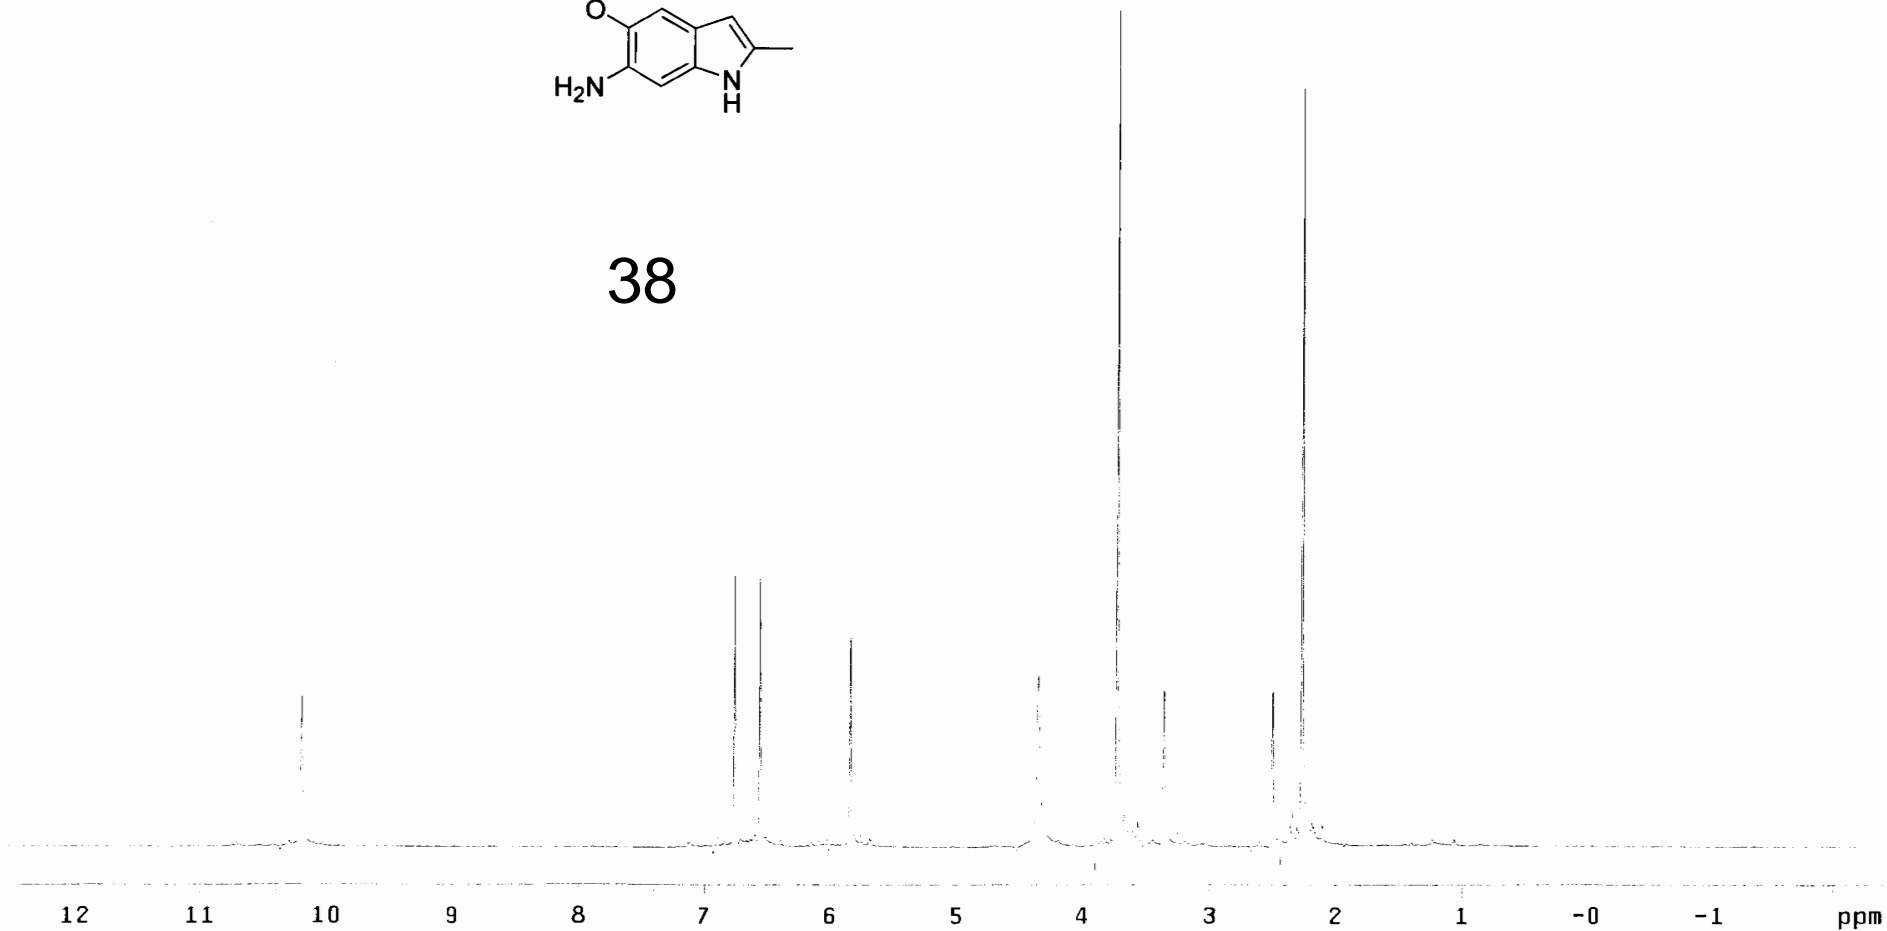

S102

STANDARD 1H OBSERVE

Pulse Sequence: s2pu1

Solvent: CDCl3

Ambient temperature

File: 2-117

INOVA-600 "inova-wkst"

Relax. delay 2.000 sec

Pulse 47.4 degrees

Acq. time 2.731 sec

Width 5999.7 Hz

32 repetitions

OBSERVE H1, 399.9486779 MHz

DATA PROCESSING

Line broadening 0.5 Hz

FT size 65536

Total time 2 min, 31 sec

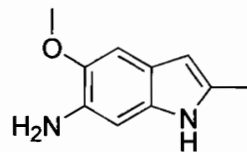

38

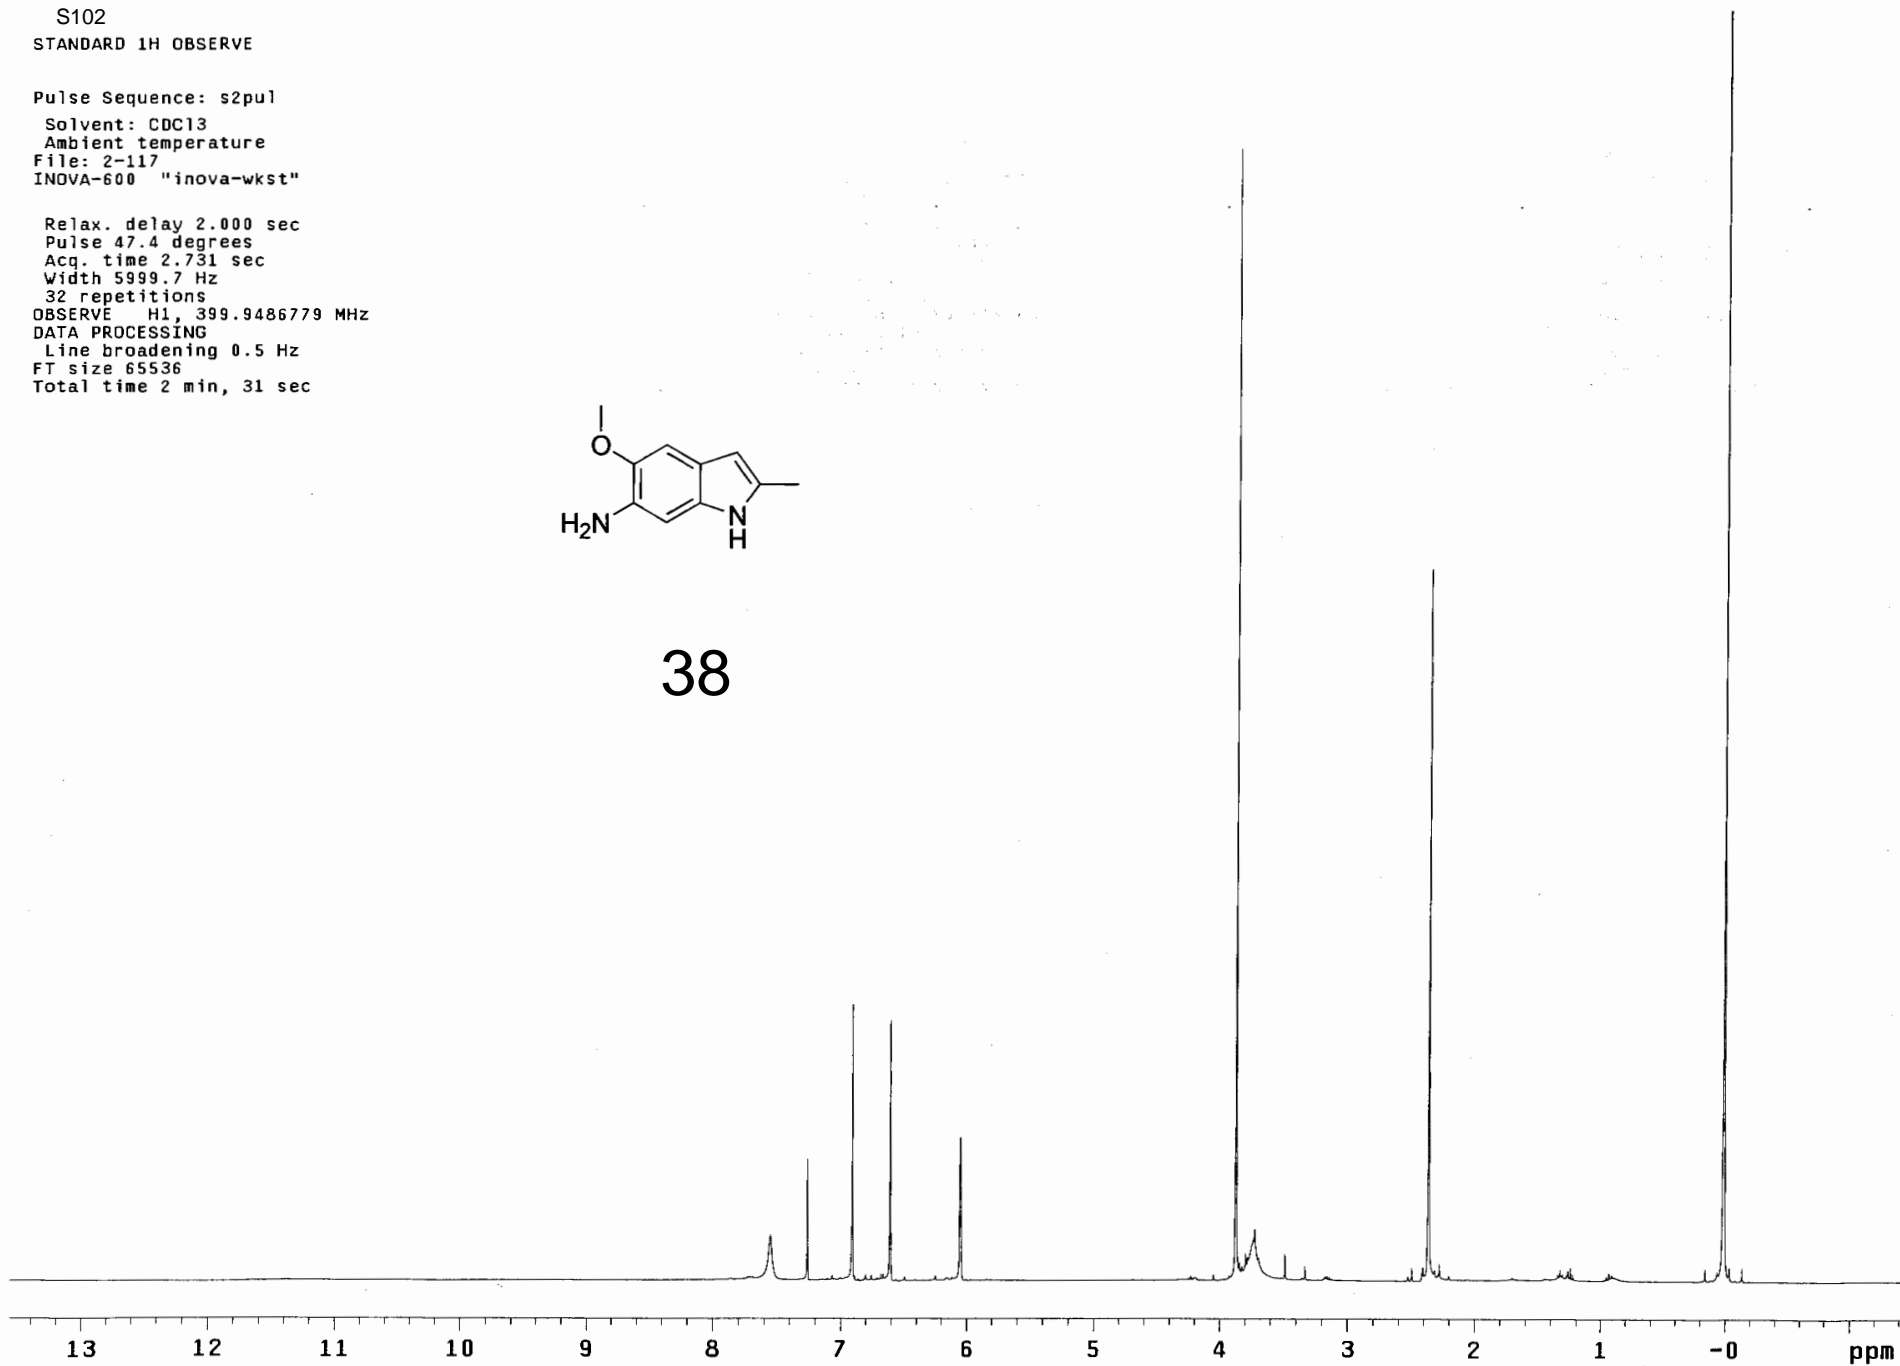

S103

STANDARD CARBON PARAMETERS

Jun 9 2011

Pulse Sequence: s2pul

Solvent: DMSO

Ambient temperature

User: 1-14-87

File: 2-99\_c13\_6\_9\_2011

GEMINI-200BB "gem2000"

Pulse 46.4 degrees

Acq. time 1.000 sec

Width 37735.8 Hz

576 repetitions

OBSERVE C13, 150.8387896 MHz

DECOUPLE H1, 599.8781638 MHz

Power 32 dB

continuously on

WALTZ-16 modulated

DATA PROCESSING

Gauss window 0.600 sec

center at 0.100 sec

FT size 524288

Total time 36 hr, 47 min, 1 sec

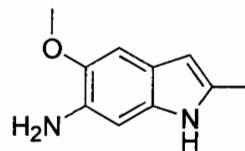

38

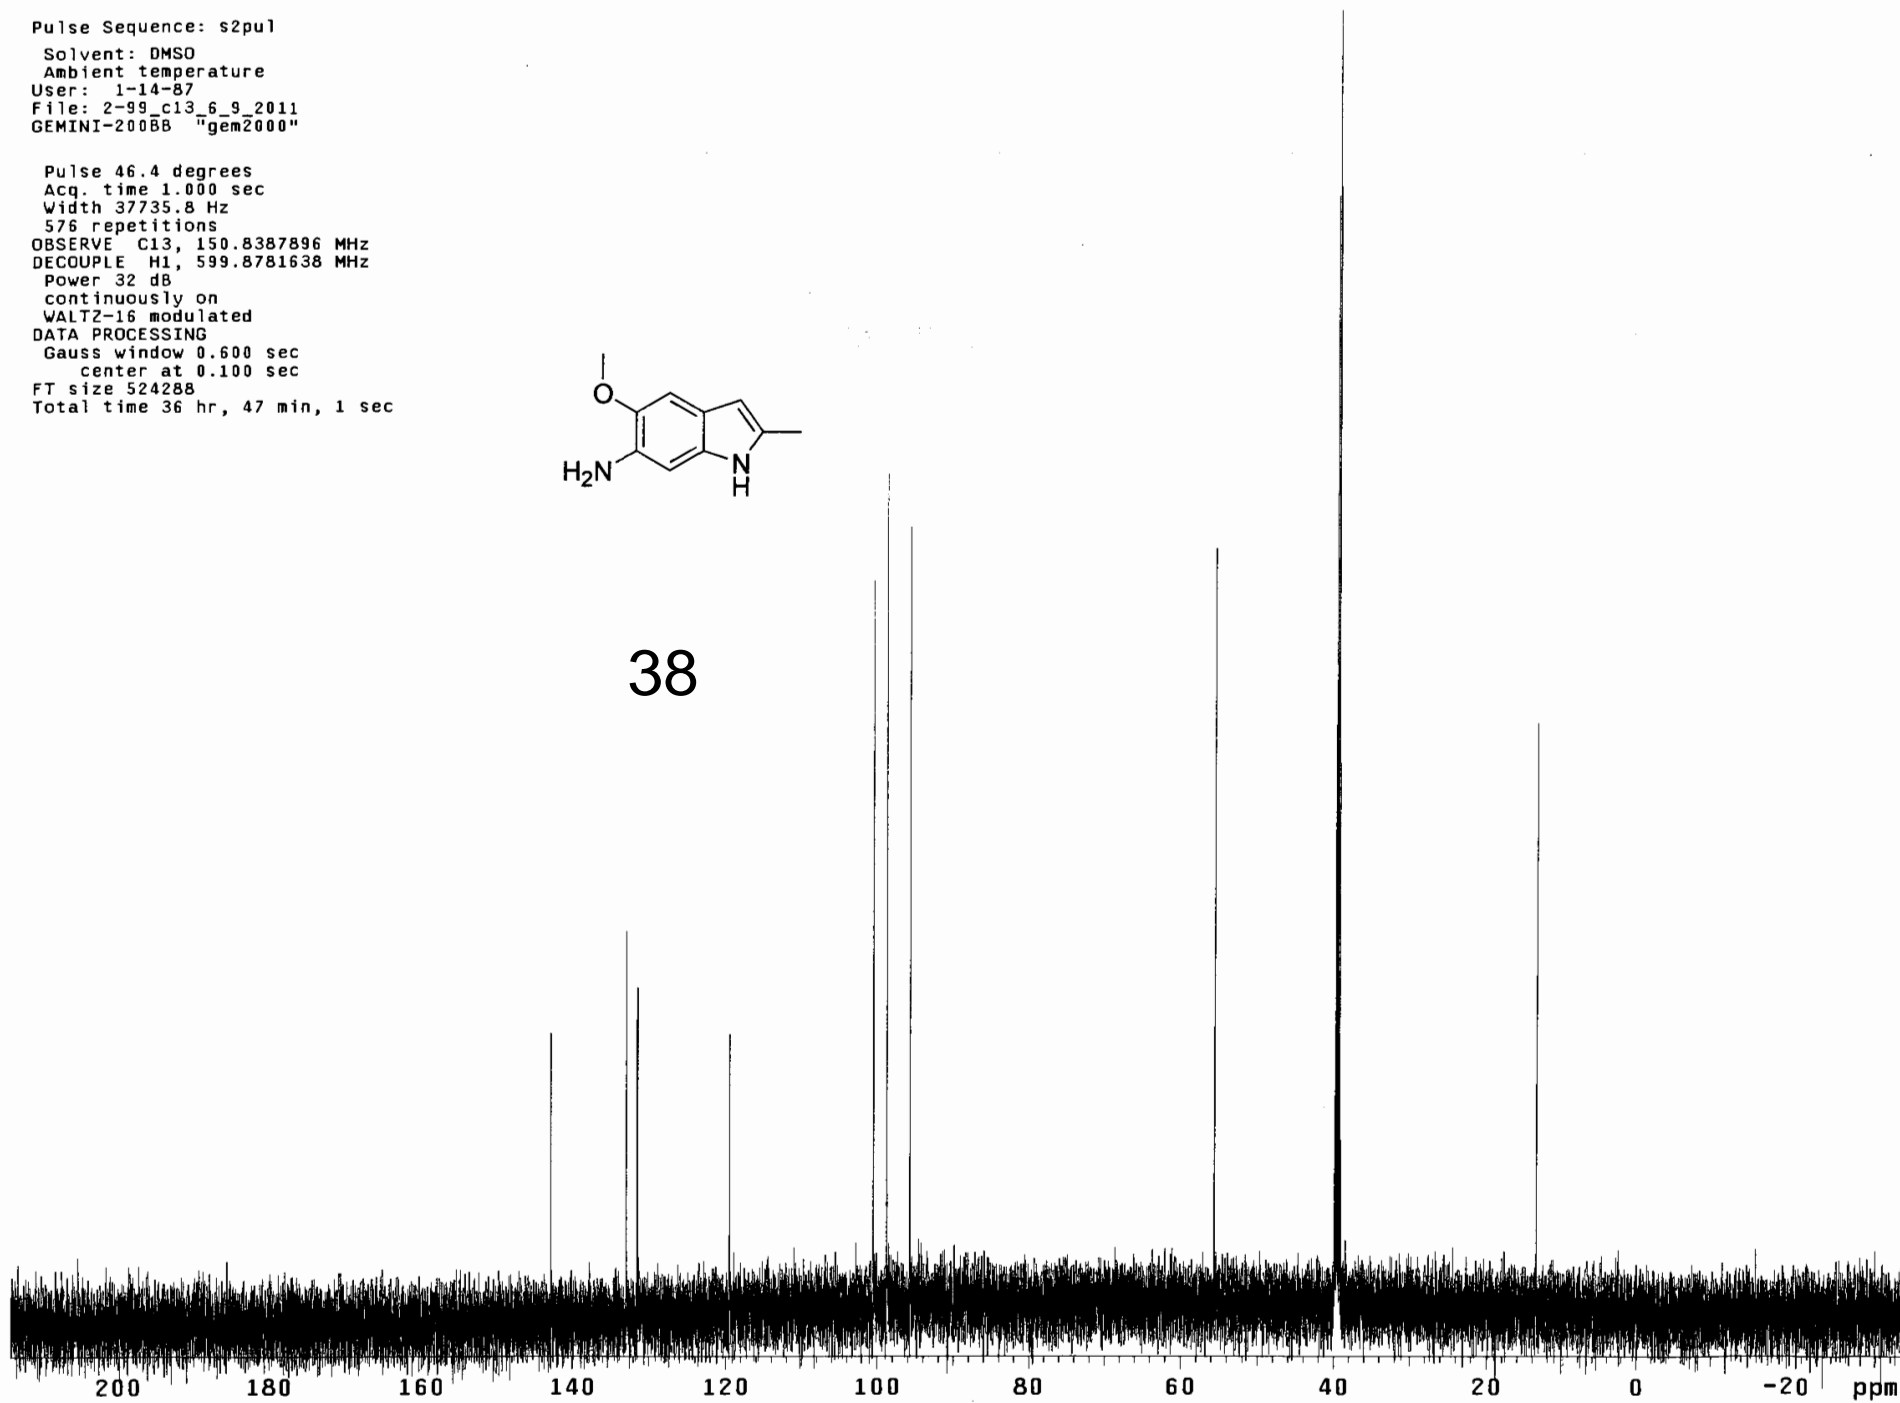

200

180

160

140

120

100

80

60

40

20

0

-20

ppm

S104

STANDARD PROTON PARAMETERS

Pulse Sequence: gcosy

Solvent: DMSO  
Ambient temperature  
INOVA-600 "inova600"

Relax. delay 1.000 sec  
Acq. time 0.219 sec  
Width 1170.6 Hz  
2D Width 1170.6 Hz  
Single scan  
48 increments  
OBSERVE H1, 599.8751458 MHz  
DATA PROCESSING  
Sine bell 0.109 sec  
F1 DATA PROCESSING  
Sine bell 0.021 sec  
FT size 512 x 512  
Total time 1 min, 2 sec

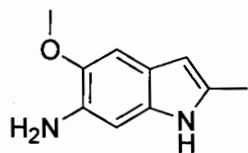

38

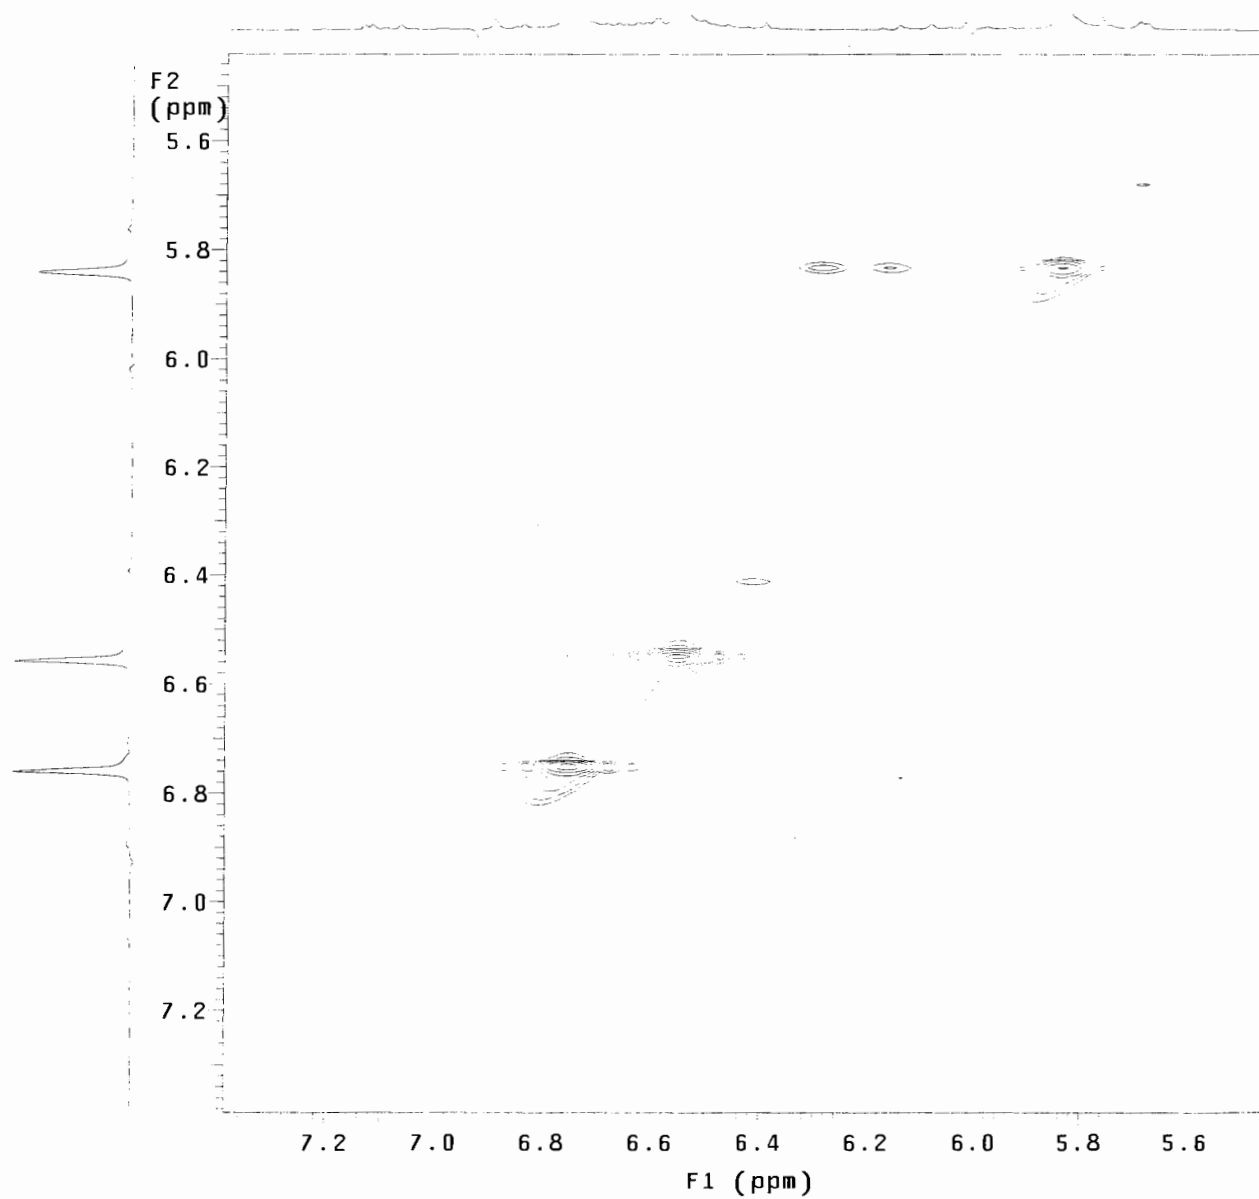



S105

STANDARD PROTON PARAMETERS

Pulse Sequence: s2pu1

Solvent: CDCl3

Ambient temperature

File: 2-119

INOVA-600 "inova-wkst"

Relax. delay 1.000 sec

Pulse 31.8 degrees

Acq. time 3.000 sec

Width 8000.0 Hz

16 repetitions

OBSERVE H1, 599.8723055 MHz

DATA PROCESSING

Line broadening 0.4 Hz

FT size 131072

Total time 1 min, 4 sec

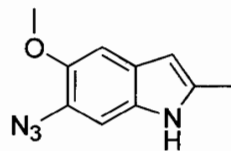

39

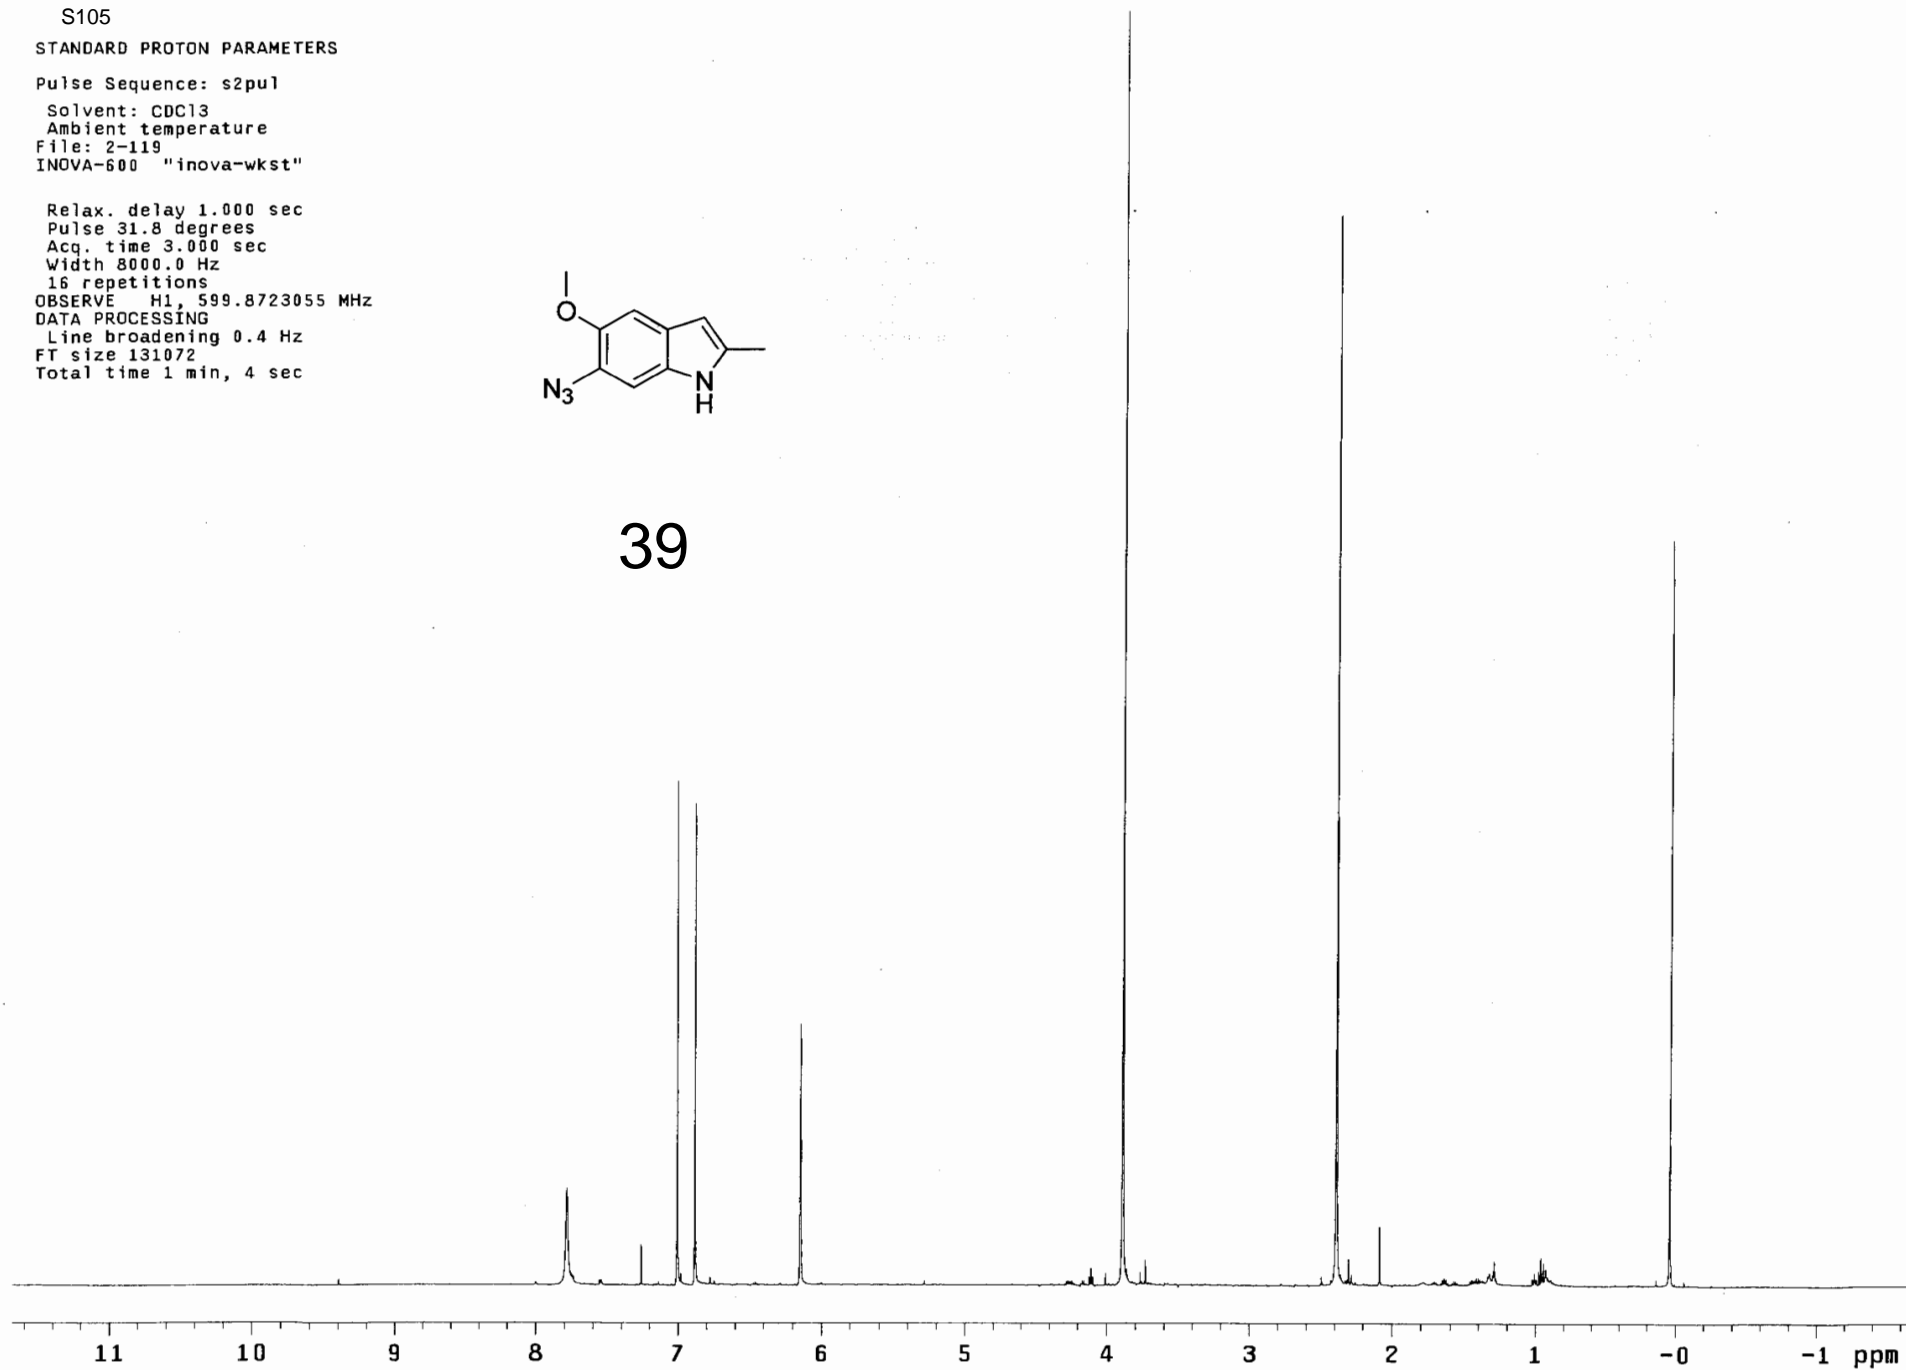

S106

STANDARD CARBON PARAMETERS

Pulse Sequence: s2pu1

Solvent: CDCl3

Ambient temperature

User: 1-14-87

File: 2-119\_c13

INOVA-600 "inova-wkst"

Pulse 46.4 degrees

Acq. time 1.000 sec

Width 37735.8 Hz

400 repetitions

OBSERVE C13, 150.8380121 MHz

DECOUPLE H1, 599.8753144 MHz

Power 32 dB

continuously on

WALTZ-16 modulated

DATA PROCESSING

Gauss window 0.600 sec

center at 0.100 sec

FT size 524288

Total time 2 hr, 48 min, 9 sec

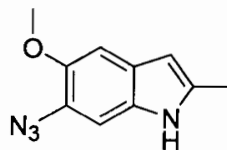

39

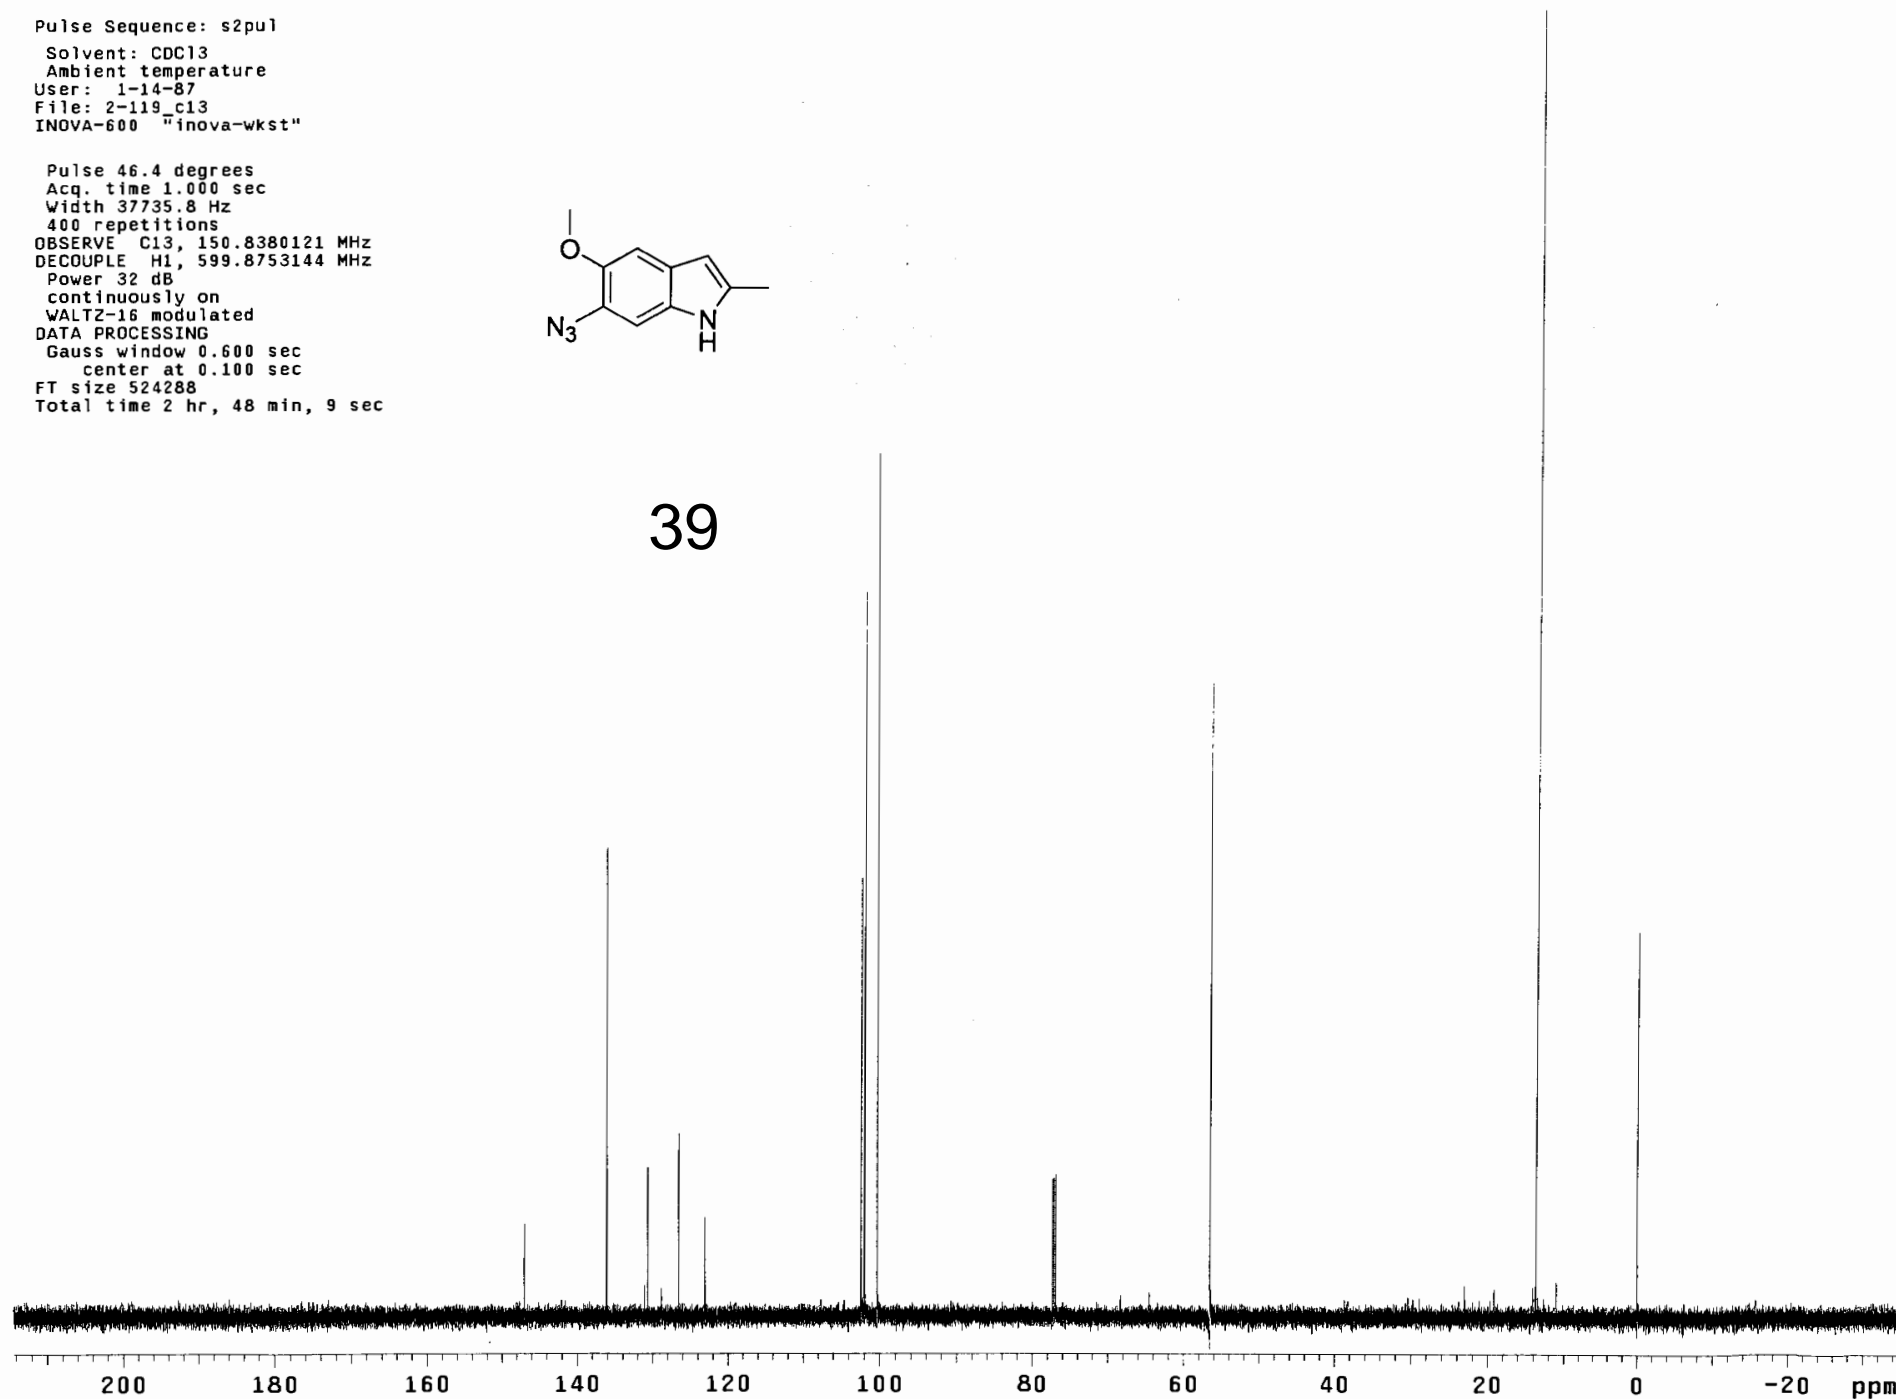

S107

STANDARD PROTON PARAMETERS

Pulse Sequence: gcosy

Solvent: CDCl3

Ambient temperature

File: 2-119\_cosy

INOVA-600 "inova-wkst"

Relax. delay 1.000 sec

Acq. time 0.242 sec

Width 4225.9 Hz

2D Width 4225.9 Hz

Single scan

176 increments

OBSERVE H1, 599.8723055 MHz

DATA PROCESSING

Sine bell 0.121 sec

F1 DATA PROCESSING

Sine bell 0.021 sec

FT size 2048 x 2048

Total time 3 min, 47 sec

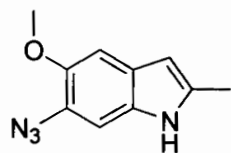

39

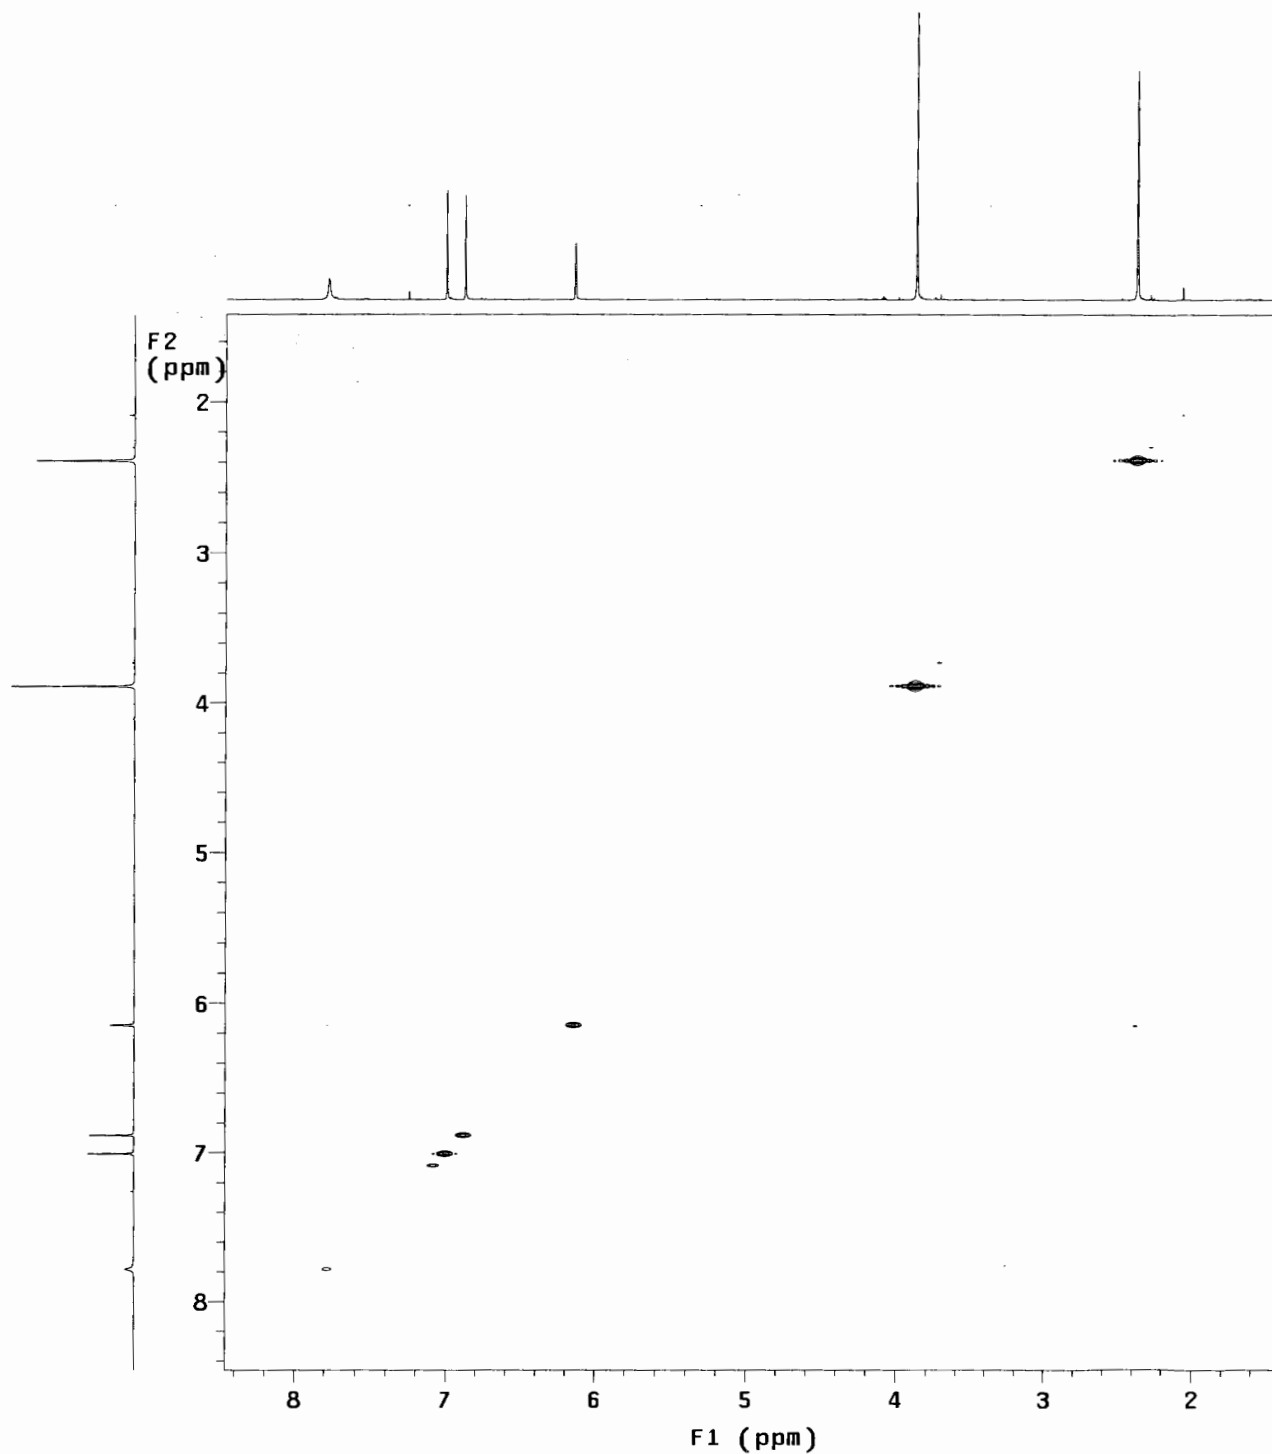

S108

STANDARD PROTON PARAMETERS

Pulse Sequence: s2pu1

Solvent: DMSO

Ambient temperature

INOVA-600 "inova600"

Relax. delay 1.000 sec

Pulse 31.8 degrees

Acq. time 3.000 sec

Width 9000.9 Hz

16 repetitions

OBSERVE H1, 599.8751433 MHz

DATA PROCESSING

Line broadening 0.4 Hz

FT size 131072

Total time 1 min, 4 sec

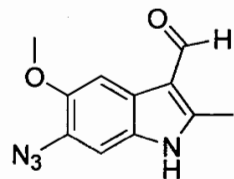

40

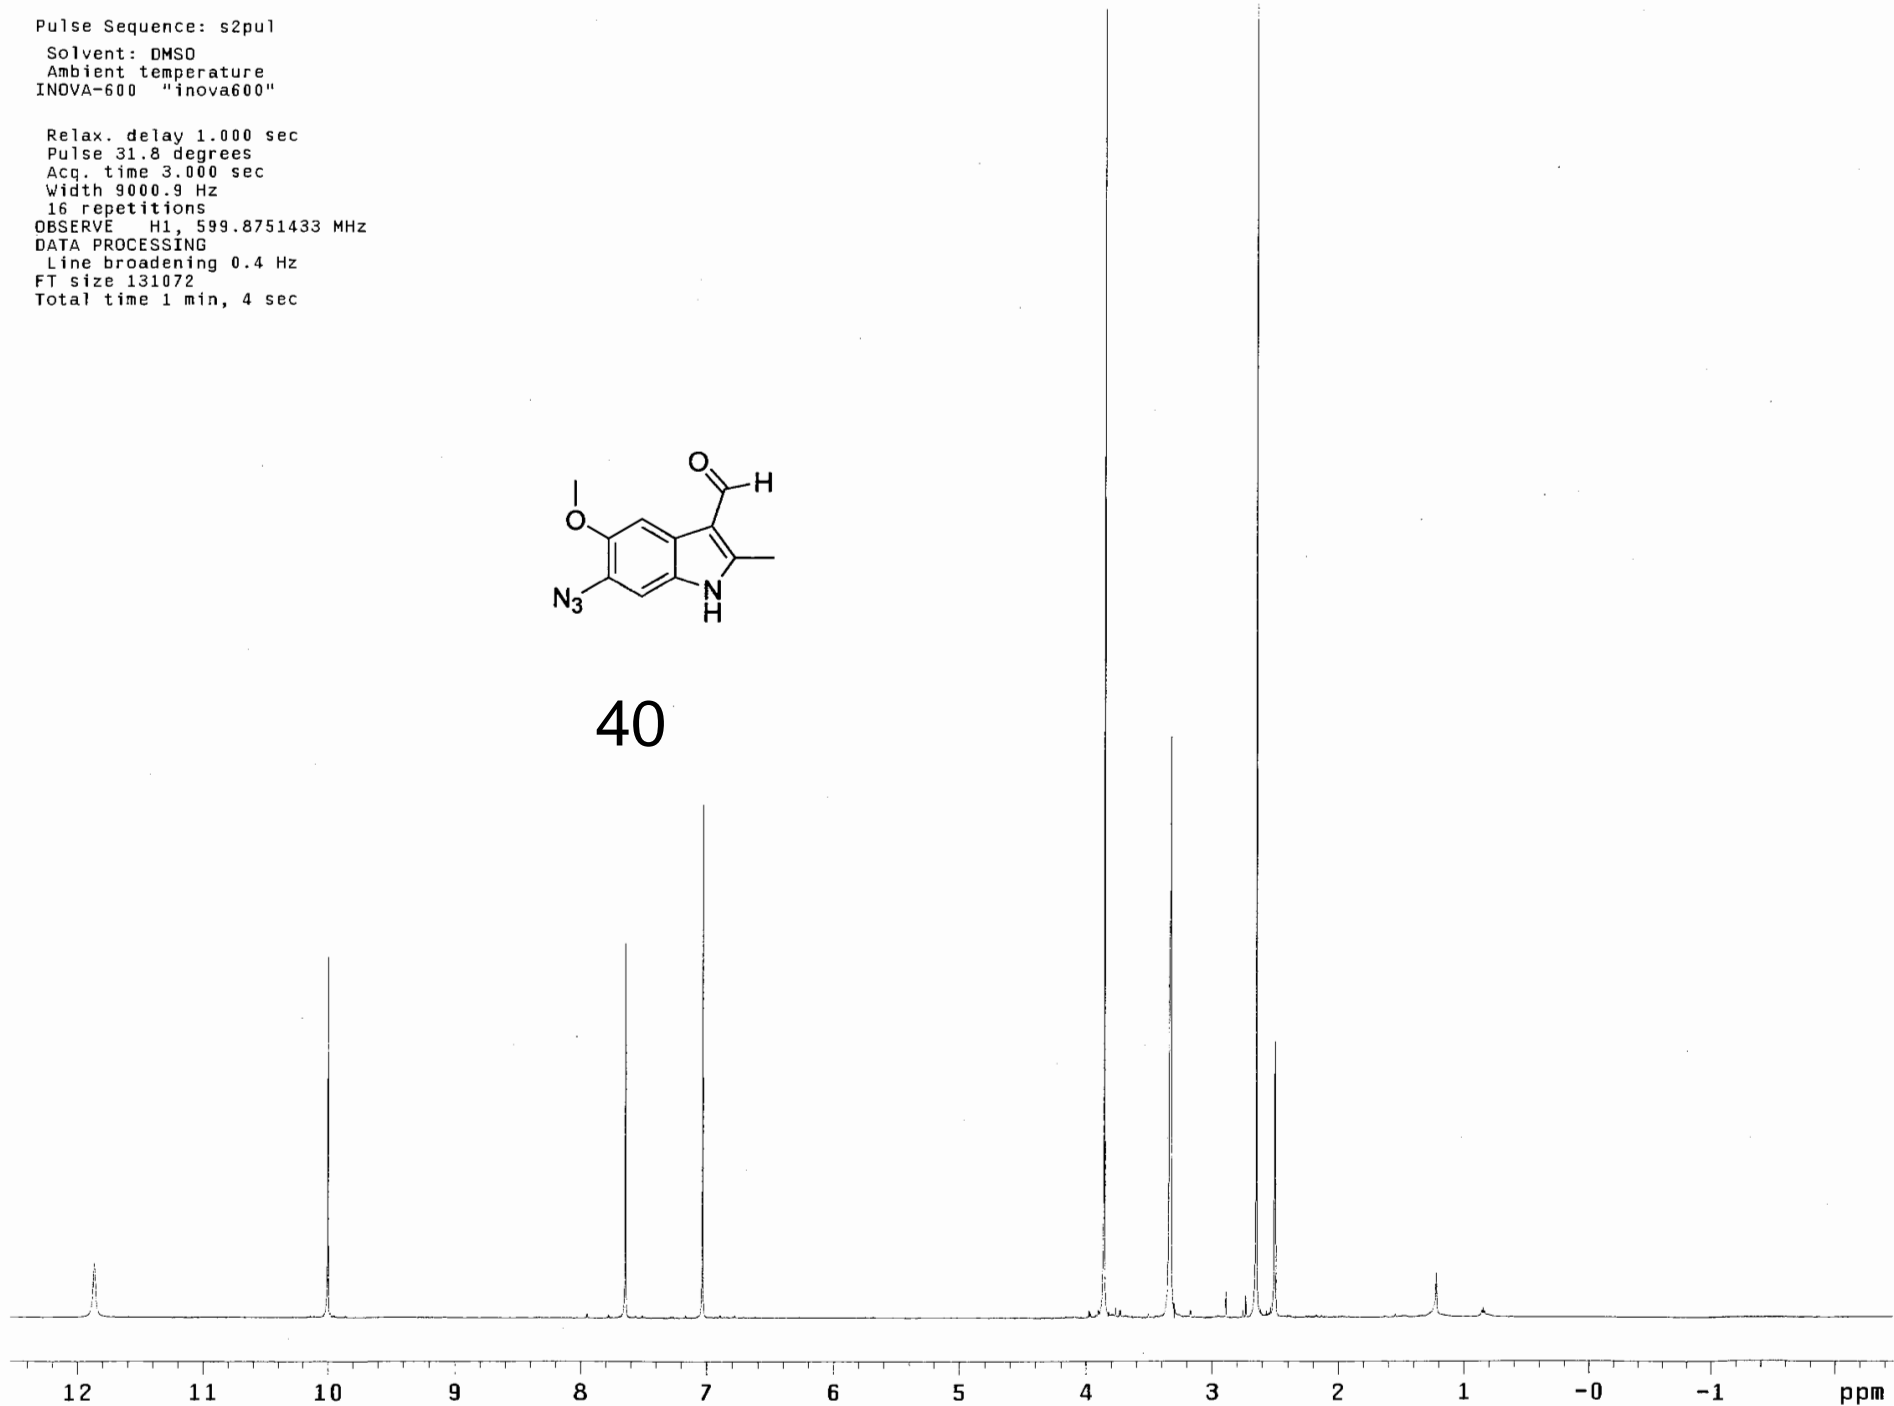

S109

STANDARD CARBON PARAMETERS

Pulse Sequence: s2pul

Solvent: DMSO

Temp. 25.0 C / 298.1 K

User: 1-14-87

INOVA-600 "inova600"

Pulse 46.4 degrees

Acq. time 1.000 sec

Width 37735.8 Hz

41392 repetitions

OBSERVE C13, 150.8386940 MHz

DECOUPLE H1, 599.8781638 MHz

Power 32 dB

continuously on

WALTZ-16 modulated

DATA PROCESSING

Gauss window 0.600 sec

center at 0.100 sec

FT size 524288

Total time 14 hr, 45 sec

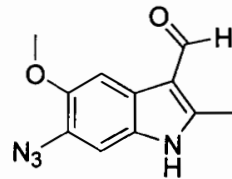

40

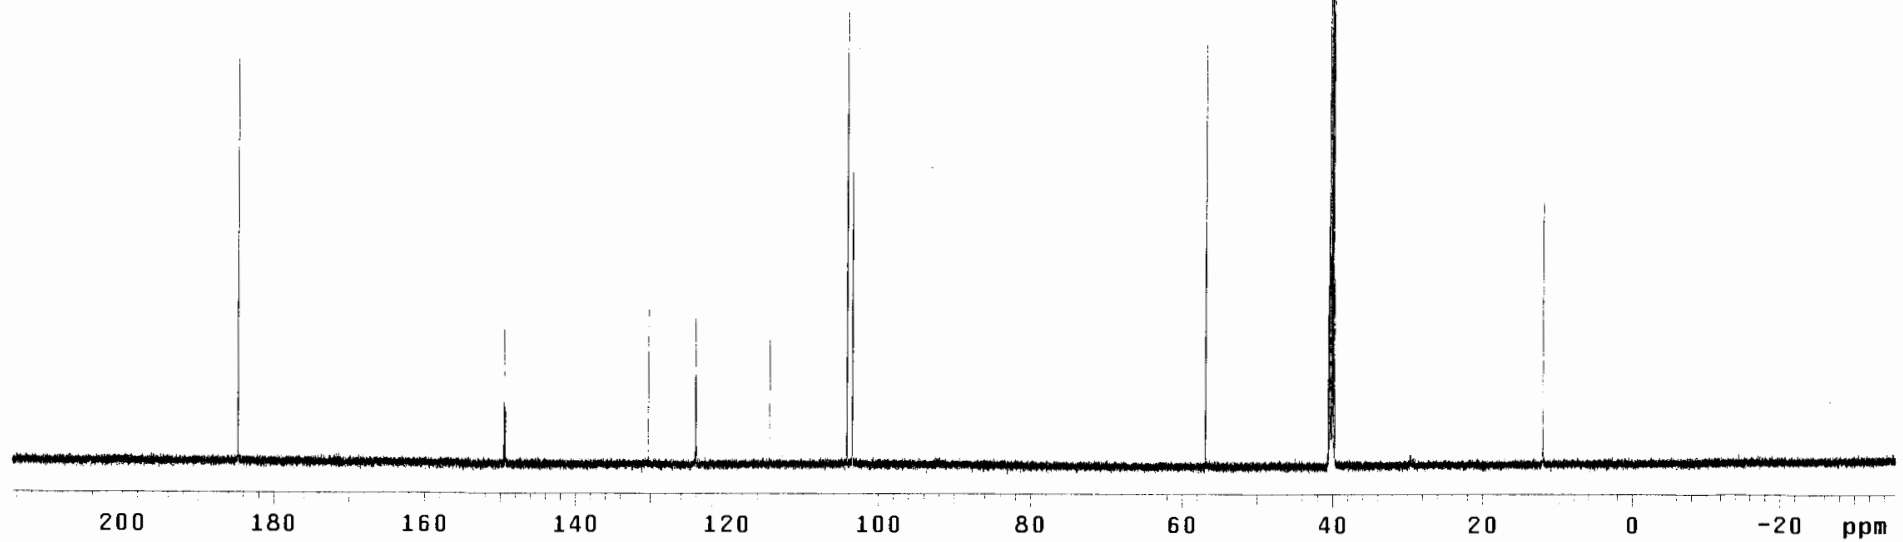

S110  
STANDARD PROTON PARAMETERS

Pulse Sequence: gcosy  
Solvent: DMSO  
Temp. 25.0 C / 298.1 K  
File: 2-107\_cosy\_b  
INDVA-600 "inova600"

Relax. delay 1.000 sec  
Acq. time 0.158 sec  
Width 1616.0 Hz  
2D Width 1616.0 Hz  
Single scan  
67 increments  
OBSERVE H1, 599.8751439 MHz  
DATA PROCESSING  
Sine bell 0.079 sec  
F1 DATA PROCESSING  
Sine bell 0.021 sec  
FT size 512 x 512  
Total time 1 min, 22 sec

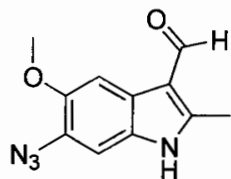

40

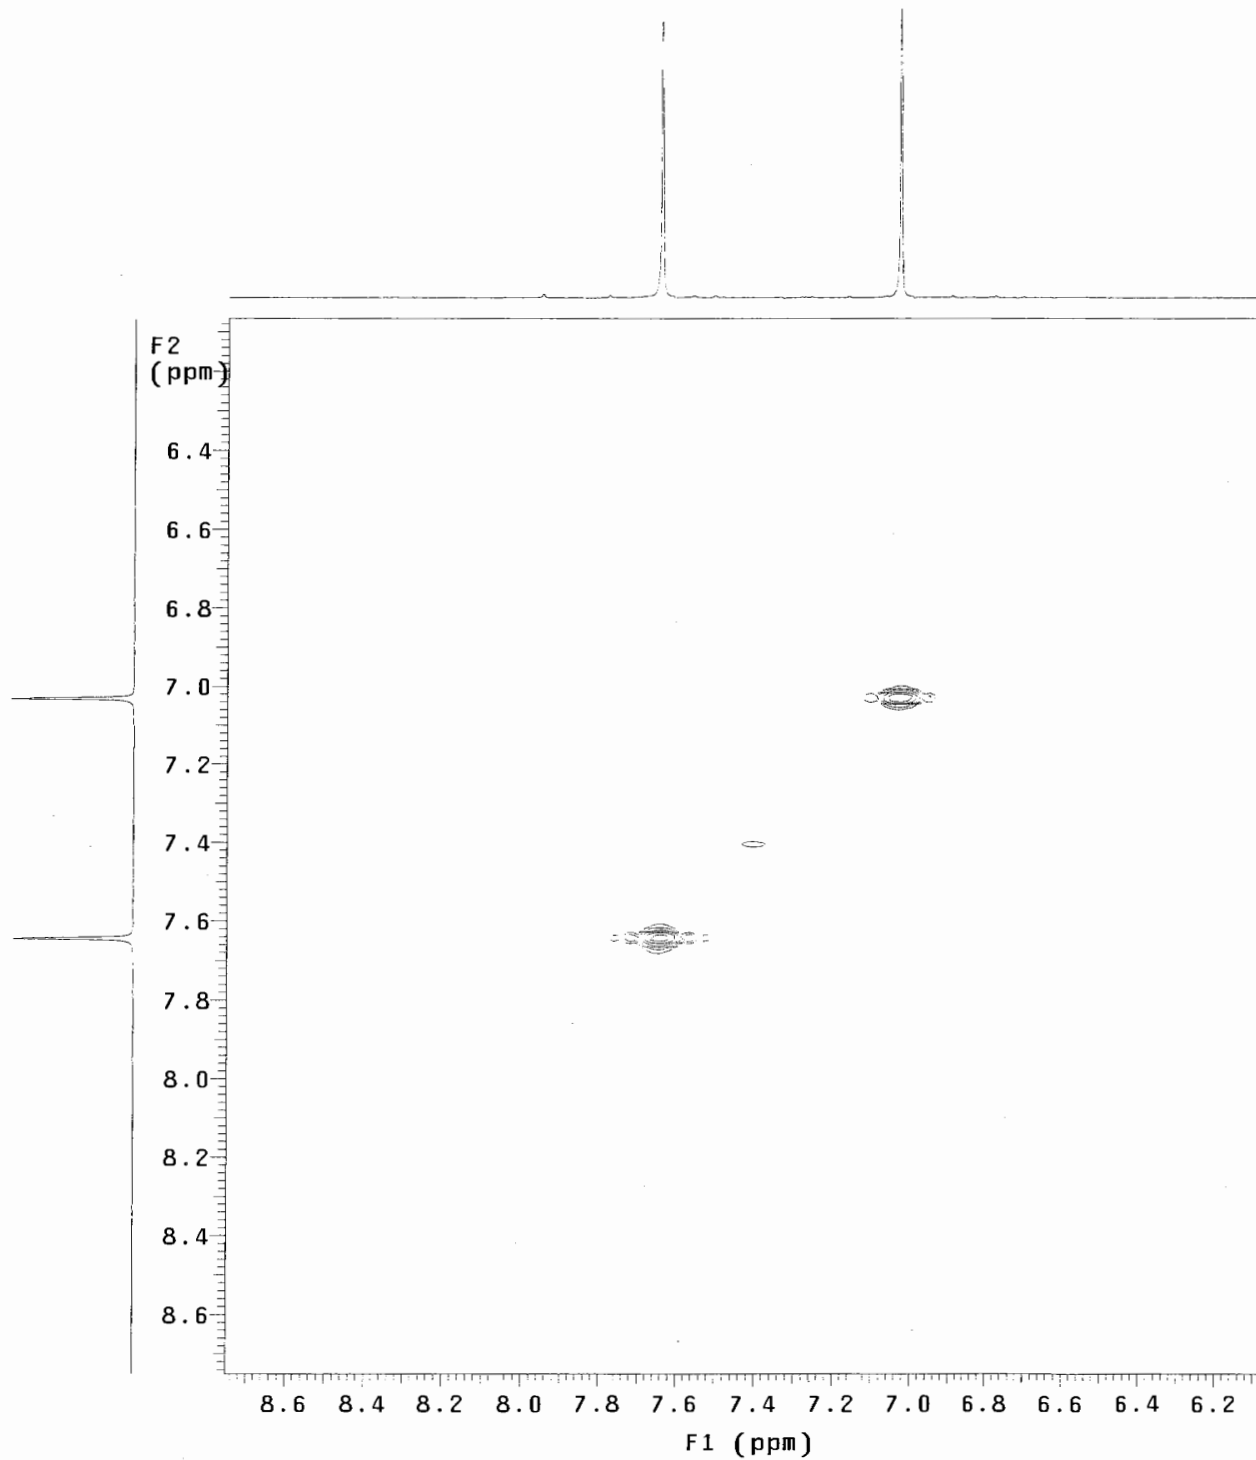

S111

STANDARD PROTON PARAMETERS

Pulse Sequence: s2pu1

Solvent: DMSO

Ambient temperature

File: 2-113\_H1\_b

INOVA-600 "inova-wkst"

Relax. delay 1.000 sec

Pulse 31.8 degrees

Acq. time 3.000 sec

Width 8999.9 Hz

16 repetitions

OBSERVE H1, 599.8751432 MHz

DATA PROCESSING

Line broadening 0.4 Hz

FT size 131072

Total time 1 min, 4 sec

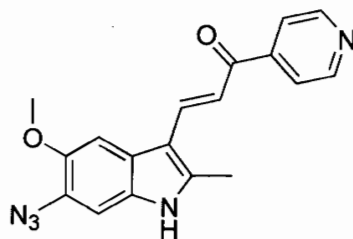

41

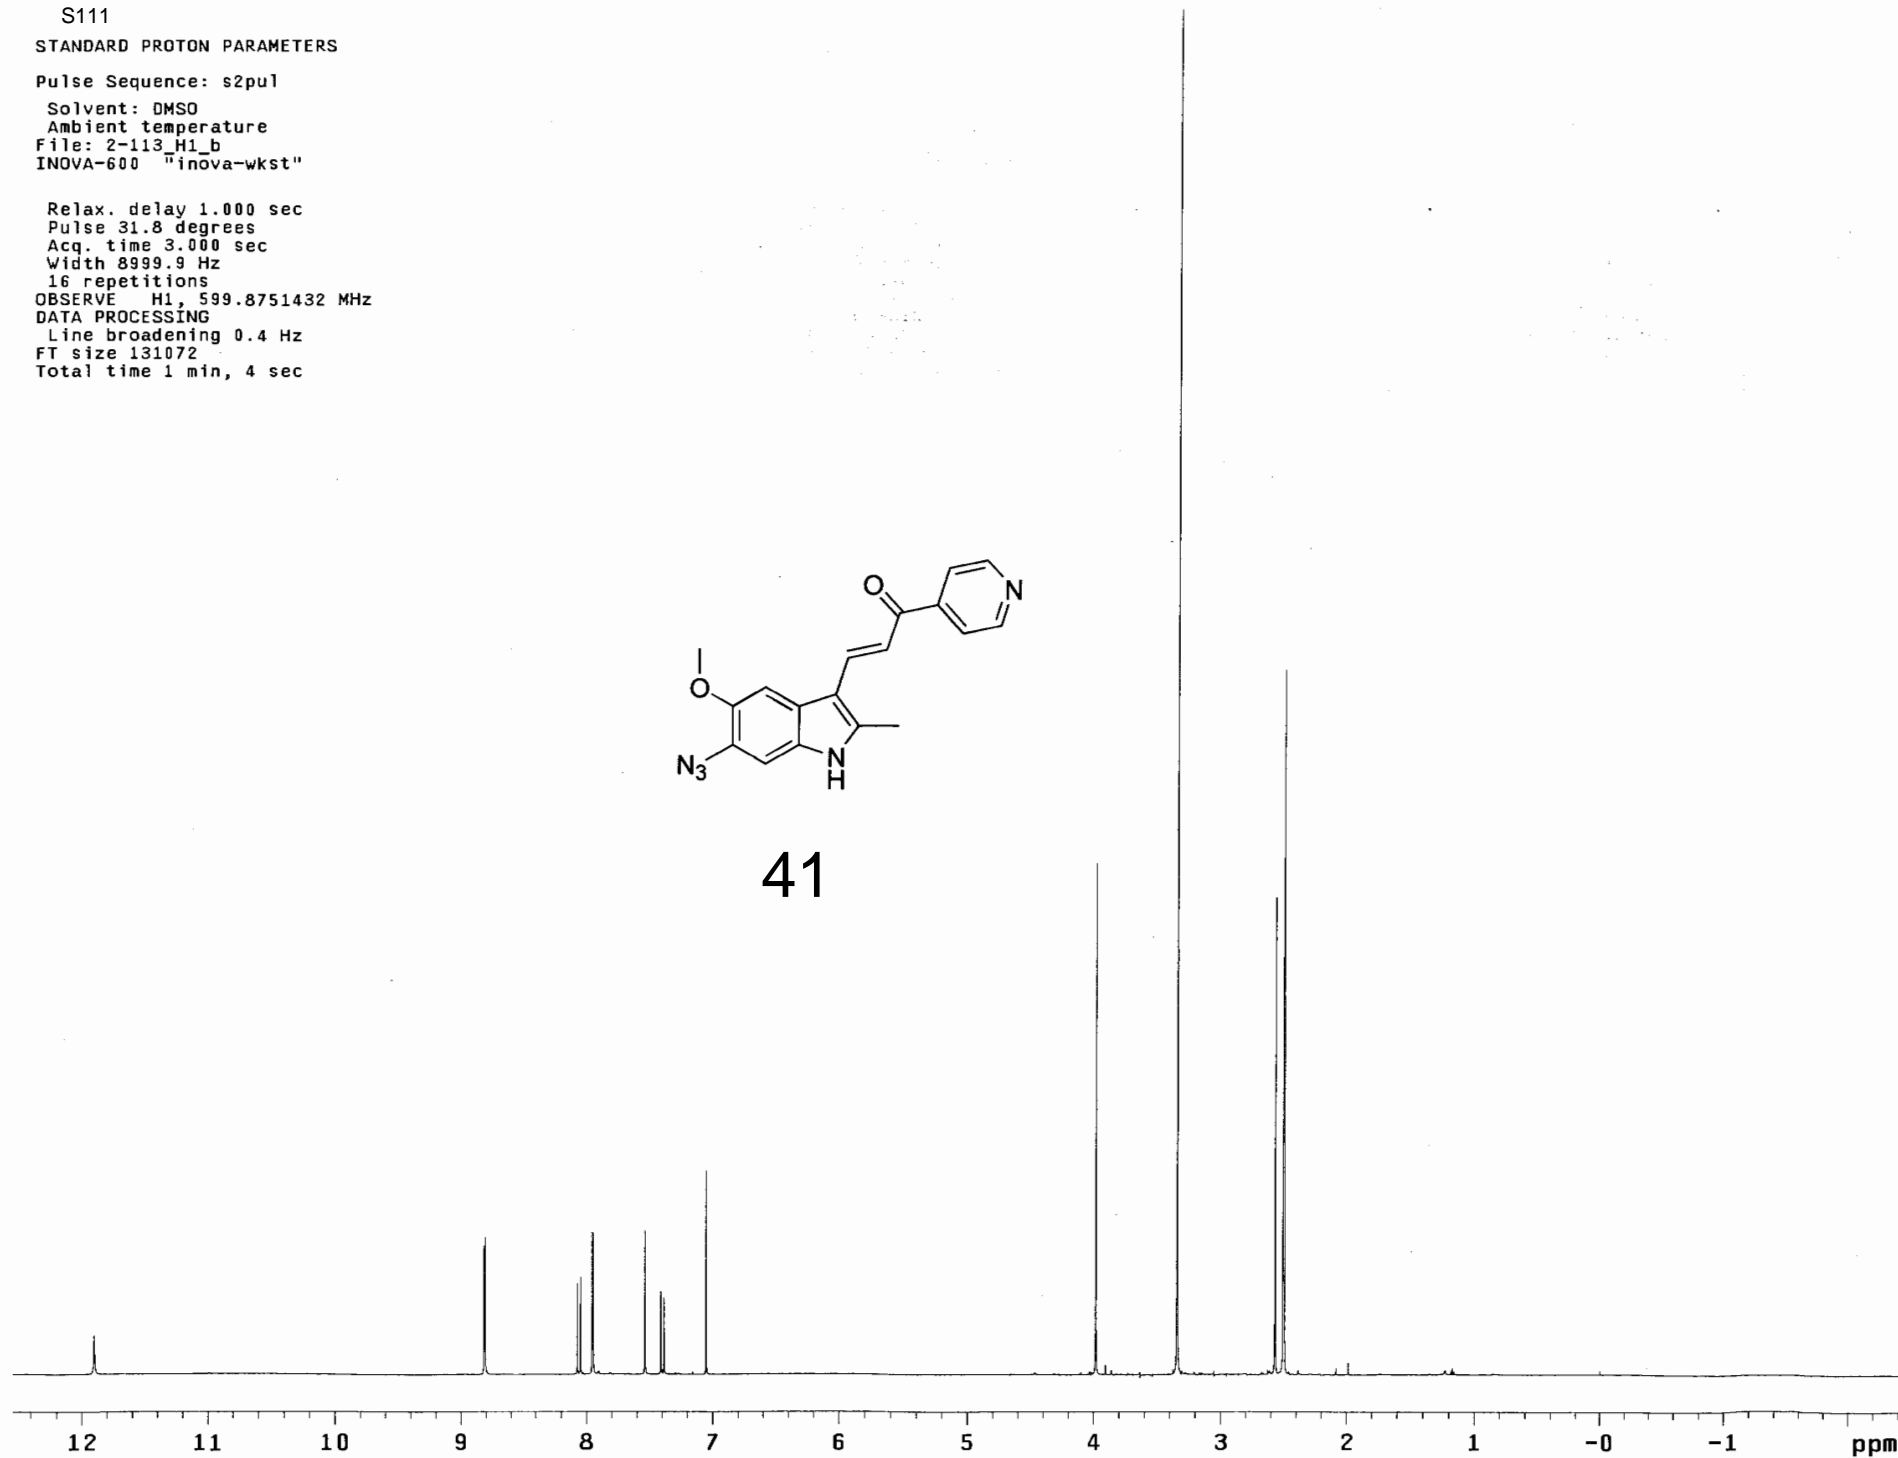

S112

STANDARD CARBON PARAMETERS

Pulse Sequence: s2pu1

Solvent: DMSO

Ambient temperature

User: 1-14-87

File: 2-113\_C13

INOVA-600 "inova-wkst"

Pulse 46.4 degrees

Acq. time 1.000 sec

Width 37735.8 Hz

39968 repetitions

OBSERVE C13, 150.8387910 MHz

DECOUPLE H1, 599.8781638 MHz

Power 32 dB

continuously on

WALTZ-16 modulated

DATA PROCESSING

Gauss window 0.600 sec

center at 0.100 sec

FT size 524288

Total time 28 hr, 1 min, 31 sec

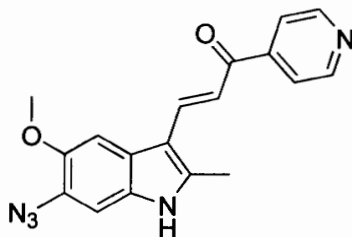

41

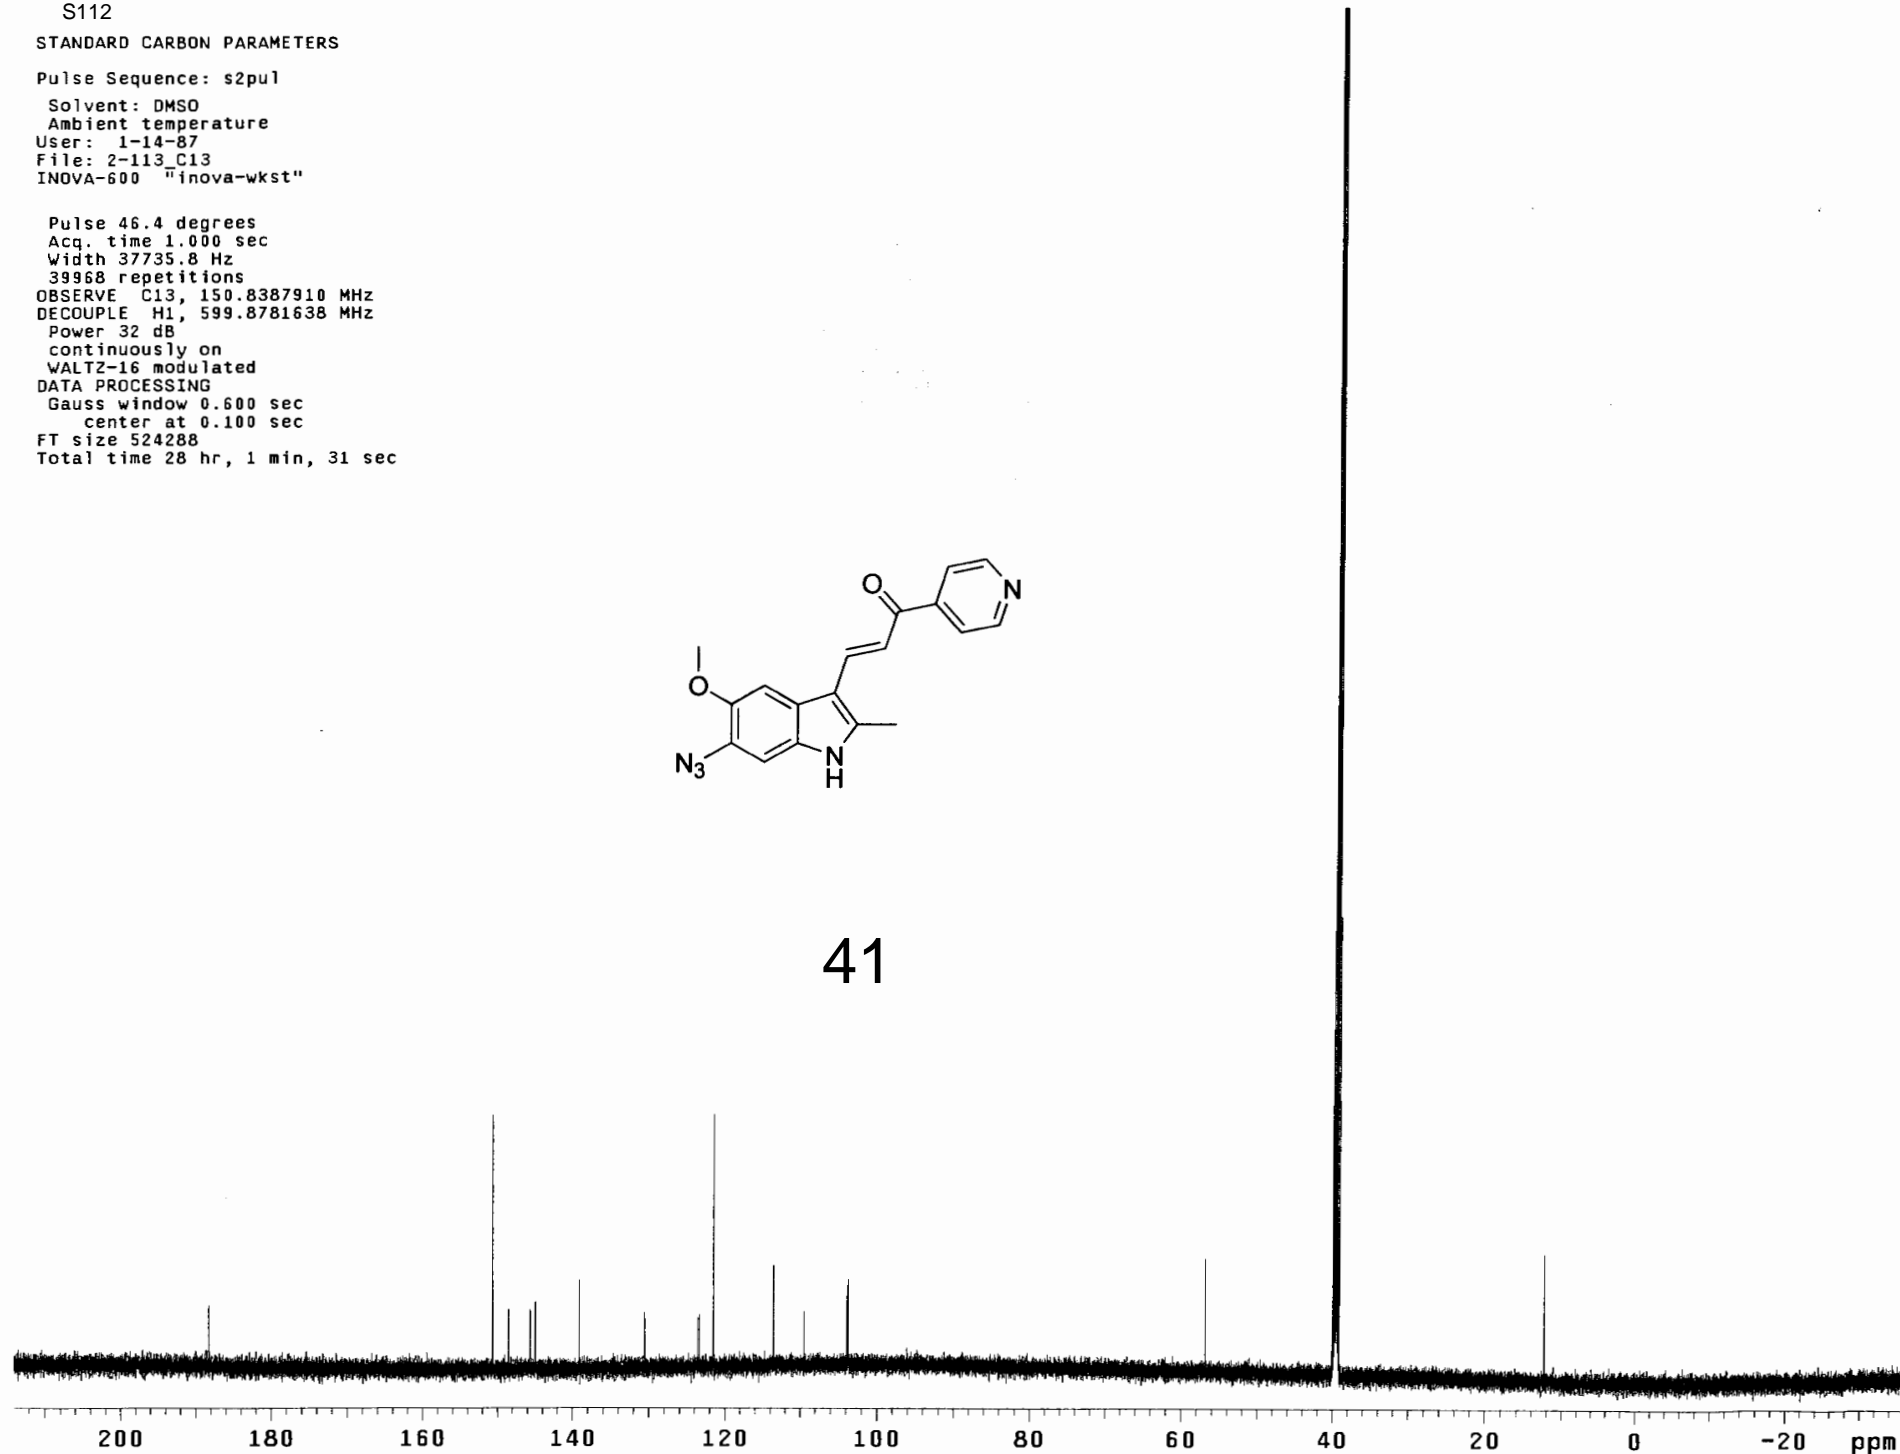



S113

STANDARD PROTON PARAMETERS

Pulse Sequence: gcosy

Solvent: DMSO  
Ambient temperature  
File: 2-113\_cosy  
INOVA-600 "inova-wkst"

Relax. delay 1.000 sec  
Acq. time 0.228 sec  
Width 2247.0 Hz  
2D Width 2247.0 Hz  
Single scan  
93 increments

OBSERVE H1, 599.8751442 MHz

DATA PROCESSING

Sine bell 0.114 sec

F1 DATA PROCESSING

Sine bell 0.021 sec

FT size 1024 x 1024

Total time 1 min, 59 sec

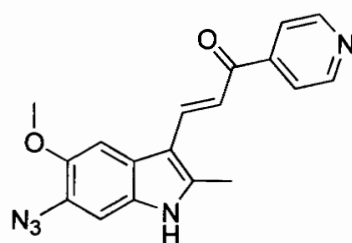

41

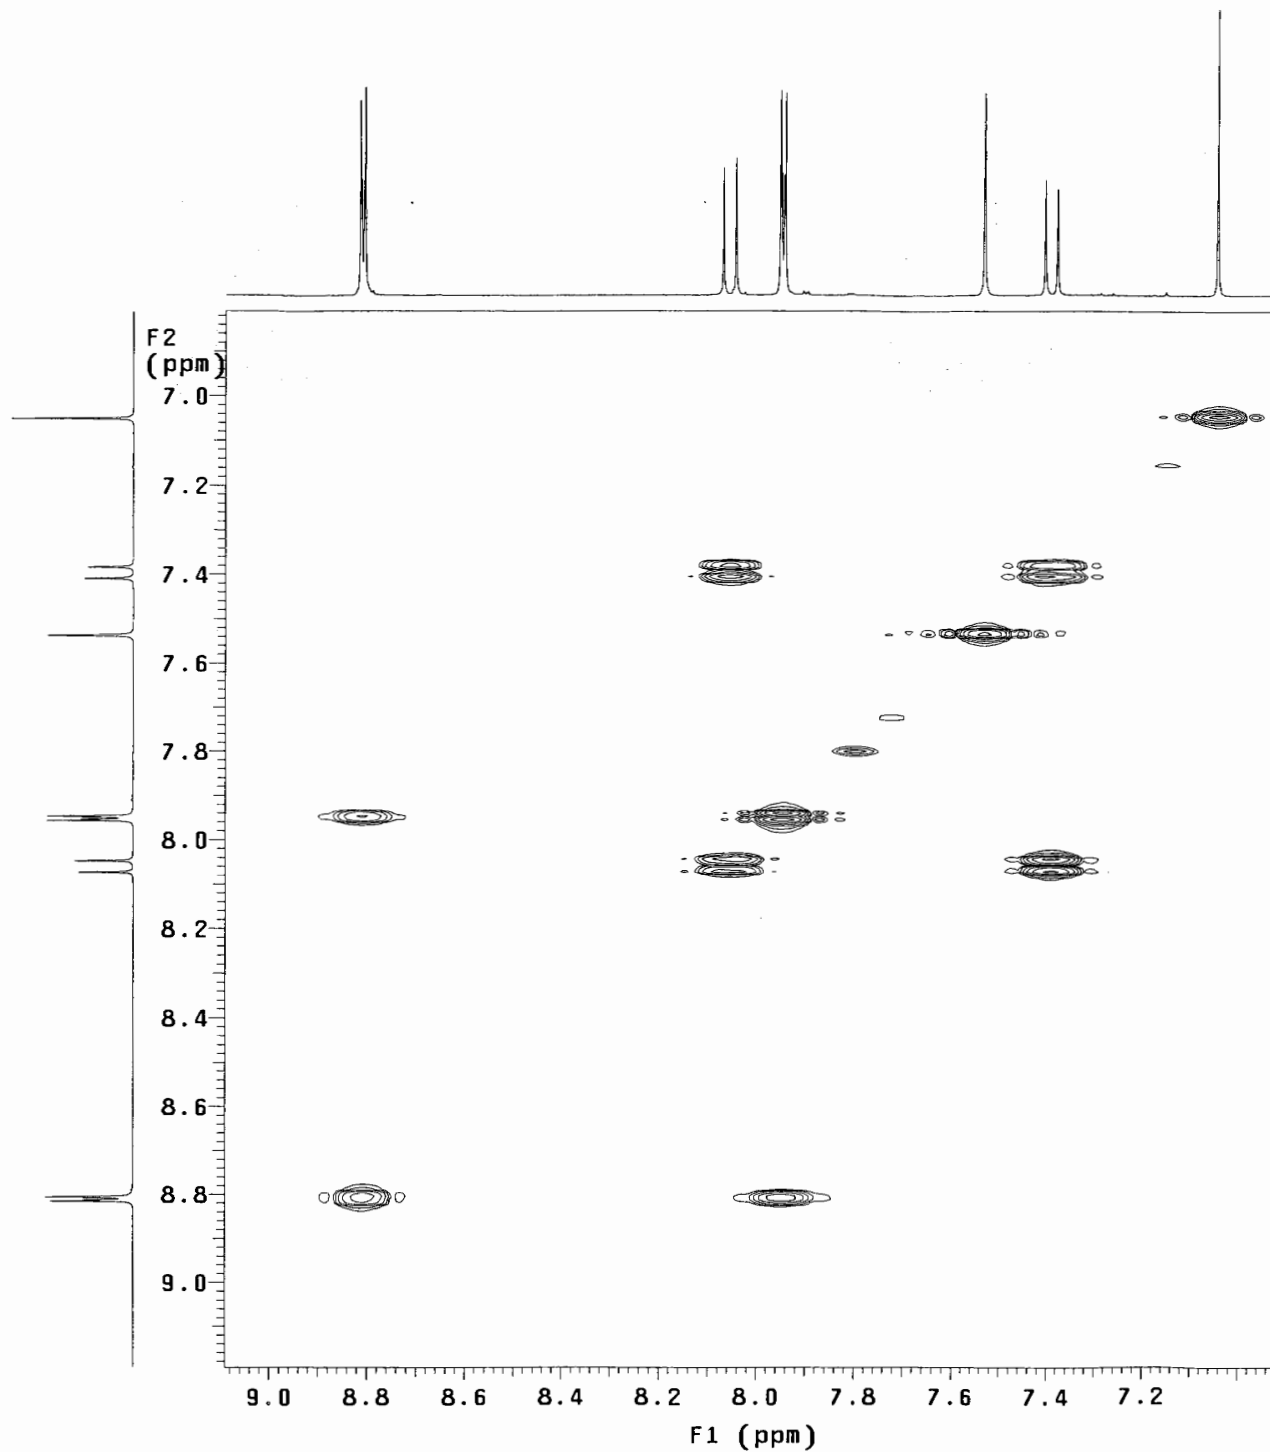

Supplement: NIHMS358457-supplement-1_si_001.pdf [file NIHMS358457-supplement-1_si_001.pdf]
